# Supplementary material for: Increased ATP citrate lyase affects maternal diabetes-induced neural tube defects by promoting the H3K27ac modification through the Gadd45g pathway
Source: Research Square preprint supplement (doi:10.21203/rs.3.rs-1546141/v1), 2022-05-02
Supplement: Supplementary file 1 [file 83291f62b01843c954ba3cc0.xlsx]

## Sheet: Sheet1
Peak_ID	Length	DM_ID	Control_ID	DM_Count	Control_Count	LogFC	PValue	FDR	Regulated	Annotation	GeneId	TranscriptId	Symbol	Description	Synonyms
1_3011414_3011724	311	-	1_3011414_3011724	0	24	-7.33971	2.47519e-06	4.01712e-06	Down	Distal Intergenic	ENSMUSG00000102693	ENSMUST00000193812	4933401J01Rik	-	-
1_3045623_3046599	977	-	1_3045623_3046599	0	73	-8.93858	1.5826e-14	1.51779e-13	Down	Distal Intergenic	ENSMUSG00000102693	ENSMUST00000193812	4933401J01Rik	-	-
1_3060890_3061975	1086	-	1_3060890_3061975	0	96	-9.33301	3.00402e-17	5.62136e-16	Down	Distal Intergenic	ENSMUSG00000102693	ENSMUST00000193812	4933401J01Rik	-	-
1_3062133_3062771	639	-	1_3062133_3062771	0	106	-9.47576	1.08086e-18	2.87966e-17	Down	Distal Intergenic	ENSMUSG00000102693	ENSMUST00000193812	4933401J01Rik	-	-
1_3153409_3154165	757	-	1_3153409_3154165	0	83	-9.12344	2.50387e-16	3.62401e-15	Down	Distal Intergenic	ENSMUSG00000064842	ENSMUST00000082908	Gm26206	-	-
1_3154571_3155522	952	-	1_3154571_3155522	0	131	-9.78087	2.82239e-22	1.68719e-20	Down	Distal Intergenic	ENSMUSG00000064842	ENSMUST00000082908	Gm26206	-	-
1_3156005_3156541	537	-	1_3156005_3156541	0	74	-8.95817	9.9007e-15	1.00274e-13	Down	Distal Intergenic	ENSMUSG00000064842	ENSMUST00000082908	Gm26206	-	-
1_3191722_3192563	842	-	1_3191722_3192563	0	62	-8.70347	1.18945e-12	7.10233e-12	Down	Distal Intergenic	ENSMUSG00000051951	ENSMUST00000159265	Xkr4	X-linked Kx blood group related 4	AY534250|Gm210|XRG4|mKIAA1889
1_3194188_3196134	1947	1_3194374_3194663;1_3194828_3195618	1_3194188_3196134	109	323	-1.00358	0.000114935	0.00016471	Down	Distal Intergenic	ENSMUSG00000051951	ENSMUST00000159265	Xkr4	X-linked Kx blood group related 4	AY534250|Gm210|XRG4|mKIAA1889
1_3199048_3199621	574	-	1_3199048_3199621	0	34	-7.83958	3.02271e-07	5.50653e-07	Down	Distal Intergenic	ENSMUSG00000051951	ENSMUST00000159265	Xkr4	X-linked Kx blood group related 4	AY534250|Gm210|XRG4|mKIAA1889
1_3214951_3215366	416	-	1_3214951_3215366	0	27	-7.50864	8.426e-06	1.282e-05	Down	3' UTR	ENSMUSG00000051951	ENSMUST00000159265	Xkr4	X-linked Kx blood group related 4	AY534250|Gm210|XRG4|mKIAA1889
1_3320789_3321227	439	-	1_3320789_3321227	0	36	-7.9217	1.01568e-07	1.94955e-07	Down	Intron (ENSMUST00000070533/ENSMUSG00000051951, intron 1 of 2)	ENSMUSG00000051951	ENSMUST00000195335	Xkr4	X-linked Kx blood group related 4	AY534250|Gm210|XRG4|mKIAA1889
1_3322076_3322366	291	1_3322076_3322366	-	25	0	7.95843	3.94049e-08	8.10452e-08	Up	Intron (ENSMUST00000070533/ENSMUSG00000051951, intron 1 of 2)	ENSMUSG00000051951	ENSMUST00000195335	Xkr4	X-linked Kx blood group related 4	AY534250|Gm210|XRG4|mKIAA1889
1_3323980_3324386	407	-	1_3323980_3324386	0	25	-7.39824	2.59951e-05	3.8153e-05	Down	Intron (ENSMUST00000070533/ENSMUSG00000051951, intron 1 of 2)	ENSMUSG00000051951	ENSMUST00000195335	Xkr4	X-linked Kx blood group related 4	AY534250|Gm210|XRG4|mKIAA1889
1_3325920_3326411	492	1_3325920_3326201	1_3326040_3326411	49	32	1.17393	0.00269915	0.00364459	Up	Intron (ENSMUST00000070533/ENSMUSG00000051951, intron 1 of 2)	ENSMUSG00000051951	ENSMUST00000195335	Xkr4	X-linked Kx blood group related 4	AY534250|Gm210|XRG4|mKIAA1889
1_3377330_3377568	239	1_3377330_3377568	-	24	0	7.89978	7.04324e-08	1.37487e-07	Up	Promoter (<=1kb)	ENSMUSG00000104017	ENSMUST00000192336	Gm37363	-	-
1_3482216_3482716	501	-	1_3482216_3482716	0	50	-8.39396	1.79489e-10	6.15694e-10	Down	Intron (ENSMUST00000161581/ENSMUSG00000089699, intron 1 of 1)	ENSMUSG00000089699	ENSMUST00000194099	Gm1992	-	-
1_3549753_3551462	1710	-	1_3549753_3551462	0	141	-9.88688	1.43914e-23	1.12577e-21	Down	Intron (ENSMUST00000070533/ENSMUSG00000051951, intron 2 of 2)	ENSMUSG00000051951	ENSMUST00000192183	Xkr4	X-linked Kx blood group related 4	AY534250|Gm210|XRG4|mKIAA1889
1_3645697_3646130	434	-	1_3645697_3646130	0	27	-7.50864	8.426e-06	1.282e-05	Down	Intron (ENSMUST00000070533/ENSMUSG00000051951, intron 2 of 2)	ENSMUSG00000051951	ENSMUST00000192692	Xkr4	X-linked Kx blood group related 4	AY534250|Gm210|XRG4|mKIAA1889
1_3648528_3648862	335	-	1_3648528_3648862	0	26	-7.4545	1.47851e-05	2.21227e-05	Down	Exon (ENSMUST00000192692/ENSMUSG00000102331, exon 2 of 2)	ENSMUSG00000102331	ENSMUST00000192692	Gm19938	-	-
1_3649215_3650559	1345	-	1_3649215_3650559	0	170	-10.1565	2.22372e-27	3.56191e-25	Down	Exon (ENSMUST00000192692/ENSMUSG00000102331, exon 2 of 2)	ENSMUSG00000102331	ENSMUST00000192692	Gm19938	-	-
1_3671854_3672291	438	-	1_3671854_3672291	0	57	-8.58247	8.60156e-12	4.14024e-11	Down	Promoter (<=1kb)	ENSMUSG00000051951	ENSMUST00000070533	Xkr4	X-linked Kx blood group related 4	AY534250|Gm210|XRG4|mKIAA1889
1_3797077_3797881	805	1_3797077_3797575	1_3797193_3797881	64	45	1.0686	0.00277493	0.00374428	Up	Distal Intergenic	ENSMUSG00000088333	ENSMUST00000157708	Gm27396	-	-
1_3799503_3800152	650	1_3799503_3800152	-	79	0	9.61439	1.35626e-21	6.88308e-20	Up	Distal Intergenic	ENSMUSG00000088333	ENSMUST00000157708	Gm27396	-	-
1_3800451_3800713	263	1_3800451_3800713	-	29	0	8.17176	3.99443e-09	1.00658e-08	Up	Distal Intergenic	ENSMUSG00000088333	ENSMUST00000157708	Gm27396	-	-
1_3914883_3915274	392	1_3914883_3915274	-	39	0	8.59789	5.64977e-12	2.78967e-11	Up	Intron (ENSMUST00000194643/ENSMUSG00000102343, intron 1 of 2)	ENSMUSG00000102343	ENSMUST00000192427	Gm37381	-	-
1_3950534_3950876	343	-	1_3950534_3950876	0	24	-7.33971	2.47519e-06	4.01712e-06	Down	Intron (ENSMUST00000194643/ENSMUSG00000102343, intron 1 of 2)	ENSMUSG00000102343	ENSMUST00000192427	Gm37381	-	-
1_3951939_3953639	1701	1_3953315_3953577	1_3951939_3953639	47	252	-1.85749	4.59467e-10	1.40949e-09	Down	Intron (ENSMUST00000194643/ENSMUSG00000102343, intron 1 of 2)	ENSMUSG00000102343	ENSMUST00000192427	Gm37381	-	-
1_4063690_4064240	551	-	1_4063690_4064240	0	38	-7.99939	5.909e-08	1.17873e-07	Down	Intron (ENSMUST00000208660/ENSMUSG00000025900, intron 5 of 29)	ENSMUSG00000025900	ENSMUST00000194643	Rp1	retinitis pigmentosa 1 (human)	Dcdc3|Orp1|Rp1h|mG145
1_4138365_4138740	376	-	1_4138365_4138740	0	39	-8.03672	3.4461e-08	7.26383e-08	Down	Intron (ENSMUST00000208660/ENSMUSG00000025900, intron 8 of 29)	ENSMUSG00000025900	ENSMUST00000195384	Rp1	retinitis pigmentosa 1 (human)	Dcdc3|Orp1|Rp1h|mG145
1_4148480_4153333	4854	1_4148627_4148892;1_4149188_4149687;1_4150563_4151200	1_4148480_4153333	151	464	-1.05612	1.70158e-05	2.53266e-05	Down	Exon (ENSMUST00000208660/ENSMUSG00000025900, exon 20 of 30)	ENSMUSG00000025900	ENSMUST00000195384	Rp1	retinitis pigmentosa 1 (human)	Dcdc3|Orp1|Rp1h|mG145
1_4154603_4154885	283	1_4154603_4154885	-	29	0	8.17176	3.99443e-09	1.00658e-08	Up	Intron (ENSMUST00000208660/ENSMUSG00000025900, intron 11 of 29)	ENSMUSG00000025900	ENSMUST00000195384	Rp1	retinitis pigmentosa 1 (human)	Dcdc3|Orp1|Rp1h|mG145
1_4211666_4212714	1049	1_4211666_4211910	1_4211675_4212714	35	113	-1.12569	0.00111828	0.00154123	Down	Intron (ENSMUST00000208660/ENSMUSG00000025900, intron 15 of 29)	ENSMUSG00000025900	ENSMUST00000195384	Rp1	retinitis pigmentosa 1 (human)	Dcdc3|Orp1|Rp1h|mG145
1_4787554_4788016	463	-	1_4787554_4788016	0	35	-7.88122	1.75007e-07	3.29918e-07	Down	Distal Intergenic	ENSMUSG00000033845	ENSMUST00000156816	Mrpl15	mitochondrial ribosomal protein L15	HSPC145|MRP-L7|Rpml7
1_4799052_4799480	429	-	1_4799052_4799480	0	32	-7.75251	9.08175e-07	1.53104e-06	Down	Distal Intergenic	ENSMUSG00000025903	ENSMUST00000134384	Lypla1	lysophospholipase 1	APT-1|Gm39587|LPL-I|Pla1a
1_4801032_4802649	1618	1_4801060_4801467;1_4802087_4802476	1_4801032_4802649	108	320	-1.00341	0.000128687	0.00018408	Down	Distal Intergenic	ENSMUSG00000025903	ENSMUST00000134384	Lypla1	lysophospholipase 1	APT-1|Gm39587|LPL-I|Pla1a
1_4808187_4809161	975	-	1_4808187_4809161	0	73	-8.93858	1.5826e-14	1.51779e-13	Down	Promoter (<=1kb)	ENSMUSG00000025903	ENSMUST00000131119	Lypla1	lysophospholipase 1	APT-1|Gm39587|LPL-I|Pla1a
1_4813540_4813783	244	1_4813540_4813783	-	28	0	8.12131	7.04361e-09	1.66011e-08	Up	Intron (ENSMUST00000134384/ENSMUSG00000025903, intron 2 of 9)	ENSMUSG00000025903	ENSMUST00000131119	Lypla1	lysophospholipase 1	APT-1|Gm39587|LPL-I|Pla1a
1_4819638_4820454	817	-	1_4819638_4820454	0	65	-8.77148	4.48437e-13	2.89102e-12	Down	Intron (ENSMUST00000134384/ENSMUSG00000025903, intron 2 of 9)	ENSMUSG00000025903	ENSMUST00000131119	Lypla1	lysophospholipase 1	APT-1|Gm39587|LPL-I|Pla1a
1_4855090_4857628	2539	1_4857095_4857521	1_4855090_4857628	44	275	-2.07838	4.68316e-12	2.45956e-11	Down	Promoter (<=1kb)	ENSMUSG00000033813	ENSMUST00000081551	Tcea1	transcription elongation factor A (SII) 1	S-II
1_4857785_4858538	754	-	1_4857785_4858538	0	90	-9.24005	2.68427e-17	5.11637e-16	Down	Promoter (<=1kb)	ENSMUSG00000033813	ENSMUST00000081551	Tcea1	transcription elongation factor A (SII) 1	S-II
1_4860873_4861362	490	-	1_4860873_4861362	0	39	-8.03672	3.4461e-08	7.26383e-08	Down	Intron (ENSMUST00000155020/ENSMUSG00000104217, intron 7 of 9)	ENSMUSG00000104217	ENSMUST00000165720	Gm37988	-	-
1_4861533_4861843	311	-	1_4861533_4861843	0	26	-7.4545	1.47851e-05	2.21227e-05	Down	Intron (ENSMUST00000155020/ENSMUSG00000104217, intron 7 of 9)	ENSMUSG00000104217	ENSMUST00000165720	Gm37988	-	-
1_4862088_4862510	423	-	1_4862088_4862510	0	28	-7.56082	4.812e-06	7.49864e-06	Down	Intron (ENSMUST00000155020/ENSMUSG00000104217, intron 7 of 9)	ENSMUSG00000104217	ENSMUST00000165720	Gm37988	-	-
1_4904414_4904742	329	-	1_4904414_4904742	0	32	-7.75251	9.08175e-07	1.53104e-06	Down	Downstream (1-2kb)	ENSMUSG00000103280	ENSMUST00000194052	Gm37277	-	-
1_4926036_4926385	350	1_4926036_4926385	-	27	0	8.06903	1.24618e-08	2.79243e-08	Up	Intron (ENSMUST00000002533/ENSMUSG00000002459, intron 4 of 4)	ENSMUSG00000002459	ENSMUST00000168963	Rgs20	regulator of G-protein signaling 20	2900073E09Rik|Rgsz1
1_4933041_4934192	1152	-	1_4933041_4934192	0	134	-9.8135	1.33025e-22	8.37699e-21	Down	Intron (ENSMUST00000002533/ENSMUSG00000002459, intron 4 of 4)	ENSMUSG00000002459	ENSMUST00000168963	Rgs20	regulator of G-protein signaling 20	2900073E09Rik|Rgsz1
1_4934543_4935054	512	-	1_4934543_4935054	0	57	-8.58247	8.60156e-12	4.14024e-11	Down	Intron (ENSMUST00000002533/ENSMUSG00000002459, intron 4 of 4)	ENSMUSG00000002459	ENSMUST00000194114	Rgs20	regulator of G-protein signaling 20	2900073E09Rik|Rgsz1
1_4935469_4936408	940	-	1_4935469_4936408	0	73	-8.93858	1.5826e-14	1.51779e-13	Down	Intron (ENSMUST00000002533/ENSMUSG00000002459, intron 4 of 4)	ENSMUSG00000002459	ENSMUST00000194114	Rgs20	regulator of G-protein signaling 20	2900073E09Rik|Rgsz1
1_4936707_4937142	436	-	1_4936707_4937142	0	35	-7.88122	1.75007e-07	3.29918e-07	Down	Intron (ENSMUST00000002533/ENSMUSG00000002459, intron 4 of 4)	ENSMUSG00000002459	ENSMUST00000194114	Rgs20	regulator of G-protein signaling 20	2900073E09Rik|Rgsz1
1_4964180_4964471	292	1_4964180_4964471	-	30	0	8.2205	1.29729e-09	3.54454e-09	Up	Intron (ENSMUST00000002533/ENSMUSG00000002459, intron 4 of 4)	ENSMUSG00000002459	ENSMUST00000144339	Rgs20	regulator of G-protein signaling 20	2900073E09Rik|Rgsz1
1_4970156_4970602	447	-	1_4970156_4970602	0	51	-8.42245	1.79489e-10	6.15694e-10	Down	Promoter (<=1kb)	ENSMUSG00000085623	ENSMUST00000144339	Gm16041	-	-
1_4972829_4973159	331	-	1_4972829_4973159	0	28	-7.56082	4.812e-06	7.49864e-06	Down	Intron (ENSMUST00000144339/ENSMUSG00000085623, intron 2 of 2)	ENSMUSG00000085623	ENSMUST00000144339	Gm16041	-	-
1_5231039_5231349	311	-	1_5231039_5231349	0	23	-7.27869	4.53786e-06	7.16963e-06	Down	Distal Intergenic	ENSMUSG00000104352	ENSMUST00000193351	Gm7182	-	-
1_5231888_5232662	775	-	1_5231888_5232662	0	57	-8.58247	8.60156e-12	4.14024e-11	Down	Distal Intergenic	ENSMUSG00000104352	ENSMUST00000193351	Gm7182	-	-
1_5233078_5233520	443	-	1_5233078_5233520	0	41	-8.1086	1.18072e-08	2.73413e-08	Down	Distal Intergenic	ENSMUSG00000104352	ENSMUST00000193351	Gm7182	-	-
1_5262332_5262878	547	1_5262332_5262878	-	60	0	9.21808	3.71245e-17	6.70091e-16	Up	Distal Intergenic	ENSMUSG00000104352	ENSMUST00000193351	Gm7182	-	-
1_5588833_5589240	408	-	1_5588833_5589240	0	40	-8.0731	2.01468e-08	4.43681e-08	Down	Promoter (<=1kb)	ENSMUSG00000025905	ENSMUST00000160339	Oprk1	opioid receptor, kappa 1	K-OR-1|KOR|KOR-1|MSL-1|Oprk2|R21
1_5778655_5778903	249	1_5778655_5778903	-	48	0	8.89676	3.27725e-14	2.96107e-13	Up	Distal Intergenic	ENSMUSG00000103519	ENSMUST00000193807	Gm37429	-	-
1_5795232_5795482	251	1_5795232_5795482	-	34	0	8.4005	1.42164e-10	4.99774e-10	Up	Distal Intergenic	ENSMUSG00000103519	ENSMUST00000193807	Gm37429	-	-
1_5796539_5797243	705	-	1_5796539_5797243	0	51	-8.42245	1.79489e-10	6.15694e-10	Down	Distal Intergenic	ENSMUSG00000103519	ENSMUST00000193807	Gm37429	-	-
1_5943236_5943555	320	-	1_5943236_5943555	0	34	-7.83958	3.02271e-07	5.50653e-07	Down	Distal Intergenic	ENSMUSG00000033774	ENSMUST00000044180	Npbwr1	neuropeptides B/W receptor 1	Gpr7|Nbpwr1
1_6022964_6024222	1259	-	1_6022964_6024222	0	80	-9.07042	9.7909e-16	1.30957e-14	Down	Distal Intergenic	ENSMUSG00000103090	ENSMUST00000191956	Gm19214	-	-
1_6052154_6052521	368	1_6052154_6052521	-	32	0	8.31331	4.26767e-10	1.30949e-09	Up	Distal Intergenic	ENSMUSG00000103090	ENSMUST00000191956	Gm19214	-	-
1_6053066_6053456	391	-	1_6053066_6053456	0	25	-7.39824	2.59951e-05	3.8153e-05	Down	Distal Intergenic	ENSMUSG00000103090	ENSMUST00000191956	Gm19214	-	-
1_6075196_6075515	320	1_6075196_6075515	-	35	0	8.4422	8.24314e-11	3.08621e-10	Up	Distal Intergenic	ENSMUSG00000103090	ENSMUST00000191956	Gm19214	-	-
1_6214098_6216038	1941	1_6215223_6215479	1_6214098_6216038	37	310	-2.50048	3.25781e-16	4.71091e-15	Down	Promoter (<=1kb)	ENSMUSG00000025907	ENSMUST00000027040	Rb1cc1	RB1-inducible coiled-coil 1	2900055E04Rik|5930404L04Rik|Cc1|FIP200|LaXp180
1_6458271_6458688	418	1_6458271_6458688	-	35	0	8.4422	8.24314e-11	3.08621e-10	Up	Distal Intergenic	ENSMUSG00000103845	ENSMUST00000194240	Gm19026	-	-
1_6708039_6708351	313	1_6708039_6708351	-	21	0	7.708	4.1078e-07	7.32295e-07	Up	Intron (ENSMUST00000140079/ENSMUSG00000033740, intron 2 of 23)	ENSMUSG00000033740	ENSMUST00000043578	St18	suppression of tumorigenicity 18	AV348974|Myt3|NZF-3|Nzf3|mKIAA0535
1_7008075_7008463	389	1_7008075_7008463	-	37	0	8.52215	1.63617e-11	7.0045e-11	Up	Distal Intergenic	ENSMUSG00000102213	ENSMUST00000191883	Gm37489	-	-
1_7014449_7015035	587	1_7014449_7015035	-	51	0	8.98404	4.49613e-15	4.86904e-14	Up	Downstream (<1kb)	ENSMUSG00000102213	ENSMUST00000191883	Gm37489	-	-
1_7023769_7024022	254	1_7023769_7024022	-	35	0	8.4422	8.24314e-11	3.08621e-10	Up	Distal Intergenic	ENSMUSG00000102213	ENSMUST00000191883	Gm37489	-	-
1_7048060_7048383	324	1_7048060_7048383	-	34	0	8.4005	1.42164e-10	4.99774e-10	Up	Distal Intergenic	ENSMUSG00000103629	ENSMUST00000195648	Gm5694	-	-
1_7050500_7050863	364	1_7050500_7050863	-	43	0	8.73841	4.15962e-13	2.73662e-12	Up	Distal Intergenic	ENSMUSG00000103629	ENSMUST00000195648	Gm5694	-	-
1_7051422_7051984	563	1_7051422_7051984	-	67	0	9.37702	5.99836e-19	1.69838e-17	Up	Distal Intergenic	ENSMUSG00000103629	ENSMUST00000195648	Gm5694	-	-
1_7052663_7053441	779	1_7052730_7053441	1_7052663_7053173	92	56	1.27691	7.89695e-05	0.000113863	Up	Distal Intergenic	ENSMUSG00000103629	ENSMUST00000195648	Gm5694	-	-
1_7053517_7053987	471	-	1_7053517_7053987	0	43	-8.17707	4.08541e-09	1.01592e-08	Down	Distal Intergenic	ENSMUSG00000103629	ENSMUST00000195648	Gm5694	-	-
1_7093804_7094154	351	1_7093804_7094154	-	48	0	8.89676	3.27725e-14	2.96107e-13	Up	Intron (ENSMUST00000061280/ENSMUSG00000051285, intron 1 of 5)	ENSMUSG00000051285	ENSMUST00000182823	Pcmtd1	protein-L-isoaspartate (D-aspartate) O-methyltransferase domain containing 1	8430411F12Rik|A030012M09Rik
1_7094326_7095034	709	1_7094326_7095034	1_7094419_7094729	57	33	1.3475	0.00036304	0.000510762	Up	Intron (ENSMUST00000061280/ENSMUSG00000051285, intron 1 of 5)	ENSMUSG00000051285	ENSMUST00000182823	Pcmtd1	protein-L-isoaspartate (D-aspartate) O-methyltransferase domain containing 1	8430411F12Rik|A030012M09Rik
1_7095846_7096582	737	1_7095846_7096582	1_7095892_7096427	89	44	1.57601	3.02753e-06	4.83572e-06	Up	Intron (ENSMUST00000061280/ENSMUSG00000051285, intron 1 of 5)	ENSMUSG00000051285	ENSMUST00000182823	Pcmtd1	protein-L-isoaspartate (D-aspartate) O-methyltransferase domain containing 1	8430411F12Rik|A030012M09Rik
1_7098598_7098848	251	1_7098598_7098848	-	29	0	8.17176	3.99443e-09	1.00658e-08	Up	Intron (ENSMUST00000061280/ENSMUSG00000051285, intron 1 of 5)	ENSMUSG00000051285	ENSMUST00000182823	Pcmtd1	protein-L-isoaspartate (D-aspartate) O-methyltransferase domain containing 1	8430411F12Rik|A030012M09Rik
1_7099902_7100851	950	1_7099902_7100851	-	117	0	10.1804	5.55015e-29	1.16876e-26	Up	Intron (ENSMUST00000061280/ENSMUSG00000051285, intron 1 of 5)	ENSMUSG00000051285	ENSMUST00000182823	Pcmtd1	protein-L-isoaspartate (D-aspartate) O-methyltransferase domain containing 1	8430411F12Rik|A030012M09Rik
1_7104807_7105405	599	-	1_7104807_7105405	0	66	-8.79346	2.7628e-13	1.91851e-12	Down	Intron (ENSMUST00000061280/ENSMUSG00000051285, intron 1 of 5)	ENSMUSG00000051285	ENSMUST00000182823	Pcmtd1	protein-L-isoaspartate (D-aspartate) O-methyltransferase domain containing 1	8430411F12Rik|A030012M09Rik
1_7105787_7106109	323	1_7105787_7106109	-	47	0	8.86645	5.41924e-14	4.56184e-13	Up	Intron (ENSMUST00000061280/ENSMUSG00000051285, intron 1 of 5)	ENSMUSG00000051285	ENSMUST00000182823	Pcmtd1	protein-L-isoaspartate (D-aspartate) O-methyltransferase domain containing 1	8430411F12Rik|A030012M09Rik
1_7106352_7106856	505	1_7106352_7106856	-	45	0	8.80385	1.49345e-13	1.11491e-12	Up	Intron (ENSMUST00000061280/ENSMUSG00000051285, intron 1 of 5)	ENSMUSG00000051285	ENSMUST00000182823	Pcmtd1	protein-L-isoaspartate (D-aspartate) O-methyltransferase domain containing 1	8430411F12Rik|A030012M09Rik
1_7108682_7108953	272	1_7108682_7108953	-	31	0	8.26765	7.42892e-10	2.14936e-09	Up	Intron (ENSMUST00000061280/ENSMUSG00000051285, intron 1 of 5)	ENSMUSG00000051285	ENSMUST00000182823	Pcmtd1	protein-L-isoaspartate (D-aspartate) O-methyltransferase domain containing 1	8430411F12Rik|A030012M09Rik
1_7109866_7111800	1935	1_7109866_7111800	1_7110365_7110949;1_7111152_7111661	202	110	1.43857	7.84021e-08	1.52984e-07	Up	Intron (ENSMUST00000061280/ENSMUSG00000051285, intron 1 of 5)	ENSMUSG00000051285	ENSMUST00000182823	Pcmtd1	protein-L-isoaspartate (D-aspartate) O-methyltransferase domain containing 1	8430411F12Rik|A030012M09Rik
1_7112821_7114508	1688	1_7112821_7114508	1_7112834_7114340	171	104	1.27915	3.43295e-06	5.47707e-06	Up	Intron (ENSMUST00000061280/ENSMUSG00000051285, intron 1 of 5)	ENSMUSG00000051285	ENSMUST00000182051	Pcmtd1	protein-L-isoaspartate (D-aspartate) O-methyltransferase domain containing 1	8430411F12Rik|A030012M09Rik
1_7140647_7142672	2026	-	1_7140647_7142672	0	149	-9.96642	1.14117e-24	1.09231e-22	Down	Intron (ENSMUST00000061280/ENSMUSG00000051285, intron 2 of 5)	ENSMUSG00000051285	ENSMUST00000182051	Pcmtd1	protein-L-isoaspartate (D-aspartate) O-methyltransferase domain containing 1	8430411F12Rik|A030012M09Rik
1_7147002_7147363	362	1_7147002_7147363	-	42	0	8.70454	1.17118e-12	7.07889e-12	Up	Promoter (<=1kb)	ENSMUSG00000051285	ENSMUST00000182675	Pcmtd1	protein-L-isoaspartate (D-aspartate) O-methyltransferase domain containing 1	8430411F12Rik|A030012M09Rik
1_7150182_7150449	268	1_7150182_7150449	-	23	0	7.83864	2.27396e-07	4.21299e-07	Up	Exon (ENSMUST00000194854/ENSMUSG00000103509, exon 1 of 1)	ENSMUSG00000103509	ENSMUST00000194854	Gm38372	-	-
1_7152367_7152648	282	1_7152367_7152648	-	37	0	8.52215	1.63617e-11	7.0045e-11	Up	Intron (ENSMUST00000061280/ENSMUSG00000051285, intron 3 of 5)	ENSMUSG00000051285	ENSMUST00000182388	Pcmtd1	protein-L-isoaspartate (D-aspartate) O-methyltransferase domain containing 1	8430411F12Rik|A030012M09Rik
1_7159286_7159755	470	1_7159286_7159755	-	53	0	9.03943	1.69034e-15	2.06502e-14	Up	Promoter (<=1kb)	ENSMUSG00000051285	ENSMUST00000182892	Pcmtd1	protein-L-isoaspartate (D-aspartate) O-methyltransferase domain containing 1	8430411F12Rik|A030012M09Rik
1_7168070_7168478	409	1_7168070_7168478	-	35	0	8.4422	8.24314e-11	3.08621e-10	Up	Intron (ENSMUST00000061280/ENSMUSG00000051285, intron 5 of 5)	ENSMUSG00000051285	ENSMUST00000183204	Pcmtd1	protein-L-isoaspartate (D-aspartate) O-methyltransferase domain containing 1	8430411F12Rik|A030012M09Rik
1_7230168_7230545	378	1_7230168_7230545	-	30	0	8.2205	1.29729e-09	3.54454e-09	Up	Distal Intergenic	ENSMUSG00000077244	ENSMUST00000104056	Gm23274	-	-
1_7440789_7441099	311	-	1_7440789_7441099	0	24	-7.33971	2.47519e-06	4.01712e-06	Down	Distal Intergenic	ENSMUSG00000103498	ENSMUST00000193998	Gm18984	-	-
1_7492920_7494125	1206	1_7492920_7493204;1_7493564_7494125	1_7493125_7493569	74	32	1.76767	1.23308e-06	2.07359e-06	Up	Distal Intergenic	ENSMUSG00000103067	ENSMUST00000194886	Gm30414	-	-
1_7500282_7500592	311	-	1_7500282_7500592	0	27	-7.50864	8.426e-06	1.282e-05	Down	Exon (ENSMUST00000194886/ENSMUSG00000103067, exon 2 of 3)	ENSMUSG00000103067	ENSMUST00000194886	Gm30414	-	-
1_7509286_7509524	239	1_7509286_7509524	-	23	0	7.83864	2.27396e-07	4.21299e-07	Up	Intron (ENSMUST00000194886/ENSMUSG00000103067, intron 2 of 2)	ENSMUSG00000103067	ENSMUST00000194886	Gm30414	-	-
1_7543002_7543417	416	-	1_7543002_7543417	0	32	-7.75251	9.08175e-07	1.53104e-06	Down	Distal Intergenic	ENSMUSG00000103067	ENSMUST00000194886	Gm30414	-	-
1_7543914_7545757	1844	1_7544044_7544341	1_7543914_7545757	35	148	-1.51451	5.30216e-06	8.25515e-06	Down	Distal Intergenic	ENSMUSG00000102320	ENSMUST00000195081	Gm37791	-	-
1_7546313_7546602	290	1_7546313_7546602	-	34	0	8.4005	1.42164e-10	4.99774e-10	Up	Distal Intergenic	ENSMUSG00000102320	ENSMUST00000195081	Gm37791	-	-
1_7567585_7567946	362	1_7567585_7567946	-	51	0	8.98404	4.49613e-15	4.86904e-14	Up	Distal Intergenic	ENSMUSG00000102320	ENSMUST00000195081	Gm37791	-	-
1_7578854_7579243	390	1_7578854_7579243	-	33	0	8.35756	2.45934e-10	8.02848e-10	Up	Distal Intergenic	ENSMUSG00000102320	ENSMUST00000195081	Gm37791	-	-
1_7579845_7580415	571	-	1_7579845_7580415	0	46	-8.27404	1.42755e-09	3.85364e-09	Down	Distal Intergenic	ENSMUSG00000102320	ENSMUST00000195081	Gm37791	-	-
1_7581292_7581530	239	1_7581292_7581530	-	24	0	7.89978	7.04324e-08	1.37487e-07	Up	Distal Intergenic	ENSMUSG00000102320	ENSMUST00000195081	Gm37791	-	-
1_7583709_7584167	459	-	1_7583709_7584167	0	52	-8.45038	1.07531e-10	3.97431e-10	Down	Distal Intergenic	ENSMUSG00000102320	ENSMUST00000195081	Gm37791	-	-
1_7584525_7586096	1572	1_7584525_7585507	1_7585361_7586096	88	56	1.21285	0.000202439	0.000287583	Up	Distal Intergenic	ENSMUSG00000102320	ENSMUST00000195081	Gm37791	-	-
1_7586181_7586430	250	1_7586181_7586430	-	37	0	8.52215	1.63617e-11	7.0045e-11	Up	Distal Intergenic	ENSMUSG00000102320	ENSMUST00000195081	Gm37791	-	-
1_7591215_7592093	879	1_7591215_7592047	1_7591534_7592093	97	66	1.11672	0.000350466	0.000493431	Up	Promoter (<=1kb)	ENSMUSG00000102320	ENSMUST00000195081	Gm37791	-	-
1_7603834_7604196	363	-	1_7603834_7604196	0	30	-7.65985	1.5797e-06	2.60196e-06	Down	Distal Intergenic	ENSMUSG00000104226	ENSMUST00000194219	Gm7470	-	-
1_7611865_7612436	572	1_7611865_7612436	-	46	0	8.83549	8.98453e-14	7.11197e-13	Up	Distal Intergenic	ENSMUSG00000104226	ENSMUST00000194219	Gm7470	-	-
1_7616287_7616903	617	-	1_7616287_7616903	0	54	-8.50467	3.88735e-11	1.62113e-10	Down	Distal Intergenic	ENSMUSG00000104226	ENSMUST00000194219	Gm7470	-	-
1_7618161_7618614	454	-	1_7618161_7618614	0	39	-8.03672	3.4461e-08	7.26383e-08	Down	Distal Intergenic	ENSMUSG00000104226	ENSMUST00000194219	Gm7470	-	-
1_7628530_7628939	410	1_7628530_7628939	-	43	0	8.73841	4.15962e-13	2.73662e-12	Up	Distal Intergenic	ENSMUSG00000104226	ENSMUST00000194219	Gm7470	-	-
1_7629316_7629783	468	1_7629316_7629783	-	34	0	8.4005	1.42164e-10	4.99774e-10	Up	Distal Intergenic	ENSMUSG00000104226	ENSMUST00000194219	Gm7470	-	-
1_7654309_7654562	254	1_7654309_7654562	-	26	0	8.01479	2.21221e-08	4.74092e-08	Up	Distal Intergenic	ENSMUSG00000103903	ENSMUST00000194305	Rps2-ps2	-	-
1_7732067_7732587	521	-	1_7732067_7732587	0	35	-7.88122	1.75007e-07	3.29918e-07	Down	Distal Intergenic	ENSMUSG00000103557	ENSMUST00000194872	Gm38216	-	-
1_7765397_7765635	239	1_7765397_7765635	-	37	0	8.52215	1.63617e-11	7.0045e-11	Up	Distal Intergenic	ENSMUSG00000103557	ENSMUST00000194872	Gm38216	-	-
1_7769564_7769802	239	1_7769564_7769802	-	21	0	7.708	4.1078e-07	7.32295e-07	Up	Distal Intergenic	ENSMUSG00000103557	ENSMUST00000194872	Gm38216	-	-
1_7773323_7773658	336	1_7773323_7773658	-	32	0	8.31331	4.26767e-10	1.30949e-09	Up	Distal Intergenic	ENSMUSG00000103557	ENSMUST00000194872	Gm38216	-	-
1_7779262_7779750	489	1_7779262_7779750	-	65	0	9.33337	2.32769e-18	5.94095e-17	Up	Distal Intergenic	ENSMUSG00000103557	ENSMUST00000194872	Gm38216	-	-
1_7949934_7950371	438	-	1_7949934_7950371	0	49	-8.3649	3.00325e-10	9.67805e-10	Down	Distal Intergenic	ENSMUSG00000103557	ENSMUST00000194872	Gm38216	-	-
1_8004451_8004717	267	1_8004451_8004717	-	26	0	8.01479	2.21221e-08	4.74092e-08	Up	Distal Intergenic	ENSMUSG00000103557	ENSMUST00000194872	Gm38216	-	-
1_8490826_8491136	311	-	1_8490826_8491136	0	22	-7.21498	8.35118e-06	1.282e-05	Down	Intron (ENSMUST00000132064/ENSMUSG00000025909, intron 6 of 19)	ENSMUSG00000025909	ENSMUST00000115484	Sntg1	syntrophin, gamma 1	4933426D16Rik|G1SYN|SYN4
1_8496648_8497258	611	-	1_8496648_8497258	0	40	-8.0731	2.01468e-08	4.43681e-08	Down	Intron (ENSMUST00000132064/ENSMUSG00000025909, intron 6 of 19)	ENSMUSG00000025909	ENSMUST00000115484	Sntg1	syntrophin, gamma 1	4933426D16Rik|G1SYN|SYN4
1_8532347_8533795	1449	1_8532593_8533493	1_8532347_8533795	58	173	-1.01243	0.000671389	0.000934585	Down	Intron (ENSMUST00000132064/ENSMUSG00000025909, intron 6 of 19)	ENSMUSG00000025909	ENSMUST00000194602	Sntg1	syntrophin, gamma 1	4933426D16Rik|G1SYN|SYN4
1_8534153_8535537	1385	1_8535224_8535537	1_8534153_8535457	42	175	-1.4937	1.87167e-06	3.07735e-06	Down	Intron (ENSMUST00000132064/ENSMUSG00000025909, intron 6 of 19)	ENSMUSG00000025909	ENSMUST00000194602	Sntg1	syntrophin, gamma 1	4933426D16Rik|G1SYN|SYN4
1_8536425_8536840	416	1_8536425_8536840	-	52	0	9.012	2.75344e-15	3.17747e-14	Up	Intron (ENSMUST00000132064/ENSMUSG00000025909, intron 6 of 19)	ENSMUSG00000025909	ENSMUST00000194602	Sntg1	syntrophin, gamma 1	4933426D16Rik|G1SYN|SYN4
1_8540901_8541221	321	-	1_8540901_8541221	0	20	-7.07845	2.86152e-05	4.18444e-05	Down	Intron (ENSMUST00000132064/ENSMUSG00000025909, intron 6 of 19)	ENSMUSG00000025909	ENSMUST00000194602	Sntg1	syntrophin, gamma 1	4933426D16Rik|G1SYN|SYN4
1_8557091_8557812	722	-	1_8557091_8557812	0	78	-9.03397	2.455e-15	2.95618e-14	Down	Intron (ENSMUST00000132064/ENSMUSG00000025909, intron 7 of 19)	ENSMUSG00000025909	ENSMUST00000194602	Sntg1	syntrophin, gamma 1	4933426D16Rik|G1SYN|SYN4
1_8558343_8559239	897	-	1_8558343_8559239	0	90	-9.24005	2.68427e-17	5.11637e-16	Down	Intron (ENSMUST00000132064/ENSMUSG00000025909, intron 7 of 19)	ENSMUSG00000025909	ENSMUST00000194602	Sntg1	syntrophin, gamma 1	4933426D16Rik|G1SYN|SYN4
1_8580373_8580814	442	-	1_8580373_8580814	0	38	-7.99939	5.909e-08	1.17873e-07	Down	Intron (ENSMUST00000132064/ENSMUSG00000025909, intron 7 of 19)	ENSMUSG00000025909	ENSMUST00000103887	Sntg1	syntrophin, gamma 1	4933426D16Rik|G1SYN|SYN4
1_8581535_8581866	332	-	1_8581535_8581866	0	26	-7.4545	1.47851e-05	2.21227e-05	Down	Intron (ENSMUST00000132064/ENSMUSG00000025909, intron 7 of 19)	ENSMUSG00000025909	ENSMUST00000103887	Sntg1	syntrophin, gamma 1	4933426D16Rik|G1SYN|SYN4
1_8745843_8746110	268	1_8745843_8746110	-	25	0	7.95843	3.94049e-08	8.10452e-08	Up	Intron (ENSMUST00000132064/ENSMUSG00000025909, intron 15 of 19)	ENSMUSG00000025909	ENSMUST00000119877	Sntg1	syntrophin, gamma 1	4933426D16Rik|G1SYN|SYN4
1_8934509_8936070	1562	1_8934552_8935108	1_8934509_8936070	47	145	-1.06075	0.000809676	0.00112303	Down	Intron (ENSMUST00000132064/ENSMUSG00000025909, intron 17 of 19)	ENSMUSG00000025909	ENSMUST00000194098	Sntg1	syntrophin, gamma 1	4933426D16Rik|G1SYN|SYN4
1_8936432_8937161	730	-	1_8936432_8937161	0	78	-9.03397	2.455e-15	2.95618e-14	Down	Intron (ENSMUST00000132064/ENSMUSG00000025909, intron 17 of 19)	ENSMUSG00000025909	ENSMUST00000194098	Sntg1	syntrophin, gamma 1	4933426D16Rik|G1SYN|SYN4
1_8937341_8937814	474	-	1_8937341_8937814	0	44	-8.21012	2.41201e-09	6.33597e-09	Down	Intron (ENSMUST00000132064/ENSMUSG00000025909, intron 17 of 19)	ENSMUSG00000025909	ENSMUST00000194098	Sntg1	syntrophin, gamma 1	4933426D16Rik|G1SYN|SYN4
1_8939488_8940616	1129	-	1_8939488_8940616	0	89	-9.22396	2.68427e-17	5.11637e-16	Down	Intron (ENSMUST00000132064/ENSMUSG00000025909, intron 17 of 19)	ENSMUSG00000025909	ENSMUST00000194098	Sntg1	syntrophin, gamma 1	4933426D16Rik|G1SYN|SYN4
1_8941022_8941572	551	-	1_8941022_8941572	0	120	-9.65449	8.93667e-21	3.79211e-19	Down	Intron (ENSMUST00000132064/ENSMUSG00000025909, intron 17 of 19)	ENSMUSG00000025909	ENSMUST00000194098	Sntg1	syntrophin, gamma 1	4933426D16Rik|G1SYN|SYN4
1_8942096_8942732	637	-	1_8942096_8942732	0	50	-8.39396	1.79489e-10	6.15694e-10	Down	Intron (ENSMUST00000132064/ENSMUSG00000025909, intron 17 of 19)	ENSMUSG00000025909	ENSMUST00000194098	Sntg1	syntrophin, gamma 1	4933426D16Rik|G1SYN|SYN4
1_9316556_9316794	239	1_9316556_9316794	-	29	0	8.17176	3.99443e-09	1.00658e-08	Up	Distal Intergenic	ENSMUSG00000025909	ENSMUST00000140302	Sntg1	syntrophin, gamma 1	4933426D16Rik|G1SYN|SYN4
1_9442733_9443106	374	-	1_9442733_9443106	0	65	-8.77148	4.48437e-13	2.89102e-12	Down	Distal Intergenic	ENSMUSG00000104428	ENSMUST00000192026	Gm18299	-	-
1_9443310_9443659	350	-	1_9443310_9443659	0	32	-7.75251	9.08175e-07	1.53104e-06	Down	Distal Intergenic	ENSMUSG00000104428	ENSMUST00000192026	Gm18299	-	-
1_9629555_9629941	387	1_9629555_9629941	-	32	0	8.31331	4.26767e-10	1.30949e-09	Up	Intron (ENSMUST00000115480/ENSMUSG00000079671, intron 4 of 4)	ENSMUSG00000079671	ENSMUST00000115480	2610203C22Rik	RIKEN cDNA 2610203C22 gene	2310007M24Rik
1_9659142_9659535	394	-	1_9659142_9659535	0	42	-8.14324	6.93678e-09	1.66011e-08	Down	Distal Intergenic	ENSMUSG00000099827	ENSMUST00000191209	Gm29520	-	-
1_9725141_9725379	239	1_9725141_9725379	-	24	0	7.89978	7.04324e-08	1.37487e-07	Up	Exon (ENSMUST00000057438/ENSMUSG00000045210, exon 3 of 3)	ENSMUSG00000045210	ENSMUST00000181821	Vcpip1	valosin containing protein (p97)/p47 complex interacting protein 1	4932442A08|5730421J18Rik|5730538E15Rik|VCIP135|mKIAA1850
1_9744112_9744386	275	1_9744112_9744386	-	33	0	8.35756	2.45934e-10	8.02848e-10	Up	Intron (ENSMUST00000057438/ENSMUSG00000045210, intron 2 of 2)	ENSMUSG00000045210	ENSMUST00000181821	Vcpip1	valosin containing protein (p97)/p47 complex interacting protein 1	4932442A08|5730421J18Rik|5730538E15Rik|VCIP135|mKIAA1850
1_9745836_9746114	279	1_9745836_9746114	-	25	0	7.95843	3.94049e-08	8.10452e-08	Up	Promoter (1-2kb)	ENSMUSG00000097893	ENSMUST00000181821	1700034P13Rik	-	-
1_9746317_9748502	2186	1_9747842_9748387	1_9746317_9748502	89	371	-1.49553	1.4384e-08	3.22069e-08	Down	Promoter (<=1kb)	ENSMUSG00000045210	ENSMUST00000057438	Vcpip1	valosin containing protein (p97)/p47 complex interacting protein 1	4932442A08|5730421J18Rik|5730538E15Rik|VCIP135|mKIAA1850
1_10035370_10036452	1083	-	1_10035370_10036452	0	74	-8.95817	9.9007e-15	1.00274e-13	Down	Promoter (1-2kb)	ENSMUSG00000025917	ENSMUST00000190155	Cops5	COP9 signalosome subunit 5	AI303502|CSN5|Jab1|Mov34|Sgn5
1_10036921_10040105	3185	1_10037379_10039199	1_10036921_10040105	368	1227	-1.17418	1.48425e-07	2.84142e-07	Down	Promoter (<=1kb)	ENSMUSG00000025917	ENSMUST00000027050	Cops5	COP9 signalosome subunit 5	AI303502|CSN5|Jab1|Mov34|Sgn5
1_10097102_10097622	521	-	1_10097102_10097622	0	35	-7.88122	1.75007e-07	3.29918e-07	Down	Intron (ENSMUST00000071087/ENSMUSG00000056763, intron 16 of 29)	ENSMUSG00000056763	ENSMUST00000185422	Cspp1	centrosome and spindle pole associated protein 1	2310020J12Rik|4930413O22Rik|AA387550|BC055915|Cspp2|Cspp3
1_10133830_10134124	295	1_10133830_10134124	-	34	0	8.4005	1.42164e-10	4.99774e-10	Up	Promoter (<=1kb)	ENSMUSG00000056763	ENSMUST00000148663	Cspp1	centrosome and spindle pole associated protein 1	2310020J12Rik|4930413O22Rik|AA387550|BC055915|Cspp2|Cspp3
1_10219976_10220214	239	1_10219976_10220214	-	26	0	8.01479	2.21221e-08	4.74092e-08	Up	Intron (ENSMUST00000088615/ENSMUSG00000067851, intron 37 of 37)	ENSMUSG00000067851	ENSMUST00000186720	Arfgef1	ADP-ribosylation factor guanine nucleotide-exchange factor 1(brefeldin A-inhibited)	ARFGEP1|BIG1|D130059B05Rik|D730028O18Rik|P200
1_10225831_10226108	278	1_10225831_10226108	-	28	0	8.12131	7.04361e-09	1.66011e-08	Up	Intron (ENSMUST00000088615/ENSMUSG00000067851, intron 37 of 37)	ENSMUSG00000067851	ENSMUST00000088615	Arfgef1	ADP-ribosylation factor guanine nucleotide-exchange factor 1(brefeldin A-inhibited)	ARFGEP1|BIG1|D130059B05Rik|D730028O18Rik|P200
1_10256539_10256924	386	1_10256539_10256924	-	49	0	8.92644	1.20778e-14	1.17285e-13	Up	Distal Intergenic	ENSMUSG00000067851	ENSMUST00000088615	Arfgef1	ADP-ribosylation factor guanine nucleotide-exchange factor 1(brefeldin A-inhibited)	ARFGEP1|BIG1|D130059B05Rik|D730028O18Rik|P200
1_10347801_10348347	547	-	1_10347801_10348347	0	49	-8.3649	3.00325e-10	9.67805e-10	Down	Intron (ENSMUST00000153695/ENSMUSG00000042501, intron 3 of 9)	ENSMUSG00000042501	ENSMUST00000194845	Cpa6	carboxypeptidase A6	9030616D13Rik
1_10348698_10349199	502	1_10348699_10349199	1_10348698_10349192	85	55	1.18879	0.00030684	0.000433029	Up	Intron (ENSMUST00000153695/ENSMUSG00000042501, intron 3 of 9)	ENSMUSG00000042501	ENSMUST00000194845	Cpa6	carboxypeptidase A6	9030616D13Rik
1_10596815_10597072	258	1_10596815_10597072	-	33	0	8.35756	2.45934e-10	8.02848e-10	Up	Intron (ENSMUST00000153695/ENSMUSG00000042501, intron 9 of 9)	ENSMUSG00000042501	ENSMUST00000179958	Cpa6	carboxypeptidase A6	9030616D13Rik
1_10649737_10650311	575	1_10649737_10650311	-	49	0	8.92644	1.20778e-14	1.17285e-13	Up	Intron (ENSMUST00000153695/ENSMUSG00000042501, intron 9 of 9)	ENSMUSG00000042501	ENSMUST00000119252	Cpa6	carboxypeptidase A6	9030616D13Rik
1_10813922_10814272	351	1_10813922_10814272	-	34	0	8.4005	1.42164e-10	4.99774e-10	Up	Distal Intergenic	ENSMUSG00000100212	ENSMUST00000189483	Gm5522	-	-
1_10822359_10822627	269	1_10822359_10822627	-	36	0	8.48273	4.79413e-11	1.90587e-10	Up	Distal Intergenic	ENSMUSG00000100212	ENSMUST00000189483	Gm5522	-	-
1_10824805_10825249	445	-	1_10824805_10825249	0	33	-7.79671	5.23325e-07	9.17763e-07	Down	Distal Intergenic	ENSMUSG00000100212	ENSMUST00000189483	Gm5522	-	-
1_10829102_10829577	476	-	1_10829102_10829577	0	44	-8.21012	2.41201e-09	6.33597e-09	Down	Distal Intergenic	ENSMUSG00000100212	ENSMUST00000189483	Gm5522	-	-
1_10830009_10830466	458	-	1_10830009_10830466	0	36	-7.9217	1.01568e-07	1.94955e-07	Down	Distal Intergenic	ENSMUSG00000100212	ENSMUST00000189483	Gm5522	-	-
1_10839341_10839648	308	1_10839341_10839648	-	42	0	8.70454	1.17118e-12	7.07889e-12	Up	Distal Intergenic	ENSMUSG00000100648	ENSMUST00000188013	Gm28659	-	-
1_10845657_10845962	306	1_10845657_10845962	-	39	0	8.59789	5.64977e-12	2.78967e-11	Up	Distal Intergenic	ENSMUSG00000100648	ENSMUST00000188013	Gm28659	-	-
1_10847940_10848408	469	1_10847940_10848408	-	39	0	8.59789	5.64977e-12	2.78967e-11	Up	Distal Intergenic	ENSMUSG00000100648	ENSMUST00000188013	Gm28659	-	-
1_10850097_10850437	341	1_10850097_10850437	-	42	0	8.70454	1.17118e-12	7.07889e-12	Up	Distal Intergenic	ENSMUSG00000100648	ENSMUST00000188013	Gm28659	-	-
1_10863499_10863837	339	-	1_10863499_10863837	0	36	-7.9217	1.01568e-07	1.94955e-07	Down	Distal Intergenic	ENSMUSG00000100648	ENSMUST00000188013	Gm28659	-	-
1_10866991_10867403	413	-	1_10866991_10867403	0	24	-7.33971	2.47519e-06	4.01712e-06	Down	Promoter (1-2kb)	ENSMUSG00000100648	ENSMUST00000188013	Gm28659	-	-
1_10868746_10869154	409	1_10868746_10869154	-	54	0	9.06635	1.04021e-15	1.33762e-14	Up	Promoter (<=1kb)	ENSMUSG00000100648	ENSMUST00000188013	Gm28659	-	-
1_10869705_10870078	374	1_10869705_10870078	-	36	0	8.48273	4.79413e-11	1.90587e-10	Up	Downstream (<1kb)	ENSMUSG00000100648	ENSMUST00000188013	Gm28659	-	-
1_10871130_10871436	307	1_10871130_10871436	-	53	0	9.03943	1.69034e-15	2.06502e-14	Up	Downstream (1-2kb)	ENSMUSG00000100648	ENSMUST00000188013	Gm28659	-	-
1_10896843_10897144	302	1_10896843_10897144	-	34	0	8.4005	1.42164e-10	4.99774e-10	Up	Distal Intergenic	ENSMUSG00000088585	ENSMUST00000157960	Gm22963	-	-
1_10898724_10899635	912	1_10898724_10899635	-	78	0	9.59603	2.07007e-21	1.00969e-19	Up	Distal Intergenic	ENSMUSG00000088585	ENSMUST00000157960	Gm22963	-	-
1_10900851_10901148	298	1_10900851_10901148	-	35	0	8.4422	8.24314e-11	3.08621e-10	Up	Distal Intergenic	ENSMUSG00000088585	ENSMUST00000157960	Gm22963	-	-
1_10925763_10926122	360	-	1_10925763_10926122	0	29	-7.61119	2.75402e-06	4.40215e-06	Down	Distal Intergenic	ENSMUSG00000088585	ENSMUST00000157960	Gm22963	-	-
1_10932788_10934216	1429	1_10932829_10934216	1_10932788_10933638	131	66	1.54984	2.07591e-07	3.90786e-07	Up	Distal Intergenic	ENSMUSG00000088585	ENSMUST00000157960	Gm22963	-	-
1_10989675_10989957	283	1_10989675_10989957	-	22	0	7.7748	4.1078e-07	7.32295e-07	Up	Distal Intergenic	ENSMUSG00000048960	ENSMUST00000027056	Prex2	phosphatidylinositol-3,4,5-trisphosphate-dependent Rac exchange factor 2	6230420N16Rik|AI316880|AI553603|C030045D06Rik|D430013K02|Depdc2|P-Rex2
1_10991829_10992071	243	1_10991829_10992071	-	22	0	7.7748	4.1078e-07	7.32295e-07	Up	Promoter (1-2kb)	ENSMUSG00000048960	ENSMUST00000027056	Prex2	phosphatidylinositol-3,4,5-trisphosphate-dependent Rac exchange factor 2	6230420N16Rik|AI316880|AI553603|C030045D06Rik|D430013K02|Depdc2|P-Rex2
1_10995811_10996388	578	1_10995811_10996388	-	59	0	9.19387	5.93548e-17	1.01453e-15	Up	Exon (ENSMUST00000190935/ENSMUSG00000048960, exon 1 of 1)	ENSMUSG00000048960	ENSMUST00000190935	Prex2	phosphatidylinositol-3,4,5-trisphosphate-dependent Rac exchange factor 2	6230420N16Rik|AI316880|AI553603|C030045D06Rik|D430013K02|Depdc2|P-Rex2
1_10996719_10997320	602	1_10996719_10997320	1_10997007_10997317	57	38	1.14482	0.00186291	0.00253765	Up	Intron (ENSMUST00000027056/ENSMUSG00000048960, intron 1 of 39)	ENSMUSG00000048960	ENSMUST00000190935	Prex2	phosphatidylinositol-3,4,5-trisphosphate-dependent Rac exchange factor 2	6230420N16Rik|AI316880|AI553603|C030045D06Rik|D430013K02|Depdc2|P-Rex2
1_10998073_10998492	420	-	1_10998073_10998492	0	39	-8.03672	3.4461e-08	7.26383e-08	Down	Intron (ENSMUST00000027056/ENSMUSG00000048960, intron 1 of 39)	ENSMUSG00000048960	ENSMUST00000190935	Prex2	phosphatidylinositol-3,4,5-trisphosphate-dependent Rac exchange factor 2	6230420N16Rik|AI316880|AI553603|C030045D06Rik|D430013K02|Depdc2|P-Rex2
1_10998820_10999291	472	1_10998820_10999291	1_10998871_10999243	76	41	1.45001	2.88385e-05	4.21608e-05	Up	Intron (ENSMUST00000027056/ENSMUSG00000048960, intron 1 of 39)	ENSMUSG00000048960	ENSMUST00000190935	Prex2	phosphatidylinositol-3,4,5-trisphosphate-dependent Rac exchange factor 2	6230420N16Rik|AI316880|AI553603|C030045D06Rik|D430013K02|Depdc2|P-Rex2
1_11000653_11000917	265	1_11000653_11000917	-	27	0	8.06903	1.24618e-08	2.79243e-08	Up	Intron (ENSMUST00000027056/ENSMUSG00000048960, intron 1 of 39)	ENSMUSG00000048960	ENSMUST00000190935	Prex2	phosphatidylinositol-3,4,5-trisphosphate-dependent Rac exchange factor 2	6230420N16Rik|AI316880|AI553603|C030045D06Rik|D430013K02|Depdc2|P-Rex2
1_11002062_11003017	956	1_11002062_11003017	1_11002091_11002618	80	33	1.83581	3.53998e-07	6.44113e-07	Up	Intron (ENSMUST00000027056/ENSMUSG00000048960, intron 1 of 39)	ENSMUSG00000048960	ENSMUST00000190935	Prex2	phosphatidylinositol-3,4,5-trisphosphate-dependent Rac exchange factor 2	6230420N16Rik|AI316880|AI553603|C030045D06Rik|D430013K02|Depdc2|P-Rex2
1_11003132_11003652	521	-	1_11003132_11003652	0	31	-7.70693	9.08175e-07	1.53104e-06	Down	Intron (ENSMUST00000027056/ENSMUSG00000048960, intron 1 of 39)	ENSMUSG00000048960	ENSMUST00000190935	Prex2	phosphatidylinositol-3,4,5-trisphosphate-dependent Rac exchange factor 2	6230420N16Rik|AI316880|AI553603|C030045D06Rik|D430013K02|Depdc2|P-Rex2
1_11013639_11014093	455	1_11013639_11014093	-	54	0	9.06635	1.04021e-15	1.33762e-14	Up	Intron (ENSMUST00000027056/ENSMUSG00000048960, intron 1 of 39)	ENSMUSG00000048960	ENSMUST00000190935	Prex2	phosphatidylinositol-3,4,5-trisphosphate-dependent Rac exchange factor 2	6230420N16Rik|AI316880|AI553603|C030045D06Rik|D430013K02|Depdc2|P-Rex2
1_11024499_11025091	593	1_11024499_11025091	-	50	0	8.95553	7.35991e-15	7.54998e-14	Up	Intron (ENSMUST00000027056/ENSMUSG00000048960, intron 1 of 39)	ENSMUSG00000048960	ENSMUST00000190935	Prex2	phosphatidylinositol-3,4,5-trisphosphate-dependent Rac exchange factor 2	6230420N16Rik|AI316880|AI553603|C030045D06Rik|D430013K02|Depdc2|P-Rex2
1_11025887_11026132	246	1_11025887_11026132	-	30	0	8.2205	1.29729e-09	3.54454e-09	Up	Intron (ENSMUST00000027056/ENSMUSG00000048960, intron 1 of 39)	ENSMUSG00000048960	ENSMUST00000190935	Prex2	phosphatidylinositol-3,4,5-trisphosphate-dependent Rac exchange factor 2	6230420N16Rik|AI316880|AI553603|C030045D06Rik|D430013K02|Depdc2|P-Rex2
1_11026677_11026921	245	1_11026677_11026921	-	42	0	8.70454	1.17118e-12	7.07889e-12	Up	Intron (ENSMUST00000027056/ENSMUSG00000048960, intron 1 of 39)	ENSMUSG00000048960	ENSMUST00000190935	Prex2	phosphatidylinositol-3,4,5-trisphosphate-dependent Rac exchange factor 2	6230420N16Rik|AI316880|AI553603|C030045D06Rik|D430013K02|Depdc2|P-Rex2
1_11027161_11028022	862	1_11027161_11028022	-	67	0	9.37702	5.99836e-19	1.69838e-17	Up	Intron (ENSMUST00000027056/ENSMUSG00000048960, intron 1 of 39)	ENSMUSG00000048960	ENSMUST00000190935	Prex2	phosphatidylinositol-3,4,5-trisphosphate-dependent Rac exchange factor 2	6230420N16Rik|AI316880|AI553603|C030045D06Rik|D430013K02|Depdc2|P-Rex2
1_11028585_11028834	250	1_11028585_11028834	-	21	0	7.708	4.1078e-07	7.32295e-07	Up	Intron (ENSMUST00000027056/ENSMUSG00000048960, intron 1 of 39)	ENSMUSG00000048960	ENSMUST00000190935	Prex2	phosphatidylinositol-3,4,5-trisphosphate-dependent Rac exchange factor 2	6230420N16Rik|AI316880|AI553603|C030045D06Rik|D430013K02|Depdc2|P-Rex2
1_11034732_11035031	300	1_11034732_11035031	-	38	0	8.56052	9.60067e-12	4.38615e-11	Up	Intron (ENSMUST00000027056/ENSMUSG00000048960, intron 1 of 39)	ENSMUSG00000048960	ENSMUST00000190935	Prex2	phosphatidylinositol-3,4,5-trisphosphate-dependent Rac exchange factor 2	6230420N16Rik|AI316880|AI553603|C030045D06Rik|D430013K02|Depdc2|P-Rex2
1_11045037_11045275	239	1_11045037_11045275	-	27	0	8.06903	1.24618e-08	2.79243e-08	Up	Intron (ENSMUST00000027056/ENSMUSG00000048960, intron 1 of 39)	ENSMUSG00000048960	ENSMUST00000190935	Prex2	phosphatidylinositol-3,4,5-trisphosphate-dependent Rac exchange factor 2	6230420N16Rik|AI316880|AI553603|C030045D06Rik|D430013K02|Depdc2|P-Rex2
1_11052419_11053388	970	1_11052419_11053388	-	93	0	9.84949	2.93906e-24	2.64341e-22	Up	Intron (ENSMUST00000027056/ENSMUSG00000048960, intron 1 of 39)	ENSMUSG00000048960	ENSMUST00000189822	Prex2	phosphatidylinositol-3,4,5-trisphosphate-dependent Rac exchange factor 2	6230420N16Rik|AI316880|AI553603|C030045D06Rik|D430013K02|Depdc2|P-Rex2
1_11054476_11054879	404	-	1_11054476_11054879	0	45	-8.24243	2.41201e-09	6.33597e-09	Down	Intron (ENSMUST00000027056/ENSMUSG00000048960, intron 1 of 39)	ENSMUSG00000048960	ENSMUST00000189822	Prex2	phosphatidylinositol-3,4,5-trisphosphate-dependent Rac exchange factor 2	6230420N16Rik|AI316880|AI553603|C030045D06Rik|D430013K02|Depdc2|P-Rex2
1_11055183_11056022	840	-	1_11055183_11056022	0	63	-8.7265	7.2951e-13	4.64356e-12	Down	Intron (ENSMUST00000027056/ENSMUSG00000048960, intron 1 of 39)	ENSMUSG00000048960	ENSMUST00000189822	Prex2	phosphatidylinositol-3,4,5-trisphosphate-dependent Rac exchange factor 2	6230420N16Rik|AI316880|AI553603|C030045D06Rik|D430013K02|Depdc2|P-Rex2
1_11056690_11056973	284	1_11056690_11056973	-	30	0	8.2205	1.29729e-09	3.54454e-09	Up	Intron (ENSMUST00000027056/ENSMUSG00000048960, intron 1 of 39)	ENSMUSG00000048960	ENSMUST00000189822	Prex2	phosphatidylinositol-3,4,5-trisphosphate-dependent Rac exchange factor 2	6230420N16Rik|AI316880|AI553603|C030045D06Rik|D430013K02|Depdc2|P-Rex2
1_11057688_11059401	1714	1_11057688_11059351	1_11057689_11058192;1_11058479_11059401	134	97	1.028	0.000269813	0.000381558	Up	Intron (ENSMUST00000027056/ENSMUSG00000048960, intron 1 of 39)	ENSMUSG00000048960	ENSMUST00000189822	Prex2	phosphatidylinositol-3,4,5-trisphosphate-dependent Rac exchange factor 2	6230420N16Rik|AI316880|AI553603|C030045D06Rik|D430013K02|Depdc2|P-Rex2
1_11060186_11060792	607	1_11060186_11060792	-	56	0	9.11872	2.45896e-16	3.62401e-15	Up	Intron (ENSMUST00000027056/ENSMUSG00000048960, intron 1 of 39)	ENSMUSG00000048960	ENSMUST00000189822	Prex2	phosphatidylinositol-3,4,5-trisphosphate-dependent Rac exchange factor 2	6230420N16Rik|AI316880|AI553603|C030045D06Rik|D430013K02|Depdc2|P-Rex2
1_11061009_11061564	556	1_11061009_11061564	-	56	0	9.11872	2.45896e-16	3.62401e-15	Up	Exon (ENSMUST00000027056/ENSMUSG00000048960, exon 2 of 40)	ENSMUSG00000048960	ENSMUST00000189822	Prex2	phosphatidylinositol-3,4,5-trisphosphate-dependent Rac exchange factor 2	6230420N16Rik|AI316880|AI553603|C030045D06Rik|D430013K02|Depdc2|P-Rex2
1_11081491_11082045	555	1_11081491_11082045	-	55	0	9.09277	3.96752e-16	5.44693e-15	Up	Intron (ENSMUST00000027056/ENSMUSG00000048960, intron 5 of 39)	ENSMUSG00000048960	ENSMUST00000189822	Prex2	phosphatidylinositol-3,4,5-trisphosphate-dependent Rac exchange factor 2	6230420N16Rik|AI316880|AI553603|C030045D06Rik|D430013K02|Depdc2|P-Rex2
1_11086803_11087350	548	1_11086803_11087350	-	70	0	9.44013	1.57453e-19	5.08953e-18	Up	Intron (ENSMUST00000027056/ENSMUSG00000048960, intron 5 of 39)	ENSMUSG00000048960	ENSMUST00000189822	Prex2	phosphatidylinositol-3,4,5-trisphosphate-dependent Rac exchange factor 2	6230420N16Rik|AI316880|AI553603|C030045D06Rik|D430013K02|Depdc2|P-Rex2
1_11088277_11088765	489	-	1_11088277_11088765	0	46	-8.27404	1.42755e-09	3.85364e-09	Down	Intron (ENSMUST00000027056/ENSMUSG00000048960, intron 5 of 39)	ENSMUSG00000048960	ENSMUST00000189822	Prex2	phosphatidylinositol-3,4,5-trisphosphate-dependent Rac exchange factor 2	6230420N16Rik|AI316880|AI553603|C030045D06Rik|D430013K02|Depdc2|P-Rex2
1_11093882_11094399	518	1_11093882_11094399	-	45	0	8.80385	1.49345e-13	1.11491e-12	Up	Intron (ENSMUST00000027056/ENSMUSG00000048960, intron 6 of 39)	ENSMUSG00000048960	ENSMUST00000189822	Prex2	phosphatidylinositol-3,4,5-trisphosphate-dependent Rac exchange factor 2	6230420N16Rik|AI316880|AI553603|C030045D06Rik|D430013K02|Depdc2|P-Rex2
1_11097275_11097607	333	1_11097275_11097607	-	29	0	8.17176	3.99443e-09	1.00658e-08	Up	Promoter (<=1kb)	ENSMUSG00000048960	ENSMUST00000189822	Prex2	phosphatidylinositol-3,4,5-trisphosphate-dependent Rac exchange factor 2	6230420N16Rik|AI316880|AI553603|C030045D06Rik|D430013K02|Depdc2|P-Rex2
1_11099733_11099998	266	1_11099733_11099998	-	24	0	7.89978	7.04324e-08	1.37487e-07	Up	Intron (ENSMUST00000027056/ENSMUSG00000048960, intron 7 of 39)	ENSMUSG00000048960	ENSMUST00000189822	Prex2	phosphatidylinositol-3,4,5-trisphosphate-dependent Rac exchange factor 2	6230420N16Rik|AI316880|AI553603|C030045D06Rik|D430013K02|Depdc2|P-Rex2
1_11108292_11108815	524	1_11108292_11108815	-	55	0	9.09277	3.96752e-16	5.44693e-15	Up	Intron (ENSMUST00000027056/ENSMUSG00000048960, intron 9 of 39)	ENSMUSG00000048960	ENSMUST00000189822	Prex2	phosphatidylinositol-3,4,5-trisphosphate-dependent Rac exchange factor 2	6230420N16Rik|AI316880|AI553603|C030045D06Rik|D430013K02|Depdc2|P-Rex2
1_11112829_11113500	672	1_11112829_11113500	-	97	0	9.91018	4.12804e-25	4.32913e-23	Up	Exon (ENSMUST00000027056/ENSMUSG00000048960, exon 11 of 40)	ENSMUSG00000048960	ENSMUST00000189822	Prex2	phosphatidylinositol-3,4,5-trisphosphate-dependent Rac exchange factor 2	6230420N16Rik|AI316880|AI553603|C030045D06Rik|D430013K02|Depdc2|P-Rex2
1_11115879_11116148	270	1_11115879_11116148	-	33	0	8.35756	2.45934e-10	8.02848e-10	Up	Intron (ENSMUST00000027056/ENSMUSG00000048960, intron 11 of 39)	ENSMUSG00000048960	ENSMUST00000189822	Prex2	phosphatidylinositol-3,4,5-trisphosphate-dependent Rac exchange factor 2	6230420N16Rik|AI316880|AI553603|C030045D06Rik|D430013K02|Depdc2|P-Rex2
1_11120298_11120914	617	1_11120298_11120914	-	58	0	9.16925	9.51107e-17	1.54796e-15	Up	Intron (ENSMUST00000027056/ENSMUSG00000048960, intron 11 of 39)	ENSMUSG00000048960	ENSMUST00000104130	Prex2	phosphatidylinositol-3,4,5-trisphosphate-dependent Rac exchange factor 2	6230420N16Rik|AI316880|AI553603|C030045D06Rik|D430013K02|Depdc2|P-Rex2
1_11138280_11138656	377	1_11138280_11138656	-	40	0	8.63433	3.33429e-12	1.75371e-11	Up	Intron (ENSMUST00000027056/ENSMUSG00000048960, intron 15 of 39)	ENSMUSG00000048960	ENSMUST00000187694	Prex2	phosphatidylinositol-3,4,5-trisphosphate-dependent Rac exchange factor 2	6230420N16Rik|AI316880|AI553603|C030045D06Rik|D430013K02|Depdc2|P-Rex2
1_11141534_11142071	538	-	1_11141534_11142071	0	33	-7.79671	5.23325e-07	9.17763e-07	Down	Exon (ENSMUST00000187694/ENSMUSG00000048960, exon 1 of 5)	ENSMUSG00000048960	ENSMUST00000187694	Prex2	phosphatidylinositol-3,4,5-trisphosphate-dependent Rac exchange factor 2	6230420N16Rik|AI316880|AI553603|C030045D06Rik|D430013K02|Depdc2|P-Rex2
1_11144595_11144870	276	1_11144595_11144870	-	31	0	8.26765	7.42892e-10	2.14936e-09	Up	Intron (ENSMUST00000027056/ENSMUSG00000048960, intron 18 of 39)	ENSMUSG00000048960	ENSMUST00000187694	Prex2	phosphatidylinositol-3,4,5-trisphosphate-dependent Rac exchange factor 2	6230420N16Rik|AI316880|AI553603|C030045D06Rik|D430013K02|Depdc2|P-Rex2
1_11147743_11150442	2700	1_11147743_11149420;1_11149894_11150442	1_11148041_11148420;1_11149027_11150311	236	157	1.15023	6.30093e-06	9.79221e-06	Up	Exon (ENSMUST00000027056/ENSMUSG00000048960, exon 19 of 40)	ENSMUSG00000048960	ENSMUST00000187694	Prex2	phosphatidylinositol-3,4,5-trisphosphate-dependent Rac exchange factor 2	6230420N16Rik|AI316880|AI553603|C030045D06Rik|D430013K02|Depdc2|P-Rex2
1_11183437_11183675	239	1_11183437_11183675	-	26	0	8.01479	2.21221e-08	4.74092e-08	Up	Intron (ENSMUST00000027056/ENSMUSG00000048960, intron 26 of 39)	ENSMUSG00000048960	ENSMUST00000187404	Prex2	phosphatidylinositol-3,4,5-trisphosphate-dependent Rac exchange factor 2	6230420N16Rik|AI316880|AI553603|C030045D06Rik|D430013K02|Depdc2|P-Rex2
1_11211931_11212173	243	1_11211931_11212173	-	23	0	7.83864	2.27396e-07	4.21299e-07	Up	Intron (ENSMUST00000027056/ENSMUSG00000048960, intron 34 of 39)	ENSMUSG00000048960	ENSMUST00000187404	Prex2	phosphatidylinositol-3,4,5-trisphosphate-dependent Rac exchange factor 2	6230420N16Rik|AI316880|AI553603|C030045D06Rik|D430013K02|Depdc2|P-Rex2
1_11227911_11228149	239	1_11227911_11228149	-	28	0	8.12131	7.04361e-09	1.66011e-08	Up	Intron (ENSMUST00000027056/ENSMUSG00000048960, intron 34 of 39)	ENSMUSG00000048960	ENSMUST00000187404	Prex2	phosphatidylinositol-3,4,5-trisphosphate-dependent Rac exchange factor 2	6230420N16Rik|AI316880|AI553603|C030045D06Rik|D430013K02|Depdc2|P-Rex2
1_11231537_11231918	382	1_11231537_11231918	-	35	0	8.4422	8.24314e-11	3.08621e-10	Up	Exon (ENSMUST00000027056/ENSMUSG00000048960, exon 35 of 40)	ENSMUSG00000048960	ENSMUST00000187404	Prex2	phosphatidylinositol-3,4,5-trisphosphate-dependent Rac exchange factor 2	6230420N16Rik|AI316880|AI553603|C030045D06Rik|D430013K02|Depdc2|P-Rex2
1_11238206_11238633	428	-	1_11238206_11238633	0	29	-7.61119	2.75402e-06	4.40215e-06	Down	Intron (ENSMUST00000027056/ENSMUSG00000048960, intron 35 of 39)	ENSMUSG00000048960	ENSMUST00000187404	Prex2	phosphatidylinositol-3,4,5-trisphosphate-dependent Rac exchange factor 2	6230420N16Rik|AI316880|AI553603|C030045D06Rik|D430013K02|Depdc2|P-Rex2
1_11240019_11240268	250	1_11240019_11240268	-	34	0	8.4005	1.42164e-10	4.99774e-10	Up	Intron (ENSMUST00000027056/ENSMUSG00000048960, intron 35 of 39)	ENSMUSG00000048960	ENSMUST00000187404	Prex2	phosphatidylinositol-3,4,5-trisphosphate-dependent Rac exchange factor 2	6230420N16Rik|AI316880|AI553603|C030045D06Rik|D430013K02|Depdc2|P-Rex2
1_11275191_11275882	692	-	1_11275191_11275882	0	59	-8.63209	5.22709e-12	2.71383e-11	Down	Intron (ENSMUST00000027056/ENSMUSG00000048960, intron 37 of 39)	ENSMUSG00000048960	ENSMUST00000188154	Prex2	phosphatidylinositol-3,4,5-trisphosphate-dependent Rac exchange factor 2	6230420N16Rik|AI316880|AI553603|C030045D06Rik|D430013K02|Depdc2|P-Rex2
1_11314063_11314457	395	1_11314063_11314457	-	37	0	8.52215	1.63617e-11	7.0045e-11	Up	Distal Intergenic	ENSMUSG00000048960	ENSMUST00000188154	Prex2	phosphatidylinositol-3,4,5-trisphosphate-dependent Rac exchange factor 2	6230420N16Rik|AI316880|AI553603|C030045D06Rik|D430013K02|Depdc2|P-Rex2
1_11317148_11317516	369	-	1_11317148_11317516	0	26	-7.4545	1.47851e-05	2.21227e-05	Down	Distal Intergenic	ENSMUSG00000048960	ENSMUST00000188154	Prex2	phosphatidylinositol-3,4,5-trisphosphate-dependent Rac exchange factor 2	6230420N16Rik|AI316880|AI553603|C030045D06Rik|D430013K02|Depdc2|P-Rex2
1_11326535_11327035	501	-	1_11326535_11327035	0	41	-8.1086	1.18072e-08	2.73413e-08	Down	Distal Intergenic	ENSMUSG00000103494	ENSMUST00000193623	Gm37410	-	-
1_11334270_11334683	414	-	1_11334270_11334683	0	54	-8.50467	3.88735e-11	1.62113e-10	Down	Distal Intergenic	ENSMUSG00000103494	ENSMUST00000193623	Gm37410	-	-
1_11335538_11335862	325	-	1_11335538_11335862	0	24	-7.33971	2.47519e-06	4.01712e-06	Down	Distal Intergenic	ENSMUSG00000103494	ENSMUST00000193623	Gm37410	-	-
1_11337443_11338900	1458	-	1_11337443_11338900	0	96	-9.33301	3.00402e-17	5.62136e-16	Down	Distal Intergenic	ENSMUSG00000103494	ENSMUST00000193623	Gm37410	-	-
1_11339799_11341053	1255	1_11340223_11340625	1_11339799_11341053	35	111	-1.09996	0.00134041	0.0018399	Down	Distal Intergenic	ENSMUSG00000103494	ENSMUST00000193623	Gm37410	-	-
1_11341377_11341749	373	-	1_11341377_11341749	0	38	-7.99939	5.909e-08	1.17873e-07	Down	Distal Intergenic	ENSMUSG00000103494	ENSMUST00000193623	Gm37410	-	-
1_11357061_11357299	239	1_11357061_11357299	-	30	0	8.2205	1.29729e-09	3.54454e-09	Up	Distal Intergenic	ENSMUSG00000103494	ENSMUST00000193623	Gm37410	-	-
1_11389475_11389869	395	1_11389475_11389869	-	27	0	8.06903	1.24618e-08	2.79243e-08	Up	Distal Intergenic	ENSMUSG00000103494	ENSMUST00000193623	Gm37410	-	-
1_11391341_11392330	990	1_11391341_11392330	-	77	0	9.57744	4.84905e-21	2.2224e-19	Up	Distal Intergenic	ENSMUSG00000057715	ENSMUST00000171690	A830018L16Rik	RIKEN cDNA A830018L16 gene	-
1_11399150_11399477	328	-	1_11399150_11399477	0	31	-7.70693	9.08175e-07	1.53104e-06	Down	Distal Intergenic	ENSMUSG00000057715	ENSMUST00000171690	A830018L16Rik	RIKEN cDNA A830018L16 gene	-
1_11401293_11401768	476	-	1_11401293_11401768	0	38	-7.99939	5.909e-08	1.17873e-07	Down	Distal Intergenic	ENSMUSG00000057715	ENSMUST00000171690	A830018L16Rik	RIKEN cDNA A830018L16 gene	-
1_11412757_11414562	1806	-	1_11412757_11414562	0	189	-10.3092	1.62092e-29	3.72096e-27	Down	Promoter (<=1kb)	ENSMUSG00000057715	ENSMUST00000171690	A830018L16Rik	RIKEN cDNA A830018L16 gene	-
1_11460581_11461107	527	-	1_11460581_11461107	0	37	-7.96106	5.909e-08	1.17873e-07	Down	Intron (ENSMUST00000171690/ENSMUSG00000057715, intron 1 of 7)	ENSMUSG00000057715	ENSMUST00000194502	A830018L16Rik	RIKEN cDNA A830018L16 gene	-
1_11461235_11461474	240	1_11461235_11461474	-	25	0	7.95843	3.94049e-08	8.10452e-08	Up	Intron (ENSMUST00000171690/ENSMUSG00000057715, intron 1 of 7)	ENSMUSG00000057715	ENSMUST00000194502	A830018L16Rik	RIKEN cDNA A830018L16 gene	-
1_11466768_11467415	648	1_11466825_11467415	1_11466768_11467104	66	40	1.28226	0.000438362	0.00061463	Up	Intron (ENSMUST00000171690/ENSMUSG00000057715, intron 1 of 7)	ENSMUSG00000057715	ENSMUST00000194502	A830018L16Rik	RIKEN cDNA A830018L16 gene	-
1_11565001_11565251	251	1_11565001_11565251	-	28	0	8.12131	7.04361e-09	1.66011e-08	Up	Intron (ENSMUST00000171690/ENSMUSG00000057715, intron 5 of 7)	ENSMUSG00000057715	ENSMUST00000191437	A830018L16Rik	RIKEN cDNA A830018L16 gene	-
1_11746027_11747251	1225	-	1_11746027_11747251	0	99	-9.37734	1.29533e-17	2.66172e-16	Down	Intron (ENSMUST00000048613/ENSMUSG00000057715, intron 7 of 13)	ENSMUSG00000057715	ENSMUST00000195360	A830018L16Rik	RIKEN cDNA A830018L16 gene	-
1_11747459_11748621	1163	1_11748292_11748621	1_11747459_11748556	46	190	-1.48131	1.41541e-06	2.36961e-06	Down	3' UTR	ENSMUSG00000103561	ENSMUST00000195360	Gm38069	-	-
1_11900504_11900835	332	-	1_11900504_11900835	0	22	-7.21498	8.35118e-06	1.282e-05	Down	Intron (ENSMUST00000048613/ENSMUSG00000057715, intron 10 of 13)	ENSMUSG00000057715	ENSMUST00000195360	A830018L16Rik	RIKEN cDNA A830018L16 gene	-
1_11924595_11924928	334	-	1_11924595_11924928	0	30	-7.65985	1.5797e-06	2.60196e-06	Down	Intron (ENSMUST00000048613/ENSMUSG00000057715, intron 10 of 13)	ENSMUSG00000057715	ENSMUST00000187748	A830018L16Rik	RIKEN cDNA A830018L16 gene	-
1_11988435_11988725	291	1_11988435_11988725	-	32	0	8.31331	4.26767e-10	1.30949e-09	Up	Distal Intergenic	ENSMUSG00000101610	ENSMUST00000187748	Gm7560	-	-
1_12006338_12006613	276	1_12006338_12006613	-	21	0	7.708	4.1078e-07	7.32295e-07	Up	Distal Intergenic	ENSMUSG00000101610	ENSMUST00000187748	Gm7560	-	-
1_12024052_12024357	306	1_12024052_12024357	-	30	0	8.2205	1.29729e-09	3.54454e-09	Up	Distal Intergenic	ENSMUSG00000101610	ENSMUST00000187748	Gm7560	-	-
1_12024770_12025886	1117	1_12025574_12025886	1_12024770_12025886	36	108	-1.01996	0.00304304	0.00409724	Down	Distal Intergenic	ENSMUSG00000101610	ENSMUST00000187748	Gm7560	-	-
1_12026260_12027549	1290	1_12026389_12027549	1_12026260_12026948	116	70	1.28984	1.81295e-05	2.69559e-05	Up	Distal Intergenic	ENSMUSG00000101610	ENSMUST00000187748	Gm7560	-	-
1_12054154_12054638	485	1_12054154_12054638	-	39	0	8.59789	5.64977e-12	2.78967e-11	Up	Distal Intergenic	ENSMUSG00000101610	ENSMUST00000187748	Gm7560	-	-
1_12056707_12056998	292	1_12056707_12056998	-	20	0	7.63795	7.44748e-07	1.2962e-06	Up	Distal Intergenic	ENSMUSG00000101610	ENSMUST00000187748	Gm7560	-	-
1_12060521_12061247	727	-	1_12060521_12061247	0	62	-8.70347	1.18945e-12	7.10233e-12	Down	Distal Intergenic	ENSMUSG00000101610	ENSMUST00000187748	Gm7560	-	-
1_12124285_12124653	369	-	1_12124285_12124653	0	35	-7.88122	1.75007e-07	3.29918e-07	Down	Downstream (2-3kb)	ENSMUSG00000101610	ENSMUST00000187748	Gm7560	-	-
1_12432803_12433259	457	-	1_12432803_12433259	0	33	-7.79671	5.23325e-07	9.17763e-07	Down	Distal Intergenic	ENSMUSG00000098555	ENSMUST00000183490	Mir6341	microRNA 6341	Gm27262|mmu-mir-6341
1_12499018_12499313	296	1_12499018_12499313	-	28	0	8.12131	7.04361e-09	1.66011e-08	Up	Distal Intergenic	ENSMUSG00000097628	ENSMUST00000181461	Gm2383	-	-
1_12577877_12578234	358	-	1_12577877_12578234	0	29	-7.61119	2.75402e-06	4.40215e-06	Down	Distal Intergenic	ENSMUSG00000097628	ENSMUST00000181461	Gm2383	-	-
1_12579951_12580390	440	1_12579951_12580390	-	40	0	8.63433	3.33429e-12	1.75371e-11	Up	Distal Intergenic	ENSMUSG00000097628	ENSMUST00000181461	Gm2383	-	-
1_12589058_12589479	422	-	1_12589058_12589479	0	38	-7.99939	5.909e-08	1.17873e-07	Down	Distal Intergenic	ENSMUSG00000097628	ENSMUST00000181461	Gm2383	-	-
1_12590536_12590954	419	1_12590536_12590954	-	36	0	8.48273	4.79413e-11	1.90587e-10	Up	Distal Intergenic	ENSMUSG00000097628	ENSMUST00000181461	Gm2383	-	-
1_12675158_12675499	342	-	1_12675158_12675499	0	30	-7.65985	1.5797e-06	2.60196e-06	Down	Downstream (2-3kb)	ENSMUSG00000101314	ENSMUST00000186962	Gm29663	-	-
1_12691949_12692327	379	-	1_12691949_12692327	0	36	-7.9217	1.01568e-07	1.94955e-07	Down	Promoter (<=1kb)	ENSMUSG00000016918	ENSMUST00000177608	Sulf1	sulfatase 1	AI467640|AW121680|mKIAA1077
1_12716601_12717556	956	1_12716784_12717022	1_12716601_12717556	22	83	-1.34864	0.000535268	0.000748072	Down	Promoter (<=1kb)	ENSMUSG00000016918	ENSMUST00000187376	Sulf1	sulfatase 1	AI467640|AW121680|mKIAA1077
1_12720212_12721262	1051	1_12720212_12721262	-	80	0	9.63251	8.90188e-22	4.71788e-20	Up	Intron (ENSMUST00000177608/ENSMUSG00000016918, intron 1 of 21)	ENSMUSG00000016918	ENSMUST00000189541	Sulf1	sulfatase 1	AI467640|AW121680|mKIAA1077
1_12722508_12722756	249	1_12722508_12722756	-	24	0	7.89978	7.04324e-08	1.37487e-07	Up	Intron (ENSMUST00000177608/ENSMUSG00000016918, intron 1 of 21)	ENSMUSG00000016918	ENSMUST00000189541	Sulf1	sulfatase 1	AI467640|AW121680|mKIAA1077
1_12722976_12723916	941	1_12722976_12723916	-	77	0	9.57744	4.84905e-21	2.2224e-19	Up	Intron (ENSMUST00000177608/ENSMUSG00000016918, intron 1 of 21)	ENSMUSG00000016918	ENSMUST00000189541	Sulf1	sulfatase 1	AI467640|AW121680|mKIAA1077
1_12725435_12725768	334	1_12725435_12725768	-	25	0	7.95843	3.94049e-08	8.10452e-08	Up	Intron (ENSMUST00000177608/ENSMUSG00000016918, intron 1 of 21)	ENSMUSG00000016918	ENSMUST00000186405	Sulf1	sulfatase 1	AI467640|AW121680|mKIAA1077
1_12726601_12726839	239	1_12726601_12726839	-	29	0	8.17176	3.99443e-09	1.00658e-08	Up	Promoter (1-2kb)	ENSMUSG00000016918	ENSMUST00000186405	Sulf1	sulfatase 1	AI467640|AW121680|mKIAA1077
1_12727175_12727590	416	1_12727175_12727590	-	37	0	8.52215	1.63617e-11	7.0045e-11	Up	Promoter (<=1kb)	ENSMUSG00000016918	ENSMUST00000186405	Sulf1	sulfatase 1	AI467640|AW121680|mKIAA1077
1_12728138_12728621	484	1_12728138_12728621	-	42	0	8.70454	1.17118e-12	7.07889e-12	Up	Promoter (<=1kb)	ENSMUSG00000016918	ENSMUST00000186405	Sulf1	sulfatase 1	AI467640|AW121680|mKIAA1077
1_12730003_12730318	316	1_12730003_12730318	-	41	0	8.66986	1.97336e-12	1.10472e-11	Up	Intron (ENSMUST00000177608/ENSMUSG00000016918, intron 2 of 21)	ENSMUSG00000016918	ENSMUST00000186405	Sulf1	sulfatase 1	AI467640|AW121680|mKIAA1077
1_12736719_12737317	599	1_12736719_12737317	-	59	0	9.19387	5.93548e-17	1.01453e-15	Up	Intron (ENSMUST00000177608/ENSMUSG00000016918, intron 2 of 21)	ENSMUSG00000016918	ENSMUST00000186405	Sulf1	sulfatase 1	AI467640|AW121680|mKIAA1077
1_12739695_12747093	7399	1_12739695_12739976;1_12740197_12747075	1_12739731_12741178;1_12741734_12743101;1_12743703_12746043;1_12746234_12747093	953	594	1.24476	1.67881e-08	3.75591e-08	Up	Intron (ENSMUST00000177608/ENSMUSG00000016918, intron 2 of 21)	ENSMUSG00000016918	ENSMUST00000186405	Sulf1	sulfatase 1	AI467640|AW121680|mKIAA1077
1_12748041_12748442	402	1_12748051_12748390	1_12748041_12748442	50	36	1.03383	0.0074317	0.00976094	Up	Intron (ENSMUST00000177608/ENSMUSG00000016918, intron 2 of 21)	ENSMUSG00000016918	ENSMUST00000186405	Sulf1	sulfatase 1	AI467640|AW121680|mKIAA1077
1_12749057_12749307	251	1_12749057_12749307	-	33	0	8.35756	2.45934e-10	8.02848e-10	Up	Intron (ENSMUST00000177608/ENSMUSG00000016918, intron 2 of 21)	ENSMUSG00000016918	ENSMUST00000186405	Sulf1	sulfatase 1	AI467640|AW121680|mKIAA1077
1_12751228_12751803	576	1_12751228_12751803	-	53	0	9.03943	1.69034e-15	2.06502e-14	Up	Intron (ENSMUST00000177608/ENSMUSG00000016918, intron 2 of 21)	ENSMUSG00000016918	ENSMUST00000186405	Sulf1	sulfatase 1	AI467640|AW121680|mKIAA1077
1_12752158_12752505	348	1_12752158_12752505	-	35	0	8.4422	8.24314e-11	3.08621e-10	Up	Intron (ENSMUST00000177608/ENSMUSG00000016918, intron 2 of 21)	ENSMUSG00000016918	ENSMUST00000186405	Sulf1	sulfatase 1	AI467640|AW121680|mKIAA1077
1_12756912_12757152	241	1_12756912_12757152	-	26	0	8.01479	2.21221e-08	4.74092e-08	Up	Intron (ENSMUST00000177608/ENSMUSG00000016918, intron 2 of 21)	ENSMUSG00000016918	ENSMUST00000186674	Sulf1	sulfatase 1	AI467640|AW121680|mKIAA1077
1_12757508_12757985	478	1_12757508_12757985	-	53	0	9.03943	1.69034e-15	2.06502e-14	Up	Intron (ENSMUST00000177608/ENSMUSG00000016918, intron 2 of 21)	ENSMUSG00000016918	ENSMUST00000186674	Sulf1	sulfatase 1	AI467640|AW121680|mKIAA1077
1_12758474_12758848	375	1_12758474_12758848	-	40	0	8.63433	3.33429e-12	1.75371e-11	Up	Intron (ENSMUST00000177608/ENSMUSG00000016918, intron 2 of 21)	ENSMUSG00000016918	ENSMUST00000186674	Sulf1	sulfatase 1	AI467640|AW121680|mKIAA1077
1_12760164_12760413	250	1_12760164_12760413	-	30	0	8.2205	1.29729e-09	3.54454e-09	Up	Intron (ENSMUST00000177608/ENSMUSG00000016918, intron 2 of 21)	ENSMUSG00000016918	ENSMUST00000186674	Sulf1	sulfatase 1	AI467640|AW121680|mKIAA1077
1_12761057_12761298	242	1_12761057_12761298	-	28	0	8.12131	7.04361e-09	1.66011e-08	Up	Intron (ENSMUST00000177608/ENSMUSG00000016918, intron 2 of 21)	ENSMUSG00000016918	ENSMUST00000186674	Sulf1	sulfatase 1	AI467640|AW121680|mKIAA1077
1_12763769_12764520	752	-	1_12763769_12764520	0	63	-8.7265	7.2951e-13	4.64356e-12	Down	Intron (ENSMUST00000177608/ENSMUSG00000016918, intron 2 of 21)	ENSMUSG00000016918	ENSMUST00000186674	Sulf1	sulfatase 1	AI467640|AW121680|mKIAA1077
1_12780560_12780798	239	1_12780560_12780798	-	26	0	8.01479	2.21221e-08	4.74092e-08	Up	Intron (ENSMUST00000177608/ENSMUSG00000016918, intron 2 of 21)	ENSMUSG00000016918	ENSMUST00000186674	Sulf1	sulfatase 1	AI467640|AW121680|mKIAA1077
1_12790214_12790713	500	1_12790214_12790713	-	43	0	8.73841	4.15962e-13	2.73662e-12	Up	Intron (ENSMUST00000177608/ENSMUSG00000016918, intron 4 of 21)	ENSMUSG00000016918	ENSMUST00000186674	Sulf1	sulfatase 1	AI467640|AW121680|mKIAA1077
1_12796907_12797217	311	-	1_12796907_12797217	0	36	-7.9217	1.01568e-07	1.94955e-07	Down	Exon (ENSMUST00000177608/ENSMUSG00000016918, exon 5 of 22)	ENSMUSG00000016918	ENSMUST00000186674	Sulf1	sulfatase 1	AI467640|AW121680|mKIAA1077
1_12798114_12798352	239	1_12798114_12798352	-	22	0	7.7748	4.1078e-07	7.32295e-07	Up	Intron (ENSMUST00000177608/ENSMUSG00000016918, intron 5 of 21)	ENSMUSG00000016918	ENSMUST00000186674	Sulf1	sulfatase 1	AI467640|AW121680|mKIAA1077
1_12810234_12810786	553	1_12810234_12810786	-	65	0	9.33337	2.32769e-18	5.94095e-17	Up	Intron (ENSMUST00000177608/ENSMUSG00000016918, intron 7 of 21)	ENSMUSG00000016918	ENSMUST00000186674	Sulf1	sulfatase 1	AI467640|AW121680|mKIAA1077
1_12812505_12812759	255	1_12812505_12812759	-	33	0	8.35756	2.45934e-10	8.02848e-10	Up	Intron (ENSMUST00000177608/ENSMUSG00000016918, intron 7 of 21)	ENSMUSG00000016918	ENSMUST00000189447	Sulf1	sulfatase 1	AI467640|AW121680|mKIAA1077
1_12813336_12816192	2857	1_12813336_12816192	1_12813484_12815103	332	205	1.2579	2.3143e-07	4.28732e-07	Up	Intron (ENSMUST00000177608/ENSMUSG00000016918, intron 7 of 21)	ENSMUSG00000016918	ENSMUST00000189447	Sulf1	sulfatase 1	AI467640|AW121680|mKIAA1077
1_12818564_12819599	1036	1_12818564_12819599	-	72	0	9.48071	4.20784e-20	1.51936e-18	Up	Intron (ENSMUST00000177608/ENSMUSG00000016918, intron 9 of 21)	ENSMUSG00000016918	ENSMUST00000189447	Sulf1	sulfatase 1	AI467640|AW121680|mKIAA1077
1_12820203_12820877	675	1_12820203_12820877	-	46	0	8.83549	8.98453e-14	7.11197e-13	Up	Exon (ENSMUST00000177608/ENSMUSG00000016918, exon 10 of 22)	ENSMUSG00000016918	ENSMUST00000189447	Sulf1	sulfatase 1	AI467640|AW121680|mKIAA1077
1_12832016_12832425	410	1_12832016_12832425	-	53	0	9.03943	1.69034e-15	2.06502e-14	Up	Intron (ENSMUST00000177608/ENSMUSG00000016918, intron 12 of 21)	ENSMUSG00000016918	ENSMUST00000189447	Sulf1	sulfatase 1	AI467640|AW121680|mKIAA1077
1_12838100_12838653	554	-	1_12838100_12838653	0	34	-7.83958	3.02271e-07	5.50653e-07	Down	Exon (ENSMUST00000177608/ENSMUSG00000016918, exon 14 of 22)	ENSMUSG00000016918	ENSMUST00000189447	Sulf1	sulfatase 1	AI467640|AW121680|mKIAA1077
1_12844555_12844919	365	1_12844555_12844919	-	32	0	8.31331	4.26767e-10	1.30949e-09	Up	Intron (ENSMUST00000177608/ENSMUSG00000016918, intron 18 of 21)	ENSMUSG00000016918	ENSMUST00000185780	Sulf1	sulfatase 1	AI467640|AW121680|mKIAA1077
1_12857248_12857788	541	1_12857248_12857788	-	50	0	8.95553	7.35991e-15	7.54998e-14	Up	Intron (ENSMUST00000177608/ENSMUSG00000016918, intron 21 of 21)	ENSMUSG00000016918	ENSMUST00000185780	Sulf1	sulfatase 1	AI467640|AW121680|mKIAA1077
1_12877536_12878031	496	-	1_12877536_12878031	0	31	-7.70693	9.08175e-07	1.53104e-06	Down	Intron (ENSMUST00000188454/ENSMUSG00000025938, intron 2 of 9)	ENSMUSG00000025938	ENSMUST00000185780	Slco5a1	solute carrier organic anion transporter family, member 5A1	4732454B15|A630033C23Rik|AA407151
1_12886025_12886645	621	-	1_12886025_12886645	0	43	-8.17707	4.08541e-09	1.01592e-08	Down	Intron (ENSMUST00000188454/ENSMUSG00000025938, intron 4 of 9)	ENSMUSG00000025938	ENSMUST00000133201	Slco5a1	solute carrier organic anion transporter family, member 5A1	4732454B15|A630033C23Rik|AA407151
1_12971561_12971895	335	-	1_12971561_12971895	0	34	-7.83958	3.02271e-07	5.50653e-07	Down	Intron (ENSMUST00000188454/ENSMUSG00000025938, intron 8 of 9)	ENSMUSG00000025938	ENSMUST00000146763	Slco5a1	solute carrier organic anion transporter family, member 5A1	4732454B15|A630033C23Rik|AA407151
1_13074895_13075299	405	-	1_13074895_13075299	0	41	-8.1086	1.18072e-08	2.73413e-08	Down	Intron (ENSMUST00000187394/ENSMUSG00000099498, intron 2 of 3)	ENSMUSG00000099498	ENSMUST00000187394	Gm29283	-	-
1_13078682_13079240	559	-	1_13078682_13079240	0	49	-8.3649	3.00325e-10	9.67805e-10	Down	Downstream (<1kb)	ENSMUSG00000099498	ENSMUST00000187394	Gm29283	-	-
1_13084223_13084704	482	-	1_13084223_13084704	0	42	-8.14324	6.93678e-09	1.66011e-08	Down	Distal Intergenic	ENSMUSG00000099498	ENSMUST00000187394	Gm29283	-	-
1_13090835_13091142	308	1_13090835_13091142	-	40	0	8.63433	3.33429e-12	1.75371e-11	Up	Distal Intergenic	ENSMUSG00000099498	ENSMUST00000187394	Gm29283	-	-
1_13095237_13095663	427	1_13095237_13095663	-	45	0	8.80385	1.49345e-13	1.11491e-12	Up	Distal Intergenic	ENSMUSG00000099498	ENSMUST00000187394	Gm29283	-	-
1_13146680_13146954	275	1_13146680_13146954	-	35	0	8.4422	8.24314e-11	3.08621e-10	Up	Promoter (<=1kb)	ENSMUSG00000005886	ENSMUST00000185275	Ncoa2	nuclear receptor coactivator 2	D1Ertd433e|GRIP-1|Grip1|KAT13C|NCoA-2|SRC-2|TIF2|bHLHe75
1_13168255_13168493	239	1_13168255_13168493	-	18	0	7.48675	2.47519e-06	4.01712e-06	Up	Intron (ENSMUST00000081713/ENSMUSG00000005886, intron 11 of 21)	ENSMUSG00000005886	ENSMUST00000195493	Ncoa2	nuclear receptor coactivator 2	D1Ertd433e|GRIP-1|Grip1|KAT13C|NCoA-2|SRC-2|TIF2|bHLHe75
1_13187863_13188179	317	1_13187863_13188179	-	27	0	8.06903	1.24618e-08	2.79243e-08	Up	Intron (ENSMUST00000081713/ENSMUSG00000005886, intron 17 of 21)	ENSMUSG00000005886	ENSMUST00000195493	Ncoa2	nuclear receptor coactivator 2	D1Ertd433e|GRIP-1|Grip1|KAT13C|NCoA-2|SRC-2|TIF2|bHLHe75
1_13257196_13257446	251	1_13257196_13257446	-	30	0	8.2205	1.29729e-09	3.54454e-09	Up	Intron (ENSMUST00000081713/ENSMUSG00000005886, intron 20 of 21)	ENSMUSG00000005886	ENSMUST00000183805	Ncoa2	nuclear receptor coactivator 2	D1Ertd433e|GRIP-1|Grip1|KAT13C|NCoA-2|SRC-2|TIF2|bHLHe75
1_13259097_13259486	390	1_13259097_13259486	-	33	0	8.35756	2.45934e-10	8.02848e-10	Up	Intron (ENSMUST00000081713/ENSMUSG00000005886, intron 20 of 21)	ENSMUSG00000005886	ENSMUST00000183805	Ncoa2	nuclear receptor coactivator 2	D1Ertd433e|GRIP-1|Grip1|KAT13C|NCoA-2|SRC-2|TIF2|bHLHe75
1_13265863_13266129	267	1_13265863_13266129	-	28	0	8.12131	7.04361e-09	1.66011e-08	Up	Intron (ENSMUST00000081713/ENSMUSG00000005886, intron 20 of 21)	ENSMUSG00000005886	ENSMUST00000183805	Ncoa2	nuclear receptor coactivator 2	D1Ertd433e|GRIP-1|Grip1|KAT13C|NCoA-2|SRC-2|TIF2|bHLHe75
1_13272070_13272385	316	1_13272070_13272385	-	32	0	8.31331	4.26767e-10	1.30949e-09	Up	Intron (ENSMUST00000081713/ENSMUSG00000005886, intron 20 of 21)	ENSMUSG00000005886	ENSMUST00000183805	Ncoa2	nuclear receptor coactivator 2	D1Ertd433e|GRIP-1|Grip1|KAT13C|NCoA-2|SRC-2|TIF2|bHLHe75
1_13297053_13297291	239	1_13297053_13297291	-	22	0	7.7748	4.1078e-07	7.32295e-07	Up	Exon (ENSMUST00000194357/ENSMUSG00000104170, exon 1 of 1)	ENSMUSG00000104170	ENSMUST00000194357	Gm37702	-	-
1_13332448_13332817	370	-	1_13332448_13332817	0	24	-7.33971	2.47519e-06	4.01712e-06	Down	Intron (ENSMUST00000081713/ENSMUSG00000005886, intron 21 of 21)	ENSMUSG00000005886	ENSMUST00000157157	Ncoa2	nuclear receptor coactivator 2	D1Ertd433e|GRIP-1|Grip1|KAT13C|NCoA-2|SRC-2|TIF2|bHLHe75
1_13340600_13340850	251	1_13340600_13340850	-	24	0	7.89978	7.04324e-08	1.37487e-07	Up	Intron (ENSMUST00000081713/ENSMUSG00000005886, intron 21 of 21)	ENSMUSG00000005886	ENSMUST00000157157	Ncoa2	nuclear receptor coactivator 2	D1Ertd433e|GRIP-1|Grip1|KAT13C|NCoA-2|SRC-2|TIF2|bHLHe75
1_13360712_13361004	293	1_13360712_13361004	-	29	0	8.17176	3.99443e-09	1.00658e-08	Up	Intron (ENSMUST00000081713/ENSMUSG00000005886, intron 21 of 21)	ENSMUSG00000005886	ENSMUST00000195718	Ncoa2	nuclear receptor coactivator 2	D1Ertd433e|GRIP-1|Grip1|KAT13C|NCoA-2|SRC-2|TIF2|bHLHe75
1_13368567_13368908	342	1_13368567_13368908	-	25	0	7.95843	3.94049e-08	8.10452e-08	Up	Intron (ENSMUST00000081713/ENSMUSG00000005886, intron 21 of 21)	ENSMUSG00000005886	ENSMUST00000139970	Ncoa2	nuclear receptor coactivator 2	D1Ertd433e|GRIP-1|Grip1|KAT13C|NCoA-2|SRC-2|TIF2|bHLHe75
1_13373943_13375334	1392	1_13374186_13375007	1_13373943_13375334	154	492	-1.11226	5.59752e-06	8.7095e-06	Down	Promoter (<=1kb)	ENSMUSG00000005886	ENSMUST00000068304	Ncoa2	nuclear receptor coactivator 2	D1Ertd433e|GRIP-1|Grip1|KAT13C|NCoA-2|SRC-2|TIF2|bHLHe75
1_13375509_13375824	316	-	1_13375509_13375824	0	27	-7.50864	8.426e-06	1.282e-05	Down	Promoter (<=1kb)	ENSMUSG00000101476	ENSMUST00000185813	Gm29570	-	-
1_13376154_13376484	331	-	1_13376154_13376484	0	21	-7.14833	1.54285e-05	2.29874e-05	Down	Promoter (<=1kb)	ENSMUSG00000101476	ENSMUST00000185813	Gm29570	-	-
1_13383161_13383487	327	1_13383161_13383487	-	29	0	8.17176	3.99443e-09	1.00658e-08	Up	Intron (ENSMUST00000185813/ENSMUSG00000101476, intron 1 of 1)	ENSMUSG00000101476	ENSMUST00000185813	Gm29570	-	-
1_13391207_13391837	631	-	1_13391207_13391837	0	47	-8.30497	8.46962e-10	2.41856e-09	Down	Downstream (2-3kb)	ENSMUSG00000101476	ENSMUST00000185813	Gm29570	-	-
1_13443750_13444326	577	-	1_13443750_13444326	0	41	-8.1086	1.18072e-08	2.73413e-08	Down	Distal Intergenic	ENSMUSG00000101171	ENSMUST00000187246	Gm7593	-	-
1_13455267_13455806	540	1_13455267_13455806	-	45	0	8.80385	1.49345e-13	1.11491e-12	Up	Distal Intergenic	ENSMUSG00000101171	ENSMUST00000187246	Gm7593	-	-
1_13455929_13456847	919	-	1_13455929_13456847	0	80	-9.07042	9.7909e-16	1.30957e-14	Down	Distal Intergenic	ENSMUSG00000101171	ENSMUST00000187246	Gm7593	-	-
1_13463407_13463832	426	1_13463407_13463832	-	49	0	8.92644	1.20778e-14	1.17285e-13	Up	Distal Intergenic	ENSMUSG00000101171	ENSMUST00000187246	Gm7593	-	-
1_13502050_13502301	252	1_13502050_13502301	-	38	0	8.56052	9.60067e-12	4.38615e-11	Up	Distal Intergenic	ENSMUSG00000025935	ENSMUST00000185447	Tram1	translocating chain-associating membrane protein 1	1810049E02Rik|TRAMP
1_13504631_13505217	587	-	1_13504631_13505217	0	63	-8.7265	7.2951e-13	4.64356e-12	Down	Distal Intergenic	ENSMUSG00000025935	ENSMUST00000185447	Tram1	translocating chain-associating membrane protein 1	1810049E02Rik|TRAMP
1_13509388_13509970	583	1_13509388_13509970	-	81	0	9.65041	5.85329e-22	3.29219e-20	Up	Distal Intergenic	ENSMUSG00000025935	ENSMUST00000185447	Tram1	translocating chain-associating membrane protein 1	1810049E02Rik|TRAMP
1_13510265_13510865	601	1_13510265_13510865	-	61	0	9.24189	1.46208e-17	2.89511e-16	Up	Distal Intergenic	ENSMUSG00000025935	ENSMUST00000185447	Tram1	translocating chain-associating membrane protein 1	1810049E02Rik|TRAMP
1_13512141_13512405	265	1_13512141_13512405	-	23	0	7.83864	2.27396e-07	4.21299e-07	Up	Distal Intergenic	ENSMUSG00000025935	ENSMUST00000185447	Tram1	translocating chain-associating membrane protein 1	1810049E02Rik|TRAMP
1_13512851_13513161	311	-	1_13512851_13513161	0	27	-7.50864	8.426e-06	1.282e-05	Down	Distal Intergenic	ENSMUSG00000025935	ENSMUST00000185447	Tram1	translocating chain-associating membrane protein 1	1810049E02Rik|TRAMP
1_13530191_13530501	311	-	1_13530191_13530501	0	25	-7.39824	2.59951e-05	3.8153e-05	Down	Distal Intergenic	ENSMUSG00000025935	ENSMUST00000185447	Tram1	translocating chain-associating membrane protein 1	1810049E02Rik|TRAMP
1_13571532_13572033	502	-	1_13571532_13572033	0	35	-7.88122	1.75007e-07	3.29918e-07	Down	Exon (ENSMUST00000027068/ENSMUSG00000025935, exon 7 of 11)	ENSMUSG00000025935	ENSMUST00000185447	Tram1	translocating chain-associating membrane protein 1	1810049E02Rik|TRAMP
1_13577928_13578266	339	-	1_13577928_13578266	0	22	-7.21498	8.35118e-06	1.282e-05	Down	3' UTR	ENSMUSG00000025935	ENSMUST00000185447	Tram1	translocating chain-associating membrane protein 1	1810049E02Rik|TRAMP
1_13586510_13587100	591	1_13586510_13587100	-	44	0	8.7715	2.48909e-13	1.74548e-12	Up	Intron (ENSMUST00000027068/ENSMUSG00000025935, intron 10 of 10)	ENSMUSG00000025935	ENSMUST00000188377	Tram1	translocating chain-associating membrane protein 1	1810049E02Rik|TRAMP
1_13588864_13589270	407	-	1_13588864_13589270	0	28	-7.56082	4.812e-06	7.49864e-06	Down	Intron (ENSMUST00000027068/ENSMUSG00000025935, intron 10 of 10)	ENSMUSG00000025935	ENSMUST00000188377	Tram1	translocating chain-associating membrane protein 1	1810049E02Rik|TRAMP
1_13589550_13590121	572	-	1_13589550_13590121	0	103	-9.4344	3.71413e-18	8.74993e-17	Down	Promoter (<=1kb)	ENSMUSG00000025935	ENSMUST00000027068	Tram1	translocating chain-associating membrane protein 1	1810049E02Rik|TRAMP
1_13600336_13600768	433	-	1_13600336_13600768	0	36	-7.9217	1.01568e-07	1.94955e-07	Down	Distal Intergenic	ENSMUSG00000025935	ENSMUST00000027068	Tram1	translocating chain-associating membrane protein 1	1810049E02Rik|TRAMP
1_13603630_13603960	331	1_13603630_13603960	-	25	0	7.95843	3.94049e-08	8.10452e-08	Up	Distal Intergenic	ENSMUSG00000025935	ENSMUST00000027068	Tram1	translocating chain-associating membrane protein 1	1810049E02Rik|TRAMP
1_13606574_13607051	478	1_13606574_13607051	-	52	0	9.012	2.75344e-15	3.17747e-14	Up	Distal Intergenic	ENSMUSG00000025935	ENSMUST00000027068	Tram1	translocating chain-associating membrane protein 1	1810049E02Rik|TRAMP
1_13634857_13635251	395	-	1_13634857_13635251	0	34	-7.83958	3.02271e-07	5.50653e-07	Down	Intron (ENSMUST00000027071/ENSMUSG00000025937, intron 3 of 6)	ENSMUSG00000025937	ENSMUST00000156222	Lactb2	lactamase, beta 2	Cgi-83|E430032H21Rik
1_13635760_13636553	794	1_13635760_13636553	-	85	0	9.71987	1.11358e-22	7.13776e-21	Up	Intron (ENSMUST00000027071/ENSMUSG00000025937, intron 3 of 6)	ENSMUSG00000025937	ENSMUST00000156222	Lactb2	lactamase, beta 2	Cgi-83|E430032H21Rik
1_13659724_13661357	1634	-	1_13659724_13661357	0	231	-10.5985	6.75589e-33	3.06609e-30	Down	Promoter (<=1kb)	ENSMUSG00000025937	ENSMUST00000027071	Lactb2	lactamase, beta 2	Cgi-83|E430032H21Rik
1_13940741_13941663	923	1_13940948_13941663	1_13940741_13941289	65	45	1.09094	0.00227599	0.00308629	Up	Distal Intergenic	ENSMUSG00000089358	ENSMUST00000158733	Gm25491	-	-
1_13999103_13999341	239	1_13999103_13999341	-	33	0	8.35756	2.45934e-10	8.02848e-10	Up	Distal Intergenic	ENSMUSG00000089358	ENSMUST00000158733	Gm25491	-	-
1_14183254_14183672	419	1_14183254_14183672	-	39	0	8.59789	5.64977e-12	2.78967e-11	Up	Exon (ENSMUST00000027066/ENSMUSG00000025932, exon 15 of 18)	ENSMUSG00000025932	ENSMUST00000179783	Eya1	EYA transcriptional coactivator and phosphatase 1	bor
1_14184045_14184658	614	-	1_14184045_14184658	0	49	-8.3649	3.00325e-10	9.67805e-10	Down	Exon (ENSMUST00000027066/ENSMUSG00000025932, exon 13 of 18)	ENSMUSG00000025932	ENSMUST00000179783	Eya1	EYA transcriptional coactivator and phosphatase 1	bor
1_14184764_14185415	652	1_14184764_14185251	1_14184964_14185415	61	43	1.06482	0.00263222	0.00355829	Up	Intron (ENSMUST00000027066/ENSMUSG00000025932, intron 6 of 17)	ENSMUSG00000025932	ENSMUST00000179783	Eya1	EYA transcriptional coactivator and phosphatase 1	bor
1_14185640_14187087	1448	1_14185640_14186927	1_14186613_14187087	149	52	2.07853	8.58892e-12	4.14024e-11	Up	Intron (ENSMUST00000027066/ENSMUSG00000025932, intron 6 of 17)	ENSMUSG00000025932	ENSMUST00000179783	Eya1	EYA transcriptional coactivator and phosphatase 1	bor
1_14188651_14188903	253	1_14188651_14188903	-	30	0	8.2205	1.29729e-09	3.54454e-09	Up	Intron (ENSMUST00000027066/ENSMUSG00000025932, intron 6 of 17)	ENSMUSG00000025932	ENSMUST00000179783	Eya1	EYA transcriptional coactivator and phosphatase 1	bor
1_14192548_14192803	256	1_14192548_14192803	-	25	0	7.95843	3.94049e-08	8.10452e-08	Up	Intron (ENSMUST00000027066/ENSMUSG00000025932, intron 6 of 17)	ENSMUSG00000025932	ENSMUST00000179783	Eya1	EYA transcriptional coactivator and phosphatase 1	bor
1_14199205_14199673	469	-	1_14199205_14199673	0	31	-7.70693	9.08175e-07	1.53104e-06	Down	Intron (ENSMUST00000027066/ENSMUSG00000025932, intron 6 of 17)	ENSMUSG00000025932	ENSMUST00000179783	Eya1	EYA transcriptional coactivator and phosphatase 1	bor
1_14207566_14208323	758	1_14207566_14208323	1_14207594_14208173	87	51	1.33093	4.02514e-05	5.85976e-05	Up	3' UTR	ENSMUSG00000025932	ENSMUST00000189526	Eya1	EYA transcriptional coactivator and phosphatase 1	bor
1_14209658_14210399	742	1_14209658_14210399	-	74	0	9.52018	1.76288e-20	6.96056e-19	Up	Intron (ENSMUST00000027066/ENSMUSG00000025932, intron 7 of 17)	ENSMUSG00000025932	ENSMUST00000189526	Eya1	EYA transcriptional coactivator and phosphatase 1	bor
1_14210988_14211288	301	1_14210988_14211288	-	30	0	8.2205	1.29729e-09	3.54454e-09	Up	Intron (ENSMUST00000027066/ENSMUSG00000025932, intron 7 of 17)	ENSMUSG00000025932	ENSMUST00000189526	Eya1	EYA transcriptional coactivator and phosphatase 1	bor
1_14223023_14223291	269	1_14223023_14223291	-	36	0	8.48273	4.79413e-11	1.90587e-10	Up	Intron (ENSMUST00000027066/ENSMUSG00000025932, intron 7 of 17)	ENSMUSG00000025932	ENSMUST00000189526	Eya1	EYA transcriptional coactivator and phosphatase 1	bor
1_14231054_14231539	486	1_14231054_14231539	-	36	0	8.48273	4.79413e-11	1.90587e-10	Up	Promoter (<=1kb)	ENSMUSG00000025932	ENSMUST00000189526	Eya1	EYA transcriptional coactivator and phosphatase 1	bor
1_14265323_14265658	336	1_14265323_14265658	-	38	0	8.56052	9.60067e-12	4.38615e-11	Up	Intron (ENSMUST00000027066/ENSMUSG00000025932, intron 11 of 17)	ENSMUSG00000025932	ENSMUST00000193605	Eya1	EYA transcriptional coactivator and phosphatase 1	bor
1_14287935_14288357	423	1_14287935_14288357	-	39	0	8.59789	5.64977e-12	2.78967e-11	Up	Intron (ENSMUST00000027066/ENSMUSG00000025932, intron 15 of 17)	ENSMUSG00000025932	ENSMUST00000190337	Eya1	EYA transcriptional coactivator and phosphatase 1	bor
1_14297698_14297945	248	1_14297698_14297945	-	19	0	7.56433	1.3552e-06	2.2703e-06	Up	Intron (ENSMUST00000027066/ENSMUSG00000025932, intron 15 of 17)	ENSMUSG00000025932	ENSMUST00000190337	Eya1	EYA transcriptional coactivator and phosphatase 1	bor
1_14298388_14299247	860	1_14298745_14299247	1_14298388_14298745	60	22	2.0031	8.26652e-07	1.43733e-06	Up	Intron (ENSMUST00000027066/ENSMUSG00000025932, intron 15 of 17)	ENSMUSG00000025932	ENSMUST00000190337	Eya1	EYA transcriptional coactivator and phosphatase 1	bor
1_14303054_14303480	427	1_14303054_14303480	-	48	0	8.89676	3.27725e-14	2.96107e-13	Up	Exon (ENSMUST00000185329/ENSMUSG00000025932, exon 2 of 2)	ENSMUSG00000025932	ENSMUST00000190337	Eya1	EYA transcriptional coactivator and phosphatase 1	bor
1_14306357_14306602	246	1_14306357_14306602	-	42	0	8.70454	1.17118e-12	7.07889e-12	Up	Promoter (1-2kb)	ENSMUSG00000025932	ENSMUST00000185453	Eya1	EYA transcriptional coactivator and phosphatase 1	bor
1_14307099_14307806	708	1_14307123_14307806	1_14307099_14307590	82	45	1.42566	3.46671e-05	5.05818e-05	Up	Intron (ENSMUST00000027066/ENSMUSG00000025932, intron 17 of 17)	ENSMUSG00000025932	ENSMUST00000187790	Eya1	EYA transcriptional coactivator and phosphatase 1	bor
1_14312033_14312814	782	1_14312208_14312814	1_14312033_14312343	59	30	1.53402	4.94198e-05	7.17769e-05	Up	Distal Intergenic	ENSMUSG00000025932	ENSMUST00000168081	Eya1	EYA transcriptional coactivator and phosphatase 1	bor
1_14649947_14650257	311	-	1_14649947_14650257	0	24	-7.33971	2.47519e-06	4.01712e-06	Down	Distal Intergenic	ENSMUSG00000054493	ENSMUST00000187401	Gm9947	-	-
1_15130064_15131455	1392	-	1_15130064_15131455	0	107	-9.48928	7.18586e-19	2.01653e-17	Down	Distal Intergenic	ENSMUSG00000088159	ENSMUST00000157534	Gm26345	-	-
1_15131739_15132925	1187	1_15132687_15132925	1_15131739_15132812	28	115	-1.47186	4.3055e-05	6.26376e-05	Down	Distal Intergenic	ENSMUSG00000088159	ENSMUST00000157534	Gm26345	-	-
1_15749833_15750071	239	1_15749833_15750071	-	23	0	7.83864	2.27396e-07	4.21299e-07	Up	Distal Intergenic	ENSMUSG00000077377	ENSMUST00000104189	Gm25168	-	-
1_15803099_15803792	694	1_15803099_15803792	-	62	0	9.26531	9.20566e-18	1.93493e-16	Up	Promoter (1-2kb)	ENSMUSG00000025925	ENSMUST00000188371	Terf1	telomeric repeat binding factor 1	Pin2|Trbf1|Trf1
1_15823239_15823493	255	1_15823239_15823493	-	33	0	8.35756	2.45934e-10	8.02848e-10	Up	Intron (ENSMUST00000188371/ENSMUSG00000025925, intron 6 of 9)	ENSMUSG00000025925	ENSMUST00000188684	Terf1	telomeric repeat binding factor 1	Pin2|Trbf1|Trf1
1_15833200_15833628	429	1_15833200_15833628	-	31	0	8.26765	7.42892e-10	2.14936e-09	Up	Exon (ENSMUST00000188371/ENSMUSG00000025925, exon 8 of 10)	ENSMUSG00000025925	ENSMUST00000194867	Terf1	telomeric repeat binding factor 1	Pin2|Trbf1|Trf1
1_15834795_15835479	685	1_15834795_15835479	-	77	0	9.57744	4.84905e-21	2.2224e-19	Up	Intron (ENSMUST00000188371/ENSMUSG00000025925, intron 8 of 9)	ENSMUSG00000025925	ENSMUST00000194867	Terf1	telomeric repeat binding factor 1	Pin2|Trbf1|Trf1
1_15837392_15838047	656	1_15837392_15837782	1_15837635_15838047	49	28	1.36562	0.000730758	0.0010156	Up	Intron (ENSMUST00000188371/ENSMUSG00000025925, intron 8 of 9)	ENSMUSG00000025925	ENSMUST00000194867	Terf1	telomeric repeat binding factor 1	Pin2|Trbf1|Trf1
1_15838468_15839185	718	1_15838468_15839185	-	85	0	9.71987	1.11358e-22	7.13776e-21	Up	Intron (ENSMUST00000188371/ENSMUSG00000025925, intron 9 of 9)	ENSMUSG00000025925	ENSMUST00000194867	Terf1	telomeric repeat binding factor 1	Pin2|Trbf1|Trf1
1_15840237_15840548	312	-	1_15840237_15840548	0	29	-7.61119	2.75402e-06	4.40215e-06	Down	Intron (ENSMUST00000188371/ENSMUSG00000025925, intron 9 of 9)	ENSMUSG00000025925	ENSMUST00000194867	Terf1	telomeric repeat binding factor 1	Pin2|Trbf1|Trf1
1_15841545_15842140	596	1_15841545_15842140	-	69	0	9.4194	2.45415e-19	7.6179e-18	Up	Intron (ENSMUST00000188371/ENSMUSG00000025925, intron 9 of 9)	ENSMUSG00000025925	ENSMUST00000194867	Terf1	telomeric repeat binding factor 1	Pin2|Trbf1|Trf1
1_15846812_15847065	254	1_15846812_15847065	-	38	0	8.56052	9.60067e-12	4.38615e-11	Up	Downstream (2-3kb)	ENSMUSG00000104379	ENSMUST00000194867	Gm37509	-	-
1_15853547_15854403	857	1_15853547_15854403	-	89	0	9.78613	1.45412e-23	1.12577e-21	Up	Promoter (<=1kb)	ENSMUSG00000104379	ENSMUST00000194867	Gm37509	-	-
1_15858033_15858343	311	-	1_15858033_15858343	0	21	-7.14833	1.54285e-05	2.29874e-05	Down	Intron (ENSMUST00000040695/ENSMUSG00000032719, intron 1 of 4)	ENSMUSG00000032719	ENSMUST00000194867	Sbspon	somatomedin B and thrombospondin, type 1 domain containing	Gm106|Rpesp
1_15858659_15859131	473	1_15858659_15859131	-	46	0	8.83549	8.98453e-14	7.11197e-13	Up	Exon (ENSMUST00000040695/ENSMUSG00000032719, exon 4 of 5)	ENSMUSG00000032719	ENSMUST00000194867	Sbspon	somatomedin B and thrombospondin, type 1 domain containing	Gm106|Rpesp
1_15860800_15861980	1181	1_15860800_15861771	1_15861510_15861980	104	33	2.2139	1.10675e-10	4.08993e-10	Up	Intron (ENSMUST00000040695/ENSMUSG00000032719, intron 3 of 4)	ENSMUSG00000032719	ENSMUST00000194867	Sbspon	somatomedin B and thrombospondin, type 1 domain containing	Gm106|Rpesp
1_15870736_15872051	1316	1_15870736_15871906	1_15871158_15872051	115	60	1.49924	1.4312e-06	2.3958e-06	Up	Intron (ENSMUST00000040695/ENSMUSG00000032719, intron 3 of 4)	ENSMUSG00000032719	ENSMUST00000158318	Sbspon	somatomedin B and thrombospondin, type 1 domain containing	Gm106|Rpesp
1_15873458_15874093	636	1_15873458_15873911	1_15873682_15874093	61	36	1.32019	0.000333099	0.000469348	Up	Intron (ENSMUST00000040695/ENSMUSG00000032719, intron 3 of 4)	ENSMUSG00000032719	ENSMUST00000158318	Sbspon	somatomedin B and thrombospondin, type 1 domain containing	Gm106|Rpesp
1_15877219_15878965	1747	1_15877219_15878654	1_15877683_15878061;1_15878602_15878965	111	50	1.71053	6.97737e-08	1.37487e-07	Up	Promoter (<=1kb)	ENSMUSG00000088943	ENSMUST00000158318	Gm23259	-	-
1_15881703_15882094	392	1_15881703_15882094	-	34	0	8.4005	1.42164e-10	4.99774e-10	Up	Intron (ENSMUST00000040695/ENSMUSG00000032719, intron 3 of 4)	ENSMUSG00000032719	ENSMUST00000158318	Sbspon	somatomedin B and thrombospondin, type 1 domain containing	Gm106|Rpesp
1_15887967_15888305	339	1_15887967_15888305	-	30	0	8.2205	1.29729e-09	3.54454e-09	Up	Intron (ENSMUST00000040695/ENSMUSG00000032719, intron 4 of 4)	ENSMUSG00000032719	ENSMUST00000040695	Sbspon	somatomedin B and thrombospondin, type 1 domain containing	Gm106|Rpesp
1_15888478_15889465	988	1_15888478_15889465	-	89	0	9.78613	1.45412e-23	1.12577e-21	Up	Intron (ENSMUST00000040695/ENSMUSG00000032719, intron 4 of 4)	ENSMUSG00000032719	ENSMUST00000040695	Sbspon	somatomedin B and thrombospondin, type 1 domain containing	Gm106|Rpesp
1_15891364_15892048	685	1_15891364_15892048	-	56	0	9.11872	2.45896e-16	3.62401e-15	Up	Intron (ENSMUST00000040695/ENSMUSG00000032719, intron 4 of 4)	ENSMUSG00000032719	ENSMUST00000040695	Sbspon	somatomedin B and thrombospondin, type 1 domain containing	Gm106|Rpesp
1_15895042_15895927	886	1_15895042_15895927	-	76	0	9.55861	7.44212e-21	3.1957e-19	Up	Distal Intergenic	ENSMUSG00000032719	ENSMUST00000040695	Sbspon	somatomedin B and thrombospondin, type 1 domain containing	Gm106|Rpesp
1_15899053_15899359	307	1_15899053_15899359	-	39	0	8.59789	5.64977e-12	2.78967e-11	Up	Distal Intergenic	ENSMUSG00000032719	ENSMUST00000040695	Sbspon	somatomedin B and thrombospondin, type 1 domain containing	Gm106|Rpesp
1_15901810_15902120	311	-	1_15901810_15902120	0	22	-7.21498	8.35118e-06	1.282e-05	Down	Distal Intergenic	ENSMUSG00000032719	ENSMUST00000040695	Sbspon	somatomedin B and thrombospondin, type 1 domain containing	Gm106|Rpesp
1_15960677_15960966	290	1_15960677_15960966	-	27	0	8.06903	1.24618e-08	2.79243e-08	Up	Distal Intergenic	ENSMUSG00000032719	ENSMUST00000040695	Sbspon	somatomedin B and thrombospondin, type 1 domain containing	Gm106|Rpesp
1_15994991_15995320	330	1_15994991_15995320	-	37	0	8.52215	1.63617e-11	7.0045e-11	Up	Distal Intergenic	ENSMUSG00000100652	ENSMUST00000185778	Gm7634	-	-
1_15996541_15997009	469	1_15996541_15997009	-	39	0	8.59789	5.64977e-12	2.78967e-11	Up	Distal Intergenic	ENSMUSG00000100652	ENSMUST00000185778	Gm7634	-	-
1_16001750_16001988	239	1_16001750_16001988	-	30	0	8.2205	1.29729e-09	3.54454e-09	Up	Distal Intergenic	ENSMUSG00000100652	ENSMUST00000185778	Gm7634	-	-
1_16019595_16020008	414	1_16019595_16020008	-	49	0	8.92644	1.20778e-14	1.17285e-13	Up	Distal Intergenic	ENSMUSG00000100652	ENSMUST00000185778	Gm7634	-	-
1_16020939_16021534	596	1_16020939_16021534	1_16021126_16021498	90	35	1.92101	3.7582e-08	7.9183e-08	Up	Distal Intergenic	ENSMUSG00000100652	ENSMUST00000185778	Gm7634	-	-
1_16102464_16106759	4296	1_16102464_16102791;1_16103229_16105058;1_16105931_16106278	1_16102551_16106759	496	1734	-1.24257	1.4296e-08	3.20136e-08	Down	Promoter (<=1kb)	ENSMUSG00000025921	ENSMUST00000027053	Rdh10	retinol dehydrogenase 10 (all-trans)	3110069K09Rik|4921506A21Rik|AI875664|AW549993|D1Ertd762e|m366Asp
1_16109972_16110229	258	1_16109972_16110229	-	37	0	8.52215	1.63617e-11	7.0045e-11	Up	Intron (ENSMUST00000027053/ENSMUSG00000025921, intron 2 of 5)	ENSMUSG00000025921	ENSMUST00000027053	Rdh10	retinol dehydrogenase 10 (all-trans)	3110069K09Rik|4921506A21Rik|AI875664|AW549993|D1Ertd762e|m366Asp
1_16111947_16112277	331	1_16111947_16112277	-	39	0	8.59789	5.64977e-12	2.78967e-11	Up	Intron (ENSMUST00000027053/ENSMUSG00000025921, intron 2 of 5)	ENSMUSG00000025921	ENSMUST00000027053	Rdh10	retinol dehydrogenase 10 (all-trans)	3110069K09Rik|4921506A21Rik|AI875664|AW549993|D1Ertd762e|m366Asp
1_16114512_16115281	770	1_16114537_16115215	1_16114512_16115281	84	58	1.09532	0.000696347	0.000968648	Up	Intron (ENSMUST00000027053/ENSMUSG00000025921, intron 2 of 5)	ENSMUSG00000025921	ENSMUST00000027053	Rdh10	retinol dehydrogenase 10 (all-trans)	3110069K09Rik|4921506A21Rik|AI875664|AW549993|D1Ertd762e|m366Asp
1_16119674_16120194	521	1_16119674_16120194	-	58	0	9.16925	9.51107e-17	1.54796e-15	Up	Intron (ENSMUST00000027053/ENSMUSG00000025921, intron 2 of 5)	ENSMUSG00000025921	ENSMUST00000152626	Rdh10	retinol dehydrogenase 10 (all-trans)	3110069K09Rik|4921506A21Rik|AI875664|AW549993|D1Ertd762e|m366Asp
1_16120558_16121178	621	1_16120558_16121073	1_16120658_16121178	61	38	1.2425	0.000762355	0.00105851	Up	Intron (ENSMUST00000027053/ENSMUSG00000025921, intron 2 of 5)	ENSMUSG00000025921	ENSMUST00000152626	Rdh10	retinol dehydrogenase 10 (all-trans)	3110069K09Rik|4921506A21Rik|AI875664|AW549993|D1Ertd762e|m366Asp
1_16124490_16124728	239	1_16124490_16124728	-	27	0	8.06903	1.24618e-08	2.79243e-08	Up	Intron (ENSMUST00000027053/ENSMUSG00000025921, intron 2 of 5)	ENSMUSG00000025921	ENSMUST00000152626	Rdh10	retinol dehydrogenase 10 (all-trans)	3110069K09Rik|4921506A21Rik|AI875664|AW549993|D1Ertd762e|m366Asp
1_16128062_16128739	678	-	1_16128062_16128739	0	59	-8.63209	5.22709e-12	2.71383e-11	Down	Promoter (1-2kb)	ENSMUSG00000025921	ENSMUST00000152626	Rdh10	retinol dehydrogenase 10 (all-trans)	3110069K09Rik|4921506A21Rik|AI875664|AW549993|D1Ertd762e|m366Asp
1_16129035_16130030	996	-	1_16129035_16130030	0	137	-9.84541	4.34893e-23	3.13632e-21	Down	Promoter (<=1kb)	ENSMUSG00000025921	ENSMUST00000152626	Rdh10	retinol dehydrogenase 10 (all-trans)	3110069K09Rik|4921506A21Rik|AI875664|AW549993|D1Ertd762e|m366Asp
1_16130219_16131425	1207	-	1_16130219_16131425	0	200	-10.3907	6.93037e-31	2.08885e-28	Down	Promoter (<=1kb)	ENSMUSG00000025921	ENSMUST00000152626	Rdh10	retinol dehydrogenase 10 (all-trans)	3110069K09Rik|4921506A21Rik|AI875664|AW549993|D1Ertd762e|m366Asp
1_16131804_16132293	490	-	1_16131804_16132293	0	38	-7.99939	5.909e-08	1.17873e-07	Down	3' UTR	ENSMUSG00000025921	ENSMUST00000152626	Rdh10	retinol dehydrogenase 10 (all-trans)	3110069K09Rik|4921506A21Rik|AI875664|AW549993|D1Ertd762e|m366Asp
1_16151246_16151484	239	1_16151246_16151484	-	29	0	8.17176	3.99443e-09	1.00658e-08	Up	Distal Intergenic	ENSMUSG00000025921	ENSMUST00000152626	Rdh10	retinol dehydrogenase 10 (all-trans)	3110069K09Rik|4921506A21Rik|AI875664|AW549993|D1Ertd762e|m366Asp
1_16153049_16153307	259	1_16153049_16153307	-	28	0	8.12131	7.04361e-09	1.66011e-08	Up	Distal Intergenic	ENSMUSG00000025921	ENSMUST00000152626	Rdh10	retinol dehydrogenase 10 (all-trans)	3110069K09Rik|4921506A21Rik|AI875664|AW549993|D1Ertd762e|m366Asp
1_16159443_16159893	451	1_16159443_16159893	-	44	0	8.7715	2.48909e-13	1.74548e-12	Up	Distal Intergenic	ENSMUSG00000025921	ENSMUST00000152626	Rdh10	retinol dehydrogenase 10 (all-trans)	3110069K09Rik|4921506A21Rik|AI875664|AW549993|D1Ertd762e|m366Asp
1_16178887_16179295	409	-	1_16178887_16179295	0	64	-8.74917	4.48437e-13	2.89102e-12	Down	Distal Intergenic	ENSMUSG00000104165	ENSMUST00000192560	Gm38249	-	-
1_16179910_16180401	492	1_16179910_16180401	-	62	0	9.26531	9.20566e-18	1.93493e-16	Up	Distal Intergenic	ENSMUSG00000104165	ENSMUST00000192560	Gm38249	-	-
1_16181060_16181377	318	1_16181060_16181377	-	38	0	8.56052	9.60067e-12	4.38615e-11	Up	Distal Intergenic	ENSMUSG00000104165	ENSMUST00000192560	Gm38249	-	-
1_16182473_16182711	239	1_16182473_16182711	-	37	0	8.52215	1.63617e-11	7.0045e-11	Up	Distal Intergenic	ENSMUSG00000104165	ENSMUST00000192560	Gm38249	-	-
1_16189466_16189706	241	1_16189466_16189706	-	36	0	8.48273	4.79413e-11	1.90587e-10	Up	Distal Intergenic	ENSMUSG00000104165	ENSMUST00000192560	Gm38249	-	-
1_16201983_16202249	267	1_16201983_16202249	-	26	0	8.01479	2.21221e-08	4.74092e-08	Up	Distal Intergenic	ENSMUSG00000104165	ENSMUST00000192560	Gm38249	-	-
1_16228832_16229235	404	-	1_16228832_16229235	0	47	-8.30497	8.46962e-10	2.41856e-09	Down	Promoter (<=1kb)	ENSMUSG00000100868	ENSMUST00000186343	Gm28095	-	-
1_16229322_16229577	256	1_16229322_16229577	-	31	0	8.26765	7.42892e-10	2.14936e-09	Up	3' UTR	ENSMUSG00000100868	ENSMUST00000186343	Gm28095	-	-
1_16291111_16291349	239	1_16291111_16291349	-	29	0	8.17176	3.99443e-09	1.00658e-08	Up	Intron (ENSMUST00000162751/ENSMUSG00000025920, intron 2 of 13)	ENSMUSG00000025920	ENSMUST00000159190	Stau2	staufen double-stranded RNA binding protein 2	-
1_16298018_16298480	463	-	1_16298018_16298480	0	33	-7.79671	5.23325e-07	9.17763e-07	Down	Intron (ENSMUST00000162751/ENSMUSG00000025920, intron 2 of 13)	ENSMUSG00000025920	ENSMUST00000159190	Stau2	staufen double-stranded RNA binding protein 2	-
1_16299865_16300194	330	-	1_16299865_16300194	0	26	-7.4545	1.47851e-05	2.21227e-05	Down	Intron (ENSMUST00000162751/ENSMUSG00000025920, intron 2 of 13)	ENSMUSG00000025920	ENSMUST00000159190	Stau2	staufen double-stranded RNA binding protein 2	-
1_16618891_16619366	476	-	1_16618891_16619366	0	137	-9.84541	4.34893e-23	3.13632e-21	Down	Promoter (<=1kb)	ENSMUSG00000025939	ENSMUST00000182554	Ube2w	ubiquitin-conjugating enzyme E2W (putative)	6130401J04Rik
1_16650775_16651290	516	-	1_16650775_16651290	0	35	-7.88122	1.75007e-07	3.29918e-07	Down	Intron (ENSMUST00000188641/ENSMUSG00000079658, intron 3 of 3)	ENSMUSG00000079658	ENSMUST00000185393	Eloc	elongin C	2610043E24Rik|2610301I15Rik|AA407206|AI987979|AW049146|Tceb1
1_16657651_16658686	1036	1_16657732_16658163	1_16657651_16658686	33	136	-1.47729	1.16605e-05	1.76756e-05	Down	Promoter (<=1kb)	ENSMUSG00000097744	ENSMUST00000181371	D030040B21Rik	RIKEN cDNA D030040B21 gene	D030040B21
1_16665141_16666103	963	1_16665280_16665651	1_16665141_16666103	82	274	-1.17654	1.49799e-05	2.24082e-05	Down	Promoter (<=1kb)	ENSMUSG00000025940	ENSMUST00000177501	Tmem70	transmembrane protein 70	1110020A09Rik|2210416J16Rik
1_16666355_16666810	456	-	1_16666355_16666810	0	39	-8.03672	3.4461e-08	7.26383e-08	Down	Intron (ENSMUST00000177501/ENSMUSG00000025940, intron 1 of 2)	ENSMUSG00000025940	ENSMUST00000176451	Tmem70	transmembrane protein 70	1110020A09Rik|2210416J16Rik
1_16749480_16749878	399	1_16749480_16749878	-	41	0	8.66986	1.97336e-12	1.10472e-11	Up	Distal Intergenic	ENSMUSG00000100093	ENSMUST00000185649	Gm29649	-	-
1_16785524_16786174	651	1_16785524_16786174	-	46	0	8.83549	8.98453e-14	7.11197e-13	Up	Distal Intergenic	ENSMUSG00000091020	ENSMUST00000071842	Gm5828	-	-
1_16797178_16797520	343	1_16797178_16797520	-	41	0	8.66986	1.97336e-12	1.10472e-11	Up	Distal Intergenic	ENSMUSG00000091020	ENSMUST00000071842	Gm5828	-	-
1_16798124_16798457	334	-	1_16798124_16798457	0	34	-7.83958	3.02271e-07	5.50653e-07	Down	Distal Intergenic	ENSMUSG00000091020	ENSMUST00000071842	Gm5828	-	-
1_16799834_16800106	273	1_16799834_16800106	-	34	0	8.4005	1.42164e-10	4.99774e-10	Up	Distal Intergenic	ENSMUSG00000091020	ENSMUST00000071842	Gm5828	-	-
1_16810505_16810836	332	1_16810505_16810836	-	49	0	8.92644	1.20778e-14	1.17285e-13	Up	Distal Intergenic	ENSMUSG00000091020	ENSMUST00000071842	Gm5828	-	-
1_16810857_16811169	313	-	1_16810857_16811169	0	34	-7.83958	3.02271e-07	5.50653e-07	Down	Distal Intergenic	ENSMUSG00000091020	ENSMUST00000071842	Gm5828	-	-
1_16815977_16816333	357	1_16815977_16816333	-	37	0	8.52215	1.63617e-11	7.0045e-11	Up	Distal Intergenic	ENSMUSG00000091020	ENSMUST00000071842	Gm5828	-	-
1_16840877_16841211	335	1_16840877_16841211	-	43	0	8.73841	4.15962e-13	2.73662e-12	Up	Distal Intergenic	ENSMUSG00000101640	ENSMUST00000186604	Gm28376	-	-
1_16842120_16842576	457	-	1_16842120_16842576	0	33	-7.79671	5.23325e-07	9.17763e-07	Down	Distal Intergenic	ENSMUSG00000101640	ENSMUST00000186604	Gm28376	-	-
1_16852372_16852610	239	1_16852372_16852610	-	38	0	8.56052	9.60067e-12	4.38615e-11	Up	Distal Intergenic	ENSMUSG00000101640	ENSMUST00000186604	Gm28376	-	-
1_16863205_16863443	239	1_16863205_16863443	-	32	0	8.31331	4.26767e-10	1.30949e-09	Up	Distal Intergenic	ENSMUSG00000101640	ENSMUST00000186604	Gm28376	-	-
1_16866485_16867081	597	1_16866485_16867081	-	46	0	8.83549	8.98453e-14	7.11197e-13	Up	Distal Intergenic	ENSMUSG00000101640	ENSMUST00000186604	Gm28376	-	-
1_16870279_16870571	293	1_16870279_16870571	-	30	0	8.2205	1.29729e-09	3.54454e-09	Up	Distal Intergenic	ENSMUSG00000101640	ENSMUST00000186604	Gm28376	-	-
1_16902819_16903413	595	1_16902819_16903413	-	42	0	8.70454	1.17118e-12	7.07889e-12	Up	Intron (ENSMUST00000186604/ENSMUSG00000101640, intron 1 of 2)	ENSMUSG00000101640	ENSMUST00000186604	Gm28376	-	-
1_16927702_16928155	454	-	1_16927702_16928155	0	42	-8.14324	6.93678e-09	1.66011e-08	Down	Intron (ENSMUST00000186604/ENSMUSG00000101640, intron 1 of 2)	ENSMUSG00000101640	ENSMUST00000194790	Gm28376	-	-
1_16928188_16928466	279	1_16928188_16928466	-	32	0	8.31331	4.26767e-10	1.30949e-09	Up	Intron (ENSMUST00000186604/ENSMUSG00000101640, intron 1 of 2)	ENSMUSG00000101640	ENSMUST00000194790	Gm28376	-	-
1_16929662_16931063	1402	1_16929662_16931063	1_16929813_16930665	137	65	1.63638	3.76518e-08	7.93279e-08	Up	Promoter (<=1kb)	ENSMUSG00000104133	ENSMUST00000194790	4921511E07Rik	-	-
1_16932177_16933928	1752	1_16932177_16933850	1_16932783_16933418;1_16933618_16933928	159	87	1.43134	3.46994e-07	6.31558e-07	Up	Intron (ENSMUST00000186604/ENSMUSG00000101640, intron 1 of 2)	ENSMUSG00000101640	ENSMUST00000194790	Gm28376	-	-
1_16941176_16941580	405	-	1_16941176_16941580	0	50	-8.39396	1.79489e-10	6.15694e-10	Down	Intron (ENSMUST00000186604/ENSMUSG00000101640, intron 1 of 2)	ENSMUSG00000101640	ENSMUST00000194790	Gm28376	-	-
1_16942874_16945517	2644	1_16942874_16945497	1_16942889_16944628;1_16944784_16945517	285	206	1.03074	2.4427e-05	3.62061e-05	Up	Intron (ENSMUST00000186604/ENSMUSG00000101640, intron 1 of 2)	ENSMUSG00000101640	ENSMUST00000194790	Gm28376	-	-
1_16946156_16946485	330	1_16946156_16946485	-	35	0	8.4422	8.24314e-11	3.08621e-10	Up	Intron (ENSMUST00000186604/ENSMUSG00000101640, intron 1 of 2)	ENSMUSG00000101640	ENSMUST00000194790	Gm28376	-	-
1_16954699_16955204	506	1_16954699_16955204	-	43	0	8.73841	4.15962e-13	2.73662e-12	Up	Intron (ENSMUST00000186604/ENSMUSG00000101640, intron 1 of 2)	ENSMUSG00000101640	ENSMUST00000194790	Gm28376	-	-
1_16957870_16958224	355	-	1_16957870_16958224	0	29	-7.61119	2.75402e-06	4.40215e-06	Down	Intron (ENSMUST00000186604/ENSMUSG00000101640, intron 1 of 2)	ENSMUSG00000101640	ENSMUST00000194790	Gm28376	-	-
1_16962522_16963045	524	1_16962522_16963045	-	37	0	8.52215	1.63617e-11	7.0045e-11	Up	Intron (ENSMUST00000186604/ENSMUSG00000101640, intron 1 of 2)	ENSMUSG00000101640	ENSMUST00000194790	Gm28376	-	-
1_16978070_16978308	239	1_16978070_16978308	-	29	0	8.17176	3.99443e-09	1.00658e-08	Up	Intron (ENSMUST00000186604/ENSMUSG00000101640, intron 1 of 2)	ENSMUSG00000101640	ENSMUST00000186024	Gm28376	-	-
1_16980476_16980788	313	1_16980476_16980788	-	39	0	8.59789	5.64977e-12	2.78967e-11	Up	Intron (ENSMUST00000186604/ENSMUSG00000101640, intron 1 of 2)	ENSMUSG00000101640	ENSMUST00000186024	Gm28376	-	-
1_16989265_16989668	404	-	1_16989265_16989668	0	32	-7.75251	9.08175e-07	1.53104e-06	Down	Intron (ENSMUST00000186604/ENSMUSG00000101640, intron 1 of 2)	ENSMUSG00000101640	ENSMUST00000186024	Gm28376	-	-
1_16993947_16994266	320	1_16993947_16994266	-	22	0	7.7748	4.1078e-07	7.32295e-07	Up	Intron (ENSMUST00000186604/ENSMUSG00000101640, intron 1 of 2)	ENSMUSG00000101640	ENSMUST00000186024	Gm28376	-	-
1_16995677_16996150	474	1_16995677_16996150	-	47	0	8.86645	5.41924e-14	4.56184e-13	Up	3' UTR	ENSMUSG00000042686	ENSMUST00000186024	Jph1	junctophilin 1	JP-1|Jp1
1_16996194_16996504	311	-	1_16996194_16996504	0	26	-7.4545	1.47851e-05	2.21227e-05	Down	3' UTR	ENSMUSG00000042686	ENSMUST00000186024	Jph1	junctophilin 1	JP-1|Jp1
1_16997152_16997688	537	1_16997152_16997688	-	61	0	9.24189	1.46208e-17	2.89511e-16	Up	3' UTR	ENSMUSG00000042686	ENSMUST00000186024	Jph1	junctophilin 1	JP-1|Jp1
1_17002856_17003198	343	-	1_17002856_17003198	0	30	-7.65985	1.5797e-06	2.60196e-06	Down	Intron (ENSMUST00000186604/ENSMUSG00000101640, intron 1 of 2)	ENSMUSG00000101640	ENSMUST00000186024	Gm28376	-	-
1_17003583_17003987	405	1_17003583_17003987	-	41	0	8.66986	1.97336e-12	1.10472e-11	Up	Exon (ENSMUST00000186024/ENSMUSG00000042686, exon 1 of 4)	ENSMUSG00000042686	ENSMUST00000186024	Jph1	junctophilin 1	JP-1|Jp1
1_17004267_17004541	275	1_17004267_17004541	-	39	0	8.59789	5.64977e-12	2.78967e-11	Up	Promoter (<=1kb)	ENSMUSG00000042686	ENSMUST00000186024	Jph1	junctophilin 1	JP-1|Jp1
1_17013627_17014111	485	-	1_17013627_17014111	0	43	-8.17707	4.08541e-09	1.01592e-08	Down	Intron (ENSMUST00000186604/ENSMUSG00000101640, intron 1 of 2)	ENSMUSG00000101640	ENSMUST00000186024	Gm28376	-	-
1_17014174_17014537	364	1_17014174_17014537	-	59	0	9.19387	5.93548e-17	1.01453e-15	Up	Intron (ENSMUST00000186604/ENSMUSG00000101640, intron 1 of 2)	ENSMUSG00000101640	ENSMUST00000186024	Gm28376	-	-
1_17017979_17018911	933	1_17018091_17018911	1_17017979_17018569	86	51	1.31428	8.83039e-05	0.000127132	Up	Intron (ENSMUST00000186604/ENSMUSG00000101640, intron 1 of 2)	ENSMUSG00000101640	ENSMUST00000186024	Gm28376	-	-
1_17022120_17022556	437	1_17022120_17022556	-	46	0	8.83549	8.98453e-14	7.11197e-13	Up	Intron (ENSMUST00000186604/ENSMUSG00000101640, intron 1 of 2)	ENSMUSG00000101640	ENSMUST00000186024	Gm28376	-	-
1_17026319_17026644	326	1_17026319_17026644	-	43	0	8.73841	4.15962e-13	2.73662e-12	Up	Intron (ENSMUST00000186604/ENSMUSG00000101640, intron 1 of 2)	ENSMUSG00000101640	ENSMUST00000186024	Gm28376	-	-
1_17027371_17028010	640	1_17027371_17028010	-	80	0	9.63251	8.90188e-22	4.71788e-20	Up	Intron (ENSMUST00000186604/ENSMUSG00000101640, intron 1 of 2)	ENSMUSG00000101640	ENSMUST00000186024	Gm28376	-	-
1_17028556_17029049	494	1_17028556_17029049	-	49	0	8.92644	1.20778e-14	1.17285e-13	Up	Intron (ENSMUST00000186604/ENSMUSG00000101640, intron 1 of 2)	ENSMUSG00000101640	ENSMUST00000186024	Gm28376	-	-
1_17035648_17035917	270	1_17035648_17035917	-	35	0	8.4422	8.24314e-11	3.08621e-10	Up	Intron (ENSMUST00000186604/ENSMUSG00000101640, intron 2 of 2)	ENSMUSG00000101640	ENSMUST00000186024	Gm28376	-	-
1_17039398_17039754	357	-	1_17039398_17039754	0	27	-7.50864	8.426e-06	1.282e-05	Down	Intron (ENSMUST00000186604/ENSMUSG00000101640, intron 2 of 2)	ENSMUSG00000101640	ENSMUST00000186024	Gm28376	-	-
1_17044328_17044601	274	1_17044328_17044601	-	30	0	8.2205	1.29729e-09	3.54454e-09	Up	Intron (ENSMUST00000186604/ENSMUSG00000101640, intron 2 of 2)	ENSMUSG00000101640	ENSMUST00000186024	Gm28376	-	-
1_17053751_17054594	844	1_17053751_17054594	-	91	0	9.81816	6.51625e-24	5.41089e-22	Up	Intron (ENSMUST00000186604/ENSMUSG00000101640, intron 2 of 2)	ENSMUSG00000101640	ENSMUST00000038382	Gm28376	-	-
1_17054829_17055176	348	1_17054829_17055176	-	41	0	8.66986	1.97336e-12	1.10472e-11	Up	Intron (ENSMUST00000186604/ENSMUSG00000101640, intron 2 of 2)	ENSMUSG00000101640	ENSMUST00000038382	Gm28376	-	-
1_17056853_17057212	360	1_17056853_17057212	-	37	0	8.52215	1.63617e-11	7.0045e-11	Up	Intron (ENSMUST00000186604/ENSMUSG00000101640, intron 2 of 2)	ENSMUSG00000101640	ENSMUST00000038382	Gm28376	-	-
1_17057579_17059258	1680	1_17057579_17059258	1_17058210_17058748	142	52	2.00916	4.56225e-11	1.90107e-10	Up	Intron (ENSMUST00000186604/ENSMUSG00000101640, intron 2 of 2)	ENSMUSG00000101640	ENSMUST00000038382	Gm28376	-	-
1_17060625_17061144	520	1_17060625_17061144	-	51	0	8.98404	4.49613e-15	4.86904e-14	Up	Intron (ENSMUST00000186604/ENSMUSG00000101640, intron 2 of 2)	ENSMUSG00000101640	ENSMUST00000038382	Gm28376	-	-
1_17069920_17070414	495	1_17069920_17070414	-	52	0	9.012	2.75344e-15	3.17747e-14	Up	Intron (ENSMUST00000186604/ENSMUSG00000101640, intron 2 of 2)	ENSMUSG00000101640	ENSMUST00000038382	Gm28376	-	-
1_17083334_17083740	407	1_17083334_17083740	-	33	0	8.35756	2.45934e-10	8.02848e-10	Up	Intron (ENSMUST00000186604/ENSMUSG00000101640, intron 2 of 2)	ENSMUSG00000101640	ENSMUST00000038382	Gm28376	-	-
1_17084023_17084430	408	1_17084023_17084430	-	39	0	8.59789	5.64977e-12	2.78967e-11	Up	Intron (ENSMUST00000186604/ENSMUSG00000101640, intron 2 of 2)	ENSMUSG00000101640	ENSMUST00000038382	Gm28376	-	-
1_17087696_17088050	355	1_17087696_17088050	-	50	0	8.95553	7.35991e-15	7.54998e-14	Up	Intron (ENSMUST00000186604/ENSMUSG00000101640, intron 2 of 2)	ENSMUSG00000101640	ENSMUST00000038382	Gm28376	-	-
1_17089343_17089865	523	1_17089343_17089865	-	52	0	9.012	2.75344e-15	3.17747e-14	Up	Intron (ENSMUST00000186604/ENSMUSG00000101640, intron 2 of 2)	ENSMUSG00000101640	ENSMUST00000038382	Gm28376	-	-
1_17090606_17091301	696	-	1_17090606_17091301	0	45	-8.24243	2.41201e-09	6.33597e-09	Down	Exon (ENSMUST00000038382/ENSMUSG00000042686, exon 2 of 5)	ENSMUSG00000042686	ENSMUST00000038382	Jph1	junctophilin 1	JP-1|Jp1
1_17091609_17092045	437	-	1_17091609_17092045	0	25	-7.39824	2.59951e-05	3.8153e-05	Down	Exon (ENSMUST00000186604/ENSMUSG00000101640, exon 3 of 3)	ENSMUSG00000101640	ENSMUST00000038382	Gm28376	-	-
1_17092917_17093236	320	1_17092917_17093236	-	36	0	8.48273	4.79413e-11	1.90587e-10	Up	Intron (ENSMUST00000038382/ENSMUSG00000042686, intron 4 of 4)	ENSMUSG00000042686	ENSMUST00000038382	Jph1	junctophilin 1	JP-1|Jp1
1_17093686_17094421	736	-	1_17093686_17094421	0	47	-8.30497	8.46962e-10	2.41856e-09	Down	Intron (ENSMUST00000038382/ENSMUSG00000042686, intron 4 of 4)	ENSMUSG00000042686	ENSMUST00000038382	Jph1	junctophilin 1	JP-1|Jp1
1_17095101_17095811	711	1_17095101_17095811	1_17095208_17095660	72	29	1.86952	4.27364e-07	7.61602e-07	Up	Intron (ENSMUST00000038382/ENSMUSG00000042686, intron 4 of 4)	ENSMUSG00000042686	ENSMUST00000038382	Jph1	junctophilin 1	JP-1|Jp1
1_17096183_17097895	1713	1_17096999_17097788	1_17096183_17097895	82	446	-1.8791	1.06532e-12	6.774e-12	Down	Promoter (<=1kb)	ENSMUSG00000042686	ENSMUST00000038382	Jph1	junctophilin 1	JP-1|Jp1
1_17100651_17101083	433	1_17100651_17101083	-	36	0	8.48273	4.79413e-11	1.90587e-10	Up	Distal Intergenic	ENSMUSG00000042686	ENSMUST00000038382	Jph1	junctophilin 1	JP-1|Jp1
1_17102393_17102810	418	-	1_17102393_17102810	0	36	-7.9217	1.01568e-07	1.94955e-07	Down	Distal Intergenic	ENSMUSG00000042686	ENSMUST00000038382	Jph1	junctophilin 1	JP-1|Jp1
1_17103792_17104102	311	-	1_17103792_17104102	0	32	-7.75251	9.08175e-07	1.53104e-06	Down	Distal Intergenic	ENSMUSG00000042686	ENSMUST00000038382	Jph1	junctophilin 1	JP-1|Jp1
1_17104484_17104989	506	-	1_17104484_17104989	0	35	-7.88122	1.75007e-07	3.29918e-07	Down	Distal Intergenic	ENSMUSG00000042686	ENSMUST00000038382	Jph1	junctophilin 1	JP-1|Jp1
1_17105603_17105848	246	1_17105603_17105848	-	32	0	8.31331	4.26767e-10	1.30949e-09	Up	Distal Intergenic	ENSMUSG00000042686	ENSMUST00000038382	Jph1	junctophilin 1	JP-1|Jp1
1_17109193_17109613	421	1_17109193_17109613	-	41	0	8.66986	1.97336e-12	1.10472e-11	Up	Distal Intergenic	ENSMUSG00000042686	ENSMUST00000038382	Jph1	junctophilin 1	JP-1|Jp1
1_17161347_17161687	341	-	1_17161347_17161687	0	30	-7.65985	1.5797e-06	2.60196e-06	Down	3' UTR	ENSMUSG00000025777	ENSMUST00000189465	Gdap1	ganglioside-induced differentiation-associated-protein 1	-
1_17162222_17163199	978	-	1_17162222_17163199	0	87	-9.19122	6.51922e-17	1.10427e-15	Down	3' UTR	ENSMUSG00000025777	ENSMUST00000189465	Gdap1	ganglioside-induced differentiation-associated-protein 1	-
1_17168674_17169120	447	1_17168674_17169120	-	50	0	8.95553	7.35991e-15	7.54998e-14	Up	Promoter (<=1kb)	ENSMUSG00000099899	ENSMUST00000187817	Gm28784	-	-
1_17169634_17170163	530	1_17169634_17170163	-	52	0	9.012	2.75344e-15	3.17747e-14	Up	Exon (ENSMUST00000187817/ENSMUSG00000099899, exon 2 of 4)	ENSMUSG00000099899	ENSMUST00000187817	Gm28784	-	-
1_17172053_17172447	395	-	1_17172053_17172447	0	42	-8.14324	6.93678e-09	1.66011e-08	Down	Intron (ENSMUST00000187817/ENSMUSG00000099899, intron 3 of 3)	ENSMUSG00000099899	ENSMUST00000187817	Gm28784	-	-
1_17175173_17175463	291	1_17175173_17175463	-	28	0	8.12131	7.04361e-09	1.66011e-08	Up	Downstream (2-3kb)	ENSMUSG00000099899	ENSMUST00000187817	Gm28784	-	-
1_17198301_17198870	570	1_17198301_17198870	-	51	0	8.98404	4.49613e-15	4.86904e-14	Up	Distal Intergenic	ENSMUSG00000099899	ENSMUST00000187817	Gm28784	-	-
1_17201401_17202141	741	1_17201401_17202083	1_17201645_17202141	68	46	1.12433	0.00142836	0.00195794	Up	Distal Intergenic	ENSMUSG00000099899	ENSMUST00000187817	Gm28784	-	-
1_17213418_17213656	239	1_17213418_17213656	-	35	0	8.4422	8.24314e-11	3.08621e-10	Up	Distal Intergenic	ENSMUSG00000100272	ENSMUST00000187478	Gm28785	-	-
1_17217712_17218357	646	1_17217712_17218357	-	77	0	9.57744	4.84905e-21	2.2224e-19	Up	Distal Intergenic	ENSMUSG00000100272	ENSMUST00000187478	Gm28785	-	-
1_17227227_17229121	1895	1_17227326_17227844;1_17228032_17229121	1_17227227_17228320	140	94	1.1364	6.52444e-05	9.43095e-05	Up	Distal Intergenic	ENSMUSG00000100272	ENSMUST00000187478	Gm28785	-	-
1_17231355_17231759	405	1_17231355_17231759	-	36	0	8.48273	4.79413e-11	1.90587e-10	Up	Distal Intergenic	ENSMUSG00000100272	ENSMUST00000187478	Gm28785	-	-
1_17232841_17234240	1400	1_17232841_17234098	1_17233362_17234240	88	61	1.08978	0.000708295	0.000984955	Up	Distal Intergenic	ENSMUSG00000100272	ENSMUST00000187478	Gm28785	-	-
1_17252339_17252663	325	1_17252339_17252663	-	36	0	8.48273	4.79413e-11	1.90587e-10	Up	Distal Intergenic	ENSMUSG00000100272	ENSMUST00000187478	Gm28785	-	-
1_17253216_17253970	755	-	1_17253216_17253970	0	41	-8.1086	1.18072e-08	2.73413e-08	Down	Distal Intergenic	ENSMUSG00000100272	ENSMUST00000187478	Gm28785	-	-
1_17254439_17254888	450	-	1_17254439_17254888	0	35	-7.88122	1.75007e-07	3.29918e-07	Down	Distal Intergenic	ENSMUSG00000100272	ENSMUST00000187478	Gm28785	-	-
1_17263673_17264020	348	1_17263673_17264020	-	30	0	8.2205	1.29729e-09	3.54454e-09	Up	Distal Intergenic	ENSMUSG00000100272	ENSMUST00000187478	Gm28785	-	-
1_17265159_17265637	479	1_17265159_17265637	-	42	0	8.70454	1.17118e-12	7.07889e-12	Up	Distal Intergenic	ENSMUSG00000100272	ENSMUST00000187478	Gm28785	-	-
1_17268411_17269940	1530	1_17268411_17268740;1_17269024_17269940	1_17268682_17269096	147	42	2.36619	8.02757e-14	6.65884e-13	Up	Distal Intergenic	ENSMUSG00000100272	ENSMUST00000187478	Gm28785	-	-
1_17270544_17270800	257	1_17270544_17270800	-	28	0	8.12131	7.04361e-09	1.66011e-08	Up	Distal Intergenic	ENSMUSG00000100272	ENSMUST00000187478	Gm28785	-	-
1_17271756_17272198	443	-	1_17271756_17272198	0	25	-7.39824	2.59951e-05	3.8153e-05	Down	Distal Intergenic	ENSMUSG00000100272	ENSMUST00000187478	Gm28785	-	-
1_17273461_17274112	652	-	1_17273461_17274112	0	51	-8.42245	1.79489e-10	6.15694e-10	Down	Distal Intergenic	ENSMUSG00000100272	ENSMUST00000187478	Gm28785	-	-
1_17300429_17300755	327	1_17300429_17300755	-	30	0	8.2205	1.29729e-09	3.54454e-09	Up	Distal Intergenic	ENSMUSG00000100272	ENSMUST00000187478	Gm28785	-	-
1_17307393_17307631	239	1_17307393_17307631	-	32	0	8.31331	4.26767e-10	1.30949e-09	Up	Distal Intergenic	ENSMUSG00000100272	ENSMUST00000187478	Gm28785	-	-
1_17307633_17308097	465	-	1_17307633_17308097	0	38	-7.99939	5.909e-08	1.17873e-07	Down	Distal Intergenic	ENSMUSG00000100272	ENSMUST00000187478	Gm28785	-	-
1_17338464_17339004	541	-	1_17338464_17339004	0	28	-7.56082	4.812e-06	7.49864e-06	Down	Distal Intergenic	ENSMUSG00000100398	ENSMUST00000188959	Gm5251	-	-
1_17354766_17355615	850	-	1_17354766_17355615	0	55	-8.53107	2.34568e-11	9.9103e-11	Down	Distal Intergenic	ENSMUSG00000100398	ENSMUST00000188959	Gm5251	-	-
1_17355661_17355931	271	1_17355661_17355931	-	43	0	8.73841	4.15962e-13	2.73662e-12	Up	Distal Intergenic	ENSMUSG00000100398	ENSMUST00000188959	Gm5251	-	-
1_17393651_17393933	283	1_17393651_17393933	-	22	0	7.7748	4.1078e-07	7.32295e-07	Up	Promoter (1-2kb)	ENSMUSG00000100398	ENSMUST00000188959	Gm5251	-	-
1_17488223_17488606	384	-	1_17488223_17488606	0	28	-7.56082	4.812e-06	7.49864e-06	Down	Distal Intergenic	ENSMUSG00000089534	ENSMUST00000158909	Gm25166	-	-
1_17489439_17489861	423	-	1_17489439_17489861	0	63	-8.7265	7.2951e-13	4.64356e-12	Down	Distal Intergenic	ENSMUSG00000089534	ENSMUST00000158909	Gm25166	-	-
1_17491716_17492016	301	1_17491716_17492016	-	38	0	8.56052	9.60067e-12	4.38615e-11	Up	Distal Intergenic	ENSMUSG00000089534	ENSMUST00000158909	Gm25166	-	-
1_17492491_17492738	248	1_17492491_17492738	-	27	0	8.06903	1.24618e-08	2.79243e-08	Up	Distal Intergenic	ENSMUSG00000089534	ENSMUST00000158909	Gm25166	-	-
1_17495238_17495606	369	-	1_17495238_17495606	0	25	-7.39824	2.59951e-05	3.8153e-05	Down	Distal Intergenic	ENSMUSG00000089534	ENSMUST00000158909	Gm25166	-	-
1_17503124_17503441	318	-	1_17503124_17503441	0	31	-7.70693	9.08175e-07	1.53104e-06	Down	Distal Intergenic	ENSMUSG00000089534	ENSMUST00000158909	Gm25166	-	-
1_17528919_17529230	312	-	1_17528919_17529230	0	28	-7.56082	4.812e-06	7.49864e-06	Down	Distal Intergenic	ENSMUSG00000089534	ENSMUST00000158909	Gm25166	-	-
1_17534936_17535456	521	-	1_17534936_17535456	0	51	-8.42245	1.79489e-10	6.15694e-10	Down	Distal Intergenic	ENSMUSG00000089534	ENSMUST00000158909	Gm25166	-	-
1_17536767_17537238	472	-	1_17536767_17537238	0	26	-7.4545	1.47851e-05	2.21227e-05	Down	Distal Intergenic	ENSMUSG00000089534	ENSMUST00000158909	Gm25166	-	-
1_17537367_17537627	261	1_17537367_17537627	-	30	0	8.2205	1.29729e-09	3.54454e-09	Up	Distal Intergenic	ENSMUSG00000089534	ENSMUST00000158909	Gm25166	-	-
1_17540904_17541266	363	-	1_17540904_17541266	0	29	-7.61119	2.75402e-06	4.40215e-06	Down	Distal Intergenic	ENSMUSG00000089534	ENSMUST00000158909	Gm25166	-	-
1_17578541_17578926	386	-	1_17578541_17578926	0	28	-7.56082	4.812e-06	7.49864e-06	Down	Distal Intergenic	ENSMUSG00000067780	ENSMUST00000088476	Pi15	peptidase inhibitor 15	P24TI|P25TI|PI-15|SugarCrisp
1_17582802_17583118	317	-	1_17582802_17583118	0	34	-7.83958	3.02271e-07	5.50653e-07	Down	Distal Intergenic	ENSMUSG00000067780	ENSMUST00000088476	Pi15	peptidase inhibitor 15	P24TI|P25TI|PI-15|SugarCrisp
1_17586080_17586459	380	-	1_17586080_17586459	0	36	-7.9217	1.01568e-07	1.94955e-07	Down	Distal Intergenic	ENSMUSG00000067780	ENSMUST00000088476	Pi15	peptidase inhibitor 15	P24TI|P25TI|PI-15|SugarCrisp
1_17603057_17603464	408	-	1_17603057_17603464	0	34	-7.83958	3.02271e-07	5.50653e-07	Down	Intron (ENSMUST00000088476/ENSMUSG00000067780, intron 2 of 5)	ENSMUSG00000067780	ENSMUST00000088476	Pi15	peptidase inhibitor 15	P24TI|P25TI|PI-15|SugarCrisp
1_17634037_17634708	672	-	1_17634037_17634708	0	74	-8.95817	9.9007e-15	1.00274e-13	Down	Intron (ENSMUST00000186267/ENSMUSG00000100053, intron 2 of 3)	ENSMUSG00000100053	ENSMUST00000186267	Gm28154	predicted gene 28154	-
1_17646703_17647013	311	-	1_17646703_17647013	0	27	-7.50864	8.426e-06	1.282e-05	Down	Distal Intergenic	ENSMUSG00000100053	ENSMUST00000186267	Gm28154	predicted gene 28154	-
1_17659918_17660228	311	-	1_17659918_17660228	0	26	-7.4545	1.47851e-05	2.21227e-05	Down	Distal Intergenic	ENSMUSG00000100053	ENSMUST00000186267	Gm28154	predicted gene 28154	-
1_17664619_17673845	9227	1_17664782_17665309;1_17665769_17667152;1_17668518_17669964;1_17670342_17671537;1_17671731_17672026	1_17664619_17673845	519	1538	-1.00415	4.42075e-06	7.03458e-06	Down	Downstream (2-3kb)	ENSMUSG00000100053	ENSMUST00000186267	Gm28154	predicted gene 28154	-
1_17676278_17676971	694	1_17676278_17676971	1_17676320_17676699	81	35	1.76919	4.95797e-07	8.8242e-07	Up	Exon (ENSMUST00000155588/ENSMUSG00000085125, exon 7 of 7)	ENSMUSG00000085125	ENSMUST00000186267	Gm16070	predicted gene 16070	-
1_17677596_17677954	359	-	1_17677596_17677954	0	29	-7.61119	2.75402e-06	4.40215e-06	Down	Intron (ENSMUST00000155588/ENSMUSG00000085125, intron 1 of 6)	ENSMUSG00000085125	ENSMUST00000186267	Gm16070	predicted gene 16070	-
1_17691301_17692167	867	1_17691462_17692167	1_17691301_17691775	63	39	1.25164	0.000576244	0.000804342	Up	Intron (ENSMUST00000155588/ENSMUSG00000085125, intron 1 of 6)	ENSMUSG00000085125	ENSMUST00000159958	Gm16070	predicted gene 16070	-
1_17692748_17693107	360	-	1_17692748_17693107	0	44	-8.21012	2.41201e-09	6.33597e-09	Down	Exon (ENSMUST00000127328/ENSMUSG00000085125, exon 5 of 5)	ENSMUSG00000085125	ENSMUST00000159958	Gm16070	predicted gene 16070	-
1_17693818_17694056	239	1_17693818_17694056	-	28	0	8.12131	7.04361e-09	1.66011e-08	Up	Exon (ENSMUST00000127328/ENSMUSG00000085125, exon 5 of 5)	ENSMUSG00000085125	ENSMUST00000159958	Gm16070	predicted gene 16070	-
1_17695595_17695978	384	-	1_17695595_17695978	0	30	-7.65985	1.5797e-06	2.60196e-06	Down	Exon (ENSMUST00000127328/ENSMUSG00000085125, exon 5 of 5)	ENSMUSG00000085125	ENSMUST00000159958	Gm16070	predicted gene 16070	-
1_17706073_17707071	999	-	1_17706073_17707071	0	74	-8.95817	9.9007e-15	1.00274e-13	Down	Intron (ENSMUST00000155588/ENSMUSG00000085125, intron 2 of 6)	ENSMUSG00000085125	ENSMUST00000159958	Gm16070	predicted gene 16070	-
1_17712463_17712751	289	1_17712463_17712751	-	33	0	8.35756	2.45934e-10	8.02848e-10	Up	Exon (ENSMUST00000155588/ENSMUSG00000085125, exon 3 of 7)	ENSMUSG00000085125	ENSMUST00000159958	Gm16070	predicted gene 16070	-
1_17806380_17806678	299	1_17806380_17806678	-	26	0	8.01479	2.21221e-08	4.74092e-08	Up	Promoter (1-2kb)	ENSMUSG00000099895	ENSMUST00000189853	Gm28153	-	-
1_17808319_17808669	351	-	1_17808319_17808669	0	37	-7.96106	5.909e-08	1.17873e-07	Down	Distal Intergenic	ENSMUSG00000099895	ENSMUST00000189853	Gm28153	-	-
1_17865449_17866153	705	1_17865449_17866153	-	47	0	8.86645	5.41924e-14	4.56184e-13	Up	Distal Intergenic	ENSMUSG00000099895	ENSMUST00000189853	Gm28153	-	-
1_17922491_17923652	1162	1_17922491_17923652	-	78	0	9.59603	2.07007e-21	1.00969e-19	Up	Distal Intergenic	ENSMUSG00000100554	ENSMUST00000190885	Gm7690	-	-
1_17924363_17925679	1317	1_17924363_17925679	-	136	0	10.3973	3.00607e-32	1.19288e-29	Up	Distal Intergenic	ENSMUSG00000100554	ENSMUST00000190885	Gm7690	-	-
1_17925842_17926182	341	-	1_17925842_17926182	0	33	-7.79671	5.23325e-07	9.17763e-07	Down	Distal Intergenic	ENSMUSG00000100554	ENSMUST00000190885	Gm7690	-	-
1_17926207_17926731	525	1_17926207_17926731	-	33	0	8.35756	2.45934e-10	8.02848e-10	Up	Distal Intergenic	ENSMUSG00000100554	ENSMUST00000190885	Gm7690	-	-
1_17926984_17927297	314	1_17926984_17927297	-	36	0	8.48273	4.79413e-11	1.90587e-10	Up	Distal Intergenic	ENSMUSG00000100554	ENSMUST00000190885	Gm7690	-	-
1_17937492_17937831	340	1_17937492_17937831	-	44	0	8.7715	2.48909e-13	1.74548e-12	Up	Distal Intergenic	ENSMUSG00000100554	ENSMUST00000190885	Gm7690	-	-
1_17938031_17938606	576	-	1_17938031_17938606	0	42	-8.14324	6.93678e-09	1.66011e-08	Down	Distal Intergenic	ENSMUSG00000100554	ENSMUST00000190885	Gm7690	-	-
1_17940150_17940460	311	-	1_17940150_17940460	0	32	-7.75251	9.08175e-07	1.53104e-06	Down	Distal Intergenic	ENSMUSG00000100554	ENSMUST00000190885	Gm7690	-	-
1_17941863_17942323	461	1_17941863_17942323	-	42	0	8.70454	1.17118e-12	7.07889e-12	Up	Distal Intergenic	ENSMUSG00000100554	ENSMUST00000190885	Gm7690	-	-
1_17978086_17978425	340	1_17978086_17978425	-	31	0	8.26765	7.42892e-10	2.14936e-09	Up	Distal Intergenic	ENSMUSG00000099591	ENSMUST00000185706	Gm17969	-	-
1_17981025_17981487	463	1_17981025_17981487	-	55	0	9.09277	3.96752e-16	5.44693e-15	Up	Distal Intergenic	ENSMUSG00000099591	ENSMUST00000185706	Gm17969	-	-
1_17981682_17982197	516	-	1_17981682_17982197	0	40	-8.0731	2.01468e-08	4.43681e-08	Down	Distal Intergenic	ENSMUSG00000099591	ENSMUST00000185706	Gm17969	-	-
1_18005623_18005952	330	1_18005623_18005952	-	32	0	8.31331	4.26767e-10	1.30949e-09	Up	Downstream (<1kb)	ENSMUSG00000099473	ENSMUST00000190763	Gm18775	-	-
1_18012138_18012773	636	-	1_18012138_18012773	0	51	-8.42245	1.79489e-10	6.15694e-10	Down	Exon (ENSMUST00000185773/ENSMUSG00000102001, exon 2 of 3)	ENSMUSG00000102001	ENSMUST00000185773	Gm28755	-	-
1_18026031_18026475	445	1_18026031_18026475	-	47	0	8.86645	5.41924e-14	4.56184e-13	Up	Distal Intergenic	ENSMUSG00000102001	ENSMUST00000185773	Gm28755	-	-
1_18028586_18028975	390	-	1_18028586_18028975	0	29	-7.61119	2.75402e-06	4.40215e-06	Down	Distal Intergenic	ENSMUSG00000102001	ENSMUST00000185773	Gm28755	-	-
1_18029868_18032932	3065	1_18029994_18030988;1_18031327_18032932	1_18029868_18030324;1_18030494_18031609	273	176	1.19559	1.76184e-06	2.89852e-06	Up	Downstream (1-2kb)	ENSMUSG00000102001	ENSMUST00000185773	Gm28755	-	-
1_18033811_18034049	239	1_18033811_18034049	-	23	0	7.83864	2.27396e-07	4.21299e-07	Up	Downstream (<1kb)	ENSMUSG00000102001	ENSMUST00000185773	Gm28755	-	-
1_18034463_18034816	354	-	1_18034463_18034816	0	39	-8.03672	3.4461e-08	7.26383e-08	Down	Downstream (<1kb)	ENSMUSG00000102001	ENSMUST00000185773	Gm28755	-	-
1_18104904_18107038	2135	1_18106428_18106846	1_18104904_18107038	43	154	-1.27558	6.21471e-05	8.99278e-05	Down	Distal Intergenic	ENSMUSG00000025774	ENSMUST00000115340	Crisp4	cysteine-rich secretory protein 4	9230112K08Rik
1_18220858_18221289	432	-	1_18220858_18221289	0	24	-7.33971	2.47519e-06	4.01712e-06	Down	Intron (ENSMUST00000126871/ENSMUSG00000070977, intron 1 of 1)	ENSMUSG00000070977	ENSMUST00000126871	Defb44-ps	defensin beta 44, pseudogene	Defb44|Defb49|Defb49-ps|EG574082
1_18223826_18224251	426	-	1_18223826_18224251	0	53	-8.47778	6.45764e-11	2.53503e-10	Down	Promoter (<=1kb)	ENSMUSG00000070977	ENSMUST00000126871	Defb44-ps	defensin beta 44, pseudogene	Defb44|Defb49|Defb49-ps|EG574082
1_18245400_18245737	338	-	1_18245400_18245737	0	33	-7.79671	5.23325e-07	9.17763e-07	Down	Distal Intergenic	ENSMUSG00000073735	ENSMUST00000097818	Defb18	defensin beta 18	BD-18|EG654460|mBD-18
1_18246000_18246282	283	1_18246000_18246282	-	21	0	7.708	4.1078e-07	7.32295e-07	Up	Distal Intergenic	ENSMUSG00000073735	ENSMUST00000097818	Defb18	defensin beta 18	BD-18|EG654460|mBD-18
1_18267234_18268851	1618	-	1_18267234_18268851	0	191	-10.3244	8.56072e-30	2.09945e-27	Down	Distal Intergenic	ENSMUSG00000067773	ENSMUST00000088463	Defb41	defensin beta 41	9230102D03Rik|BD-17|Bd-41|Defb16|Defb17|Gm15386
1_18269099_18270517	1419	1_18269189_18269452	1_18269099_18270517	34	153	-1.6041	1.59763e-06	2.63116e-06	Down	Distal Intergenic	ENSMUSG00000067773	ENSMUST00000088463	Defb41	defensin beta 41	9230102D03Rik|BD-17|Bd-41|Defb16|Defb17|Gm15386
1_18287680_18288778	1099	-	1_18287680_18288778	0	76	-8.99656	3.89954e-15	4.40038e-14	Down	Distal Intergenic	ENSMUSG00000101738	ENSMUST00000187966	Gm29006	-	-
1_19972842_19973294	453	-	1_19972842_19973294	0	30	-7.65985	1.5797e-06	2.60196e-06	Down	Distal Intergenic	ENSMUSG00000104095	ENSMUST00000194347	Gm37315	-	-
1_20774298_20774536	239	1_20774298_20774536	-	19	0	7.56433	1.3552e-06	2.2703e-06	Up	Downstream (2-3kb)	ENSMUSG00000041872	ENSMUST00000191111	Il17f	interleukin 17F	C87042|IL-17F
1_20805634_20805919	286	1_20805634_20805919	-	32	0	8.31331	4.26767e-10	1.30949e-09	Up	Promoter (<=1kb)	ENSMUSG00000041859	ENSMUST00000190421	Mcm3	minichromosome maintenance complex component 3	AL033361|C80350|Mcmd|P1|p1.m
1_20815910_20816379	470	-	1_20815910_20816379	0	32	-7.75251	9.08175e-07	1.53104e-06	Down	Intron (ENSMUST00000053266/ENSMUSG00000041859, intron 13 of 16)	ENSMUSG00000041859	ENSMUST00000185296	Mcm3	minichromosome maintenance complex component 3	AL033361|C80350|Mcmd|P1|p1.m
1_20818030_20818340	311	-	1_20818030_20818340	0	27	-7.50864	8.426e-06	1.282e-05	Down	Intron (ENSMUST00000053266/ENSMUSG00000041859, intron 16 of 16)	ENSMUSG00000041859	ENSMUST00000185296	Mcm3	minichromosome maintenance complex component 3	AL033361|C80350|Mcmd|P1|p1.m
1_20818612_20820919	2308	1_20818612_20820236;1_20820558_20820796	1_20818777_20820919	192	653	-1.20259	3.76234e-07	6.84462e-07	Down	Promoter (<=1kb)	ENSMUSG00000041859	ENSMUST00000053266	Mcm3	minichromosome maintenance complex component 3	AL033361|C80350|Mcmd|P1|p1.m
1_20861057_20861540	484	1_20861057_20861540	-	51	0	8.98404	4.49613e-15	4.86904e-14	Up	Distal Intergenic	ENSMUSG00000088858	ENSMUST00000158233	Gm24723	-	-
1_20863487_20864322	836	1_20863487_20864322	1_20863637_20864147	88	40	1.69675	6.39913e-07	1.12051e-06	Up	Distal Intergenic	ENSMUSG00000088858	ENSMUST00000158233	Gm24723	-	-
1_20873199_20874352	1154	-	1_20873199_20874352	0	97	-9.34794	3.00402e-17	5.62136e-16	Down	Distal Intergenic	ENSMUSG00000025931	ENSMUST00000189400	Paqr8	progestin and adipoQ receptor family member VIII	1700019B16Rik|3110001D06Rik
1_20875591_20875954	364	-	1_20875591_20875954	0	24	-7.33971	2.47519e-06	4.01712e-06	Down	Distal Intergenic	ENSMUSG00000025931	ENSMUST00000189400	Paqr8	progestin and adipoQ receptor family member VIII	1700019B16Rik|3110001D06Rik
1_20892244_20893474	1231	1_20892275_20892799;1_20893085_20893474	1_20892244_20893130	117	78	1.14641	0.000126278	0.000180687	Up	Intron (ENSMUST00000189400/ENSMUSG00000025931, intron 1 of 2)	ENSMUSG00000025931	ENSMUST00000189400	Paqr8	progestin and adipoQ receptor family member VIII	1700019B16Rik|3110001D06Rik
1_20899599_20900033	435	1_20899599_20900033	-	46	0	8.83549	8.98453e-14	7.11197e-13	Up	Intron (ENSMUST00000189400/ENSMUSG00000025931, intron 1 of 2)	ENSMUSG00000025931	ENSMUST00000189400	Paqr8	progestin and adipoQ receptor family member VIII	1700019B16Rik|3110001D06Rik
1_20901833_20903697	1865	1_20901833_20902172;1_20902415_20902723;1_20903002_20903697	1_20902129_20903326	127	79	1.24629	1.94431e-05	2.88911e-05	Up	Intron (ENSMUST00000189400/ENSMUSG00000025931, intron 1 of 2)	ENSMUSG00000025931	ENSMUST00000189400	Paqr8	progestin and adipoQ receptor family member VIII	1700019B16Rik|3110001D06Rik
1_20913178_20913512	335	1_20913178_20913512	-	37	0	8.52215	1.63617e-11	7.0045e-11	Up	Intron (ENSMUST00000189400/ENSMUSG00000025931, intron 1 of 2)	ENSMUSG00000025931	ENSMUST00000104126	Paqr8	progestin and adipoQ receptor family member VIII	1700019B16Rik|3110001D06Rik
1_20936722_20937346	625	-	1_20936722_20937346	0	48	-8.33525	5.03731e-10	1.52689e-09	Down	3' UTR	ENSMUSG00000100929	ENSMUST00000185639	Gm28064	-	-
1_20951016_20951375	360	-	1_20951016_20951375	0	42	-8.14324	6.93678e-09	1.66011e-08	Down	Promoter (<=1kb)	ENSMUSG00000041809	ENSMUST00000160782	Efhc1	EF-hand domain (C-terminal) containing 1	1700029F22Rik|mRib72-1|myoclonin1
1_21010292_21010535	244	1_21010292_21010535	-	21	0	7.708	4.1078e-07	7.32295e-07	Up	Intron (ENSMUST00000037998/ENSMUSG00000041779, intron 7 of 10)	ENSMUSG00000041779	ENSMUST00000187210	Tram2	translocating chain-associating membrane protein 2	C330003D03Rik
1_21045097_21045533	437	1_21045097_21045533	-	37	0	8.52215	1.63617e-11	7.0045e-11	Up	Promoter (1-2kb)	ENSMUSG00000041779	ENSMUST00000187210	Tram2	translocating chain-associating membrane protein 2	C330003D03Rik
1_21052458_21052831	374	1_21052458_21052831	-	45	0	8.80385	1.49345e-13	1.11491e-12	Up	Intron (ENSMUST00000037998/ENSMUSG00000041779, intron 10 of 10)	ENSMUSG00000041779	ENSMUST00000187210	Tram2	translocating chain-associating membrane protein 2	C330003D03Rik
1_21054052_21054290	239	1_21054052_21054290	-	25	0	7.95843	3.94049e-08	8.10452e-08	Up	Intron (ENSMUST00000037998/ENSMUSG00000041779, intron 10 of 10)	ENSMUSG00000041779	ENSMUST00000187210	Tram2	translocating chain-associating membrane protein 2	C330003D03Rik
1_21067149_21067570	422	1_21067149_21067570	-	41	0	8.66986	1.97336e-12	1.10472e-11	Up	Intron (ENSMUST00000037998/ENSMUSG00000041779, intron 10 of 10)	ENSMUSG00000041779	ENSMUST00000037998	Tram2	translocating chain-associating membrane protein 2	C330003D03Rik
1_21075253_21075615	363	-	1_21075253_21075615	0	21	-7.14833	1.54285e-05	2.29874e-05	Down	Intron (ENSMUST00000037998/ENSMUSG00000041779, intron 10 of 10)	ENSMUSG00000041779	ENSMUST00000037998	Tram2	translocating chain-associating membrane protein 2	C330003D03Rik
1_21079405_21079825	421	-	1_21079405_21079825	0	112	-9.55508	1.42636e-19	4.73863e-18	Down	Promoter (<=1kb)	ENSMUSG00000041779	ENSMUST00000037998	Tram2	translocating chain-associating membrane protein 2	C330003D03Rik
1_21218500_21218841	342	-	1_21218500_21218841	0	43	-8.17707	4.08541e-09	1.01592e-08	Down	Promoter (<=1kb)	ENSMUSG00000025933	ENSMUST00000027065	Tmem14a	transmembrane protein 14A	5730496E24Rik|C85783|PTD011
1_21240105_21240459	355	-	1_21240105_21240459	0	44	-8.21012	2.41201e-09	6.33597e-09	Down	Promoter (<=1kb)	ENSMUSG00000025934	ENSMUST00000027067	Gsta3	glutathione S-transferase, alpha 3	Gst2-3
1_22375537_22375853	317	1_22375537_22375853	-	31	0	8.26765	7.42892e-10	2.14936e-09	Up	Intron (ENSMUST00000081544/ENSMUSG00000041670, intron 7 of 31)	ENSMUSG00000041670	ENSMUST00000185942	Rims1	regulating synaptic membrane exocytosis 1	C030033M19Rik|RIM1|RIM1a|RIM1alpha|Rab3ip1|Rim|Serg1|mKIAA0340
1_22376282_22377256	975	1_22376282_22377256	1_22376796_22377184	126	34	2.44762	3.00803e-13	2.08825e-12	Up	Intron (ENSMUST00000081544/ENSMUSG00000041670, intron 7 of 31)	ENSMUSG00000041670	ENSMUST00000185942	Rims1	regulating synaptic membrane exocytosis 1	C030033M19Rik|RIM1|RIM1a|RIM1alpha|Rab3ip1|Rim|Serg1|mKIAA0340
1_22378635_22379301	667	1_22378635_22379301	-	49	0	8.92644	1.20778e-14	1.17285e-13	Up	Intron (ENSMUST00000081544/ENSMUSG00000041670, intron 7 of 31)	ENSMUSG00000041670	ENSMUST00000185942	Rims1	regulating synaptic membrane exocytosis 1	C030033M19Rik|RIM1|RIM1a|RIM1alpha|Rab3ip1|Rim|Serg1|mKIAA0340
1_23371589_23371983	395	1_23371589_23371983	-	27	0	8.06903	1.24618e-08	2.79243e-08	Up	Intron (ENSMUST00000027343/ENSMUSG00000026158, intron 1 of 6)	ENSMUSG00000026158	ENSMUST00000186064	Ogfrl1	opioid growth factor receptor-like 1	2210417C17Rik
1_23383570_23383882	313	1_23383570_23383882	-	39	0	8.59789	5.64977e-12	2.78967e-11	Up	Promoter (<=1kb)	ENSMUSG00000026158	ENSMUST00000027343	Ogfrl1	opioid growth factor receptor-like 1	2210417C17Rik
1_24098898_24099316	419	-	1_24098898_24099316	0	28	-7.56082	4.812e-06	7.49864e-06	Down	Intron (ENSMUST00000187752/ENSMUSG00000026153, intron 20 of 20)	ENSMUSG00000026153	ENSMUST00000187369	Fam135a	family with sequence similarity 135, member A	4921533L14Rik|AI256732|AI835491
1_24099571_24100325	755	-	1_24099571_24100325	0	144	-9.91723	4.81931e-24	4.10098e-22	Down	Promoter (<=1kb)	ENSMUSG00000026153	ENSMUST00000187752	Fam135a	family with sequence similarity 135, member A	4921533L14Rik|AI256732|AI835491
1_24100586_24101529	944	-	1_24100586_24101529	0	104	-9.44832	2.45727e-18	6.21542e-17	Down	Promoter (<=1kb)	ENSMUSG00000102398	ENSMUST00000192408	Gm37580	-	-
1_24677896_24679140	1245	1_24678731_24679020	1_24677896_24679140	36	233	-2.12819	1.28149e-11	5.84379e-11	Down	Promoter (<=1kb)	ENSMUSG00000073725	ENSMUST00000191471	Lmbrd1	LMBR1 domain containing 1	0910001K20Rik|AV347960
1_24700671_24700934	264	1_24700671_24700934	-	34	0	8.4005	1.42164e-10	4.99774e-10	Up	Intron (ENSMUST00000191471/ENSMUSG00000073725, intron 3 of 15)	ENSMUSG00000073725	ENSMUST00000095062	Lmbrd1	LMBR1 domain containing 1	0910001K20Rik|AV347960
1_24738906_24739250	345	1_24738906_24739250	-	42	0	8.70454	1.17118e-12	7.07889e-12	Up	Intron (ENSMUST00000191471/ENSMUSG00000073725, intron 9 of 15)	ENSMUSG00000073725	ENSMUST00000190195	Lmbrd1	LMBR1 domain containing 1	0910001K20Rik|AV347960
1_24740532_24741040	509	1_24740542_24741040	1_24740532_24740976	68	40	1.32526	0.000224545	0.0003185	Up	Intron (ENSMUST00000191471/ENSMUSG00000073725, intron 9 of 15)	ENSMUSG00000073725	ENSMUST00000190195	Lmbrd1	LMBR1 domain containing 1	0910001K20Rik|AV347960
1_24742685_24743095	411	1_24742685_24743095	-	31	0	8.26765	7.42892e-10	2.14936e-09	Up	Promoter (1-2kb)	ENSMUSG00000073725	ENSMUST00000190195	Lmbrd1	LMBR1 domain containing 1	0910001K20Rik|AV347960
1_24751441_24751698	258	1_24751441_24751698	-	25	0	7.95843	3.94049e-08	8.10452e-08	Up	Intron (ENSMUST00000191471/ENSMUSG00000073725, intron 14 of 15)	ENSMUSG00000073725	ENSMUST00000190195	Lmbrd1	LMBR1 domain containing 1	0910001K20Rik|AV347960
1_24760311_24760782	472	-	1_24760311_24760782	0	45	-8.24243	2.41201e-09	6.33597e-09	Down	Intron (ENSMUST00000191471/ENSMUSG00000073725, intron 14 of 15)	ENSMUSG00000073725	ENSMUST00000190195	Lmbrd1	LMBR1 domain containing 1	0910001K20Rik|AV347960
1_24762134_24762818	685	1_24762134_24762818	-	62	0	9.26531	9.20566e-18	1.93493e-16	Up	3' UTR	ENSMUSG00000073725	ENSMUST00000190195	Lmbrd1	LMBR1 domain containing 1	0910001K20Rik|AV347960
1_24764474_24764712	239	1_24764474_24764712	-	27	0	8.06903	1.24618e-08	2.79243e-08	Up	3' UTR	ENSMUSG00000073725	ENSMUST00000190195	Lmbrd1	LMBR1 domain containing 1	0910001K20Rik|AV347960
1_25308247_25308724	478	-	1_25308247_25308724	0	37	-7.96106	5.909e-08	1.17873e-07	Down	Intron (ENSMUST00000146592/ENSMUSG00000033569, intron 14 of 28)	ENSMUSG00000033569	ENSMUST00000192367	Adgrb3	adhesion G protein-coupled receptor B3	A830096D10Rik|Bai3
1_25313228_25313637	410	1_25313228_25313637	-	28	0	8.12131	7.04361e-09	1.66011e-08	Up	Intron (ENSMUST00000146592/ENSMUSG00000033569, intron 14 of 28)	ENSMUSG00000033569	ENSMUST00000193392	Adgrb3	adhesion G protein-coupled receptor B3	A830096D10Rik|Bai3
1_25364854_25365278	425	1_25364854_25365278	-	45	0	8.80385	1.49345e-13	1.11491e-12	Up	Exon (ENSMUST00000192216/ENSMUSG00000104100, exon 1 of 1)	ENSMUSG00000104100	ENSMUST00000192216	Gm37880	-	-
1_25367003_25367327	325	1_25367003_25367327	-	24	0	7.89978	7.04324e-08	1.37487e-07	Up	Promoter (1-2kb)	ENSMUSG00000104100	ENSMUST00000192216	Gm37880	-	-
1_25418705_25419392	688	1_25418705_25419392	-	56	0	9.11872	2.45896e-16	3.62401e-15	Up	Intron (ENSMUST00000146592/ENSMUSG00000033569, intron 15 of 28)	ENSMUSG00000033569	ENSMUST00000122791	Adgrb3	adhesion G protein-coupled receptor B3	A830096D10Rik|Bai3
1_25419756_25420167	412	-	1_25419756_25420167	0	36	-7.9217	1.01568e-07	1.94955e-07	Down	Intron (ENSMUST00000146592/ENSMUSG00000033569, intron 15 of 28)	ENSMUSG00000033569	ENSMUST00000122791	Adgrb3	adhesion G protein-coupled receptor B3	A830096D10Rik|Bai3
1_25461734_25462214	481	1_25461734_25462214	-	51	0	8.98404	4.49613e-15	4.86904e-14	Up	Intron (ENSMUST00000146592/ENSMUSG00000033569, intron 20 of 28)	ENSMUSG00000033569	ENSMUST00000122791	Adgrb3	adhesion G protein-coupled receptor B3	A830096D10Rik|Bai3
1_25462501_25463071	571	1_25462501_25463071	-	50	0	8.95553	7.35991e-15	7.54998e-14	Up	Intron (ENSMUST00000146592/ENSMUSG00000033569, intron 20 of 28)	ENSMUSG00000033569	ENSMUST00000122791	Adgrb3	adhesion G protein-coupled receptor B3	A830096D10Rik|Bai3
1_25757615_25758039	425	1_25757615_25758039	-	26	0	8.01479	2.21221e-08	4.74092e-08	Up	Exon (ENSMUST00000195723/ENSMUSG00000102659, exon 1 of 1)	ENSMUSG00000102659	ENSMUST00000195723	Gm37077	-	-
1_25898236_25898609	374	-	1_25898236_25898609	0	32	-7.75251	9.08175e-07	1.53104e-06	Down	Distal Intergenic	ENSMUSG00000104516	ENSMUST00000194343	Gm9884	-	-
1_26230073_26230525	453	-	1_26230073_26230525	0	47	-8.30497	8.46962e-10	2.41856e-09	Down	Distal Intergenic	ENSMUSG00000101618	ENSMUST00000185358	Gm18443	-	-
1_26388103_26388735	633	-	1_26388103_26388735	0	82	-9.10598	3.93677e-16	5.44693e-15	Down	Distal Intergenic	ENSMUSG00000099458	ENSMUST00000190716	Gm19123	-	-
1_26388895_26389842	948	-	1_26388895_26389842	0	84	-9.14068	2.50387e-16	3.62401e-15	Down	Distal Intergenic	ENSMUSG00000099458	ENSMUST00000190716	Gm19123	-	-
1_26907480_26909428	1949	1_26908776_26909299	1_26907480_26909428	37	151	-1.46349	7.8453e-06	1.21595e-05	Down	Distal Intergenic	ENSMUSG00000095256	ENSMUST00000179494	n-R5s209	-	-
1_27484902_27485439	538	-	1_27484902_27485439	0	47	-8.30497	8.46962e-10	2.41856e-09	Down	Distal Intergenic	ENSMUSG00000100310	ENSMUST00000188432	Gm19641	-	-
1_28870158_28870891	734	-	1_28870158_28870891	0	90	-9.24005	2.68427e-17	5.11637e-16	Down	Distal Intergenic	ENSMUSG00000058590	ENSMUST00000081488	Gm6462	-	-
1_28871138_28872316	1179	-	1_28871138_28872316	0	85	-9.15773	1.59569e-16	2.45583e-15	Down	Distal Intergenic	ENSMUSG00000058590	ENSMUST00000081488	Gm6462	-	-
1_28872387_28872688	302	1_28872387_28872688	-	29	0	8.17176	3.99443e-09	1.00658e-08	Up	Distal Intergenic	ENSMUSG00000058590	ENSMUST00000081488	Gm6462	-	-
1_30551927_30552262	336	-	1_30551927_30552262	0	32	-7.75251	9.08175e-07	1.53104e-06	Down	Distal Intergenic	ENSMUSG00000053185	ENSMUST00000065469	Gm9898	-	-
1_30553055_30553323	269	1_30553055_30553323	-	31	0	8.26765	7.42892e-10	2.14936e-09	Up	Distal Intergenic	ENSMUSG00000053185	ENSMUST00000065469	Gm9898	-	-
1_30803700_30803996	297	1_30803700_30803996	-	24	0	7.89978	7.04324e-08	1.37487e-07	Up	3' UTR	ENSMUSG00000048874	ENSMUST00000190190	Phf3	PHD finger protein 3	2310061N19Rik|mKIAA0244
1_30804352_30804662	311	-	1_30804352_30804662	0	24	-7.33971	2.47519e-06	4.01712e-06	Down	3' UTR	ENSMUSG00000048874	ENSMUST00000190190	Phf3	PHD finger protein 3	2310061N19Rik|mKIAA0244
1_30850775_30851119	345	1_30850775_30851119	-	31	0	8.26765	7.42892e-10	2.14936e-09	Up	Intron (ENSMUST00000186733/ENSMUSG00000048874, intron 14 of 15)	ENSMUSG00000048874	ENSMUST00000187600	Phf3	PHD finger protein 3	2310061N19Rik|mKIAA0244
1_30872635_30873091	457	-	1_30872635_30873091	0	37	-7.96106	5.909e-08	1.17873e-07	Down	5' UTR	ENSMUSG00000048874	ENSMUST00000187968	Phf3	PHD finger protein 3	2310061N19Rik|mKIAA0244
1_30949738_30951494	1757	1_30949821_30950169;1_30950353_30950962	1_30949738_30951494	144	493	-1.21199	8.86037e-07	1.53104e-06	Down	Promoter (<=1kb)	ENSMUSG00000026064	ENSMUST00000027232	Ptp4a1	protein tyrosine phosphatase 4a1	AA415290|AU019864|C130021B01|Prl-1
1_31678967_31679623	657	-	1_31678967_31679623	0	40	-8.0731	2.01468e-08	4.43681e-08	Down	Distal Intergenic	ENSMUSG00000088620	ENSMUST00000157995	Gm23032	-	-
1_32200790_32201055	266	1_32200790_32201055	-	28	0	8.12131	7.04361e-09	1.66011e-08	Up	Intron (ENSMUST00000027226/ENSMUSG00000026058, intron 1 of 8)	ENSMUSG00000026058	ENSMUST00000082754	Khdrbs2	KH domain containing, RNA binding, signal transduction associated 2	6330586C16Rik|Slim1|Slm-1|Slm1|mSLM-1
1_32833800_32834856	1057	-	1_32833800_32834856	0	73	-8.93858	1.5826e-14	1.51779e-13	Down	Distal Intergenic	ENSMUSG00000089395	ENSMUST00000158770	Gm23024	-	-
1_33275101_33275602	502	-	1_33275101_33275602	0	42	-8.14324	6.93678e-09	1.66011e-08	Down	Distal Intergenic	ENSMUSG00000065223	ENSMUST00000083289	Gm25792	-	-
1_33281646_33282178	533	1_33281646_33282178	-	56	0	9.11872	2.45896e-16	3.62401e-15	Up	Distal Intergenic	ENSMUSG00000065223	ENSMUST00000083289	Gm25792	-	-
1_33288607_33288885	279	1_33288607_33288885	-	31	0	8.26765	7.42892e-10	2.14936e-09	Up	Distal Intergenic	ENSMUSG00000065223	ENSMUST00000083289	Gm25792	-	-
1_33291336_33291574	239	1_33291336_33291574	-	22	0	7.7748	4.1078e-07	7.32295e-07	Up	Distal Intergenic	ENSMUSG00000065223	ENSMUST00000083289	Gm25792	-	-
1_33483522_33483766	245	1_33483522_33483766	-	22	0	7.7748	4.1078e-07	7.32295e-07	Up	Intron (ENSMUST00000027312/ENSMUSG00000026134, intron 3 of 13)	ENSMUSG00000026134	ENSMUST00000185489	Prim2	DNA primase, p58 subunit	AI323589
1_33555734_33556054	321	1_33555734_33556054	-	24	0	7.89978	7.04324e-08	1.37487e-07	Up	Intron (ENSMUST00000027312/ENSMUSG00000026134, intron 7 of 13)	ENSMUSG00000026134	ENSMUST00000192891	Prim2	DNA primase, p58 subunit	AI323589
1_33577426_33579709	2284	1_33577445_33579709	1_33577426_33578053;1_33578421_33578874	228	94	1.83961	1.27458e-11	5.81262e-11	Up	Intron (ENSMUST00000027312/ENSMUSG00000026134, intron 7 of 13)	ENSMUSG00000026134	ENSMUST00000192891	Prim2	DNA primase, p58 subunit	AI323589
1_33579979_33580386	408	1_33579979_33580386	-	31	0	8.26765	7.42892e-10	2.14936e-09	Up	Intron (ENSMUST00000027312/ENSMUSG00000026134, intron 7 of 13)	ENSMUSG00000026134	ENSMUST00000192891	Prim2	DNA primase, p58 subunit	AI323589
1_33586874_33587112	239	1_33586874_33587112	-	21	0	7.708	4.1078e-07	7.32295e-07	Up	Intron (ENSMUST00000027312/ENSMUSG00000026134, intron 7 of 13)	ENSMUSG00000026134	ENSMUST00000192891	Prim2	DNA primase, p58 subunit	AI323589
1_33604442_33604792	351	1_33604442_33604792	-	33	0	8.35756	2.45934e-10	8.02848e-10	Up	Intron (ENSMUST00000027312/ENSMUSG00000026134, intron 7 of 13)	ENSMUSG00000026134	ENSMUST00000192891	Prim2	DNA primase, p58 subunit	AI323589
1_33617518_33617836	319	1_33617518_33617836	-	37	0	8.52215	1.63617e-11	7.0045e-11	Up	Promoter (1-2kb)	ENSMUSG00000102714	ENSMUST00000192891	Gm37618	-	-
1_33618217_33618559	343	1_33618217_33618559	-	28	0	8.12131	7.04361e-09	1.66011e-08	Up	Promoter (1-2kb)	ENSMUSG00000102714	ENSMUST00000192891	Gm37618	-	-
1_33642891_33643607	717	1_33642891_33643607	-	62	0	9.26531	9.20566e-18	1.93493e-16	Up	Intron (ENSMUST00000027312/ENSMUSG00000026134, intron 9 of 13)	ENSMUSG00000026134	ENSMUST00000185377	Prim2	DNA primase, p58 subunit	AI323589
1_33645773_33646088	316	1_33645773_33646088	-	50	0	8.95553	7.35991e-15	7.54998e-14	Up	Intron (ENSMUST00000027312/ENSMUSG00000026134, intron 9 of 13)	ENSMUSG00000026134	ENSMUST00000185377	Prim2	DNA primase, p58 subunit	AI323589
1_33647026_33647264	239	1_33647026_33647264	-	25	0	7.95843	3.94049e-08	8.10452e-08	Up	Intron (ENSMUST00000027312/ENSMUSG00000026134, intron 9 of 13)	ENSMUSG00000026134	ENSMUST00000185377	Prim2	DNA primase, p58 subunit	AI323589
1_33719785_33720169	385	-	1_33719785_33720169	0	50	-8.39396	1.79489e-10	6.15694e-10	Down	Promoter (<=1kb)	ENSMUSG00000004768	ENSMUST00000195006	Rab23	RAB23, member RAS oncogene family	AW545388|opb|opb2
1_33757246_33758047	802	-	1_33757246_33758047	0	70	-8.87816	4.06981e-14	3.58689e-13	Down	Promoter (<=1kb)	ENSMUSG00000042215	ENSMUST00000044691	Bag2	BCL2-associated athanogene 2	2610042A13Rik|BC016230
1_33768281_33768545	265	1_33768281_33768545	-	38	0	8.56052	9.60067e-12	4.38615e-11	Up	Intron (ENSMUST00000139143/ENSMUSG00000042197, intron 2 of 12)	ENSMUSG00000042197	ENSMUST00000044691	Zfp451	zinc finger protein 451	4930515K21Rik|4933435G09Rik|AI596398|COASTER|Kiaa0576-hp|Znf451|mKIAA1702
1_33779901_33780246	346	1_33779980_33780246	1_33779901_33780211	25	18	1.0308	0.0387935	0.0481319	Up	3' UTR	ENSMUSG00000042197	ENSMUST00000151055	Zfp451	zinc finger protein 451	4930515K21Rik|4933435G09Rik|AI596398|COASTER|Kiaa0576-hp|Znf451|mKIAA1702
1_33812210_33815142	2933	1_33812927_33813442;1_33813734_33814328	1_33812210_33815142	131	525	-1.43909	7.38316e-09	1.73967e-08	Down	Promoter (<=1kb)	ENSMUSG00000042197	ENSMUST00000139143	Zfp451	zinc finger protein 451	4930515K21Rik|4933435G09Rik|AI596398|COASTER|Kiaa0576-hp|Znf451|mKIAA1702
1_33861140_33862030	891	-	1_33861140_33862030	0	118	-9.63027	1.9571e-20	7.66991e-19	Down	Intron (ENSMUST00000115161/ENSMUSG00000042182, intron 1 of 5)	ENSMUSG00000042182	ENSMUST00000195350	Bend6	BEN domain containing 6	B230209C24Rik
1_33862779_33863127	349	1_33862779_33863127	-	40	0	8.63433	3.33429e-12	1.75371e-11	Up	Intron (ENSMUST00000115161/ENSMUSG00000042182, intron 2 of 5)	ENSMUSG00000042182	ENSMUST00000195350	Bend6	BEN domain containing 6	B230209C24Rik
1_33865004_33865468	465	1_33865004_33865468	-	48	0	8.89676	3.27725e-14	2.96107e-13	Up	Intron (ENSMUST00000115161/ENSMUSG00000042182, intron 4 of 5)	ENSMUSG00000042182	ENSMUST00000195350	Bend6	BEN domain containing 6	B230209C24Rik
1_33927733_33928242	510	1_33927733_33928242	-	41	0	8.66986	1.97336e-12	1.10472e-11	Up	Intron (ENSMUST00000183034/ENSMUSG00000026131, intron 2 of 102)	ENSMUSG00000026131	ENSMUST00000193333	Dst	dystonin	2310001O04Rik|A830042E19Rik|AW554249|BP230|BPAG1-n|Bpag|Bpag1|Macf2|ah|athetoid|dt|mKIAA0728|nmf203|nmf339
1_33937160_33937990	831	1_33937160_33937990	-	79	0	9.61439	1.35626e-21	6.88308e-20	Up	Intron (ENSMUST00000183034/ENSMUSG00000026131, intron 2 of 102)	ENSMUSG00000026131	ENSMUST00000193333	Dst	dystonin	2310001O04Rik|A830042E19Rik|AW554249|BP230|BPAG1-n|Bpag|Bpag1|Macf2|ah|athetoid|dt|mKIAA0728|nmf203|nmf339
1_33939200_33939650	451	1_33939200_33939650	-	43	0	8.73841	4.15962e-13	2.73662e-12	Up	Intron (ENSMUST00000183034/ENSMUSG00000026131, intron 2 of 102)	ENSMUSG00000026131	ENSMUST00000193333	Dst	dystonin	2310001O04Rik|A830042E19Rik|AW554249|BP230|BPAG1-n|Bpag|Bpag1|Macf2|ah|athetoid|dt|mKIAA0728|nmf203|nmf339
1_33939938_33940347	410	-	1_33939938_33940347	0	37	-7.96106	5.909e-08	1.17873e-07	Down	Intron (ENSMUST00000183034/ENSMUSG00000026131, intron 2 of 102)	ENSMUSG00000026131	ENSMUST00000193333	Dst	dystonin	2310001O04Rik|A830042E19Rik|AW554249|BP230|BPAG1-n|Bpag|Bpag1|Macf2|ah|athetoid|dt|mKIAA0728|nmf203|nmf339
1_33940475_33941164	690	1_33940475_33941164	-	52	0	9.012	2.75344e-15	3.17747e-14	Up	Intron (ENSMUST00000183034/ENSMUSG00000026131, intron 2 of 102)	ENSMUSG00000026131	ENSMUST00000193333	Dst	dystonin	2310001O04Rik|A830042E19Rik|AW554249|BP230|BPAG1-n|Bpag|Bpag1|Macf2|ah|athetoid|dt|mKIAA0728|nmf203|nmf339
1_33945528_33945836	309	1_33945528_33945836	-	30	0	8.2205	1.29729e-09	3.54454e-09	Up	Intron (ENSMUST00000183034/ENSMUSG00000026131, intron 2 of 102)	ENSMUSG00000026131	ENSMUST00000190740	Dst	dystonin	2310001O04Rik|A830042E19Rik|AW554249|BP230|BPAG1-n|Bpag|Bpag1|Macf2|ah|athetoid|dt|mKIAA0728|nmf203|nmf339
1_34003128_34003576	449	-	1_34003128_34003576	0	34	-7.83958	3.02271e-07	5.50653e-07	Down	Intron (ENSMUST00000183034/ENSMUSG00000026131, intron 3 of 102)	ENSMUSG00000026131	ENSMUST00000187486	Dst	dystonin	2310001O04Rik|A830042E19Rik|AW554249|BP230|BPAG1-n|Bpag|Bpag1|Macf2|ah|athetoid|dt|mKIAA0728|nmf203|nmf339
1_34009517_34009827	311	-	1_34009517_34009827	0	37	-7.96106	5.909e-08	1.17873e-07	Down	Promoter (1-2kb)	ENSMUSG00000026131	ENSMUST00000097786	Dst	dystonin	2310001O04Rik|A830042E19Rik|AW554249|BP230|BPAG1-n|Bpag|Bpag1|Macf2|ah|athetoid|dt|mKIAA0728|nmf203|nmf339
1_34021753_34022344	592	1_34021753_34022344	-	43	0	8.73841	4.15962e-13	2.73662e-12	Up	Intron (ENSMUST00000183034/ENSMUSG00000026131, intron 4 of 102)	ENSMUSG00000026131	ENSMUST00000194178	Dst	dystonin	2310001O04Rik|A830042E19Rik|AW554249|BP230|BPAG1-n|Bpag|Bpag1|Macf2|ah|athetoid|dt|mKIAA0728|nmf203|nmf339
1_34023447_34023912	466	-	1_34023447_34023912	0	33	-7.79671	5.23325e-07	9.17763e-07	Down	Intron (ENSMUST00000183034/ENSMUSG00000026131, intron 4 of 102)	ENSMUSG00000026131	ENSMUST00000194178	Dst	dystonin	2310001O04Rik|A830042E19Rik|AW554249|BP230|BPAG1-n|Bpag|Bpag1|Macf2|ah|athetoid|dt|mKIAA0728|nmf203|nmf339
1_34034755_34035195	441	1_34034755_34035195	-	36	0	8.48273	4.79413e-11	1.90587e-10	Up	Intron (ENSMUST00000183034/ENSMUSG00000026131, intron 4 of 102)	ENSMUSG00000026131	ENSMUST00000194178	Dst	dystonin	2310001O04Rik|A830042E19Rik|AW554249|BP230|BPAG1-n|Bpag|Bpag1|Macf2|ah|athetoid|dt|mKIAA0728|nmf203|nmf339
1_34040540_34040899	360	-	1_34040540_34040899	0	36	-7.9217	1.01568e-07	1.94955e-07	Down	Intron (ENSMUST00000183034/ENSMUSG00000026131, intron 4 of 102)	ENSMUSG00000026131	ENSMUST00000194178	Dst	dystonin	2310001O04Rik|A830042E19Rik|AW554249|BP230|BPAG1-n|Bpag|Bpag1|Macf2|ah|athetoid|dt|mKIAA0728|nmf203|nmf339
1_34041058_34041731	674	1_34041213_34041731	1_34041058_34041436	36	23	1.20404	0.00631844	0.00833549	Up	Intron (ENSMUST00000183034/ENSMUSG00000026131, intron 4 of 102)	ENSMUSG00000026131	ENSMUST00000194178	Dst	dystonin	2310001O04Rik|A830042E19Rik|AW554249|BP230|BPAG1-n|Bpag|Bpag1|Macf2|ah|athetoid|dt|mKIAA0728|nmf203|nmf339
1_34043869_34044424	556	1_34043869_34044424	-	72	0	9.48071	4.20784e-20	1.51936e-18	Up	Intron (ENSMUST00000183034/ENSMUSG00000026131, intron 4 of 102)	ENSMUSG00000026131	ENSMUST00000194178	Dst	dystonin	2310001O04Rik|A830042E19Rik|AW554249|BP230|BPAG1-n|Bpag|Bpag1|Macf2|ah|athetoid|dt|mKIAA0728|nmf203|nmf339
1_34062001_34065105	3105	1_34062001_34063202;1_34063400_34065105	1_34062071_34062642;1_34063115_34064078;1_34064273_34064980	314	215	1.10885	5.21097e-06	8.11492e-06	Up	Intron (ENSMUST00000183034/ENSMUSG00000026131, intron 4 of 102)	ENSMUSG00000026131	ENSMUST00000182410	Dst	dystonin	2310001O04Rik|A830042E19Rik|AW554249|BP230|BPAG1-n|Bpag|Bpag1|Macf2|ah|athetoid|dt|mKIAA0728|nmf203|nmf339
1_34065957_34066615	659	-	1_34065957_34066615	0	61	-8.68007	1.9438e-12	1.10472e-11	Down	Intron (ENSMUST00000183034/ENSMUSG00000026131, intron 4 of 102)	ENSMUSG00000026131	ENSMUST00000182410	Dst	dystonin	2310001O04Rik|A830042E19Rik|AW554249|BP230|BPAG1-n|Bpag|Bpag1|Macf2|ah|athetoid|dt|mKIAA0728|nmf203|nmf339
1_34067369_34068000	632	1_34067369_34068000	-	60	0	9.21808	3.71245e-17	6.70091e-16	Up	Intron (ENSMUST00000183034/ENSMUSG00000026131, intron 4 of 102)	ENSMUSG00000026131	ENSMUST00000182410	Dst	dystonin	2310001O04Rik|A830042E19Rik|AW554249|BP230|BPAG1-n|Bpag|Bpag1|Macf2|ah|athetoid|dt|mKIAA0728|nmf203|nmf339
1_34068713_34069503	791	-	1_34068713_34069503	0	78	-9.03397	2.455e-15	2.95618e-14	Down	Intron (ENSMUST00000183034/ENSMUSG00000026131, intron 4 of 102)	ENSMUSG00000026131	ENSMUST00000182410	Dst	dystonin	2310001O04Rik|A830042E19Rik|AW554249|BP230|BPAG1-n|Bpag|Bpag1|Macf2|ah|athetoid|dt|mKIAA0728|nmf203|nmf339
1_34069639_34071449	1811	1_34069639_34071136	1_34070109_34071449	197	135	1.10734	2.37414e-05	3.51992e-05	Up	Intron (ENSMUST00000183034/ENSMUSG00000026131, intron 4 of 102)	ENSMUSG00000026131	ENSMUST00000182410	Dst	dystonin	2310001O04Rik|A830042E19Rik|AW554249|BP230|BPAG1-n|Bpag|Bpag1|Macf2|ah|athetoid|dt|mKIAA0728|nmf203|nmf339
1_34085938_34086325	388	-	1_34085938_34086325	0	27	-7.50864	8.426e-06	1.282e-05	Down	Exon (ENSMUST00000183034/ENSMUSG00000026131, exon 5 of 103)	ENSMUSG00000026131	ENSMUST00000182410	Dst	dystonin	2310001O04Rik|A830042E19Rik|AW554249|BP230|BPAG1-n|Bpag|Bpag1|Macf2|ah|athetoid|dt|mKIAA0728|nmf203|nmf339
1_34088467_34088830	364	-	1_34088467_34088830	0	27	-7.50864	8.426e-06	1.282e-05	Down	Promoter (<=1kb)	ENSMUSG00000026131	ENSMUST00000182410	Dst	dystonin	2310001O04Rik|A830042E19Rik|AW554249|BP230|BPAG1-n|Bpag|Bpag1|Macf2|ah|athetoid|dt|mKIAA0728|nmf203|nmf339
1_34091258_34091728	471	1_34091258_34091728	-	43	0	8.73841	4.15962e-13	2.73662e-12	Up	Intron (ENSMUST00000183034/ENSMUSG00000026131, intron 5 of 102)	ENSMUSG00000026131	ENSMUST00000182410	Dst	dystonin	2310001O04Rik|A830042E19Rik|AW554249|BP230|BPAG1-n|Bpag|Bpag1|Macf2|ah|athetoid|dt|mKIAA0728|nmf203|nmf339
1_34092081_34092489	409	-	1_34092081_34092489	0	35	-7.88122	1.75007e-07	3.29918e-07	Down	Intron (ENSMUST00000183034/ENSMUSG00000026131, intron 5 of 102)	ENSMUSG00000026131	ENSMUST00000182410	Dst	dystonin	2310001O04Rik|A830042E19Rik|AW554249|BP230|BPAG1-n|Bpag|Bpag1|Macf2|ah|athetoid|dt|mKIAA0728|nmf203|nmf339
1_34094570_34095780	1211	1_34094570_34095780	-	126	0	10.2872	1.20269e-30	3.45359e-28	Up	Intron (ENSMUST00000183034/ENSMUSG00000026131, intron 5 of 102)	ENSMUSG00000026131	ENSMUST00000182410	Dst	dystonin	2310001O04Rik|A830042E19Rik|AW554249|BP230|BPAG1-n|Bpag|Bpag1|Macf2|ah|athetoid|dt|mKIAA0728|nmf203|nmf339
1_34096046_34096553	508	1_34096046_34096553	-	56	0	9.11872	2.45896e-16	3.62401e-15	Up	Intron (ENSMUST00000183034/ENSMUSG00000026131, intron 5 of 102)	ENSMUSG00000026131	ENSMUST00000182410	Dst	dystonin	2310001O04Rik|A830042E19Rik|AW554249|BP230|BPAG1-n|Bpag|Bpag1|Macf2|ah|athetoid|dt|mKIAA0728|nmf203|nmf339
1_34108509_34108942	434	-	1_34108509_34108942	0	32	-7.75251	9.08175e-07	1.53104e-06	Down	Intron (ENSMUST00000183034/ENSMUSG00000026131, intron 5 of 102)	ENSMUSG00000026131	ENSMUST00000198033	Dst	dystonin	2310001O04Rik|A830042E19Rik|AW554249|BP230|BPAG1-n|Bpag|Bpag1|Macf2|ah|athetoid|dt|mKIAA0728|nmf203|nmf339
1_34109327_34110009	683	-	1_34109327_34110009	0	66	-8.79346	2.7628e-13	1.91851e-12	Down	Intron (ENSMUST00000183034/ENSMUSG00000026131, intron 5 of 102)	ENSMUSG00000026131	ENSMUST00000198033	Dst	dystonin	2310001O04Rik|A830042E19Rik|AW554249|BP230|BPAG1-n|Bpag|Bpag1|Macf2|ah|athetoid|dt|mKIAA0728|nmf203|nmf339
1_34110529_34111501	973	1_34110529_34111501	-	66	0	9.35536	9.40652e-19	2.53261e-17	Up	Intron (ENSMUST00000183034/ENSMUSG00000026131, intron 5 of 102)	ENSMUSG00000026131	ENSMUST00000198033	Dst	dystonin	2310001O04Rik|A830042E19Rik|AW554249|BP230|BPAG1-n|Bpag|Bpag1|Macf2|ah|athetoid|dt|mKIAA0728|nmf203|nmf339
1_34111909_34112273	365	1_34111909_34112273	-	42	0	8.70454	1.17118e-12	7.07889e-12	Up	Intron (ENSMUST00000183034/ENSMUSG00000026131, intron 5 of 102)	ENSMUSG00000026131	ENSMUST00000198033	Dst	dystonin	2310001O04Rik|A830042E19Rik|AW554249|BP230|BPAG1-n|Bpag|Bpag1|Macf2|ah|athetoid|dt|mKIAA0728|nmf203|nmf339
1_34112955_34113342	388	-	1_34112955_34113342	0	26	-7.4545	1.47851e-05	2.21227e-05	Down	Intron (ENSMUST00000183034/ENSMUSG00000026131, intron 5 of 102)	ENSMUSG00000026131	ENSMUST00000198033	Dst	dystonin	2310001O04Rik|A830042E19Rik|AW554249|BP230|BPAG1-n|Bpag|Bpag1|Macf2|ah|athetoid|dt|mKIAA0728|nmf203|nmf339
1_34113846_34114173	328	-	1_34113846_34114173	0	23	-7.27869	4.53786e-06	7.16963e-06	Down	Exon (ENSMUST00000183034/ENSMUSG00000026131, exon 6 of 103)	ENSMUSG00000026131	ENSMUST00000198033	Dst	dystonin	2310001O04Rik|A830042E19Rik|AW554249|BP230|BPAG1-n|Bpag|Bpag1|Macf2|ah|athetoid|dt|mKIAA0728|nmf203|nmf339
1_34115169_34115803	635	-	1_34115169_34115803	0	41	-8.1086	1.18072e-08	2.73413e-08	Down	Promoter (1-2kb)	ENSMUSG00000105982	ENSMUST00000198033	Mir6896	microRNA 6896	mmu-mir-6896
1_34115940_34116230	291	1_34115940_34116230	-	32	0	8.31331	4.26767e-10	1.30949e-09	Up	Promoter (1-2kb)	ENSMUSG00000105982	ENSMUST00000198033	Mir6896	microRNA 6896	mmu-mir-6896
1_34118090_34118904	815	1_34118166_34118904	1_34118090_34118717	99	65	1.16811	0.000185176	0.000263524	Up	Exon (ENSMUST00000182410/ENSMUSG00000026131, exon 4 of 4)	ENSMUSG00000026131	ENSMUST00000198033	Dst	dystonin	2310001O04Rik|A830042E19Rik|AW554249|BP230|BPAG1-n|Bpag|Bpag1|Macf2|ah|athetoid|dt|mKIAA0728|nmf203|nmf339
1_34123594_34124295	702	1_34123637_34124166	1_34123594_34124295	54	39	1.02963	0.00621651	0.0082061	Up	Intron (ENSMUST00000183034/ENSMUSG00000026131, intron 8 of 102)	ENSMUSG00000026131	ENSMUST00000183006	Dst	dystonin	2310001O04Rik|A830042E19Rik|AW554249|BP230|BPAG1-n|Bpag|Bpag1|Macf2|ah|athetoid|dt|mKIAA0728|nmf203|nmf339
1_34134714_34135097	384	1_34134714_34135097	-	42	0	8.70454	1.17118e-12	7.07889e-12	Up	Exon (ENSMUST00000183034/ENSMUSG00000026131, exon 9 of 103)	ENSMUSG00000026131	ENSMUST00000183006	Dst	dystonin	2310001O04Rik|A830042E19Rik|AW554249|BP230|BPAG1-n|Bpag|Bpag1|Macf2|ah|athetoid|dt|mKIAA0728|nmf203|nmf339
1_34137459_34138263	805	1_34137489_34138263	1_34137459_34138043	91	56	1.26116	0.000115286	0.000165189	Up	Intron (ENSMUST00000183034/ENSMUSG00000026131, intron 9 of 102)	ENSMUSG00000026131	ENSMUST00000183006	Dst	dystonin	2310001O04Rik|A830042E19Rik|AW554249|BP230|BPAG1-n|Bpag|Bpag1|Macf2|ah|athetoid|dt|mKIAA0728|nmf203|nmf339
1_34139299_34140997	1699	1_34139299_34140997	1_34140193_34140726	178	39	2.7486	1.81219e-18	4.76539e-17	Up	Intron (ENSMUST00000183034/ENSMUSG00000026131, intron 9 of 102)	ENSMUSG00000026131	ENSMUST00000183006	Dst	dystonin	2310001O04Rik|A830042E19Rik|AW554249|BP230|BPAG1-n|Bpag|Bpag1|Macf2|ah|athetoid|dt|mKIAA0728|nmf203|nmf339
1_34142054_34142364	311	-	1_34142054_34142364	0	39	-8.03672	3.4461e-08	7.26383e-08	Down	Intron (ENSMUST00000183034/ENSMUSG00000026131, intron 9 of 102)	ENSMUSG00000026131	ENSMUST00000183302	Dst	dystonin	2310001O04Rik|A830042E19Rik|AW554249|BP230|BPAG1-n|Bpag|Bpag1|Macf2|ah|athetoid|dt|mKIAA0728|nmf203|nmf339
1_34142893_34143172	280	1_34142893_34143172	-	30	0	8.2205	1.29729e-09	3.54454e-09	Up	Intron (ENSMUST00000183034/ENSMUSG00000026131, intron 9 of 102)	ENSMUSG00000026131	ENSMUST00000183302	Dst	dystonin	2310001O04Rik|A830042E19Rik|AW554249|BP230|BPAG1-n|Bpag|Bpag1|Macf2|ah|athetoid|dt|mKIAA0728|nmf203|nmf339
1_34154114_34154780	667	-	1_34154114_34154780	0	60	-8.65628	3.18385e-12	1.75371e-11	Down	Exon (ENSMUST00000183034/ENSMUSG00000026131, exon 12 of 103)	ENSMUSG00000026131	ENSMUST00000183302	Dst	dystonin	2310001O04Rik|A830042E19Rik|AW554249|BP230|BPAG1-n|Bpag|Bpag1|Macf2|ah|athetoid|dt|mKIAA0728|nmf203|nmf339
1_34158015_34158366	352	1_34158015_34158366	-	35	0	8.4422	8.24314e-11	3.08621e-10	Up	Promoter (1-2kb)	ENSMUSG00000026131	ENSMUST00000183302	Dst	dystonin	2310001O04Rik|A830042E19Rik|AW554249|BP230|BPAG1-n|Bpag|Bpag1|Macf2|ah|athetoid|dt|mKIAA0728|nmf203|nmf339
1_34158700_34159213	514	1_34158700_34159213	-	46	0	8.83549	8.98453e-14	7.11197e-13	Up	Promoter (1-2kb)	ENSMUSG00000026131	ENSMUST00000183302	Dst	dystonin	2310001O04Rik|A830042E19Rik|AW554249|BP230|BPAG1-n|Bpag|Bpag1|Macf2|ah|athetoid|dt|mKIAA0728|nmf203|nmf339
1_34171945_34172322	378	1_34171945_34172322	-	29	0	8.17176	3.99443e-09	1.00658e-08	Up	Exon (ENSMUST00000183034/ENSMUSG00000026131, exon 32 of 103)	ENSMUSG00000026131	ENSMUST00000181692	Dst	dystonin	2310001O04Rik|A830042E19Rik|AW554249|BP230|BPAG1-n|Bpag|Bpag1|Macf2|ah|athetoid|dt|mKIAA0728|nmf203|nmf339
1_34173724_34174079	356	-	1_34173724_34174079	0	28	-7.56082	4.812e-06	7.49864e-06	Down	Intron (ENSMUST00000183034/ENSMUSG00000026131, intron 33 of 102)	ENSMUSG00000026131	ENSMUST00000181692	Dst	dystonin	2310001O04Rik|A830042E19Rik|AW554249|BP230|BPAG1-n|Bpag|Bpag1|Macf2|ah|athetoid|dt|mKIAA0728|nmf203|nmf339
1_34175664_34175942	279	1_34175664_34175942	-	24	0	7.89978	7.04324e-08	1.37487e-07	Up	Exon (ENSMUST00000187268/ENSMUSG00000096992, exon 1 of 1)	ENSMUSG00000096992	ENSMUST00000181692	Gm26788	-	-
1_34177513_34177841	329	-	1_34177513_34177841	0	27	-7.50864	8.426e-06	1.282e-05	Down	Exon (ENSMUST00000183302/ENSMUSG00000026131, exon 23 of 24)	ENSMUSG00000026131	ENSMUST00000181692	Dst	dystonin	2310001O04Rik|A830042E19Rik|AW554249|BP230|BPAG1-n|Bpag|Bpag1|Macf2|ah|athetoid|dt|mKIAA0728|nmf203|nmf339
1_34182386_34183006	621	1_34182386_34183006	-	43	0	8.73841	4.15962e-13	2.73662e-12	Up	Exon (ENSMUST00000183302/ENSMUSG00000026131, exon 24 of 24)	ENSMUSG00000026131	ENSMUST00000189952	Dst	dystonin	2310001O04Rik|A830042E19Rik|AW554249|BP230|BPAG1-n|Bpag|Bpag1|Macf2|ah|athetoid|dt|mKIAA0728|nmf203|nmf339
1_34183597_34183997	401	1_34183597_34183997	-	37	0	8.52215	1.63617e-11	7.0045e-11	Up	3' UTR	ENSMUSG00000026131	ENSMUST00000189952	Dst	dystonin	2310001O04Rik|A830042E19Rik|AW554249|BP230|BPAG1-n|Bpag|Bpag1|Macf2|ah|athetoid|dt|mKIAA0728|nmf203|nmf339
1_34188110_34188424	315	-	1_34188110_34188424	0	20	-7.07845	2.86152e-05	4.18444e-05	Down	Exon (ENSMUST00000183034/ENSMUSG00000026131, exon 39 of 103)	ENSMUSG00000026131	ENSMUST00000189952	Dst	dystonin	2310001O04Rik|A830042E19Rik|AW554249|BP230|BPAG1-n|Bpag|Bpag1|Macf2|ah|athetoid|dt|mKIAA0728|nmf203|nmf339
1_34189572_34190036	465	1_34189572_34190036	-	48	0	8.89676	3.27725e-14	2.96107e-13	Up	Exon (ENSMUST00000183034/ENSMUSG00000026131, exon 39 of 103)	ENSMUSG00000026131	ENSMUST00000189952	Dst	dystonin	2310001O04Rik|A830042E19Rik|AW554249|BP230|BPAG1-n|Bpag|Bpag1|Macf2|ah|athetoid|dt|mKIAA0728|nmf203|nmf339
1_34210347_34210783	437	1_34210347_34210783	-	41	0	8.66986	1.97336e-12	1.10472e-11	Up	Intron (ENSMUST00000183034/ENSMUSG00000026131, intron 49 of 102)	ENSMUSG00000026131	ENSMUST00000194192	Dst	dystonin	2310001O04Rik|A830042E19Rik|AW554249|BP230|BPAG1-n|Bpag|Bpag1|Macf2|ah|athetoid|dt|mKIAA0728|nmf203|nmf339
1_34258596_34258924	329	-	1_34258596_34258924	0	27	-7.50864	8.426e-06	1.282e-05	Down	Intron (ENSMUST00000183034/ENSMUSG00000026131, intron 71 of 102)	ENSMUSG00000026131	ENSMUST00000182018	Dst	dystonin	2310001O04Rik|A830042E19Rik|AW554249|BP230|BPAG1-n|Bpag|Bpag1|Macf2|ah|athetoid|dt|mKIAA0728|nmf203|nmf339
1_34367885_34368210	326	1_34367885_34368210	-	48	0	8.89676	3.27725e-14	2.96107e-13	Up	Intron (ENSMUST00000187302/ENSMUSG00000101206, intron 1 of 1)	ENSMUSG00000101206	ENSMUST00000187302	Gm5266	-	-
1_34395288_34395613	326	-	1_34395288_34395613	0	32	-7.75251	9.08175e-07	1.53104e-06	Down	Distal Intergenic	ENSMUSG00000101462	ENSMUST00000186409	Gm3052	-	-
1_34396118_34396401	284	1_34396118_34396401	-	25	0	7.95843	3.94049e-08	8.10452e-08	Up	Distal Intergenic	ENSMUSG00000101462	ENSMUST00000186409	Gm3052	-	-
1_34435842_34436193	352	1_34435842_34436193	-	40	0	8.63433	3.33429e-12	1.75371e-11	Up	Downstream (<1kb)	ENSMUSG00000042111	ENSMUST00000188583	Ccdc115	coiled-coil domain containing 115	2310061I09Rik|Ccp1
1_34439360_34440602	1243	1_34439907_34440465	1_34439360_34440602	80	384	-1.69882	2.48475e-10	8.11111e-10	Down	Promoter (<=1kb)	ENSMUSG00000026127	ENSMUST00000027303	Imp4	IMP4, U3 small nucleolar ribonucleoprotein	AA409888|AV031295|D1Wsu40e
1_34468243_34469924	1682	-	1_34468243_34469924	0	174	-10.19	8.15068e-28	1.39016e-25	Down	Exon (ENSMUST00000027302/ENSMUSG00000026126, exon 6 of 15)	ENSMUSG00000026126	ENSMUST00000191357	Ptpn18	protein tyrosine phosphatase, non-receptor type 18	FLP1|HSCF|PTP-HSCF|PTP-K1|Ptpk1
1_34803042_34803596	555	1_34803042_34803596	-	54	0	9.06635	1.04021e-15	1.33762e-14	Up	Intron (ENSMUST00000159747/ENSMUSG00000037509, intron 5 of 13)	ENSMUSG00000037509	ENSMUST00000160855	Arhgef4	Rho guanine nucleotide exchange factor (GEF) 4	9330140K16Rik|Asef
1_34820358_34820664	307	1_34820358_34820664	-	30	0	8.2205	1.29729e-09	3.54454e-09	Up	Intron (ENSMUST00000167518/ENSMUSG00000037503, intron 4 of 7)	ENSMUSG00000037503	ENSMUST00000192924	Fam168b	family with sequence similarity 168, member B	Mani|mKIAA4042
1_34824380_34824725	346	-	1_34824380_34824725	0	29	-7.61119	2.75402e-06	4.40215e-06	Down	Exon (ENSMUST00000192924/ENSMUSG00000104358, exon 1 of 1)	ENSMUSG00000104358	ENSMUST00000192924	Gm37127	-	-
1_34826809_34827052	244	1_34826809_34827052	-	25	0	7.95843	3.94049e-08	8.10452e-08	Up	Intron (ENSMUST00000167518/ENSMUSG00000037503, intron 5 of 7)	ENSMUSG00000037503	ENSMUST00000192924	Fam168b	family with sequence similarity 168, member B	Mani|mKIAA4042
1_34829569_34829853	285	1_34829569_34829853	-	41	0	8.66986	1.97336e-12	1.10472e-11	Up	Intron (ENSMUST00000167518/ENSMUSG00000037503, intron 6 of 7)	ENSMUSG00000037503	ENSMUST00000192924	Fam168b	family with sequence similarity 168, member B	Mani|mKIAA4042
1_34832474_34832802	329	1_34832474_34832802	-	40	0	8.63433	3.33429e-12	1.75371e-11	Up	Intron (ENSMUST00000167518/ENSMUSG00000037503, intron 6 of 7)	ENSMUSG00000037503	ENSMUST00000192924	Fam168b	family with sequence similarity 168, member B	Mani|mKIAA4042
1_34833348_34833762	415	1_34833348_34833762	-	44	0	8.7715	2.48909e-13	1.74548e-12	Up	Intron (ENSMUST00000167518/ENSMUSG00000037503, intron 6 of 7)	ENSMUSG00000037503	ENSMUST00000170092	Fam168b	family with sequence similarity 168, member B	Mani|mKIAA4042
1_34834887_34835355	469	1_34834887_34835355	-	52	0	9.012	2.75344e-15	3.17747e-14	Up	Intron (ENSMUST00000167518/ENSMUSG00000037503, intron 6 of 7)	ENSMUSG00000037503	ENSMUST00000170092	Fam168b	family with sequence similarity 168, member B	Mani|mKIAA4042
1_34836229_34836561	333	-	1_34836229_34836561	0	24	-7.33971	2.47519e-06	4.01712e-06	Down	Intron (ENSMUST00000167518/ENSMUSG00000037503, intron 6 of 7)	ENSMUSG00000037503	ENSMUST00000170092	Fam168b	family with sequence similarity 168, member B	Mani|mKIAA4042
1_34851777_34852490	714	1_34851777_34852490	1_34851786_34852183	77	41	1.46884	2.28806e-05	3.39376e-05	Up	Promoter (<=1kb)	ENSMUSG00000026123	ENSMUST00000152654	Plekhb2	pleckstrin homology domain containing, family B (evectins) member 2	2310009M15Rik|AU018239|Evt2|Phdc|evt-2
1_34853290_34854145	856	-	1_34853290_34854145	0	82	-9.10598	3.93677e-16	5.44693e-15	Down	Intron (ENSMUST00000156687/ENSMUSG00000026123, intron 1 of 6)	ENSMUSG00000026123	ENSMUST00000152654	Plekhb2	pleckstrin homology domain containing, family B (evectins) member 2	2310009M15Rik|AU018239|Evt2|Phdc|evt-2
1_34855247_34855648	402	1_34855247_34855648	-	34	0	8.4005	1.42164e-10	4.99774e-10	Up	Intron (ENSMUST00000156687/ENSMUSG00000026123, intron 1 of 6)	ENSMUSG00000026123	ENSMUST00000152654	Plekhb2	pleckstrin homology domain containing, family B (evectins) member 2	2310009M15Rik|AU018239|Evt2|Phdc|evt-2
1_34857994_34858370	377	-	1_34857994_34858370	0	35	-7.88122	1.75007e-07	3.29918e-07	Down	Intron (ENSMUST00000156687/ENSMUSG00000026123, intron 1 of 6)	ENSMUSG00000026123	ENSMUST00000152654	Plekhb2	pleckstrin homology domain containing, family B (evectins) member 2	2310009M15Rik|AU018239|Evt2|Phdc|evt-2
1_34859386_34859819	434	1_34859386_34859819	-	44	0	8.7715	2.48909e-13	1.74548e-12	Up	Intron (ENSMUST00000156687/ENSMUSG00000026123, intron 1 of 6)	ENSMUSG00000026123	ENSMUST00000152654	Plekhb2	pleckstrin homology domain containing, family B (evectins) member 2	2310009M15Rik|AU018239|Evt2|Phdc|evt-2
1_34877480_34878023	544	-	1_34877480_34878023	0	35	-7.88122	1.75007e-07	3.29918e-07	Down	Promoter (<=1kb)	ENSMUSG00000026123	ENSMUST00000191722	Plekhb2	pleckstrin homology domain containing, family B (evectins) member 2	2310009M15Rik|AU018239|Evt2|Phdc|evt-2
1_34879249_34880019	771	1_34879249_34880019	-	66	0	9.35536	9.40652e-19	2.53261e-17	Up	3' UTR	ENSMUSG00000026123	ENSMUST00000191722	Plekhb2	pleckstrin homology domain containing, family B (evectins) member 2	2310009M15Rik|AU018239|Evt2|Phdc|evt-2
1_34880281_34881174	894	-	1_34880281_34881174	0	99	-9.37734	1.29533e-17	2.66172e-16	Down	Downstream (<1kb)	ENSMUSG00000026123	ENSMUST00000191722	Plekhb2	pleckstrin homology domain containing, family B (evectins) member 2	2310009M15Rik|AU018239|Evt2|Phdc|evt-2
1_35239187_35239497	311	-	1_35239187_35239497	0	28	-7.56082	4.812e-06	7.49864e-06	Down	Distal Intergenic	ENSMUSG00000077231	ENSMUST00000104043	Gm25096	-	-
1_35748795_35749144	350	-	1_35748795_35749144	0	29	-7.61119	2.75402e-06	4.40215e-06	Down	Distal Intergenic	ENSMUSG00000064601	ENSMUST00000082667	Gm25634	-	-
1_35822658_35822950	293	1_35822658_35822950	-	58	0	9.16925	9.51107e-17	1.54796e-15	Up	Distal Intergenic	ENSMUSG00000101714	ENSMUST00000187528	Gm28415	-	-
1_35831342_35831749	408	1_35831342_35831749	-	51	0	8.98404	4.49613e-15	4.86904e-14	Up	Distal Intergenic	ENSMUSG00000101714	ENSMUST00000187528	Gm28415	-	-
1_35944730_35945576	847	-	1_35944730_35945576	0	77	-9.01539	3.89954e-15	4.40038e-14	Down	Distal Intergenic	ENSMUSG00000103096	ENSMUST00000191763	Gm8022	-	-
1_35945832_35946074	243	1_35945832_35946074	-	35	0	8.4422	8.24314e-11	3.08621e-10	Up	Distal Intergenic	ENSMUSG00000103096	ENSMUST00000191763	Gm8022	-	-
1_35950786_35951209	424	-	1_35950786_35951209	0	29	-7.61119	2.75402e-06	4.40215e-06	Down	Distal Intergenic	ENSMUSG00000103096	ENSMUST00000191763	Gm8022	-	-
1_35981058_35981296	239	1_35981058_35981296	-	24	0	7.89978	7.04324e-08	1.37487e-07	Up	Downstream (<1kb)	ENSMUSG00000102279	ENSMUST00000192572	Gm37146	-	-
1_36015179_36015638	460	-	1_36015179_36015638	0	36	-7.9217	1.01568e-07	1.94955e-07	Down	Distal Intergenic	ENSMUSG00000104201	ENSMUST00000192017	4930535G08Rik	-	-
1_36015822_36019284	3463	1_36016952_36018724	1_36015822_36019284	163	530	-1.13768	2.65903e-06	4.31202e-06	Down	Distal Intergenic	ENSMUSG00000104201	ENSMUST00000192017	4930535G08Rik	-	-
1_36019527_36020216	690	-	1_36019527_36020216	0	51	-8.42245	1.79489e-10	6.15694e-10	Down	Distal Intergenic	ENSMUSG00000104201	ENSMUST00000192017	4930535G08Rik	-	-
1_36063797_36065597	1801	-	1_36063797_36065597	0	225	-10.5605	2.84587e-32	1.15247e-29	Down	Distal Intergenic	ENSMUSG00000045216	ENSMUST00000088174	Hs6st1	heparan sulfate 6-O-sulfotransferase 1	6Ost1
1_36069517_36069849	333	-	1_36069517_36069849	0	25	-7.39824	2.59951e-05	3.8153e-05	Down	Intron (ENSMUST00000088174/ENSMUSG00000045216, intron 1 of 1)	ENSMUSG00000045216	ENSMUST00000088174	Hs6st1	heparan sulfate 6-O-sulfotransferase 1	6Ost1
1_36074512_36074798	287	1_36074512_36074798	-	23	0	7.83864	2.27396e-07	4.21299e-07	Up	Intron (ENSMUST00000088174/ENSMUSG00000045216, intron 1 of 1)	ENSMUSG00000045216	ENSMUST00000088174	Hs6st1	heparan sulfate 6-O-sulfotransferase 1	6Ost1
1_36087435_36087890	456	-	1_36087435_36087890	0	35	-7.88122	1.75007e-07	3.29918e-07	Down	Intron (ENSMUST00000088174/ENSMUSG00000045216, intron 1 of 1)	ENSMUSG00000045216	ENSMUST00000194670	Hs6st1	heparan sulfate 6-O-sulfotransferase 1	6Ost1
1_36089418_36089661	244	1_36089418_36089661	-	25	0	7.95843	3.94049e-08	8.10452e-08	Up	Intron (ENSMUST00000088174/ENSMUSG00000045216, intron 1 of 1)	ENSMUSG00000045216	ENSMUST00000194670	Hs6st1	heparan sulfate 6-O-sulfotransferase 1	6Ost1
1_36145340_36145705	366	1_36145340_36145705	-	37	0	8.52215	1.63617e-11	7.0045e-11	Up	Promoter (1-2kb)	ENSMUSG00000098752	ENSMUST00000184790	Mir6897	microRNA 6897	Gm27652|mmu-mir-6897
1_36216793_36217129	337	1_36216793_36217129	-	30	0	8.2205	1.29729e-09	3.54454e-09	Up	Intron (ENSMUST00000046875/ENSMUSG00000037470, intron 36 of 40)	ENSMUSG00000037470	ENSMUST00000174142	Uggt1	UDP-glucose glycoprotein glucosyltransferase 1	0910001L17Rik|A930007H10Rik|AA589501|AI414429|AI448372|C820010P03Rik|GT|UGT1|Ugcgl1
1_36245016_36246038	1023	-	1_36245016_36246038	0	77	-9.01539	3.89954e-15	4.40038e-14	Down	Promoter (1-2kb)	ENSMUSG00000037470	ENSMUST00000192159	Uggt1	UDP-glucose glycoprotein glucosyltransferase 1	0910001L17Rik|A930007H10Rik|AA589501|AI414429|AI448372|C820010P03Rik|GT|UGT1|Ugcgl1
1_36250896_36251554	659	-	1_36250896_36251554	0	76	-8.99656	3.89954e-15	4.40038e-14	Down	Distal Intergenic	ENSMUSG00000037470	ENSMUST00000192159	Uggt1	UDP-glucose glycoprotein glucosyltransferase 1	0910001L17Rik|A930007H10Rik|AA589501|AI414429|AI448372|C820010P03Rik|GT|UGT1|Ugcgl1
1_36304553_36305253	701	-	1_36304553_36305253	0	43	-8.17707	4.08541e-09	1.01592e-08	Down	Distal Intergenic	ENSMUSG00000037447	ENSMUST00000126413	Arid5a	AT rich interactive domain 5A (MRF1-like)	D430024K22Rik|Mrf1
1_36306106_36306637	532	-	1_36306106_36306637	0	47	-8.30497	8.46962e-10	2.41856e-09	Down	Promoter (1-2kb)	ENSMUSG00000037447	ENSMUST00000126413	Arid5a	AT rich interactive domain 5A (MRF1-like)	D430024K22Rik|Mrf1
1_36306866_36307522	657	-	1_36306866_36307522	0	96	-9.33301	3.00402e-17	5.62136e-16	Down	Promoter (<=1kb)	ENSMUSG00000037447	ENSMUST00000126413	Arid5a	AT rich interactive domain 5A (MRF1-like)	D430024K22Rik|Mrf1
1_36368107_36368843	737	-	1_36368107_36368843	0	81	-9.08831	6.20214e-16	8.40808e-15	Down	Promoter (<=1kb)	ENSMUSG00000010453	ENSMUST00000188528	Kansl3	KAT8 regulatory NSL complex subunit 3	4632411B12Rik|4932435K23|AI431067|AI647574|C85723|Kiaa1310|mKIAA1310
1_36464760_36464998	239	1_36464760_36464998	-	28	0	8.12131	7.04361e-09	1.66011e-08	Up	Distal Intergenic	ENSMUSG00000037408	ENSMUST00000153128	Cnnm4	cyclin M4	5430430O18Rik|Acdp4
1_36471058_36471502	445	-	1_36471058_36471502	0	74	-8.95817	9.9007e-15	1.00274e-13	Down	Promoter (<=1kb)	ENSMUSG00000037408	ENSMUST00000153128	Cnnm4	cyclin M4	5430430O18Rik|Acdp4
1_36471831_36472189	359	-	1_36471831_36472189	0	51	-8.42245	1.79489e-10	6.15694e-10	Down	Promoter (<=1kb)	ENSMUSG00000037408	ENSMUST00000192530	Cnnm4	cyclin M4	5430430O18Rik|Acdp4
1_36517195_36517516	322	-	1_36517195_36517516	0	34	-7.83958	3.02271e-07	5.50653e-07	Down	Promoter (1-2kb)	ENSMUSG00000001138	ENSMUST00000195264	Cnnm3	cyclin M3	Acdp3|Clp3|mACDP3
1_36525026_36526035	1010	-	1_36525026_36526035	0	59	-8.63209	5.22709e-12	2.71383e-11	Down	3' UTR	ENSMUSG00000102845	ENSMUST00000192037	Gm38033	-	-
1_36526103_36526341	239	1_36526103_36526341	-	25	0	7.95843	3.94049e-08	8.10452e-08	Up	3' UTR	ENSMUSG00000102845	ENSMUST00000192037	Gm38033	-	-
1_36530345_36530766	422	-	1_36530345_36530766	0	46	-8.27404	1.42755e-09	3.85364e-09	Down	3' UTR	ENSMUSG00000102845	ENSMUST00000192037	Gm38033	-	-
1_36545729_36545968	240	1_36545729_36545968	-	22	0	7.7748	4.1078e-07	7.32295e-07	Up	Exon (ENSMUST00000208269/ENSMUSG00000079610, exon 1 of 1)	ENSMUSG00000079610	ENSMUST00000207843	Ankrd39	ankyrin repeat domain 39	9130416N05Rik|C030004B10Rik
1_36550653_36551074	422	1_36550653_36551074	-	28	0	8.12131	7.04361e-09	1.66011e-08	Up	Exon (ENSMUST00000191677/ENSMUSG00000026121, exon 13 of 15)	ENSMUSG00000026121	ENSMUST00000191785	Sema4c	sema domain, immunoglobulin domain (Ig), transmembrane domain (TM) and short cytoplasmic domain, (semaphorin) 4C	AI426163|M-Sema F|Semacl1|Semaf|Semai|sema I
1_36554390_36558351	3962	1_36555713_36557209;1_36557404_36558187	1_36554390_36558351	594	1815	-1.04835	1.37722e-06	2.30681e-06	Down	Promoter (<=1kb)	ENSMUSG00000026121	ENSMUST00000191677	Sema4c	sema domain, immunoglobulin domain (Ig), transmembrane domain (TM) and short cytoplasmic domain, (semaphorin) 4C	AI426163|M-Sema F|Semacl1|Semaf|Semai|sema I
1_36559729_36560200	472	1_36559729_36560200	-	49	0	8.92644	1.20778e-14	1.17285e-13	Up	Intron (ENSMUST00000149224/ENSMUSG00000087589, intron 1 of 2)	ENSMUSG00000087589	ENSMUST00000149224	D430040D24Rik	-	-
1_36562854_36563092	239	1_36562854_36563092	-	32	0	8.31331	4.26767e-10	1.30949e-09	Up	3' UTR	ENSMUSG00000087589	ENSMUST00000149224	D430040D24Rik	-	-
1_36565844_36566085	242	1_36565844_36566085	-	31	0	8.26765	7.42892e-10	2.14936e-09	Up	Intron (ENSMUST00000170295/ENSMUSG00000046337, intron 3 of 14)	ENSMUSG00000046337	ENSMUST00000149224	Fam178b	family with sequence similarity 178, member B	1700024G10Rik|Gm990
1_36569702_36570095	394	-	1_36569702_36570095	0	40	-8.0731	2.01468e-08	4.43681e-08	Down	Intron (ENSMUST00000170295/ENSMUSG00000046337, intron 3 of 14)	ENSMUSG00000046337	ENSMUST00000149224	Fam178b	family with sequence similarity 178, member B	1700024G10Rik|Gm990
1_36570154_36570451	298	1_36570154_36570451	-	32	0	8.31331	4.26767e-10	1.30949e-09	Up	Intron (ENSMUST00000170295/ENSMUSG00000046337, intron 3 of 14)	ENSMUSG00000046337	ENSMUST00000149224	Fam178b	family with sequence similarity 178, member B	1700024G10Rik|Gm990
1_36576462_36577393	932	-	1_36576462_36577393	0	62	-8.70347	1.18945e-12	7.10233e-12	Down	Exon (ENSMUST00000195729/ENSMUSG00000046337, exon 5 of 5)	ENSMUSG00000046337	ENSMUST00000193155	Fam178b	family with sequence similarity 178, member B	1700024G10Rik|Gm990
1_36578022_36578730	709	-	1_36578022_36578730	0	44	-8.21012	2.41201e-09	6.33597e-09	Down	3' UTR	ENSMUSG00000046337	ENSMUST00000193155	Fam178b	family with sequence similarity 178, member B	1700024G10Rik|Gm990
1_36579109_36581883	2775	1_36579609_36581170	1_36579109_36581883	266	817	-1.05567	4.1457e-06	6.59995e-06	Down	Intron (ENSMUST00000170295/ENSMUSG00000046337, intron 4 of 14)	ENSMUSG00000046337	ENSMUST00000193155	Fam178b	family with sequence similarity 178, member B	1700024G10Rik|Gm990
1_36582287_36582644	358	-	1_36582287_36582644	0	33	-7.79671	5.23325e-07	9.17763e-07	Down	Intron (ENSMUST00000170295/ENSMUSG00000046337, intron 4 of 14)	ENSMUSG00000046337	ENSMUST00000193155	Fam178b	family with sequence similarity 178, member B	1700024G10Rik|Gm990
1_36583186_36583694	509	-	1_36583186_36583694	0	38	-7.99939	5.909e-08	1.17873e-07	Down	Intron (ENSMUST00000170295/ENSMUSG00000046337, intron 4 of 14)	ENSMUSG00000046337	ENSMUST00000193155	Fam178b	family with sequence similarity 178, member B	1700024G10Rik|Gm990
1_36586792_36587183	392	-	1_36586792_36587183	0	30	-7.65985	1.5797e-06	2.60196e-06	Down	Intron (ENSMUST00000170295/ENSMUSG00000046337, intron 5 of 14)	ENSMUSG00000046337	ENSMUST00000193155	Fam178b	family with sequence similarity 178, member B	1700024G10Rik|Gm990
1_36589335_36589573	239	1_36589335_36589573	-	21	0	7.708	4.1078e-07	7.32295e-07	Up	Promoter (<=1kb)	ENSMUSG00000046337	ENSMUST00000193548	Fam178b	family with sequence similarity 178, member B	1700024G10Rik|Gm990
1_36611570_36612064	495	-	1_36611570_36612064	0	37	-7.96106	5.909e-08	1.17873e-07	Down	Intron (ENSMUST00000170295/ENSMUSG00000046337, intron 9 of 14)	ENSMUSG00000046337	ENSMUST00000161062	Fam178b	family with sequence similarity 178, member B	1700024G10Rik|Gm990
1_36612516_36613085	570	-	1_36612516_36613085	0	35	-7.88122	1.75007e-07	3.29918e-07	Down	Intron (ENSMUST00000170295/ENSMUSG00000046337, intron 9 of 14)	ENSMUSG00000046337	ENSMUST00000161062	Fam178b	family with sequence similarity 178, member B	1700024G10Rik|Gm990
1_36703550_36703927	378	-	1_36703550_36703927	0	27	-7.50864	8.426e-06	1.282e-05	Down	Intron (ENSMUST00000043951/ENSMUSG00000037351, intron 8 of 10)	ENSMUSG00000037351	ENSMUST00000159675	Actr1b	ARP1 actin-related protein 1B, centractin beta	2310066K23Rik|AA960180|AI851923|Arp1b
1_36708735_36710035	1301	1_36709445_36709929	1_36708735_36710035	98	347	-1.26026	1.56238e-06	2.60196e-06	Down	Promoter (<=1kb)	ENSMUSG00000037351	ENSMUST00000043951	Actr1b	ARP1 actin-related protein 1B, centractin beta	2310066K23Rik|AA960180|AI851923|Arp1b
1_36756906_36757192	287	1_36756906_36757192	-	30	0	8.2205	1.29729e-09	3.54454e-09	Up	Intron (ENSMUST00000208994/ENSMUSG00000102416, intron 8 of 8)	ENSMUSG00000102416	ENSMUST00000027291	4933424G06Rik	RIKEN cDNA 4933424G06 gene	1700104I15Rik
1_36790162_36790664	503	-	1_36790162_36790664	0	29	-7.61119	2.75402e-06	4.40215e-06	Down	Downstream (1-2kb)	ENSMUSG00000026117	ENSMUST00000190128	Zap70	zeta-chain (TCR) associated protein kinase	Srk|ZAP-70|mrtle|mur
1_36808879_36809144	266	1_36808879_36809144	-	25	0	7.95843	3.94049e-08	8.10452e-08	Up	Exon (ENSMUST00000027290/ENSMUSG00000026116, exon 30 of 41)	ENSMUSG00000026116	ENSMUST00000187917	Tmem131	transmembrane protein 131	2610524E03Rik|CC28|D1Bwg0491e|Neg|RW1|YR-23|mKIAA0257
1_36838056_36838663	608	1_36838056_36838663	-	47	0	8.86645	5.41924e-14	4.56184e-13	Up	Intron (ENSMUST00000027290/ENSMUSG00000026116, intron 34 of 40)	ENSMUSG00000026116	ENSMUST00000186486	Tmem131	transmembrane protein 131	2610524E03Rik|CC28|D1Bwg0491e|Neg|RW1|YR-23|mKIAA0257
1_36840990_36841230	241	1_36840990_36841230	-	29	0	8.17176	3.99443e-09	1.00658e-08	Up	Intron (ENSMUST00000027290/ENSMUSG00000026116, intron 35 of 40)	ENSMUSG00000026116	ENSMUST00000186486	Tmem131	transmembrane protein 131	2610524E03Rik|CC28|D1Bwg0491e|Neg|RW1|YR-23|mKIAA0257
1_36843432_36843771	340	1_36843432_36843771	-	39	0	8.59789	5.64977e-12	2.78967e-11	Up	Intron (ENSMUST00000027290/ENSMUSG00000026116, intron 36 of 40)	ENSMUSG00000026116	ENSMUST00000186486	Tmem131	transmembrane protein 131	2610524E03Rik|CC28|D1Bwg0491e|Neg|RW1|YR-23|mKIAA0257
1_36844352_36844590	239	1_36844352_36844590	-	23	0	7.83864	2.27396e-07	4.21299e-07	Up	Intron (ENSMUST00000027290/ENSMUSG00000026116, intron 36 of 40)	ENSMUSG00000026116	ENSMUST00000186486	Tmem131	transmembrane protein 131	2610524E03Rik|CC28|D1Bwg0491e|Neg|RW1|YR-23|mKIAA0257
1_36851566_36852032	467	1_36851566_36852032	-	40	0	8.63433	3.33429e-12	1.75371e-11	Up	Intron (ENSMUST00000027290/ENSMUSG00000026116, intron 36 of 40)	ENSMUSG00000026116	ENSMUST00000192008	Tmem131	transmembrane protein 131	2610524E03Rik|CC28|D1Bwg0491e|Neg|RW1|YR-23|mKIAA0257
1_36854010_36854352	343	1_36854010_36854352	-	44	0	8.7715	2.48909e-13	1.74548e-12	Up	Intron (ENSMUST00000027290/ENSMUSG00000026116, intron 36 of 40)	ENSMUSG00000026116	ENSMUST00000192008	Tmem131	transmembrane protein 131	2610524E03Rik|CC28|D1Bwg0491e|Neg|RW1|YR-23|mKIAA0257
1_36854570_36855095	526	1_36854570_36855095	-	59	0	9.19387	5.93548e-17	1.01453e-15	Up	Exon (ENSMUST00000027290/ENSMUSG00000026116, exon 5 of 41)	ENSMUSG00000026116	ENSMUST00000192008	Tmem131	transmembrane protein 131	2610524E03Rik|CC28|D1Bwg0491e|Neg|RW1|YR-23|mKIAA0257
1_36855356_36856723	1368	1_36855356_36856723	-	152	0	10.5576	5.12278e-35	3.61193e-32	Up	Intron (ENSMUST00000027290/ENSMUSG00000026116, intron 37 of 40)	ENSMUSG00000026116	ENSMUST00000192008	Tmem131	transmembrane protein 131	2610524E03Rik|CC28|D1Bwg0491e|Neg|RW1|YR-23|mKIAA0257
1_36887984_36888527	544	1_36887984_36888527	-	51	0	8.98404	4.49613e-15	4.86904e-14	Up	Intron (ENSMUST00000027290/ENSMUSG00000026116, intron 39 of 40)	ENSMUSG00000026116	ENSMUST00000192008	Tmem131	transmembrane protein 131	2610524E03Rik|CC28|D1Bwg0491e|Neg|RW1|YR-23|mKIAA0257
1_36907244_36907837	594	-	1_36907244_36907837	0	33	-7.79671	5.23325e-07	9.17763e-07	Down	Intron (ENSMUST00000027290/ENSMUSG00000026116, intron 40 of 40)	ENSMUSG00000026116	ENSMUST00000194317	Tmem131	transmembrane protein 131	2610524E03Rik|CC28|D1Bwg0491e|Neg|RW1|YR-23|mKIAA0257
1_36910621_36911173	553	1_36910621_36911173	-	74	0	9.52018	1.76288e-20	6.96056e-19	Up	Intron (ENSMUST00000027290/ENSMUSG00000026116, intron 40 of 40)	ENSMUSG00000026116	ENSMUST00000194317	Tmem131	transmembrane protein 131	2610524E03Rik|CC28|D1Bwg0491e|Neg|RW1|YR-23|mKIAA0257
1_36911875_36912315	441	1_36911875_36912315	-	43	0	8.73841	4.15962e-13	2.73662e-12	Up	Intron (ENSMUST00000027290/ENSMUSG00000026116, intron 40 of 40)	ENSMUSG00000026116	ENSMUST00000194317	Tmem131	transmembrane protein 131	2610524E03Rik|CC28|D1Bwg0491e|Neg|RW1|YR-23|mKIAA0257
1_36918849_36919159	311	-	1_36918849_36919159	0	28	-7.56082	4.812e-06	7.49864e-06	Down	Intron (ENSMUST00000027290/ENSMUSG00000026116, intron 40 of 40)	ENSMUSG00000026116	ENSMUST00000194317	Tmem131	transmembrane protein 131	2610524E03Rik|CC28|D1Bwg0491e|Neg|RW1|YR-23|mKIAA0257
1_36919693_36920092	400	-	1_36919693_36920092	0	34	-7.83958	3.02271e-07	5.50653e-07	Down	Intron (ENSMUST00000027290/ENSMUSG00000026116, intron 40 of 40)	ENSMUSG00000026116	ENSMUST00000194317	Tmem131	transmembrane protein 131	2610524E03Rik|CC28|D1Bwg0491e|Neg|RW1|YR-23|mKIAA0257
1_36920139_36920402	264	1_36920139_36920402	-	35	0	8.4422	8.24314e-11	3.08621e-10	Up	Intron (ENSMUST00000027290/ENSMUSG00000026116, intron 40 of 40)	ENSMUSG00000026116	ENSMUST00000194317	Tmem131	transmembrane protein 131	2610524E03Rik|CC28|D1Bwg0491e|Neg|RW1|YR-23|mKIAA0257
1_36986593_36986957	365	-	1_36986593_36986957	0	23	-7.27869	4.53786e-06	7.16963e-06	Down	Distal Intergenic	ENSMUSG00000095944	ENSMUST00000177688	n-R5s210	-	-
1_36990424_36990855	432	-	1_36990424_36990855	0	40	-8.0731	2.01468e-08	4.43681e-08	Down	Distal Intergenic	ENSMUSG00000095944	ENSMUST00000177688	n-R5s210	-	-
1_37034766_37035076	311	-	1_37034766_37035076	0	24	-7.33971	2.47519e-06	4.01712e-06	Down	Promoter (<=1kb)	ENSMUSG00000050122	ENSMUST00000027289	Vwa3b	von Willebrand factor A domain containing 3B	4921511C04Rik|A230074B11Rik|Gm555
1_37047487_37049163	1677	1_37048482_37048935	1_37047487_37049163	41	196	-1.69175	4.79784e-08	9.85425e-08	Down	Intron (ENSMUST00000117172/ENSMUSG00000050122, intron 4 of 7)	ENSMUSG00000050122	ENSMUST00000027289	Vwa3b	von Willebrand factor A domain containing 3B	4921511C04Rik|A230074B11Rik|Gm555
1_37049525_37051695	2171	1_37049525_37049763;1_37050102_37050405	1_37049525_37051695	52	208	-1.43528	1.82021e-06	2.99367e-06	Down	Intron (ENSMUST00000117172/ENSMUSG00000050122, intron 4 of 7)	ENSMUSG00000050122	ENSMUST00000027289	Vwa3b	von Willebrand factor A domain containing 3B	4921511C04Rik|A230074B11Rik|Gm555
1_37061423_37061835	413	-	1_37061423_37061835	0	32	-7.75251	9.08175e-07	1.53104e-06	Down	Intron (ENSMUST00000117172/ENSMUSG00000050122, intron 6 of 7)	ENSMUSG00000050122	ENSMUST00000027289	Vwa3b	von Willebrand factor A domain containing 3B	4921511C04Rik|A230074B11Rik|Gm555
1_37070527_37070838	312	1_37070527_37070838	-	39	0	8.59789	5.64977e-12	2.78967e-11	Up	Intron (ENSMUST00000117172/ENSMUSG00000050122, intron 7 of 7)	ENSMUSG00000050122	ENSMUST00000194890	Vwa3b	von Willebrand factor A domain containing 3B	4921511C04Rik|A230074B11Rik|Gm555
1_37082637_37083427	791	1_37082637_37083427	-	72	0	9.48071	4.20784e-20	1.51936e-18	Up	Intron (ENSMUST00000027289/ENSMUSG00000050122, intron 6 of 24)	ENSMUSG00000050122	ENSMUST00000194890	Vwa3b	von Willebrand factor A domain containing 3B	4921511C04Rik|A230074B11Rik|Gm555
1_37083977_37084401	425	1_37083977_37084401	-	38	0	8.56052	9.60067e-12	4.38615e-11	Up	Intron (ENSMUST00000027289/ENSMUSG00000050122, intron 6 of 24)	ENSMUSG00000050122	ENSMUST00000194890	Vwa3b	von Willebrand factor A domain containing 3B	4921511C04Rik|A230074B11Rik|Gm555
1_37084939_37085302	364	1_37084939_37085302	-	48	0	8.89676	3.27725e-14	2.96107e-13	Up	Exon (ENSMUST00000027289/ENSMUSG00000050122, exon 7 of 25)	ENSMUSG00000050122	ENSMUST00000194890	Vwa3b	von Willebrand factor A domain containing 3B	4921511C04Rik|A230074B11Rik|Gm555
1_37085557_37086705	1149	1_37085557_37086705	1_37085945_37086514	108	39	2.02828	1.02623e-09	2.92668e-09	Up	Intron (ENSMUST00000027289/ENSMUSG00000050122, intron 7 of 24)	ENSMUSG00000050122	ENSMUST00000194890	Vwa3b	von Willebrand factor A domain containing 3B	4921511C04Rik|A230074B11Rik|Gm555
1_37087499_37087876	378	1_37087499_37087876	-	43	0	8.73841	4.15962e-13	2.73662e-12	Up	Intron (ENSMUST00000027289/ENSMUSG00000050122, intron 7 of 24)	ENSMUSG00000050122	ENSMUST00000194890	Vwa3b	von Willebrand factor A domain containing 3B	4921511C04Rik|A230074B11Rik|Gm555
1_37088679_37089169	491	1_37088679_37089169	-	37	0	8.52215	1.63617e-11	7.0045e-11	Up	Intron (ENSMUST00000027289/ENSMUSG00000050122, intron 7 of 24)	ENSMUSG00000050122	ENSMUST00000194890	Vwa3b	von Willebrand factor A domain containing 3B	4921511C04Rik|A230074B11Rik|Gm555
1_37104793_37105365	573	1_37104793_37105365	-	48	0	8.89676	3.27725e-14	2.96107e-13	Up	Intron (ENSMUST00000027289/ENSMUSG00000050122, intron 8 of 24)	ENSMUSG00000050122	ENSMUST00000194048	Vwa3b	von Willebrand factor A domain containing 3B	4921511C04Rik|A230074B11Rik|Gm555
1_37108187_37108425	239	1_37108187_37108425	-	21	0	7.708	4.1078e-07	7.32295e-07	Up	Intron (ENSMUST00000027289/ENSMUSG00000050122, intron 8 of 24)	ENSMUSG00000050122	ENSMUST00000194048	Vwa3b	von Willebrand factor A domain containing 3B	4921511C04Rik|A230074B11Rik|Gm555
1_37109336_37110194	859	1_37109336_37110194	-	58	0	9.16925	9.51107e-17	1.54796e-15	Up	Intron (ENSMUST00000027289/ENSMUSG00000050122, intron 9 of 24)	ENSMUSG00000050122	ENSMUST00000194048	Vwa3b	von Willebrand factor A domain containing 3B	4921511C04Rik|A230074B11Rik|Gm555
1_37110805_37111266	462	1_37110805_37111266	-	39	0	8.59789	5.64977e-12	2.78967e-11	Up	Intron (ENSMUST00000027289/ENSMUSG00000050122, intron 9 of 24)	ENSMUSG00000050122	ENSMUST00000194048	Vwa3b	von Willebrand factor A domain containing 3B	4921511C04Rik|A230074B11Rik|Gm555
1_37114692_37115264	573	1_37114692_37115264	-	48	0	8.89676	3.27725e-14	2.96107e-13	Up	Intron (ENSMUST00000027289/ENSMUSG00000050122, intron 10 of 24)	ENSMUSG00000050122	ENSMUST00000194048	Vwa3b	von Willebrand factor A domain containing 3B	4921511C04Rik|A230074B11Rik|Gm555
1_37120960_37121237	278	1_37120960_37121237	-	34	0	8.4005	1.42164e-10	4.99774e-10	Up	Intron (ENSMUST00000027289/ENSMUSG00000050122, intron 11 of 24)	ENSMUSG00000050122	ENSMUST00000195303	Vwa3b	von Willebrand factor A domain containing 3B	4921511C04Rik|A230074B11Rik|Gm555
1_37122014_37122468	455	1_37122014_37122468	-	52	0	9.012	2.75344e-15	3.17747e-14	Up	Intron (ENSMUST00000027289/ENSMUSG00000050122, intron 11 of 24)	ENSMUSG00000050122	ENSMUST00000195303	Vwa3b	von Willebrand factor A domain containing 3B	4921511C04Rik|A230074B11Rik|Gm555
1_37130577_37130887	311	-	1_37130577_37130887	0	23	-7.27869	4.53786e-06	7.16963e-06	Down	Intron (ENSMUST00000027289/ENSMUSG00000050122, intron 13 of 24)	ENSMUSG00000050122	ENSMUST00000195303	Vwa3b	von Willebrand factor A domain containing 3B	4921511C04Rik|A230074B11Rik|Gm555
1_37199369_37199748	380	1_37199369_37199748	-	36	0	8.48273	4.79413e-11	1.90587e-10	Up	Distal Intergenic	ENSMUSG00000050122	ENSMUST00000194320	Vwa3b	von Willebrand factor A domain containing 3B	4921511C04Rik|A230074B11Rik|Gm555
1_37200682_37201124	443	-	1_37200682_37201124	0	36	-7.9217	1.01568e-07	1.94955e-07	Down	Distal Intergenic	ENSMUSG00000026114	ENSMUST00000191981	Cnga3	cyclic nucleotide gated channel alpha 3	CNG3
1_37203113_37203529	417	1_37203113_37203529	-	32	0	8.31331	4.26767e-10	1.30949e-09	Up	Distal Intergenic	ENSMUSG00000026114	ENSMUST00000191981	Cnga3	cyclic nucleotide gated channel alpha 3	CNG3
1_37204219_37204502	284	1_37204219_37204502	-	28	0	8.12131	7.04361e-09	1.66011e-08	Up	Distal Intergenic	ENSMUSG00000026114	ENSMUST00000191981	Cnga3	cyclic nucleotide gated channel alpha 3	CNG3
1_37205677_37206111	435	1_37205677_37206111	-	34	0	8.4005	1.42164e-10	4.99774e-10	Up	Distal Intergenic	ENSMUSG00000026114	ENSMUST00000191981	Cnga3	cyclic nucleotide gated channel alpha 3	CNG3
1_37207166_37207887	722	-	1_37207166_37207887	0	48	-8.33525	5.03731e-10	1.52689e-09	Down	Distal Intergenic	ENSMUSG00000026114	ENSMUST00000191981	Cnga3	cyclic nucleotide gated channel alpha 3	CNG3
1_37209835_37210151	317	1_37209835_37210151	-	37	0	8.52215	1.63617e-11	7.0045e-11	Up	Distal Intergenic	ENSMUSG00000026114	ENSMUST00000191981	Cnga3	cyclic nucleotide gated channel alpha 3	CNG3
1_37210396_37211663	1268	1_37210396_37211663	1_37210405_37211456	110	72	1.17273	0.000126954	0.000181641	Up	Distal Intergenic	ENSMUSG00000026114	ENSMUST00000191981	Cnga3	cyclic nucleotide gated channel alpha 3	CNG3
1_37217626_37218189	564	-	1_37217626_37218189	0	48	-8.33525	5.03731e-10	1.52689e-09	Down	Promoter (<=1kb)	ENSMUSG00000026114	ENSMUST00000194195	Cnga3	cyclic nucleotide gated channel alpha 3	CNG3
1_37238524_37238848	325	1_37238524_37238848	-	28	0	8.12131	7.04361e-09	1.66011e-08	Up	Intron (ENSMUST00000191981/ENSMUSG00000026114, intron 4 of 4)	ENSMUSG00000026114	ENSMUST00000027288	Cnga3	cyclic nucleotide gated channel alpha 3	CNG3
1_37240078_37240365	288	1_37240078_37240365	-	24	0	7.89978	7.04324e-08	1.37487e-07	Up	Intron (ENSMUST00000191981/ENSMUSG00000026114, intron 4 of 4)	ENSMUSG00000026114	ENSMUST00000027288	Cnga3	cyclic nucleotide gated channel alpha 3	CNG3
1_37242112_37242369	258	1_37242112_37242369	-	28	0	8.12131	7.04361e-09	1.66011e-08	Up	Intron (ENSMUST00000194195/ENSMUSG00000026114, intron 2 of 5)	ENSMUSG00000026114	ENSMUST00000027288	Cnga3	cyclic nucleotide gated channel alpha 3	CNG3
1_37429637_37431015	1379	-	1_37429637_37431015	0	174	-10.19	8.15068e-28	1.39016e-25	Down	Promoter (<=1kb)	ENSMUSG00000026111	ENSMUST00000114925	Unc50	unc-50 homolog (C. elegans)	1110002A21Rik|GMH1|UNCL|URP
1_37671253_37671531	279	1_37671253_37671531	-	34	0	8.4005	1.42164e-10	4.99774e-10	Up	Intron (ENSMUST00000162875/ENSMUSG00000026090, intron 9 of 9)	ENSMUSG00000026090	ENSMUST00000192005	2010300C02Rik	RIKEN cDNA 2010300C02 gene	-
1_37864551_37864889	339	-	1_37864551_37864889	0	70	-8.87816	4.06981e-14	3.58689e-13	Down	Promoter (<=1kb)	ENSMUSG00000060771	ENSMUST00000123082	Tsga10	testis specific 10	4933432N21Rik|AI843383|Gm217|Mtsga10
1_37865342_37865673	332	-	1_37865342_37865673	0	61	-8.68007	1.9438e-12	1.10472e-11	Down	Promoter (<=1kb)	ENSMUSG00000097268	ENSMUST00000181885	Gm26805	-	-
1_37872268_37873000	733	1_37872268_37872574	1_37872273_37873000	35	105	-1.0199	0.00326531	0.00438693	Down	Promoter (<=1kb)	ENSMUSG00000037216	ENSMUST00000142670	Lipt1	lipoyltransferase 1	EG623661
1_37879809_37880078	270	1_37879809_37880078	-	22	0	7.7748	4.1078e-07	7.32295e-07	Up	Promoter (<=1kb)	ENSMUSG00000026088	ENSMUST00000131754	Mitd1	MIT, microtubule interacting and transport, domain containing 1	1500032H18Rik
1_37889438_37890256	819	-	1_37889438_37890256	0	56	-8.557	1.41877e-11	6.40067e-11	Down	Promoter (<=1kb)	ENSMUSG00000026087	ENSMUST00000027256	Mrpl30	mitochondrial ribosomal protein L30	2310001L22Rik|L30mt|MRP-L28|MRP-L30|Rpml28
1_37996464_37998108	1645	1_37996919_37997201;1_37997505_37997933	1_37996464_37998108	150	451	-1.02472	3.29371e-05	4.80798e-05	Down	Promoter (<=1kb)	ENSMUSG00000026083	ENSMUST00000027252	Eif5b	eukaryotic translation initiation factor 5B	A030003E17Rik|BC018347|IF2
1_37998668_37999110	443	-	1_37998668_37999110	0	44	-8.21012	2.41201e-09	6.33597e-09	Down	Intron (ENSMUST00000027252/ENSMUSG00000026083, intron 1 of 23)	ENSMUSG00000026083	ENSMUST00000192548	Eif5b	eukaryotic translation initiation factor 5B	A030003E17Rik|BC018347|IF2
1_38005157_38005529	373	-	1_38005157_38005529	0	26	-7.4545	1.47851e-05	2.21227e-05	Down	Intron (ENSMUST00000027252/ENSMUSG00000026083, intron 1 of 23)	ENSMUSG00000026083	ENSMUST00000192548	Eif5b	eukaryotic translation initiation factor 5B	A030003E17Rik|BC018347|IF2
1_38006106_38007072	967	1_38006106_38006374	1_38006123_38007072	28	91	-1.13466	0.00199822	0.00271747	Down	Intron (ENSMUST00000027252/ENSMUSG00000026083, intron 1 of 23)	ENSMUSG00000026083	ENSMUST00000192548	Eif5b	eukaryotic translation initiation factor 5B	A030003E17Rik|BC018347|IF2
1_38009096_38009337	242	1_38009096_38009337	-	28	0	8.12131	7.04361e-09	1.66011e-08	Up	Intron (ENSMUST00000027252/ENSMUSG00000026083, intron 1 of 23)	ENSMUSG00000026083	ENSMUST00000192548	Eif5b	eukaryotic translation initiation factor 5B	A030003E17Rik|BC018347|IF2
1_38025595_38025890	296	1_38025595_38025890	-	21	0	7.708	4.1078e-07	7.32295e-07	Up	Intron (ENSMUST00000027252/ENSMUSG00000026083, intron 6 of 23)	ENSMUSG00000026083	ENSMUST00000193806	Eif5b	eukaryotic translation initiation factor 5B	A030003E17Rik|BC018347|IF2
1_38074050_38074898	849	-	1_38074050_38074898	0	52	-8.45038	1.07531e-10	3.97431e-10	Down	3' UTR	ENSMUSG00000103804	ENSMUST00000195028	Gm37062	-	-
1_38128403_38129149	747	-	1_38128403_38129149	0	50	-8.39396	1.79489e-10	6.15694e-10	Down	Promoter (<=1kb)	ENSMUSG00000026082	ENSMUST00000193697	Rev1	REV1, DNA directed polymerase	1110027I23Rik|AU022044|Rev1l
1_38130083_38130587	505	-	1_38130083_38130587	0	105	-9.4621	1.62839e-18	4.28349e-17	Down	Promoter (<=1kb)	ENSMUSG00000026082	ENSMUST00000195383	Rev1	REV1, DNA directed polymerase	1110027I23Rik|AU022044|Rev1l
1_38199928_38200339	412	-	1_38199928_38200339	0	79	-9.05231	1.54878e-15	1.96915e-14	Down	Intron (ENSMUST00000095027/ENSMUSG00000037138, intron 7 of 21)	ENSMUSG00000037138	ENSMUST00000136641	Aff3	AF4/FMR2 family, member 3	3222402O04Rik|A730046J16|LAF-4|Laf4
1_38394070_38394380	311	-	1_38394070_38394380	0	29	-7.61119	2.75402e-06	4.40215e-06	Down	Intron (ENSMUST00000095027/ENSMUSG00000037138, intron 17 of 21)	ENSMUSG00000037138	ENSMUST00000131663	Aff3	AF4/FMR2 family, member 3	3222402O04Rik|A730046J16|LAF-4|Laf4
1_38417156_38417466	311	-	1_38417156_38417466	0	20	-7.07845	2.86152e-05	4.18444e-05	Down	Intron (ENSMUST00000095027/ENSMUSG00000037138, intron 18 of 21)	ENSMUSG00000037138	ENSMUST00000131663	Aff3	AF4/FMR2 family, member 3	3222402O04Rik|A730046J16|LAF-4|Laf4
1_38442098_38442466	369	1_38442098_38442466	-	36	0	8.48273	4.79413e-11	1.90587e-10	Up	Intron (ENSMUST00000095027/ENSMUSG00000037138, intron 18 of 21)	ENSMUSG00000037138	ENSMUST00000195175	Aff3	AF4/FMR2 family, member 3	3222402O04Rik|A730046J16|LAF-4|Laf4
1_38562577_38563039	463	-	1_38562577_38563039	0	30	-7.65985	1.5797e-06	2.60196e-06	Down	Intron (ENSMUST00000095027/ENSMUSG00000037138, intron 21 of 21)	ENSMUSG00000037138	ENSMUST00000095027	Aff3	AF4/FMR2 family, member 3	3222402O04Rik|A730046J16|LAF-4|Laf4
1_38601250_38601638	389	1_38601250_38601638	-	33	0	8.35756	2.45934e-10	8.02848e-10	Up	Intron (ENSMUST00000095027/ENSMUSG00000037138, intron 21 of 21)	ENSMUSG00000037138	ENSMUST00000095027	Aff3	AF4/FMR2 family, member 3	3222402O04Rik|A730046J16|LAF-4|Laf4
1_38602095_38602333	239	1_38602095_38602333	-	29	0	8.17176	3.99443e-09	1.00658e-08	Up	Intron (ENSMUST00000095027/ENSMUSG00000037138, intron 21 of 21)	ENSMUSG00000037138	ENSMUST00000095027	Aff3	AF4/FMR2 family, member 3	3222402O04Rik|A730046J16|LAF-4|Laf4
1_38609085_38609433	349	1_38609085_38609433	-	30	0	8.2205	1.29729e-09	3.54454e-09	Up	Intron (ENSMUST00000095027/ENSMUSG00000037138, intron 21 of 21)	ENSMUSG00000037138	ENSMUST00000095027	Aff3	AF4/FMR2 family, member 3	3222402O04Rik|A730046J16|LAF-4|Laf4
1_38609878_38610157	280	1_38609878_38610157	-	26	0	8.01479	2.21221e-08	4.74092e-08	Up	Intron (ENSMUST00000095027/ENSMUSG00000037138, intron 21 of 21)	ENSMUSG00000037138	ENSMUST00000095027	Aff3	AF4/FMR2 family, member 3	3222402O04Rik|A730046J16|LAF-4|Laf4
1_38624529_38624884	356	-	1_38624529_38624884	0	31	-7.70693	9.08175e-07	1.53104e-06	Down	Intron (ENSMUST00000095027/ENSMUSG00000037138, intron 21 of 21)	ENSMUSG00000037138	ENSMUST00000095027	Aff3	AF4/FMR2 family, member 3	3222402O04Rik|A730046J16|LAF-4|Laf4
1_38626276_38626803	528	-	1_38626276_38626803	0	43	-8.17707	4.08541e-09	1.01592e-08	Down	Intron (ENSMUST00000095027/ENSMUSG00000037138, intron 21 of 21)	ENSMUSG00000037138	ENSMUST00000095027	Aff3	AF4/FMR2 family, member 3	3222402O04Rik|A730046J16|LAF-4|Laf4
1_38627718_38628509	792	1_38627811_38628049	1_38627718_38628509	30	134	-1.593	3.23032e-06	5.15701e-06	Down	Promoter (1-2kb)	ENSMUSG00000037138	ENSMUST00000095027	Aff3	AF4/FMR2 family, member 3	3222402O04Rik|A730046J16|LAF-4|Laf4
1_38646580_38647128	549	-	1_38646580_38647128	0	44	-8.21012	2.41201e-09	6.33597e-09	Down	Intron (ENSMUST00000039827/ENSMUSG00000037138, intron 22 of 22)	ENSMUSG00000037138	ENSMUST00000039827	Aff3	AF4/FMR2 family, member 3	3222402O04Rik|A730046J16|LAF-4|Laf4
1_38651790_38652268	479	-	1_38651790_38652268	0	40	-8.0731	2.01468e-08	4.43681e-08	Down	Intron (ENSMUST00000039827/ENSMUSG00000037138, intron 22 of 22)	ENSMUSG00000037138	ENSMUST00000039827	Aff3	AF4/FMR2 family, member 3	3222402O04Rik|A730046J16|LAF-4|Laf4
1_38652660_38652971	312	-	1_38652660_38652971	0	27	-7.50864	8.426e-06	1.282e-05	Down	Intron (ENSMUST00000039827/ENSMUSG00000037138, intron 22 of 22)	ENSMUSG00000037138	ENSMUST00000039827	Aff3	AF4/FMR2 family, member 3	3222402O04Rik|A730046J16|LAF-4|Laf4
1_38796039_38796730	692	-	1_38796039_38796730	0	61	-8.68007	1.9438e-12	1.10472e-11	Down	3' UTR	ENSMUSG00000048814	ENSMUST00000039612	Lonrf2	LON peptidase N-terminal domain and ring finger 2	2900060P06Rik|AI851349
1_38869069_38869382	314	-	1_38869069_38869382	0	29	-7.61119	2.75402e-06	4.40215e-06	Down	Intron (ENSMUST00000027249/ENSMUSG00000026080, intron 2 of 6)	ENSMUSG00000026080	ENSMUST00000192948	Chst10	carbohydrate sulfotransferase 10	AI507003|AU041319|Hnk-1st|ST
1_38987664_38988761	1098	1_38987793_38988080	1_38987664_38988761	38	161	-1.51754	2.52889e-06	4.1035e-06	Down	Promoter (<=1kb)	ENSMUSG00000026078	ENSMUST00000193489	Pdcl3	phosducin-like 3	1110061A19Rik|C80025|Viaf1
1_39122816_39123309	494	1_39122816_39123309	1_39122931_39123300	37	25	1.1239	0.0113003	0.0146465	Up	Distal Intergenic	ENSMUSG00000103182	ENSMUST00000195455	Gm37091	-	-
1_39367336_39370977	3642	1_39367915_39368682;1_39369397_39369678	1_39367336_39370977	171	700	-1.46986	7.92092e-10	2.29095e-09	Down	Promoter (<=1kb)	ENSMUSG00000073702	ENSMUST00000086535	Rpl31	ribosomal protein L31	Dts
1_39535736_39536108	373	-	1_39535736_39536108	0	56	-8.557	1.41877e-11	6.40067e-11	Down	Promoter (<=1kb)	ENSMUSG00000003135	ENSMUST00000003219	Cnot11	CCR4-NOT transcription complex, subunit 11	2410015L18Rik|C40|D1Bwg0212e
1_39568379_39568626	248	1_39568379_39568626	-	32	0	8.31331	4.26767e-10	1.30949e-09	Up	Intron (ENSMUST00000062525/ENSMUSG00000048234, intron 6 of 6)	ENSMUSG00000048234	ENSMUST00000083002	Rnf149	ring finger protein 149	1600023E10Rik|AV037261|C76763|Gm15832|Greul4
1_39569328_39569566	239	1_39569328_39569566	-	24	0	7.89978	7.04324e-08	1.37487e-07	Up	Intron (ENSMUST00000062525/ENSMUSG00000048234, intron 6 of 6)	ENSMUSG00000048234	ENSMUST00000083002	Rnf149	ring finger protein 149	1600023E10Rik|AV037261|C76763|Gm15832|Greul4
1_39576514_39576874	361	-	1_39576514_39576874	0	57	-8.58247	8.60156e-12	4.14024e-11	Down	Exon (ENSMUST00000062525/ENSMUSG00000048234, exon 1 of 7)	ENSMUSG00000048234	ENSMUST00000195705	Rnf149	ring finger protein 149	1600023E10Rik|AV037261|C76763|Gm15832|Greul4
1_39577567_39578201	635	-	1_39577567_39578201	0	85	-9.15773	1.59569e-16	2.45583e-15	Down	Promoter (<=1kb)	ENSMUSG00000048234	ENSMUST00000062525	Rnf149	ring finger protein 149	1600023E10Rik|AV037261|C76763|Gm15832|Greul4
1_39610247_39610530	284	1_39610247_39610530	-	30	0	8.2205	1.29729e-09	3.54454e-09	Up	Distal Intergenic	ENSMUSG00000102471	ENSMUST00000195631	Gm5100	-	-
1_39699601_39699840	240	1_39699601_39699840	-	31	0	8.26765	7.42892e-10	2.14936e-09	Up	Intron (ENSMUST00000151913/ENSMUSG00000057173, intron 11 of 14)	ENSMUSG00000057173	ENSMUST00000126760	Rfx8	regulatory factor X 8	4933400N17Rik
1_39701003_39701388	386	-	1_39701003_39701388	0	39	-8.03672	3.4461e-08	7.26383e-08	Down	Intron (ENSMUST00000151913/ENSMUSG00000057173, intron 11 of 14)	ENSMUSG00000057173	ENSMUST00000126760	Rfx8	regulatory factor X 8	4933400N17Rik
1_39761292_39761530	239	1_39761292_39761530	-	29	0	8.17176	3.99443e-09	1.00658e-08	Up	Distal Intergenic	ENSMUSG00000057173	ENSMUST00000151913	Rfx8	regulatory factor X 8	4933400N17Rik
1_39775176_39775542	367	-	1_39775176_39775542	0	21	-7.14833	1.54285e-05	2.29874e-05	Down	Distal Intergenic	ENSMUSG00000091937	ENSMUST00000171319	Gm3646	predicted gene 3646	-
1_39831773_39832011	239	1_39831773_39832011	-	23	0	7.83864	2.27396e-07	4.21299e-07	Up	Distal Intergenic	ENSMUSG00000101634	ENSMUST00000187091	1700066B17Rik	RIKEN cDNA 1700066B17 gene	-
1_39852288_39852814	527	-	1_39852288_39852814	0	32	-7.75251	9.08175e-07	1.53104e-06	Down	Distal Intergenic	ENSMUSG00000101634	ENSMUST00000186683	1700066B17Rik	RIKEN cDNA 1700066B17 gene	-
1_39853533_39854890	1358	1_39854519_39854765	1_39853533_39854890	27	204	-2.35025	2.51485e-12	1.40646e-11	Down	Distal Intergenic	ENSMUSG00000101634	ENSMUST00000186683	1700066B17Rik	RIKEN cDNA 1700066B17 gene	-
1_39855899_39856180	282	1_39855899_39856180	-	26	0	8.01479	2.21221e-08	4.74092e-08	Up	Distal Intergenic	ENSMUSG00000101634	ENSMUST00000186683	1700066B17Rik	RIKEN cDNA 1700066B17 gene	-
1_39856464_39856790	327	-	1_39856464_39856790	0	31	-7.70693	9.08175e-07	1.53104e-06	Down	Distal Intergenic	ENSMUSG00000101634	ENSMUST00000186683	1700066B17Rik	RIKEN cDNA 1700066B17 gene	-
1_39866163_39866749	587	-	1_39866163_39866749	0	42	-8.14324	6.93678e-09	1.66011e-08	Down	Distal Intergenic	ENSMUSG00000101634	ENSMUST00000186683	1700066B17Rik	RIKEN cDNA 1700066B17 gene	-
1_39867101_39867469	369	1_39867101_39867469	-	42	0	8.70454	1.17118e-12	7.07889e-12	Up	Distal Intergenic	ENSMUSG00000101634	ENSMUST00000186683	1700066B17Rik	RIKEN cDNA 1700066B17 gene	-
1_39868004_39868899	896	-	1_39868004_39868899	0	96	-9.33301	3.00402e-17	5.62136e-16	Down	Distal Intergenic	ENSMUSG00000101634	ENSMUST00000186683	1700066B17Rik	RIKEN cDNA 1700066B17 gene	-
1_39869150_39869552	403	-	1_39869150_39869552	0	52	-8.45038	1.07531e-10	3.97431e-10	Down	Distal Intergenic	ENSMUSG00000101634	ENSMUST00000186683	1700066B17Rik	RIKEN cDNA 1700066B17 gene	-
1_39883856_39884166	311	1_39883856_39884166	-	36	0	8.48273	4.79413e-11	1.90587e-10	Up	Distal Intergenic	ENSMUSG00000026074	ENSMUST00000163854	Map4k4	mitogen-activated protein kinase kinase kinase kinase 4	9430080K19Rik|AU043147|AU045934|AW046177|HGK|Nik
1_39884847_39885171	325	1_39884847_39885171	-	33	0	8.35756	2.45934e-10	8.02848e-10	Up	Distal Intergenic	ENSMUSG00000026074	ENSMUST00000163854	Map4k4	mitogen-activated protein kinase kinase kinase kinase 4	9430080K19Rik|AU043147|AU045934|AW046177|HGK|Nik
1_39899669_39900776	1108	-	1_39899669_39900776	0	166	-10.1221	8.61153e-27	1.20574e-24	Down	Promoter (<=1kb)	ENSMUSG00000026074	ENSMUST00000163854	Map4k4	mitogen-activated protein kinase kinase kinase kinase 4	9430080K19Rik|AU043147|AU045934|AW046177|HGK|Nik
1_39906960_39907466	507	-	1_39906960_39907466	0	47	-8.30497	8.46962e-10	2.41856e-09	Down	Intron (ENSMUST00000163854/ENSMUSG00000026074, intron 2 of 30)	ENSMUSG00000026074	ENSMUST00000192509	Map4k4	mitogen-activated protein kinase kinase kinase kinase 4	9430080K19Rik|AU043147|AU045934|AW046177|HGK|Nik
1_39909319_39909563	245	1_39909319_39909563	-	25	0	7.95843	3.94049e-08	8.10452e-08	Up	Intron (ENSMUST00000163854/ENSMUSG00000026074, intron 2 of 30)	ENSMUSG00000026074	ENSMUST00000192509	Map4k4	mitogen-activated protein kinase kinase kinase kinase 4	9430080K19Rik|AU043147|AU045934|AW046177|HGK|Nik
1_39915318_39915630	313	-	1_39915318_39915630	0	24	-7.33971	2.47519e-06	4.01712e-06	Down	Intron (ENSMUST00000163854/ENSMUSG00000026074, intron 2 of 30)	ENSMUSG00000026074	ENSMUST00000192509	Map4k4	mitogen-activated protein kinase kinase kinase kinase 4	9430080K19Rik|AU043147|AU045934|AW046177|HGK|Nik
1_39915832_39916218	387	1_39915832_39916218	-	30	0	8.2205	1.29729e-09	3.54454e-09	Up	Intron (ENSMUST00000163854/ENSMUSG00000026074, intron 2 of 30)	ENSMUSG00000026074	ENSMUST00000192509	Map4k4	mitogen-activated protein kinase kinase kinase kinase 4	9430080K19Rik|AU043147|AU045934|AW046177|HGK|Nik
1_39918030_39918285	256	1_39918030_39918285	-	34	0	8.4005	1.42164e-10	4.99774e-10	Up	Intron (ENSMUST00000163854/ENSMUSG00000026074, intron 2 of 30)	ENSMUSG00000026074	ENSMUST00000192509	Map4k4	mitogen-activated protein kinase kinase kinase kinase 4	9430080K19Rik|AU043147|AU045934|AW046177|HGK|Nik
1_39918443_39918890	448	-	1_39918443_39918890	0	43	-8.17707	4.08541e-09	1.01592e-08	Down	Intron (ENSMUST00000163854/ENSMUSG00000026074, intron 2 of 30)	ENSMUSG00000026074	ENSMUST00000192509	Map4k4	mitogen-activated protein kinase kinase kinase kinase 4	9430080K19Rik|AU043147|AU045934|AW046177|HGK|Nik
1_39919574_39919958	385	-	1_39919574_39919958	0	23	-7.27869	4.53786e-06	7.16963e-06	Down	Intron (ENSMUST00000163854/ENSMUSG00000026074, intron 2 of 30)	ENSMUSG00000026074	ENSMUST00000192509	Map4k4	mitogen-activated protein kinase kinase kinase kinase 4	9430080K19Rik|AU043147|AU045934|AW046177|HGK|Nik
1_39928594_39929294	701	1_39928594_39929294	-	65	0	9.33337	2.32769e-18	5.94095e-17	Up	Intron (ENSMUST00000163854/ENSMUSG00000026074, intron 2 of 30)	ENSMUSG00000026074	ENSMUST00000192509	Map4k4	mitogen-activated protein kinase kinase kinase kinase 4	9430080K19Rik|AU043147|AU045934|AW046177|HGK|Nik
1_39930986_39932157	1172	1_39930986_39932157	-	90	0	9.80223	9.72623e-24	7.81344e-22	Up	Intron (ENSMUST00000163854/ENSMUSG00000026074, intron 2 of 30)	ENSMUSG00000026074	ENSMUST00000192509	Map4k4	mitogen-activated protein kinase kinase kinase kinase 4	9430080K19Rik|AU043147|AU045934|AW046177|HGK|Nik
1_39934379_39934667	289	1_39934379_39934667	-	33	0	8.35756	2.45934e-10	8.02848e-10	Up	Intron (ENSMUST00000163854/ENSMUSG00000026074, intron 2 of 30)	ENSMUSG00000026074	ENSMUST00000193514	Map4k4	mitogen-activated protein kinase kinase kinase kinase 4	9430080K19Rik|AU043147|AU045934|AW046177|HGK|Nik
1_39937281_39940509	3229	1_39937321_39939223;1_39939463_39940327	1_39937281_39938304;1_39938739_39939666;1_39940141_39940509	282	203	1.03663	2.5042e-05	3.71107e-05	Up	Intron (ENSMUST00000163854/ENSMUSG00000026074, intron 2 of 30)	ENSMUSG00000026074	ENSMUST00000193514	Map4k4	mitogen-activated protein kinase kinase kinase kinase 4	9430080K19Rik|AU043147|AU045934|AW046177|HGK|Nik
1_39940948_39943330	2383	1_39940948_39941404;1_39941589_39942059;1_39942296_39943330	1_39941291_39943163	220	152	1.09563	1.94692e-05	2.89287e-05	Up	Intron (ENSMUST00000163854/ENSMUSG00000026074, intron 2 of 30)	ENSMUSG00000026074	ENSMUST00000193514	Map4k4	mitogen-activated protein kinase kinase kinase kinase 4	9430080K19Rik|AU043147|AU045934|AW046177|HGK|Nik
1_39943737_39944477	741	1_39943737_39944461	1_39943866_39944477	74	52	1.0698	0.00182655	0.0024898	Up	Intron (ENSMUST00000163854/ENSMUSG00000026074, intron 2 of 30)	ENSMUSG00000026074	ENSMUST00000193514	Map4k4	mitogen-activated protein kinase kinase kinase kinase 4	9430080K19Rik|AU043147|AU045934|AW046177|HGK|Nik
1_39945712_39946022	311	-	1_39945712_39946022	0	33	-7.79671	5.23325e-07	9.17763e-07	Down	Intron (ENSMUST00000163854/ENSMUSG00000026074, intron 2 of 30)	ENSMUSG00000026074	ENSMUST00000193514	Map4k4	mitogen-activated protein kinase kinase kinase kinase 4	9430080K19Rik|AU043147|AU045934|AW046177|HGK|Nik
1_39946139_39947021	883	1_39946139_39947021	-	74	0	9.52018	1.76288e-20	6.96056e-19	Up	Intron (ENSMUST00000163854/ENSMUSG00000026074, intron 2 of 30)	ENSMUSG00000026074	ENSMUST00000193514	Map4k4	mitogen-activated protein kinase kinase kinase kinase 4	9430080K19Rik|AU043147|AU045934|AW046177|HGK|Nik
1_39948242_39948665	424	1_39948242_39948665	-	38	0	8.56052	9.60067e-12	4.38615e-11	Up	Intron (ENSMUST00000163854/ENSMUSG00000026074, intron 2 of 30)	ENSMUSG00000026074	ENSMUST00000193514	Map4k4	mitogen-activated protein kinase kinase kinase kinase 4	9430080K19Rik|AU043147|AU045934|AW046177|HGK|Nik
1_39949457_39949944	488	1_39949457_39949944	-	39	0	8.59789	5.64977e-12	2.78967e-11	Up	Intron (ENSMUST00000163854/ENSMUSG00000026074, intron 2 of 30)	ENSMUSG00000026074	ENSMUST00000193514	Map4k4	mitogen-activated protein kinase kinase kinase kinase 4	9430080K19Rik|AU043147|AU045934|AW046177|HGK|Nik
1_39956756_39957032	277	1_39956756_39957032	-	30	0	8.2205	1.29729e-09	3.54454e-09	Up	Intron (ENSMUST00000163854/ENSMUSG00000026074, intron 2 of 30)	ENSMUSG00000026074	ENSMUST00000193514	Map4k4	mitogen-activated protein kinase kinase kinase kinase 4	9430080K19Rik|AU043147|AU045934|AW046177|HGK|Nik
1_39960453_39961337	885	1_39960526_39961337	1_39960453_39960805	82	28	2.10727	6.85723e-09	1.66011e-08	Up	Intron (ENSMUST00000163854/ENSMUSG00000026074, intron 2 of 30)	ENSMUSG00000026074	ENSMUST00000193514	Map4k4	mitogen-activated protein kinase kinase kinase kinase 4	9430080K19Rik|AU043147|AU045934|AW046177|HGK|Nik
1_39961975_39962310	336	-	1_39961975_39962310	0	32	-7.75251	9.08175e-07	1.53104e-06	Down	Promoter (1-2kb)	ENSMUSG00000026074	ENSMUST00000193514	Map4k4	mitogen-activated protein kinase kinase kinase kinase 4	9430080K19Rik|AU043147|AU045934|AW046177|HGK|Nik
1_39962776_39963062	287	1_39962776_39963062	-	38	0	8.56052	9.60067e-12	4.38615e-11	Up	Promoter (1-2kb)	ENSMUSG00000026074	ENSMUST00000193514	Map4k4	mitogen-activated protein kinase kinase kinase kinase 4	9430080K19Rik|AU043147|AU045934|AW046177|HGK|Nik
1_39964118_39964510	393	1_39964118_39964510	-	42	0	8.70454	1.17118e-12	7.07889e-12	Up	Promoter (<=1kb)	ENSMUSG00000026074	ENSMUST00000193514	Map4k4	mitogen-activated protein kinase kinase kinase kinase 4	9430080K19Rik|AU043147|AU045934|AW046177|HGK|Nik
1_39967812_39968217	406	1_39967812_39968217	-	27	0	8.06903	1.24618e-08	2.79243e-08	Up	Intron (ENSMUST00000163854/ENSMUSG00000026074, intron 3 of 30)	ENSMUSG00000026074	ENSMUST00000194163	Map4k4	mitogen-activated protein kinase kinase kinase kinase 4	9430080K19Rik|AU043147|AU045934|AW046177|HGK|Nik
1_39968820_39969218	399	-	1_39968820_39969218	0	35	-7.88122	1.75007e-07	3.29918e-07	Down	Intron (ENSMUST00000163854/ENSMUSG00000026074, intron 3 of 30)	ENSMUSG00000026074	ENSMUST00000194163	Map4k4	mitogen-activated protein kinase kinase kinase kinase 4	9430080K19Rik|AU043147|AU045934|AW046177|HGK|Nik
1_39969642_39970022	381	1_39969642_39970022	-	42	0	8.70454	1.17118e-12	7.07889e-12	Up	Intron (ENSMUST00000163854/ENSMUSG00000026074, intron 3 of 30)	ENSMUSG00000026074	ENSMUST00000194163	Map4k4	mitogen-activated protein kinase kinase kinase kinase 4	9430080K19Rik|AU043147|AU045934|AW046177|HGK|Nik
1_39976137_39976523	387	1_39976137_39976523	-	40	0	8.63433	3.33429e-12	1.75371e-11	Up	Intron (ENSMUST00000163854/ENSMUSG00000026074, intron 4 of 30)	ENSMUSG00000026074	ENSMUST00000194163	Map4k4	mitogen-activated protein kinase kinase kinase kinase 4	9430080K19Rik|AU043147|AU045934|AW046177|HGK|Nik
1_39978722_39978960	239	1_39978722_39978960	-	37	0	8.52215	1.63617e-11	7.0045e-11	Up	Intron (ENSMUST00000163854/ENSMUSG00000026074, intron 5 of 30)	ENSMUSG00000026074	ENSMUST00000194163	Map4k4	mitogen-activated protein kinase kinase kinase kinase 4	9430080K19Rik|AU043147|AU045934|AW046177|HGK|Nik
1_39988102_39988442	341	-	1_39988102_39988442	0	25	-7.39824	2.59951e-05	3.8153e-05	Down	Intron (ENSMUST00000163854/ENSMUSG00000026074, intron 10 of 30)	ENSMUSG00000026074	ENSMUST00000195356	Map4k4	mitogen-activated protein kinase kinase kinase kinase 4	9430080K19Rik|AU043147|AU045934|AW046177|HGK|Nik
1_39995924_39996306	383	1_39995924_39996306	-	37	0	8.52215	1.63617e-11	7.0045e-11	Up	Intron (ENSMUST00000163854/ENSMUSG00000026074, intron 12 of 30)	ENSMUSG00000026074	ENSMUST00000195356	Map4k4	mitogen-activated protein kinase kinase kinase kinase 4	9430080K19Rik|AU043147|AU045934|AW046177|HGK|Nik
1_40029325_40029580	256	1_40029325_40029580	-	32	0	8.31331	4.26767e-10	1.30949e-09	Up	Distal Intergenic	ENSMUSG00000026074	ENSMUST00000191657	Map4k4	mitogen-activated protein kinase kinase kinase kinase 4	9430080K19Rik|AU043147|AU045934|AW046177|HGK|Nik
1_40662064_40662326	263	1_40662064_40662326	-	35	0	8.4422	8.24314e-11	3.08621e-10	Up	Distal Intergenic	ENSMUSG00000026062	ENSMUST00000027231	Slc9a2	solute carrier family 9 (sodium/hydrogen exchanger), member 2	2210416H12Rik|4932415O19Rik|AV333884|NHE2
1_40666172_40667521	1350	1_40666172_40667521	1_40666208_40666973	146	104	1.05127	0.000170173	0.000242445	Up	Distal Intergenic	ENSMUSG00000026062	ENSMUST00000027231	Slc9a2	solute carrier family 9 (sodium/hydrogen exchanger), member 2	2210416H12Rik|4932415O19Rik|AV333884|NHE2
1_40670136_40670374	239	1_40670136_40670374	-	22	0	7.7748	4.1078e-07	7.32295e-07	Up	Distal Intergenic	ENSMUSG00000026062	ENSMUST00000027231	Slc9a2	solute carrier family 9 (sodium/hydrogen exchanger), member 2	2210416H12Rik|4932415O19Rik|AV333884|NHE2
1_40887922_40888258	337	-	1_40887922_40888258	0	32	-7.75251	9.08175e-07	1.53104e-06	Down	Distal Intergenic	ENSMUSG00000094136	ENSMUST00000178542	Gm5973	-	-
1_40922213_40922580	368	1_40922213_40922580	-	28	0	8.12131	7.04361e-09	1.66011e-08	Up	Distal Intergenic	ENSMUSG00000094136	ENSMUST00000178542	Gm5973	-	-
1_40924526_40924809	284	1_40924526_40924809	-	32	0	8.31331	4.26767e-10	1.30949e-09	Up	Distal Intergenic	ENSMUSG00000094136	ENSMUST00000178542	Gm5973	-	-
1_40926411_40926692	282	1_40926411_40926692	-	34	0	8.4005	1.42164e-10	4.99774e-10	Up	Distal Intergenic	ENSMUSG00000094136	ENSMUST00000178542	Gm5973	-	-
1_40928786_40929291	506	1_40928786_40929291	-	43	0	8.73841	4.15962e-13	2.73662e-12	Up	Distal Intergenic	ENSMUSG00000094136	ENSMUST00000178542	Gm5973	-	-
1_40941002_40941619	618	1_40941002_40941619	-	54	0	9.06635	1.04021e-15	1.33762e-14	Up	Distal Intergenic	ENSMUSG00000094136	ENSMUST00000178542	Gm5973	-	-
1_40966713_40967367	655	1_40966713_40967097	1_40966971_40967367	36	24	1.14302	0.00971496	0.0126492	Up	Distal Intergenic	ENSMUSG00000094136	ENSMUST00000178542	Gm5973	-	-
1_42889462_42889974	513	-	1_42889462_42889974	0	43	-8.17707	4.08541e-09	1.01592e-08	Down	Intron (ENSMUST00000057208/ENSMUSG00000060679, intron 5 of 10)	ENSMUSG00000060679	ENSMUST00000201108	Mrps9	mitochondrial ribosomal protein S9	2310002A08Rik|AW322516|Mrp-S9|S9mt|mg637
1_43095512_43095881	370	-	1_43095512_43095881	0	32	-7.75251	9.08175e-07	1.53104e-06	Down	5' UTR	ENSMUSG00000070939	ENSMUST00000189010	Tgfbrap1	transforming growth factor, beta receptor associated protein 1	3110018K12Rik|AU024090|AU042859|AW742551|Trap1
1_43163548_43163880	333	-	1_43163548_43163880	0	33	-7.79671	5.23325e-07	9.17763e-07	Down	Promoter (<=1kb)	ENSMUSG00000008136	ENSMUST00000008280	Fhl2	four and a half LIM domains 2	FHL-2|SLIM-3|SLIM3
1_43171038_43171401	364	-	1_43171038_43171401	0	34	-7.83958	3.02271e-07	5.50653e-07	Down	Intron (ENSMUST00000185893/ENSMUSG00000008136, intron 5 of 5)	ENSMUSG00000008136	ENSMUST00000008280	Fhl2	four and a half LIM domains 2	FHL-2|SLIM-3|SLIM3
1_43175517_43175883	367	-	1_43175517_43175883	0	31	-7.70693	9.08175e-07	1.53104e-06	Down	Intron (ENSMUST00000185893/ENSMUSG00000008136, intron 5 of 5)	ENSMUSG00000008136	ENSMUST00000008280	Fhl2	four and a half LIM domains 2	FHL-2|SLIM-3|SLIM3
1_43182852_43183208	357	-	1_43182852_43183208	0	34	-7.83958	3.02271e-07	5.50653e-07	Down	Intron (ENSMUST00000185893/ENSMUSG00000008136, intron 5 of 5)	ENSMUSG00000008136	ENSMUST00000178557	Fhl2	four and a half LIM domains 2	FHL-2|SLIM-3|SLIM3
1_43446567_43446886	320	-	1_43446567_43446886	0	27	-7.50864	8.426e-06	1.282e-05	Down	Intron (ENSMUST00000187435/ENSMUSG00000066877, intron 1 of 2)	ENSMUSG00000066877	ENSMUST00000136648	Nck2	non-catalytic region of tyrosine kinase adaptor protein 2	4833426I10Rik|Grb4|NCKbeta|Nck-2
1_43567475_43567992	518	-	1_43567475_43567992	0	33	-7.79671	5.23325e-07	9.17763e-07	Down	Intron (ENSMUST00000086421/ENSMUSG00000066877, intron 4 of 4)	ENSMUSG00000066877	ENSMUST00000193169	Nck2	non-catalytic region of tyrosine kinase adaptor protein 2	4833426I10Rik|Grb4|NCKbeta|Nck-2
1_43574496_43575141	646	-	1_43574496_43575141	0	39	-8.03672	3.4461e-08	7.26383e-08	Down	Distal Intergenic	ENSMUSG00000103945	ENSMUST00000193169	Gm38228	-	-
1_43754327_43754670	344	-	1_43754327_43754670	0	26	-7.4545	1.47851e-05	2.21227e-05	Down	Intron (ENSMUST00000126008/ENSMUSG00000057363, intron 2 of 14)	ENSMUSG00000057363	ENSMUST00000187764	Uxs1	UDP-glucuronate decarboxylase 1	1600025I13Rik|AI451869|AI649125|AW550562
1_43799312_43799585	274	1_43799312_43799585	-	22	0	7.7748	4.1078e-07	7.32295e-07	Up	Intron (ENSMUST00000126008/ENSMUSG00000057363, intron 11 of 14)	ENSMUSG00000057363	ENSMUST00000163003	Uxs1	UDP-glucuronate decarboxylase 1	1600025I13Rik|AI451869|AI649125|AW550562
1_43818872_43819628	757	1_43818872_43819628	-	73	0	9.50058	2.72097e-20	1.02563e-18	Up	Intron (ENSMUST00000126008/ENSMUSG00000057363, intron 14 of 14)	ENSMUSG00000057363	ENSMUST00000136179	Uxs1	UDP-glucuronate decarboxylase 1	1600025I13Rik|AI451869|AI649125|AW550562
1_43819875_43821501	1627	1_43819875_43821339	1_43820226_43820774;1_43820959_43821501	195	102	1.4965	3.76932e-08	7.94129e-08	Up	Intron (ENSMUST00000126008/ENSMUSG00000057363, intron 14 of 14)	ENSMUSG00000057363	ENSMUST00000136179	Uxs1	UDP-glucuronate decarboxylase 1	1600025I13Rik|AI451869|AI649125|AW550562
1_43821660_43821980	321	1_43821660_43821980	-	43	0	8.73841	4.15962e-13	2.73662e-12	Up	Intron (ENSMUST00000126008/ENSMUSG00000057363, intron 14 of 14)	ENSMUSG00000057363	ENSMUST00000136179	Uxs1	UDP-glucuronate decarboxylase 1	1600025I13Rik|AI451869|AI649125|AW550562
1_43828000_43829165	1166	1_43828108_43828651	1_43828000_43829165	45	136	-1.031	0.00129586	0.00178018	Down	Promoter (1-2kb)	ENSMUSG00000057363	ENSMUST00000126008	Uxs1	UDP-glucuronate decarboxylase 1	1600025I13Rik|AI451869|AI649125|AW550562
1_43830048_43830452	405	1_43830048_43830452	-	38	0	8.56052	9.60067e-12	4.38615e-11	Up	Distal Intergenic	ENSMUSG00000057363	ENSMUST00000126008	Uxs1	UDP-glucuronate decarboxylase 1	1600025I13Rik|AI451869|AI649125|AW550562
1_43899146_43899678	533	-	1_43899146_43899678	0	58	-8.60749	8.60156e-12	4.14024e-11	Down	Downstream (<1kb)	ENSMUSG00000101395	ENSMUST00000189286	Gm8241	-	-
1_43932264_43935400	3137	1_43932783_43933859;1_43934034_43934719	1_43932264_43935400	259	815	-1.09059	2.20373e-06	3.61713e-06	Down	Promoter (<=1kb)	ENSMUSG00000041763	ENSMUST00000185579	Tpp2	tripeptidyl peptidase II	TPP-2|TppII
1_44108532_44108959	428	-	1_44108532_44108959	0	33	-7.79671	5.23325e-07	9.17763e-07	Down	Intron (ENSMUST00000148542/ENSMUSG00000101104, intron 5 of 5)	ENSMUSG00000101104	ENSMUST00000148542	Gm29247	-	-
1_44147160_44148374	1215	1_44147347_44147739	1_44147160_44148374	35	196	-1.91941	1.90199e-09	5.12791e-09	Down	Promoter (<=1kb)	ENSMUSG00000026048	ENSMUST00000188376	Ercc5	excision repair cross-complementing rodent repair deficiency, complementation group 5	Xpg
1_44330683_44331788	1106	-	1_44330683_44331788	0	123	-9.69007	4.10504e-21	1.94461e-19	Down	Promoter (<=1kb)	ENSMUSG00000100966	ENSMUST00000191483	Gm5700	-	-
1_44332168_44333262	1095	-	1_44332168_44333262	0	78	-9.03397	2.455e-15	2.95618e-14	Down	Distal Intergenic	ENSMUSG00000100966	ENSMUST00000191483	Gm5700	-	-
1_44390879_44391237	359	-	1_44390879_44391237	0	38	-7.99939	5.909e-08	1.17873e-07	Down	Promoter (1-2kb)	ENSMUSG00000100769	ENSMUST00000190951	Gm28893	-	-
1_44397972_44398297	326	-	1_44397972_44398297	0	29	-7.61119	2.75402e-06	4.40215e-06	Down	Distal Intergenic	ENSMUSG00000100769	ENSMUST00000190951	Gm28893	-	-
1_44551647_44553277	1631	1_44552378_44552701;1_44552899_44553202	1_44551647_44553277	65	209	-1.12083	9.77812e-05	0.000140628	Down	Promoter (<=1kb)	ENSMUSG00000056870	ENSMUST00000160854	Gulp1	GULP, engulfment adaptor PTB domain containing 1	3110030A04Rik|5730529O06Rik|CED-6|Ced6|GULP|Gulp-2
1_44553626_44553978	353	-	1_44553626_44553978	0	29	-7.61119	2.75402e-06	4.40215e-06	Down	Intron (ENSMUST00000074525/ENSMUSG00000056870, intron 1 of 10)	ENSMUSG00000056870	ENSMUST00000161066	Gulp1	GULP, engulfment adaptor PTB domain containing 1	3110030A04Rik|5730529O06Rik|CED-6|Ced6|GULP|Gulp-2
1_44585091_44585412	322	-	1_44585091_44585412	0	32	-7.75251	9.08175e-07	1.53104e-06	Down	Intron (ENSMUST00000074525/ENSMUSG00000056870, intron 1 of 10)	ENSMUSG00000056870	ENSMUST00000194332	Gulp1	GULP, engulfment adaptor PTB domain containing 1	3110030A04Rik|5730529O06Rik|CED-6|Ced6|GULP|Gulp-2
1_44591259_44591658	400	1_44591259_44591658	-	40	0	8.63433	3.33429e-12	1.75371e-11	Up	Intron (ENSMUST00000074525/ENSMUSG00000056870, intron 1 of 10)	ENSMUSG00000056870	ENSMUST00000194332	Gulp1	GULP, engulfment adaptor PTB domain containing 1	3110030A04Rik|5730529O06Rik|CED-6|Ced6|GULP|Gulp-2
1_44591975_44592426	452	-	1_44591975_44592426	0	46	-8.27404	1.42755e-09	3.85364e-09	Down	Intron (ENSMUST00000074525/ENSMUSG00000056870, intron 1 of 10)	ENSMUSG00000056870	ENSMUST00000194332	Gulp1	GULP, engulfment adaptor PTB domain containing 1	3110030A04Rik|5730529O06Rik|CED-6|Ced6|GULP|Gulp-2
1_44610395_44610743	349	-	1_44610395_44610743	0	34	-7.83958	3.02271e-07	5.50653e-07	Down	Intron (ENSMUST00000074525/ENSMUSG00000056870, intron 1 of 10)	ENSMUSG00000056870	ENSMUST00000160955	Gulp1	GULP, engulfment adaptor PTB domain containing 1	3110030A04Rik|5730529O06Rik|CED-6|Ced6|GULP|Gulp-2
1_44611915_44615742	3828	1_44612123_44613113;1_44613654_44614164	1_44611915_44615742	128	577	-1.60871	8.70183e-11	3.25733e-10	Down	Intron (ENSMUST00000074525/ENSMUSG00000056870, intron 1 of 10)	ENSMUSG00000056870	ENSMUST00000160955	Gulp1	GULP, engulfment adaptor PTB domain containing 1	3110030A04Rik|5730529O06Rik|CED-6|Ced6|GULP|Gulp-2
1_44616040_44616482	443	1_44616040_44616482	-	41	0	8.66986	1.97336e-12	1.10472e-11	Up	Intron (ENSMUST00000074525/ENSMUSG00000056870, intron 1 of 10)	ENSMUSG00000056870	ENSMUST00000160955	Gulp1	GULP, engulfment adaptor PTB domain containing 1	3110030A04Rik|5730529O06Rik|CED-6|Ced6|GULP|Gulp-2
1_44617055_44617365	311	-	1_44617055_44617365	0	21	-7.14833	1.54285e-05	2.29874e-05	Down	Intron (ENSMUST00000074525/ENSMUSG00000056870, intron 1 of 10)	ENSMUSG00000056870	ENSMUST00000160955	Gulp1	GULP, engulfment adaptor PTB domain containing 1	3110030A04Rik|5730529O06Rik|CED-6|Ced6|GULP|Gulp-2
1_44618106_44618344	239	1_44618106_44618344	-	20	0	7.63795	7.44748e-07	1.2962e-06	Up	Intron (ENSMUST00000074525/ENSMUSG00000056870, intron 1 of 10)	ENSMUSG00000056870	ENSMUST00000160955	Gulp1	GULP, engulfment adaptor PTB domain containing 1	3110030A04Rik|5730529O06Rik|CED-6|Ced6|GULP|Gulp-2
1_44746250_44746729	480	-	1_44746250_44746729	0	45	-8.24243	2.41201e-09	6.33597e-09	Down	Promoter (1-2kb)	ENSMUSG00000101701	ENSMUST00000186732	4930521E06Rik	RIKEN cDNA 4930521E06 gene	-
1_44884692_44884946	255	1_44884692_44884946	-	21	0	7.708	4.1078e-07	7.32295e-07	Up	Distal Intergenic	ENSMUSG00000100013	ENSMUST00000185547	Gm19480	-	-
1_44890143_44890724	582	-	1_44890143_44890724	0	46	-8.27404	1.42755e-09	3.85364e-09	Down	Distal Intergenic	ENSMUSG00000100013	ENSMUST00000185547	Gm19480	-	-
1_44891043_44891508	466	-	1_44891043_44891508	0	34	-7.83958	3.02271e-07	5.50653e-07	Down	Distal Intergenic	ENSMUSG00000100013	ENSMUST00000185547	Gm19480	-	-
1_44893657_44893983	327	-	1_44893657_44893983	0	25	-7.39824	2.59951e-05	3.8153e-05	Down	Distal Intergenic	ENSMUSG00000100013	ENSMUST00000185547	Gm19480	-	-
1_44988557_44988899	343	1_44988557_44988899	-	36	0	8.48273	4.79413e-11	1.90587e-10	Up	Distal Intergenic	ENSMUSG00000101251	ENSMUST00000188283	Gm3496	-	-
1_45002973_45003382	410	-	1_45002973_45003382	0	42	-8.14324	6.93678e-09	1.66011e-08	Down	Distal Intergenic	ENSMUSG00000101251	ENSMUST00000188283	Gm3496	-	-
1_45030465_45030753	289	1_45030465_45030753	-	21	0	7.708	4.1078e-07	7.32295e-07	Up	Distal Intergenic	ENSMUSG00000101251	ENSMUST00000188283	Gm3496	-	-
1_45313648_45314014	367	1_45313648_45314014	-	59	0	9.19387	5.93548e-17	1.01453e-15	Up	Intron (ENSMUST00000129611/ENSMUSG00000026043, intron 1 of 3)	ENSMUSG00000026043	ENSMUST00000198698	Col3a1	collagen, type III, alpha 1	AW550625|Col3a-1|Tsk-2|Tsk2
1_45315833_45316071	239	1_45315833_45316071	-	20	0	7.63795	7.44748e-07	1.2962e-06	Up	Exon (ENSMUST00000189818/ENSMUSG00000026043, exon 2 of 2)	ENSMUSG00000026043	ENSMUST00000198698	Col3a1	collagen, type III, alpha 1	AW550625|Col3a-1|Tsk-2|Tsk2
1_45354120_45354590	471	-	1_45354120_45354590	0	23	-7.27869	4.53786e-06	7.16963e-06	Down	Distal Intergenic	ENSMUSG00000026043	ENSMUST00000186021	Col3a1	collagen, type III, alpha 1	AW550625|Col3a-1|Tsk-2|Tsk2
1_45355438_45356594	1157	1_45355438_45356594	1_45355942_45356527	88	56	1.21285	0.000202439	0.000287583	Up	Distal Intergenic	ENSMUSG00000026043	ENSMUST00000186021	Col3a1	collagen, type III, alpha 1	AW550625|Col3a-1|Tsk-2|Tsk2
1_45362301_45362685	385	1_45362301_45362685	-	44	0	8.7715	2.48909e-13	1.74548e-12	Up	Distal Intergenic	ENSMUSG00000026043	ENSMUST00000186021	Col3a1	collagen, type III, alpha 1	AW550625|Col3a-1|Tsk-2|Tsk2
1_45363728_45364090	363	-	1_45363728_45364090	0	27	-7.50864	8.426e-06	1.282e-05	Down	Distal Intergenic	ENSMUSG00000026043	ENSMUST00000186021	Col3a1	collagen, type III, alpha 1	AW550625|Col3a-1|Tsk-2|Tsk2
1_45366225_45366541	317	1_45366225_45366541	-	38	0	8.56052	9.60067e-12	4.38615e-11	Up	Distal Intergenic	ENSMUSG00000026043	ENSMUST00000186021	Col3a1	collagen, type III, alpha 1	AW550625|Col3a-1|Tsk-2|Tsk2
1_45394973_45395353	381	1_45394973_45395353	-	26	0	8.01479	2.21221e-08	4.74092e-08	Up	Promoter (1-2kb)	ENSMUSG00000026042	ENSMUST00000150143	Col5a2	collagen, type V, alpha 2	1110014L14Rik
1_45492279_45492602	324	1_45492279_45492602	-	28	0	8.12131	7.04361e-09	1.66011e-08	Up	Exon (ENSMUST00000192814/ENSMUSG00000104476, exon 1 of 1)	ENSMUSG00000104476	ENSMUST00000192814	Gm38211	-	-
1_45504788_45505043	256	1_45504788_45505043	-	28	0	8.12131	7.04361e-09	1.66011e-08	Up	Promoter (1-2kb)	ENSMUSG00000026042	ENSMUST00000086430	Col5a2	collagen, type V, alpha 2	1110014L14Rik
1_45539837_45540075	239	1_45539837_45540075	-	27	0	8.06903	1.24618e-08	2.79243e-08	Up	Distal Intergenic	ENSMUSG00000100361	ENSMUST00000186840	Gm7063	-	-
1_45568387_45568796	410	1_45568387_45568796	-	46	0	8.83549	8.98453e-14	7.11197e-13	Up	Distal Intergenic	ENSMUSG00000100894	ENSMUST00000185744	Gm8304	-	-
1_45571828_45572802	975	1_45571828_45572802	1_45572448_45572796	77	30	1.91759	1.54883e-07	2.96439e-07	Up	Distal Intergenic	ENSMUSG00000100894	ENSMUST00000185744	Gm8304	-	-
1_45578594_45579514	921	1_45578594_45578963;1_45579130_45579514	1_45578961_45579502	84	54	1.19814	0.000265216	0.000375205	Up	Distal Intergenic	ENSMUSG00000100894	ENSMUST00000185744	Gm8304	-	-
1_45580180_45580546	367	1_45580180_45580546	-	45	0	8.80385	1.49345e-13	1.11491e-12	Up	Distal Intergenic	ENSMUSG00000100894	ENSMUST00000185744	Gm8304	-	-
1_45625725_45626267	543	1_45625725_45626267	-	43	0	8.73841	4.15962e-13	2.73662e-12	Up	Distal Intergenic	ENSMUSG00000100894	ENSMUST00000185744	Gm8304	-	-
1_45794953_45796294	1342	1_45794953_45795446	1_45794956_45796294	106	378	-1.27056	8.88597e-07	1.53104e-06	Down	Promoter (<=1kb)	ENSMUSG00000025995	ENSMUST00000027139	Wdr75	WD repeat domain 75	1300003A18Rik|2410118I19Rik|C77608
1_45797836_45798206	371	-	1_45797836_45798206	0	36	-7.9217	1.01568e-07	1.94955e-07	Down	Intron (ENSMUST00000027139/ENSMUSG00000025995, intron 1 of 20)	ENSMUSG00000025995	ENSMUST00000147308	Wdr75	WD repeat domain 75	1300003A18Rik|2410118I19Rik|C77608
1_45864385_45864661	277	1_45864385_45864661	-	30	0	8.2205	1.29729e-09	3.54454e-09	Up	Distal Intergenic	ENSMUSG00000084817	ENSMUST00000153604	Gm5526	-	-
1_45965485_45965795	311	-	1_45965485_45965795	0	28	-7.56082	4.812e-06	7.49864e-06	Down	Distal Intergenic	ENSMUSG00000099946	ENSMUST00000191295	Gm9496	-	-
1_46135886_46136156	271	1_46135886_46136156	-	26	0	8.01479	2.21221e-08	4.74092e-08	Up	Intron (ENSMUST00000069293/ENSMUSG00000041144, intron 17 of 65)	ENSMUSG00000041144	ENSMUST00000190792	Dnah7b	dynein, axonemal, heavy chain 7B	Dnahc7b|Gm107
1_46154819_46155510	692	-	1_46154819_46155510	0	43	-8.17707	4.08541e-09	1.01592e-08	Down	Intron (ENSMUST00000069293/ENSMUSG00000041144, intron 20 of 65)	ENSMUSG00000041144	ENSMUST00000190792	Dnah7b	dynein, axonemal, heavy chain 7B	Dnahc7b|Gm107
1_46177221_46177721	501	-	1_46177221_46177721	0	32	-7.75251	9.08175e-07	1.53104e-06	Down	Exon (ENSMUST00000069293/ENSMUSG00000041144, exon 22 of 66)	ENSMUSG00000041144	ENSMUST00000190792	Dnah7b	dynein, axonemal, heavy chain 7B	Dnahc7b|Gm107
1_46211756_46212170	415	1_46211756_46212170	-	26	0	8.01479	2.21221e-08	4.74092e-08	Up	Intron (ENSMUST00000069293/ENSMUSG00000041144, intron 32 of 65)	ENSMUSG00000041144	ENSMUST00000187548	Dnah7b	dynein, axonemal, heavy chain 7B	Dnahc7b|Gm107
1_46231423_46231661	239	1_46231423_46231661	-	23	0	7.83864	2.27396e-07	4.21299e-07	Up	Intron (ENSMUST00000069293/ENSMUSG00000041144, intron 41 of 65)	ENSMUSG00000041144	ENSMUST00000187548	Dnah7b	dynein, axonemal, heavy chain 7B	Dnahc7b|Gm107
1_46236334_46236572	239	1_46236334_46236572	-	19	0	7.56433	1.3552e-06	2.2703e-06	Up	Exon (ENSMUST00000187548/ENSMUSG00000041144, exon 1 of 7)	ENSMUSG00000041144	ENSMUST00000187548	Dnah7b	dynein, axonemal, heavy chain 7B	Dnahc7b|Gm107
1_46246732_46247014	283	1_46246732_46247014	-	30	0	8.2205	1.29729e-09	3.54454e-09	Up	Intron (ENSMUST00000069293/ENSMUSG00000041144, intron 46 of 65)	ENSMUSG00000041144	ENSMUST00000187548	Dnah7b	dynein, axonemal, heavy chain 7B	Dnahc7b|Gm107
1_46247805_46248096	292	1_46247805_46248096	-	25	0	7.95843	3.94049e-08	8.10452e-08	Up	Intron (ENSMUST00000069293/ENSMUSG00000041144, intron 46 of 65)	ENSMUSG00000041144	ENSMUST00000187548	Dnah7b	dynein, axonemal, heavy chain 7B	Dnahc7b|Gm107
1_46250357_46250887	531	1_46250357_46250887	-	42	0	8.70454	1.17118e-12	7.07889e-12	Up	Intron (ENSMUST00000069293/ENSMUSG00000041144, intron 47 of 65)	ENSMUSG00000041144	ENSMUST00000187548	Dnah7b	dynein, axonemal, heavy chain 7B	Dnahc7b|Gm107
1_46251487_46251725	239	1_46251487_46251725	-	22	0	7.7748	4.1078e-07	7.32295e-07	Up	Intron (ENSMUST00000069293/ENSMUSG00000041144, intron 47 of 65)	ENSMUSG00000041144	ENSMUST00000187548	Dnah7b	dynein, axonemal, heavy chain 7B	Dnahc7b|Gm107
1_46291892_46292227	336	1_46291892_46292227	-	50	0	8.95553	7.35991e-15	7.54998e-14	Up	Intron (ENSMUST00000069293/ENSMUSG00000041144, intron 52 of 65)	ENSMUSG00000041144	ENSMUST00000185557	Dnah7b	dynein, axonemal, heavy chain 7B	Dnahc7b|Gm107
1_46616795_46617078	284	1_46616795_46617078	-	23	0	7.83864	2.27396e-07	4.21299e-07	Up	Intron (ENSMUST00000189749/ENSMUSG00000101337, intron 27 of 64)	ENSMUSG00000101337	ENSMUST00000178395	Dnah7c	dynein, axonemal, heavy chain 7C	Dnahc7c
1_46635695_46636058	364	-	1_46635695_46636058	0	30	-7.65985	1.5797e-06	2.60196e-06	Down	Intron (ENSMUST00000189749/ENSMUSG00000101337, intron 30 of 64)	ENSMUSG00000101337	ENSMUST00000189339	Dnah7c	dynein, axonemal, heavy chain 7C	Dnahc7c
1_46852565_46853622	1058	-	1_46852565_46853622	0	134	-9.8135	1.33025e-22	8.37699e-21	Down	5' UTR	ENSMUSG00000025986	ENSMUST00000027131	Slc39a10	solute carrier family 39 (zinc transporter), member 10	2900042E17Rik|5430433I10|mKIAA1265
1_47833491_47833944	454	-	1_47833491_47833944	0	40	-8.0731	2.01468e-08	4.43681e-08	Down	Distal Intergenic	ENSMUSG00000101996	ENSMUST00000186401	Gm19206	-	-
1_48000492_48001148	657	-	1_48000492_48001148	0	50	-8.39396	1.79489e-10	6.15694e-10	Down	Distal Intergenic	ENSMUSG00000101996	ENSMUST00000186401	Gm19206	-	-
1_48650096_48650691	596	-	1_48650096_48650691	0	50	-8.39396	1.79489e-10	6.15694e-10	Down	Distal Intergenic	ENSMUSG00000101721	ENSMUST00000189223	Gm8354	-	-
1_48652481_48652757	277	1_48652481_48652757	-	34	0	8.4005	1.42164e-10	4.99774e-10	Up	Distal Intergenic	ENSMUSG00000101721	ENSMUST00000189223	Gm8354	-	-
1_49885689_49885938	250	1_49885689_49885938	-	32	0	8.31331	4.26767e-10	1.30949e-09	Up	Distal Intergenic	ENSMUSG00000101760	ENSMUST00000190905	Gm8384	-	-
1_50975641_50976093	453	1_50975641_50976093	-	42	0	8.70454	1.17118e-12	7.07889e-12	Up	Intron (ENSMUST00000114565/ENSMUSG00000026109, intron 9 of 9)	ENSMUSG00000026109	ENSMUST00000175165	Tmeff2	transmembrane protein with EGF-like and two follistatin-like domains 2	4832418D20Rik|7630402F16Rik|TR-2
1_51093811_51094632	822	-	1_51093811_51094632	0	56	-8.557	1.41877e-11	6.40067e-11	Down	Intron (ENSMUST00000081851/ENSMUSG00000026109, intron 5 of 9)	ENSMUSG00000026109	ENSMUST00000189560	Tmeff2	transmembrane protein with EGF-like and two follistatin-like domains 2	4832418D20Rik|7630402F16Rik|TR-2
1_51215844_51216292	449	-	1_51215844_51216292	0	31	-7.70693	9.08175e-07	1.53104e-06	Down	Downstream (2-3kb)	ENSMUSG00000099625	ENSMUST00000190705	Gm29325	-	-
1_51477853_51478415	563	-	1_51477853_51478415	0	61	-8.68007	1.9438e-12	1.10472e-11	Down	Promoter (<=1kb)	ENSMUSG00000026107	ENSMUST00000189542	Nabp1	nucleic acid binding protein 1	4930434H03Rik|4930442A21Rik|4930488J04Rik|4933440J18Rik|5830411E10Rik|AI852561|Nbp1|Obfc2a|Ssb2
1_51478579_51479520	942	1_51478697_51479107	1_51478579_51479520	46	170	-1.32098	2.08785e-05	3.10047e-05	Down	Promoter (1-2kb)	ENSMUSG00000026107	ENSMUST00000188051	Nabp1	nucleic acid binding protein 1	4930434H03Rik|4930442A21Rik|4930488J04Rik|4933440J18Rik|5830411E10Rik|AI852561|Nbp1|Obfc2a|Ssb2
1_51572468_51572953	486	-	1_51572468_51572953	0	37	-7.96106	5.909e-08	1.17873e-07	Down	Intron (ENSMUST00000189410/ENSMUSG00000099413, intron 1 of 3)	ENSMUSG00000099413	ENSMUST00000189410	Gm17767	-	-
1_51797948_51798584	637	1_51797948_51798584	-	41	0	8.66986	1.97336e-12	1.10472e-11	Up	Intron (ENSMUST00000046390/ENSMUSG00000018417, intron 21 of 29)	ENSMUSG00000018417	ENSMUST00000136701	Myo1b	myosin IB	AA406997|MIH-L|MMIa
1_51808617_51808978	362	1_51808617_51808978	-	41	0	8.66986	1.97336e-12	1.10472e-11	Up	Intron (ENSMUST00000046390/ENSMUSG00000018417, intron 23 of 29)	ENSMUSG00000018417	ENSMUST00000135125	Myo1b	myosin IB	AA406997|MIH-L|MMIa
1_51815811_51816095	285	1_51815811_51816095	-	26	0	8.01479	2.21221e-08	4.74092e-08	Up	Intron (ENSMUST00000046390/ENSMUSG00000018417, intron 24 of 29)	ENSMUSG00000018417	ENSMUST00000135125	Myo1b	myosin IB	AA406997|MIH-L|MMIa
1_51825691_51825964	274	1_51825691_51825964	-	27	0	8.06903	1.24618e-08	2.79243e-08	Up	Intron (ENSMUST00000046390/ENSMUSG00000018417, intron 26 of 29)	ENSMUSG00000018417	ENSMUST00000135125	Myo1b	myosin IB	AA406997|MIH-L|MMIa
1_51835866_51836477	612	-	1_51835866_51836477	0	39	-8.03672	3.4461e-08	7.26383e-08	Down	Intron (ENSMUST00000046390/ENSMUSG00000018417, intron 27 of 29)	ENSMUSG00000018417	ENSMUST00000186428	Myo1b	myosin IB	AA406997|MIH-L|MMIa
1_51837740_51838174	435	-	1_51837740_51838174	0	27	-7.50864	8.426e-06	1.282e-05	Down	Intron (ENSMUST00000046390/ENSMUSG00000018417, intron 27 of 29)	ENSMUSG00000018417	ENSMUST00000186428	Myo1b	myosin IB	AA406997|MIH-L|MMIa
1_51840552_51841077	526	-	1_51840552_51841077	0	44	-8.21012	2.41201e-09	6.33597e-09	Down	Intron (ENSMUST00000046390/ENSMUSG00000018417, intron 27 of 29)	ENSMUSG00000018417	ENSMUST00000186428	Myo1b	myosin IB	AA406997|MIH-L|MMIa
1_51849446_51849730	285	1_51849446_51849730	-	31	0	8.26765	7.42892e-10	2.14936e-09	Up	Promoter (<=1kb)	ENSMUSG00000101724	ENSMUST00000186428	Gm29453	-	-
1_51879739_51880116	378	1_51879739_51880116	-	40	0	8.63433	3.33429e-12	1.75371e-11	Up	Promoter (<=1kb)	ENSMUSG00000100313	ENSMUST00000186817	Gm28323	-	-
1_51896673_51897018	346	1_51896673_51897018	-	25	0	7.95843	3.94049e-08	8.10452e-08	Up	Promoter (<=1kb)	ENSMUSG00000018417	ENSMUST00000144694	Myo1b	myosin IB	AA406997|MIH-L|MMIa
1_51914402_51915856	1455	1_51915232_51915470	1_51914402_51915856	35	171	-1.72272	1.2431e-07	2.38318e-07	Down	5' UTR	ENSMUSG00000018417	ENSMUST00000151525	Myo1b	myosin IB	AA406997|MIH-L|MMIa
1_51980771_51981068	298	1_51980771_51981068	-	26	0	8.01479	2.21221e-08	4.74092e-08	Up	Distal Intergenic	ENSMUSG00000062939	ENSMUST00000168302	Stat4	signal transducer and activator of transcription 4	-
1_52113296_52113853	558	1_52113433_52113801	1_52113296_52113853	45	147	-1.14309	0.000307937	0.000434498	Down	Intron (ENSMUST00000185516/ENSMUSG00000101628, intron 11 of 33)	ENSMUSG00000101628	ENSMUST00000186574	Gm28177	-	-
1_52118968_52119278	311	-	1_52118968_52119278	0	41	-8.1086	1.18072e-08	2.73413e-08	Down	Promoter (<=1kb)	ENSMUSG00000026104	ENSMUST00000186574	Stat1	signal transducer and activator of transcription 1	2010005J02Rik|AA408197
1_52231489_52233255	1767	1_52231489_52232305	1_52231640_52233255	70	225	-1.12042	7.35039e-05	0.000106103	Down	Promoter (<=1kb)	ENSMUSG00000026103	ENSMUST00000114513	Gls	glutaminase	6330442B14|AI314027|B230365M23Rik
1_52233421_52233890	470	-	1_52233421_52233890	0	55	-8.53107	2.34568e-11	9.9103e-11	Down	Promoter (<=1kb)	ENSMUSG00000026103	ENSMUST00000114510	Gls	glutaminase	6330442B14|AI314027|B230365M23Rik
1_52243295_52243727	433	1_52243295_52243727	-	38	0	8.56052	9.60067e-12	4.38615e-11	Up	Distal Intergenic	ENSMUSG00000026103	ENSMUST00000114510	Gls	glutaminase	6330442B14|AI314027|B230365M23Rik
1_52524732_52524981	250	1_52524732_52524981	-	20	0	7.63795	7.44748e-07	1.2962e-06	Up	Intron (ENSMUST00000189527/ENSMUSG00000100120, intron 1 of 4)	ENSMUSG00000100120	ENSMUST00000189527	Gm553	-	-
1_52630574_52631315	742	1_52630715_52631168	1_52630574_52631315	95	281	-1.00085	0.000191661	0.000272533	Down	Promoter (<=1kb)	ENSMUSG00000043015	ENSMUST00000165859	Nemp2	nuclear envelope integral membrane protein 2	5330401P04Rik|9830163O08|Tmem194b
1_52718261_52718513	253	1_52718261_52718513	-	35	0	8.4422	8.24314e-11	3.08621e-10	Up	Intron (ENSMUST00000156876/ENSMUSG00000041439, intron 6 of 6)	ENSMUSG00000041439	ENSMUST00000147421	Mfsd6	major facilitator superfamily domain containing 6	2210010L05Rik|9630025I22Rik|AI836200|AW212394|MMR2
1_52758677_52758952	276	1_52758677_52758952	-	30	0	8.2205	1.29729e-09	3.54454e-09	Up	Downstream (1-2kb)	ENSMUSG00000100230	ENSMUST00000188413	Gm28650	-	-
1_52864653_52865038	386	1_52864653_52865038	-	40	0	8.63433	3.33429e-12	1.75371e-11	Up	Promoter (<=1kb)	ENSMUSG00000041426	ENSMUST00000159431	Hibch	3-hydroxyisobutyryl-Coenzyme A hydrolase	2610509I15Rik|HIBYL-COA-H
1_52927961_52928260	300	1_52927961_52928260	-	28	0	8.12131	7.04361e-09	1.66011e-08	Up	Intron (ENSMUST00000050567/ENSMUSG00000043629, intron 1 of 1)	ENSMUSG00000043629	ENSMUST00000050567	1700019D03Rik	RIKEN cDNA 1700019D03 gene	2410136C24Rik|AA410151|smAKAP
1_52928453_52929000	548	1_52928453_52929000	-	56	0	9.11872	2.45896e-16	3.62401e-15	Up	Intron (ENSMUST00000050567/ENSMUSG00000043629, intron 1 of 1)	ENSMUSG00000043629	ENSMUST00000050567	1700019D03Rik	RIKEN cDNA 1700019D03 gene	2410136C24Rik|AA410151|smAKAP
1_52932638_52933133	496	1_52932638_52933133	1_52932738_52933048	41	26	1.21537	0.00480939	0.00639288	Up	Intron (ENSMUST00000050567/ENSMUSG00000043629, intron 1 of 1)	ENSMUSG00000043629	ENSMUST00000050567	1700019D03Rik	RIKEN cDNA 1700019D03 gene	2410136C24Rik|AA410151|smAKAP
1_52933713_52934590	878	1_52933713_52934590	1_52933956_52934583	90	60	1.14595	0.000369208	0.000519291	Up	Intron (ENSMUST00000050567/ENSMUSG00000043629, intron 1 of 1)	ENSMUSG00000043629	ENSMUST00000050567	1700019D03Rik	RIKEN cDNA 1700019D03 gene	2410136C24Rik|AA410151|smAKAP
1_52934824_52935350	527	1_52934824_52935350	1_52934900_52935335	63	43	1.11129	0.00174499	0.00238121	Up	Intron (ENSMUST00000050567/ENSMUSG00000043629, intron 1 of 1)	ENSMUSG00000043629	ENSMUST00000050567	1700019D03Rik	RIKEN cDNA 1700019D03 gene	2410136C24Rik|AA410151|smAKAP
1_52960082_52960344	263	1_52960082_52960344	-	27	0	8.06903	1.24618e-08	2.79243e-08	Up	Intron (ENSMUST00000114493/ENSMUSG00000043629, intron 1 of 1)	ENSMUSG00000043629	ENSMUST00000114493	1700019D03Rik	RIKEN cDNA 1700019D03 gene	2410136C24Rik|AA410151|smAKAP
1_53209631_53210051	421	1_53209631_53210051	-	43	0	8.73841	4.15962e-13	2.73662e-12	Up	Intron (ENSMUST00000027267/ENSMUSG00000026098, intron 7 of 12)	ENSMUSG00000026098	ENSMUST00000191402	Pms1	PMS1 homolog 1, mismatch repair system component	-
1_53210614_53210957	344	-	1_53210614_53210957	0	41	-8.1086	1.18072e-08	2.73413e-08	Down	Intron (ENSMUST00000027267/ENSMUSG00000026098, intron 7 of 12)	ENSMUSG00000026098	ENSMUST00000191402	Pms1	PMS1 homolog 1, mismatch repair system component	-
1_53215161_53215520	360	1_53215161_53215520	-	36	0	8.48273	4.79413e-11	1.90587e-10	Up	Intron (ENSMUST00000027267/ENSMUSG00000026098, intron 7 of 12)	ENSMUSG00000026098	ENSMUST00000191402	Pms1	PMS1 homolog 1, mismatch repair system component	-
1_53296674_53297665	992	1_53297166_53297414	1_53296674_53297665	49	272	-1.90762	1.01298e-10	3.7881e-10	Down	Promoter (<=1kb)	ENSMUSG00000026097	ENSMUST00000135746	Ormdl1	ORM1-like 1 (S. cerevisiae)	C730042F17Rik
1_53297870_53298270	401	-	1_53297870_53298270	0	34	-7.83958	3.02271e-07	5.50653e-07	Down	Intron (ENSMUST00000135746/ENSMUSG00000026097, intron 1 of 1)	ENSMUSG00000026097	ENSMUST00000190734	Ormdl1	ORM1-like 1 (S. cerevisiae)	C730042F17Rik
1_53376673_53376929	257	1_53376673_53376929	-	36	0	8.48273	4.79413e-11	1.90587e-10	Up	Distal Intergenic	ENSMUSG00000100069	ENSMUST00000190697	Gm6801	-	-
1_53577443_53578517	1075	1_53577443_53578501	1_53578118_53578517	91	28	2.25733	3.91932e-10	1.26121e-09	Up	Intron (ENSMUST00000094964/ENSMUSG00000096141, intron 44 of 65)	ENSMUSG00000096141	ENSMUST00000094964	Dnah7a	dynein, axonemal, heavy chain 7A	Dnahc7|Dnahc7a|Gm992
1_53578699_53579069	371	-	1_53578699_53579069	0	34	-7.83958	3.02271e-07	5.50653e-07	Down	Intron (ENSMUST00000094964/ENSMUSG00000096141, intron 44 of 65)	ENSMUSG00000096141	ENSMUST00000094964	Dnah7a	dynein, axonemal, heavy chain 7A	Dnahc7|Dnahc7a|Gm992
1_53585557_53586025	469	1_53585557_53586025	-	38	0	8.56052	9.60067e-12	4.38615e-11	Up	Intron (ENSMUST00000094964/ENSMUSG00000096141, intron 46 of 65)	ENSMUSG00000096141	ENSMUST00000094964	Dnah7a	dynein, axonemal, heavy chain 7A	Dnahc7|Dnahc7a|Gm992
1_53709821_53710190	370	1_53709821_53710190	-	29	0	8.17176	3.99443e-09	1.00658e-08	Up	Distal Intergenic	ENSMUSG00000096141	ENSMUST00000189677	Dnah7a	dynein, axonemal, heavy chain 7A	Dnahc7|Dnahc7a|Gm992
1_53745954_53746870	917	1_53746402_53746870	1_53745954_53746545	54	28	1.50552	0.000147133	0.000210093	Up	Distal Intergenic	ENSMUSG00000026094	ENSMUST00000187066	Stk17b	serine/threonine kinase 17b (apoptosis-inducing)	3110009A03Rik|AI120141|Drak2
1_53747925_53748685	761	-	1_53747925_53748685	0	77	-9.01539	3.89954e-15	4.40038e-14	Down	Distal Intergenic	ENSMUSG00000026094	ENSMUST00000187066	Stk17b	serine/threonine kinase 17b (apoptosis-inducing)	3110009A03Rik|AI120141|Drak2
1_53753812_53754923	1112	1_53753812_53754923	1_53753856_53754305	114	34	2.30335	1.04902e-11	4.78756e-11	Up	Downstream (<1kb)	ENSMUSG00000026094	ENSMUST00000187066	Stk17b	serine/threonine kinase 17b (apoptosis-inducing)	3110009A03Rik|AI120141|Drak2
1_53784262_53785226	965	-	1_53784262_53785226	0	92	-9.27171	1.11374e-17	2.31387e-16	Down	Promoter (<=1kb)	ENSMUSG00000026094	ENSMUST00000027263	Stk17b	serine/threonine kinase 17b (apoptosis-inducing)	3110009A03Rik|AI120141|Drak2
1_53814018_53814352	335	1_53814018_53814352	-	31	0	8.26765	7.42892e-10	2.14936e-09	Up	Intron (ENSMUST00000120904/ENSMUSG00000042807, intron 1 of 28)	ENSMUSG00000042807	ENSMUST00000194911	Hecw2	HECT, C2 and WW domain containing E3 ubiquitin protein ligase 2	A730039N16Rik|D030049F17Rik|Gm971|Nedl2|mKIAA1301
1_53817462_53818083	622	1_53817462_53818083	-	62	0	9.26531	9.20566e-18	1.93493e-16	Up	Intron (ENSMUST00000120904/ENSMUSG00000042807, intron 1 of 28)	ENSMUSG00000042807	ENSMUST00000150677	Hecw2	HECT, C2 and WW domain containing E3 ubiquitin protein ligase 2	A730039N16Rik|D030049F17Rik|Gm971|Nedl2|mKIAA1301
1_53818661_53818911	251	1_53818661_53818911	-	28	0	8.12131	7.04361e-09	1.66011e-08	Up	Intron (ENSMUST00000120904/ENSMUSG00000042807, intron 1 of 28)	ENSMUSG00000042807	ENSMUST00000150677	Hecw2	HECT, C2 and WW domain containing E3 ubiquitin protein ligase 2	A730039N16Rik|D030049F17Rik|Gm971|Nedl2|mKIAA1301
1_53823430_53823866	437	1_53823430_53823866	1_53823458_53823804	56	31	1.41179	0.000236571	0.000335281	Up	Intron (ENSMUST00000120904/ENSMUSG00000042807, intron 1 of 28)	ENSMUSG00000042807	ENSMUST00000150677	Hecw2	HECT, C2 and WW domain containing E3 ubiquitin protein ligase 2	A730039N16Rik|D030049F17Rik|Gm971|Nedl2|mKIAA1301
1_53824478_53824801	324	1_53824478_53824801	-	34	0	8.4005	1.42164e-10	4.99774e-10	Up	Intron (ENSMUST00000120904/ENSMUSG00000042807, intron 1 of 28)	ENSMUSG00000042807	ENSMUST00000150677	Hecw2	HECT, C2 and WW domain containing E3 ubiquitin protein ligase 2	A730039N16Rik|D030049F17Rik|Gm971|Nedl2|mKIAA1301
1_53825026_53825406	381	1_53825026_53825406	-	36	0	8.48273	4.79413e-11	1.90587e-10	Up	Intron (ENSMUST00000120904/ENSMUSG00000042807, intron 1 of 28)	ENSMUSG00000042807	ENSMUST00000150677	Hecw2	HECT, C2 and WW domain containing E3 ubiquitin protein ligase 2	A730039N16Rik|D030049F17Rik|Gm971|Nedl2|mKIAA1301
1_53838090_53838428	339	1_53838090_53838428	-	30	0	8.2205	1.29729e-09	3.54454e-09	Up	Intron (ENSMUST00000120904/ENSMUSG00000042807, intron 6 of 28)	ENSMUSG00000042807	ENSMUST00000150677	Hecw2	HECT, C2 and WW domain containing E3 ubiquitin protein ligase 2	A730039N16Rik|D030049F17Rik|Gm971|Nedl2|mKIAA1301
1_53838980_53839452	473	1_53838980_53839452	-	52	0	9.012	2.75344e-15	3.17747e-14	Up	Exon (ENSMUST00000120904/ENSMUSG00000042807, exon 23 of 29)	ENSMUSG00000042807	ENSMUST00000150677	Hecw2	HECT, C2 and WW domain containing E3 ubiquitin protein ligase 2	A730039N16Rik|D030049F17Rik|Gm971|Nedl2|mKIAA1301
1_53844196_53844544	349	1_53844196_53844544	-	34	0	8.4005	1.42164e-10	4.99774e-10	Up	Intron (ENSMUST00000120904/ENSMUSG00000042807, intron 8 of 28)	ENSMUSG00000042807	ENSMUST00000150677	Hecw2	HECT, C2 and WW domain containing E3 ubiquitin protein ligase 2	A730039N16Rik|D030049F17Rik|Gm971|Nedl2|mKIAA1301
1_53848252_53848680	429	1_53848252_53848680	-	40	0	8.63433	3.33429e-12	1.75371e-11	Up	Promoter (<=1kb)	ENSMUSG00000098443	ENSMUST00000184834	Mir7681	microRNA 7681	Gm27806|mmu-mir-7681
1_53854039_53854404	366	-	1_53854039_53854404	0	25	-7.39824	2.59951e-05	3.8153e-05	Down	Intron (ENSMUST00000120904/ENSMUSG00000042807, intron 10 of 28)	ENSMUSG00000042807	ENSMUST00000184834	Hecw2	HECT, C2 and WW domain containing E3 ubiquitin protein ligase 2	A730039N16Rik|D030049F17Rik|Gm971|Nedl2|mKIAA1301
1_53858310_53858548	239	1_53858310_53858548	-	23	0	7.83864	2.27396e-07	4.21299e-07	Up	Intron (ENSMUST00000120904/ENSMUSG00000042807, intron 10 of 28)	ENSMUSG00000042807	ENSMUST00000152870	Hecw2	HECT, C2 and WW domain containing E3 ubiquitin protein ligase 2	A730039N16Rik|D030049F17Rik|Gm971|Nedl2|mKIAA1301
1_53859515_53860359	845	-	1_53859515_53860359	0	45	-8.24243	2.41201e-09	6.33597e-09	Down	Intron (ENSMUST00000120904/ENSMUSG00000042807, intron 10 of 28)	ENSMUSG00000042807	ENSMUST00000152870	Hecw2	HECT, C2 and WW domain containing E3 ubiquitin protein ligase 2	A730039N16Rik|D030049F17Rik|Gm971|Nedl2|mKIAA1301
1_53861236_53861619	384	1_53861236_53861619	-	42	0	8.70454	1.17118e-12	7.07889e-12	Up	Intron (ENSMUST00000120904/ENSMUSG00000042807, intron 10 of 28)	ENSMUSG00000042807	ENSMUST00000152870	Hecw2	HECT, C2 and WW domain containing E3 ubiquitin protein ligase 2	A730039N16Rik|D030049F17Rik|Gm971|Nedl2|mKIAA1301
1_53862719_53863109	391	-	1_53862719_53863109	0	35	-7.88122	1.75007e-07	3.29918e-07	Down	Intron (ENSMUST00000120904/ENSMUSG00000042807, intron 10 of 28)	ENSMUSG00000042807	ENSMUST00000152870	Hecw2	HECT, C2 and WW domain containing E3 ubiquitin protein ligase 2	A730039N16Rik|D030049F17Rik|Gm971|Nedl2|mKIAA1301
1_53872493_53872731	239	1_53872493_53872731	-	26	0	8.01479	2.21221e-08	4.74092e-08	Up	Intron (ENSMUST00000120904/ENSMUSG00000042807, intron 12 of 28)	ENSMUSG00000042807	ENSMUST00000152870	Hecw2	HECT, C2 and WW domain containing E3 ubiquitin protein ligase 2	A730039N16Rik|D030049F17Rik|Gm971|Nedl2|mKIAA1301
1_53875653_53875965	313	1_53875653_53875965	-	33	0	8.35756	2.45934e-10	8.02848e-10	Up	Intron (ENSMUST00000120904/ENSMUSG00000042807, intron 12 of 28)	ENSMUSG00000042807	ENSMUST00000152870	Hecw2	HECT, C2 and WW domain containing E3 ubiquitin protein ligase 2	A730039N16Rik|D030049F17Rik|Gm971|Nedl2|mKIAA1301
1_53910672_53911228	557	1_53910672_53911228	-	46	0	8.83549	8.98453e-14	7.11197e-13	Up	Intron (ENSMUST00000120904/ENSMUSG00000042807, intron 16 of 28)	ENSMUSG00000042807	ENSMUST00000157324	Hecw2	HECT, C2 and WW domain containing E3 ubiquitin protein ligase 2	A730039N16Rik|D030049F17Rik|Gm971|Nedl2|mKIAA1301
1_53983609_53983987	379	1_53983609_53983987	-	39	0	8.59789	5.64977e-12	2.78967e-11	Up	Intron (ENSMUST00000120904/ENSMUSG00000042807, intron 27 of 28)	ENSMUSG00000042807	ENSMUST00000157324	Hecw2	HECT, C2 and WW domain containing E3 ubiquitin protein ligase 2	A730039N16Rik|D030049F17Rik|Gm971|Nedl2|mKIAA1301
1_54001219_54001490	272	1_54001219_54001490	-	28	0	8.12131	7.04361e-09	1.66011e-08	Up	Intron (ENSMUST00000120904/ENSMUSG00000042807, intron 27 of 28)	ENSMUSG00000042807	ENSMUST00000157324	Hecw2	HECT, C2 and WW domain containing E3 ubiquitin protein ligase 2	A730039N16Rik|D030049F17Rik|Gm971|Nedl2|mKIAA1301
1_54039581_54040077	497	-	1_54039581_54040077	0	39	-8.03672	3.4461e-08	7.26383e-08	Down	Intron (ENSMUST00000120904/ENSMUSG00000042807, intron 27 of 28)	ENSMUSG00000042807	ENSMUST00000192858	Hecw2	HECT, C2 and WW domain containing E3 ubiquitin protein ligase 2	A730039N16Rik|D030049F17Rik|Gm971|Nedl2|mKIAA1301
1_54040791_54041095	305	1_54040791_54041095	-	37	0	8.52215	1.63617e-11	7.0045e-11	Up	Intron (ENSMUST00000120904/ENSMUSG00000042807, intron 28 of 28)	ENSMUSG00000042807	ENSMUST00000192858	Hecw2	HECT, C2 and WW domain containing E3 ubiquitin protein ligase 2	A730039N16Rik|D030049F17Rik|Gm971|Nedl2|mKIAA1301
1_54046860_54048093	1234	1_54046860_54048093	-	108	0	10.065	2.98885e-27	4.68301e-25	Up	Intron (ENSMUST00000120904/ENSMUSG00000042807, intron 28 of 28)	ENSMUSG00000042807	ENSMUST00000192858	Hecw2	HECT, C2 and WW domain containing E3 ubiquitin protein ligase 2	A730039N16Rik|D030049F17Rik|Gm971|Nedl2|mKIAA1301
1_54054924_54055162	239	1_54054924_54055162	-	34	0	8.4005	1.42164e-10	4.99774e-10	Up	Intron (ENSMUST00000120904/ENSMUSG00000042807, intron 28 of 28)	ENSMUSG00000042807	ENSMUST00000192858	Hecw2	HECT, C2 and WW domain containing E3 ubiquitin protein ligase 2	A730039N16Rik|D030049F17Rik|Gm971|Nedl2|mKIAA1301
1_54095501_54095825	325	1_54095501_54095825	-	40	0	8.63433	3.33429e-12	1.75371e-11	Up	Intron (ENSMUST00000120904/ENSMUSG00000042807, intron 28 of 28)	ENSMUSG00000042807	ENSMUST00000192858	Hecw2	HECT, C2 and WW domain containing E3 ubiquitin protein ligase 2	A730039N16Rik|D030049F17Rik|Gm971|Nedl2|mKIAA1301
1_54103673_54103927	255	1_54103673_54103927	-	24	0	7.89978	7.04324e-08	1.37487e-07	Up	Intron (ENSMUST00000120904/ENSMUSG00000042807, intron 28 of 28)	ENSMUSG00000042807	ENSMUST00000192858	Hecw2	HECT, C2 and WW domain containing E3 ubiquitin protein ligase 2	A730039N16Rik|D030049F17Rik|Gm971|Nedl2|mKIAA1301
1_54126229_54126894	666	1_54126229_54126894	-	45	0	8.80385	1.49345e-13	1.11491e-12	Up	Intron (ENSMUST00000120904/ENSMUSG00000042807, intron 28 of 28)	ENSMUSG00000042807	ENSMUST00000192858	Hecw2	HECT, C2 and WW domain containing E3 ubiquitin protein ligase 2	A730039N16Rik|D030049F17Rik|Gm971|Nedl2|mKIAA1301
1_54127571_54127868	298	1_54127571_54127868	-	23	0	7.83864	2.27396e-07	4.21299e-07	Up	Intron (ENSMUST00000120904/ENSMUSG00000042807, intron 28 of 28)	ENSMUSG00000042807	ENSMUST00000192858	Hecw2	HECT, C2 and WW domain containing E3 ubiquitin protein ligase 2	A730039N16Rik|D030049F17Rik|Gm971|Nedl2|mKIAA1301
1_54128878_54129225	348	-	1_54128878_54129225	0	27	-7.50864	8.426e-06	1.282e-05	Down	Intron (ENSMUST00000120904/ENSMUSG00000042807, intron 28 of 28)	ENSMUSG00000042807	ENSMUST00000192858	Hecw2	HECT, C2 and WW domain containing E3 ubiquitin protein ligase 2	A730039N16Rik|D030049F17Rik|Gm971|Nedl2|mKIAA1301
1_54129261_54129499	239	1_54129261_54129499	-	21	0	7.708	4.1078e-07	7.32295e-07	Up	Intron (ENSMUST00000120904/ENSMUSG00000042807, intron 28 of 28)	ENSMUSG00000042807	ENSMUST00000192858	Hecw2	HECT, C2 and WW domain containing E3 ubiquitin protein ligase 2	A730039N16Rik|D030049F17Rik|Gm971|Nedl2|mKIAA1301
1_54150344_54150703	360	1_54150344_54150703	-	26	0	8.01479	2.21221e-08	4.74092e-08	Up	Intron (ENSMUST00000120904/ENSMUSG00000042807, intron 28 of 28)	ENSMUSG00000042807	ENSMUST00000192858	Hecw2	HECT, C2 and WW domain containing E3 ubiquitin protein ligase 2	A730039N16Rik|D030049F17Rik|Gm971|Nedl2|mKIAA1301
1_54177205_54177515	311	-	1_54177205_54177515	0	30	-7.65985	1.5797e-06	2.60196e-06	Down	Intron (ENSMUST00000120904/ENSMUSG00000042807, intron 28 of 28)	ENSMUSG00000042807	ENSMUST00000120904	Hecw2	HECT, C2 and WW domain containing E3 ubiquitin protein ligase 2	A730039N16Rik|D030049F17Rik|Gm971|Nedl2|mKIAA1301
1_54181037_54181357	321	1_54181037_54181357	-	25	0	7.95843	3.94049e-08	8.10452e-08	Up	Intron (ENSMUST00000120904/ENSMUSG00000042807, intron 28 of 28)	ENSMUSG00000042807	ENSMUST00000120904	Hecw2	HECT, C2 and WW domain containing E3 ubiquitin protein ligase 2	A730039N16Rik|D030049F17Rik|Gm971|Nedl2|mKIAA1301
1_54186125_54186957	833	1_54186125_54186957	-	70	0	9.44013	1.57453e-19	5.08953e-18	Up	Intron (ENSMUST00000120904/ENSMUSG00000042807, intron 28 of 28)	ENSMUSG00000042807	ENSMUST00000120904	Hecw2	HECT, C2 and WW domain containing E3 ubiquitin protein ligase 2	A730039N16Rik|D030049F17Rik|Gm971|Nedl2|mKIAA1301
1_54191489_54191760	272	1_54191489_54191760	-	28	0	8.12131	7.04361e-09	1.66011e-08	Up	Intron (ENSMUST00000120904/ENSMUSG00000042807, intron 28 of 28)	ENSMUSG00000042807	ENSMUST00000120904	Hecw2	HECT, C2 and WW domain containing E3 ubiquitin protein ligase 2	A730039N16Rik|D030049F17Rik|Gm971|Nedl2|mKIAA1301
1_54196693_54197300	608	1_54196693_54197300	-	66	0	9.35536	9.40652e-19	2.53261e-17	Up	Distal Intergenic	ENSMUSG00000042807	ENSMUST00000146850	Hecw2	HECT, C2 and WW domain containing E3 ubiquitin protein ligase 2	A730039N16Rik|D030049F17Rik|Gm971|Nedl2|mKIAA1301
1_54198856_54199954	1099	1_54199441_54199881	1_54198856_54199954	90	350	-1.3954	1.21852e-07	2.33627e-07	Down	Distal Intergenic	ENSMUSG00000042807	ENSMUST00000146850	Hecw2	HECT, C2 and WW domain containing E3 ubiquitin protein ligase 2	A730039N16Rik|D030049F17Rik|Gm971|Nedl2|mKIAA1301
1_54206243_54206586	344	1_54206243_54206586	-	29	0	8.17176	3.99443e-09	1.00658e-08	Up	Distal Intergenic	ENSMUSG00000042807	ENSMUST00000146850	Hecw2	HECT, C2 and WW domain containing E3 ubiquitin protein ligase 2	A730039N16Rik|D030049F17Rik|Gm971|Nedl2|mKIAA1301
1_54210548_54210927	380	-	1_54210548_54210927	0	40	-8.0731	2.01468e-08	4.43681e-08	Down	Distal Intergenic	ENSMUSG00000042807	ENSMUST00000146850	Hecw2	HECT, C2 and WW domain containing E3 ubiquitin protein ligase 2	A730039N16Rik|D030049F17Rik|Gm971|Nedl2|mKIAA1301
1_54212622_54212885	264	1_54212622_54212885	-	19	0	7.56433	1.3552e-06	2.2703e-06	Up	Distal Intergenic	ENSMUSG00000042807	ENSMUST00000146850	Hecw2	HECT, C2 and WW domain containing E3 ubiquitin protein ligase 2	A730039N16Rik|D030049F17Rik|Gm971|Nedl2|mKIAA1301
1_54219144_54219411	268	1_54219144_54219411	-	25	0	7.95843	3.94049e-08	8.10452e-08	Up	Distal Intergenic	ENSMUSG00000042807	ENSMUST00000146850	Hecw2	HECT, C2 and WW domain containing E3 ubiquitin protein ligase 2	A730039N16Rik|D030049F17Rik|Gm971|Nedl2|mKIAA1301
1_54219662_54219900	239	1_54219662_54219900	-	23	0	7.83864	2.27396e-07	4.21299e-07	Up	Distal Intergenic	ENSMUSG00000042807	ENSMUST00000146850	Hecw2	HECT, C2 and WW domain containing E3 ubiquitin protein ligase 2	A730039N16Rik|D030049F17Rik|Gm971|Nedl2|mKIAA1301
1_54221877_54222187	311	-	1_54221877_54222187	0	20	-7.07845	2.86152e-05	4.18444e-05	Down	Distal Intergenic	ENSMUSG00000042807	ENSMUST00000146850	Hecw2	HECT, C2 and WW domain containing E3 ubiquitin protein ligase 2	A730039N16Rik|D030049F17Rik|Gm971|Nedl2|mKIAA1301
1_54396158_54396595	438	1_54396158_54396595	-	45	0	8.80385	1.49345e-13	1.11491e-12	Up	3' UTR	ENSMUSG00000041303	ENSMUST00000190419	Gtf3c3	general transcription factor IIIC, polypeptide 3	TF3C-gamma|TFIIIC102
1_54400676_54401060	385	1_54400676_54401060	-	43	0	8.73841	4.15962e-13	2.73662e-12	Up	Intron (ENSMUST00000041638/ENSMUSG00000041303, intron 2 of 17)	ENSMUSG00000041303	ENSMUST00000190419	Gtf3c3	general transcription factor IIIC, polypeptide 3	TF3C-gamma|TFIIIC102
1_54402503_54402778	276	1_54402503_54402778	-	26	0	8.01479	2.21221e-08	4.74092e-08	Up	Intron (ENSMUST00000041638/ENSMUSG00000041303, intron 2 of 17)	ENSMUSG00000041303	ENSMUST00000190419	Gtf3c3	general transcription factor IIIC, polypeptide 3	TF3C-gamma|TFIIIC102
1_54421101_54421822	722	1_54421290_54421822	1_54421101_54421411	41	25	1.27162	0.00311624	0.00419314	Up	Intron (ENSMUST00000041638/ENSMUSG00000041303, intron 10 of 17)	ENSMUSG00000041303	ENSMUST00000190419	Gtf3c3	general transcription factor IIIC, polypeptide 3	TF3C-gamma|TFIIIC102
1_54422517_54422805	289	1_54422517_54422805	-	41	0	8.66986	1.97336e-12	1.10472e-11	Up	Intron (ENSMUST00000041638/ENSMUSG00000041303, intron 10 of 17)	ENSMUSG00000041303	ENSMUST00000190419	Gtf3c3	general transcription factor IIIC, polypeptide 3	TF3C-gamma|TFIIIC102
1_54424864_54425172	309	1_54424864_54425172	-	37	0	8.52215	1.63617e-11	7.0045e-11	Up	Promoter (1-2kb)	ENSMUSG00000041303	ENSMUST00000190419	Gtf3c3	general transcription factor IIIC, polypeptide 3	TF3C-gamma|TFIIIC102
1_54425334_54425593	260	1_54425334_54425593	-	34	0	8.4005	1.42164e-10	4.99774e-10	Up	Promoter (1-2kb)	ENSMUSG00000041303	ENSMUST00000190419	Gtf3c3	general transcription factor IIIC, polypeptide 3	TF3C-gamma|TFIIIC102
1_54426131_54426406	276	1_54426131_54426406	-	28	0	8.12131	7.04361e-09	1.66011e-08	Up	Intron (ENSMUST00000041638/ENSMUSG00000041303, intron 12 of 17)	ENSMUSG00000041303	ENSMUST00000190419	Gtf3c3	general transcription factor IIIC, polypeptide 3	TF3C-gamma|TFIIIC102
1_54430355_54430928	574	1_54430355_54430928	-	50	0	8.95553	7.35991e-15	7.54998e-14	Up	Exon (ENSMUST00000041638/ENSMUSG00000041303, exon 4 of 18)	ENSMUSG00000041303	ENSMUST00000189906	Gtf3c3	general transcription factor IIIC, polypeptide 3	TF3C-gamma|TFIIIC102
1_54434628_54434936	309	1_54434628_54434936	-	29	0	8.17176	3.99443e-09	1.00658e-08	Up	Intron (ENSMUST00000041638/ENSMUSG00000041303, intron 16 of 17)	ENSMUSG00000041303	ENSMUST00000041638	Gtf3c3	general transcription factor IIIC, polypeptide 3	TF3C-gamma|TFIIIC102
1_54448628_54448870	243	1_54448628_54448870	-	24	0	7.89978	7.04324e-08	1.37487e-07	Up	Distal Intergenic	ENSMUSG00000041303	ENSMUST00000041638	Gtf3c3	general transcription factor IIIC, polypeptide 3	TF3C-gamma|TFIIIC102
1_54449202_54449492	291	1_54449202_54449492	-	36	0	8.48273	4.79413e-11	1.90587e-10	Up	Distal Intergenic	ENSMUSG00000041303	ENSMUST00000041638	Gtf3c3	general transcription factor IIIC, polypeptide 3	TF3C-gamma|TFIIIC102
1_54451931_54452528	598	1_54451931_54452528	-	46	0	8.83549	8.98453e-14	7.11197e-13	Up	Distal Intergenic	ENSMUSG00000041303	ENSMUST00000041638	Gtf3c3	general transcription factor IIIC, polypeptide 3	TF3C-gamma|TFIIIC102
1_54458379_54458653	275	1_54458379_54458653	-	25	0	7.95843	3.94049e-08	8.10452e-08	Up	Distal Intergenic	ENSMUSG00000041303	ENSMUST00000041638	Gtf3c3	general transcription factor IIIC, polypeptide 3	TF3C-gamma|TFIIIC102
1_54464669_54464921	253	1_54464669_54464921	-	27	0	8.06903	1.24618e-08	2.79243e-08	Up	Distal Intergenic	ENSMUSG00000041303	ENSMUST00000041638	Gtf3c3	general transcription factor IIIC, polypeptide 3	TF3C-gamma|TFIIIC102
1_54465113_54465428	316	1_54465113_54465428	-	34	0	8.4005	1.42164e-10	4.99774e-10	Up	Distal Intergenic	ENSMUSG00000041303	ENSMUST00000041638	Gtf3c3	general transcription factor IIIC, polypeptide 3	TF3C-gamma|TFIIIC102
1_54467416_54467872	457	1_54467416_54467872	-	35	0	8.4422	8.24314e-11	3.08621e-10	Up	Distal Intergenic	ENSMUSG00000041303	ENSMUST00000041638	Gtf3c3	general transcription factor IIIC, polypeptide 3	TF3C-gamma|TFIIIC102
1_54469512_54469822	311	-	1_54469512_54469822	0	34	-7.83958	3.02271e-07	5.50653e-07	Down	Distal Intergenic	ENSMUSG00000041303	ENSMUST00000041638	Gtf3c3	general transcription factor IIIC, polypeptide 3	TF3C-gamma|TFIIIC102
1_54472673_54472980	308	1_54472673_54472980	-	27	0	8.06903	1.24618e-08	2.79243e-08	Up	Downstream (<1kb)	ENSMUSG00000041303	ENSMUST00000041638	Gtf3c3	general transcription factor IIIC, polypeptide 3	TF3C-gamma|TFIIIC102
1_54494251_54495405	1155	1_54494251_54495405	-	109	0	10.0783	2.06637e-27	3.39245e-25	Up	Exon (ENSMUST00000097739/ENSMUSG00000073678, exon 21 of 27)	ENSMUSG00000073678	ENSMUST00000194316	Pgap1	post-GPI attachment to proteins 1	5033403E17Rik|9030223K07Rik|A530084K22|D230012E17Rik|oto
1_54495907_54496217	311	-	1_54495907_54496217	0	38	-7.99939	5.909e-08	1.17873e-07	Down	Intron (ENSMUST00000097739/ENSMUSG00000073678, intron 7 of 26)	ENSMUSG00000073678	ENSMUST00000194316	Pgap1	post-GPI attachment to proteins 1	5033403E17Rik|9030223K07Rik|A530084K22|D230012E17Rik|oto
1_54496594_54497006	413	-	1_54496594_54497006	0	42	-8.14324	6.93678e-09	1.66011e-08	Down	Intron (ENSMUST00000097739/ENSMUSG00000073678, intron 7 of 26)	ENSMUSG00000073678	ENSMUST00000194316	Pgap1	post-GPI attachment to proteins 1	5033403E17Rik|9030223K07Rik|A530084K22|D230012E17Rik|oto
1_54497118_54497465	348	1_54497118_54497465	-	39	0	8.59789	5.64977e-12	2.78967e-11	Up	Intron (ENSMUST00000097739/ENSMUSG00000073678, intron 7 of 26)	ENSMUSG00000073678	ENSMUST00000194316	Pgap1	post-GPI attachment to proteins 1	5033403E17Rik|9030223K07Rik|A530084K22|D230012E17Rik|oto
1_54498820_54499459	640	1_54498820_54499459	-	70	0	9.44013	1.57453e-19	5.08953e-18	Up	Intron (ENSMUST00000097739/ENSMUSG00000073678, intron 8 of 26)	ENSMUSG00000073678	ENSMUST00000194316	Pgap1	post-GPI attachment to proteins 1	5033403E17Rik|9030223K07Rik|A530084K22|D230012E17Rik|oto
1_54501114_54501720	607	-	1_54501114_54501720	0	56	-8.557	1.41877e-11	6.40067e-11	Down	Intron (ENSMUST00000097739/ENSMUSG00000073678, intron 8 of 26)	ENSMUSG00000073678	ENSMUST00000194316	Pgap1	post-GPI attachment to proteins 1	5033403E17Rik|9030223K07Rik|A530084K22|D230012E17Rik|oto
1_54504266_54504566	301	1_54504266_54504566	-	30	0	8.2205	1.29729e-09	3.54454e-09	Up	Intron (ENSMUST00000097739/ENSMUSG00000073678, intron 8 of 26)	ENSMUSG00000073678	ENSMUST00000194316	Pgap1	post-GPI attachment to proteins 1	5033403E17Rik|9030223K07Rik|A530084K22|D230012E17Rik|oto
1_54508148_54509144	997	1_54508148_54509144	-	94	0	9.8649	1.33409e-24	1.24971e-22	Up	Intron (ENSMUST00000097739/ENSMUSG00000073678, intron 8 of 26)	ENSMUSG00000073678	ENSMUST00000194316	Pgap1	post-GPI attachment to proteins 1	5033403E17Rik|9030223K07Rik|A530084K22|D230012E17Rik|oto
1_54512541_54513005	465	-	1_54512541_54513005	0	36	-7.9217	1.01568e-07	1.94955e-07	Down	Exon (ENSMUST00000097739/ENSMUSG00000073678, exon 15 of 27)	ENSMUSG00000073678	ENSMUST00000194316	Pgap1	post-GPI attachment to proteins 1	5033403E17Rik|9030223K07Rik|A530084K22|D230012E17Rik|oto
1_54534415_54534767	353	1_54534415_54534767	-	38	0	8.56052	9.60067e-12	4.38615e-11	Up	Intron (ENSMUST00000097739/ENSMUSG00000073678, intron 22 of 26)	ENSMUSG00000073678	ENSMUST00000187949	Pgap1	post-GPI attachment to proteins 1	5033403E17Rik|9030223K07Rik|A530084K22|D230012E17Rik|oto
1_54536860_54537170	311	-	1_54536860_54537170	0	20	-7.07845	2.86152e-05	4.18444e-05	Down	Intron (ENSMUST00000097739/ENSMUSG00000073678, intron 23 of 26)	ENSMUSG00000073678	ENSMUST00000187949	Pgap1	post-GPI attachment to proteins 1	5033403E17Rik|9030223K07Rik|A530084K22|D230012E17Rik|oto
1_54538019_54538260	242	1_54538019_54538260	-	34	0	8.4005	1.42164e-10	4.99774e-10	Up	Intron (ENSMUST00000097739/ENSMUSG00000073678, intron 23 of 26)	ENSMUSG00000073678	ENSMUST00000187949	Pgap1	post-GPI attachment to proteins 1	5033403E17Rik|9030223K07Rik|A530084K22|D230012E17Rik|oto
1_54551804_54552290	487	1_54551804_54552290	-	55	0	9.09277	3.96752e-16	5.44693e-15	Up	Intron (ENSMUST00000097739/ENSMUSG00000073678, intron 26 of 26)	ENSMUSG00000073678	ENSMUST00000189506	Pgap1	post-GPI attachment to proteins 1	5033403E17Rik|9030223K07Rik|A530084K22|D230012E17Rik|oto
1_54552517_54553099	583	1_54552517_54553099	-	48	0	8.89676	3.27725e-14	2.96107e-13	Up	Intron (ENSMUST00000097739/ENSMUSG00000073678, intron 26 of 26)	ENSMUSG00000073678	ENSMUST00000189506	Pgap1	post-GPI attachment to proteins 1	5033403E17Rik|9030223K07Rik|A530084K22|D230012E17Rik|oto
1_54558037_54558618	582	-	1_54558037_54558618	0	44	-8.21012	2.41201e-09	6.33597e-09	Down	Promoter (<=1kb)	ENSMUSG00000073678	ENSMUST00000185817	Pgap1	post-GPI attachment to proteins 1	5033403E17Rik|9030223K07Rik|A530084K22|D230012E17Rik|oto
1_54559805_54560275	471	1_54559805_54560275	-	39	0	8.59789	5.64977e-12	2.78967e-11	Up	Distal Intergenic	ENSMUSG00000073678	ENSMUST00000185817	Pgap1	post-GPI attachment to proteins 1	5033403E17Rik|9030223K07Rik|A530084K22|D230012E17Rik|oto
1_54569043_54569405	363	1_54569043_54569405	-	31	0	8.26765	7.42892e-10	2.14936e-09	Up	Downstream (1-2kb)	ENSMUSG00000101130	ENSMUST00000185933	Gm19637	-	-
1_54576350_54576735	386	1_54576350_54576735	-	45	0	8.80385	1.49345e-13	1.11491e-12	Up	Distal Intergenic	ENSMUSG00000101130	ENSMUST00000185933	Gm19637	-	-
1_54577865_54578692	828	-	1_54577865_54578692	0	69	-8.85745	6.54767e-14	5.43583e-13	Down	Distal Intergenic	ENSMUSG00000101130	ENSMUST00000185933	Gm19637	-	-
1_54578781_54579028	248	1_54578781_54579028	-	27	0	8.06903	1.24618e-08	2.79243e-08	Up	Distal Intergenic	ENSMUSG00000101130	ENSMUST00000185933	Gm19637	-	-
1_54606966_54607641	676	1_54607022_54607641	1_54606966_54607545	76	35	1.67738	2.31495e-06	3.79772e-06	Up	Distal Intergenic	ENSMUSG00000101130	ENSMUST00000185933	Gm19637	-	-
1_54607767_54608210	444	-	1_54607767_54608210	0	35	-7.88122	1.75007e-07	3.29918e-07	Down	Distal Intergenic	ENSMUSG00000052331	ENSMUST00000189563	Ankrd44	ankyrin repeat domain 44	4930444A19Rik|A130096K20|E130014H08Rik|PP6-ARS-B
1_54615243_54615553	311	1_54615243_54615553	-	27	0	8.06903	1.24618e-08	2.79243e-08	Up	Distal Intergenic	ENSMUSG00000052331	ENSMUST00000189563	Ankrd44	ankyrin repeat domain 44	4930444A19Rik|A130096K20|E130014H08Rik|PP6-ARS-B
1_54626424_54626956	533	1_54626424_54626956	-	39	0	8.59789	5.64977e-12	2.78967e-11	Up	Distal Intergenic	ENSMUSG00000052331	ENSMUST00000189563	Ankrd44	ankyrin repeat domain 44	4930444A19Rik|A130096K20|E130014H08Rik|PP6-ARS-B
1_54637885_54638296	412	1_54637885_54638296	-	34	0	8.4005	1.42164e-10	4.99774e-10	Up	Distal Intergenic	ENSMUSG00000052331	ENSMUST00000189563	Ankrd44	ankyrin repeat domain 44	4930444A19Rik|A130096K20|E130014H08Rik|PP6-ARS-B
1_54641002_54641395	394	-	1_54641002_54641395	0	33	-7.79671	5.23325e-07	9.17763e-07	Down	Distal Intergenic	ENSMUSG00000052331	ENSMUST00000189563	Ankrd44	ankyrin repeat domain 44	4930444A19Rik|A130096K20|E130014H08Rik|PP6-ARS-B
1_54646707_54647908	1202	-	1_54646707_54647908	0	67	-8.8151	1.70595e-13	1.2575e-12	Down	3' UTR	ENSMUSG00000052331	ENSMUST00000189563	Ankrd44	ankyrin repeat domain 44	4930444A19Rik|A130096K20|E130014H08Rik|PP6-ARS-B
1_54648033_54648363	331	1_54648033_54648363	-	39	0	8.59789	5.64977e-12	2.78967e-11	Up	3' UTR	ENSMUSG00000052331	ENSMUST00000189563	Ankrd44	ankyrin repeat domain 44	4930444A19Rik|A130096K20|E130014H08Rik|PP6-ARS-B
1_54649508_54649790	283	1_54649508_54649790	-	38	0	8.56052	9.60067e-12	4.38615e-11	Up	Promoter (1-2kb)	ENSMUSG00000052331	ENSMUST00000189563	Ankrd44	ankyrin repeat domain 44	4930444A19Rik|A130096K20|E130014H08Rik|PP6-ARS-B
1_54651049_54652530	1482	1_54651049_54652530	-	115	0	10.1555	1.62022e-28	3.10547e-26	Up	Exon (ENSMUST00000179030/ENSMUSG00000052331, exon 27 of 28)	ENSMUSG00000052331	ENSMUST00000189563	Ankrd44	ankyrin repeat domain 44	4930444A19Rik|A130096K20|E130014H08Rik|PP6-ARS-B
1_54659007_54659397	391	-	1_54659007_54659397	0	27	-7.50864	8.426e-06	1.282e-05	Down	Promoter (1-2kb)	ENSMUSG00000052331	ENSMUST00000178156	Ankrd44	ankyrin repeat domain 44	4930444A19Rik|A130096K20|E130014H08Rik|PP6-ARS-B
1_54660841_54661264	424	-	1_54660841_54661264	0	41	-8.1086	1.18072e-08	2.73413e-08	Down	Exon (ENSMUST00000179030/ENSMUSG00000052331, exon 21 of 28)	ENSMUSG00000052331	ENSMUST00000178156	Ankrd44	ankyrin repeat domain 44	4930444A19Rik|A130096K20|E130014H08Rik|PP6-ARS-B
1_54662680_54663314	635	1_54662680_54663314	1_54662791_54663195	40	28	1.0735	0.00921389	0.012017	Up	Exon (ENSMUST00000179030/ENSMUSG00000052331, exon 20 of 28)	ENSMUSG00000052331	ENSMUST00000178156	Ankrd44	ankyrin repeat domain 44	4930444A19Rik|A130096K20|E130014H08Rik|PP6-ARS-B
1_54663663_54664150	488	1_54663663_54664150	-	52	0	9.012	2.75344e-15	3.17747e-14	Up	Exon (ENSMUST00000179030/ENSMUSG00000052331, exon 19 of 28)	ENSMUSG00000052331	ENSMUST00000178156	Ankrd44	ankyrin repeat domain 44	4930444A19Rik|A130096K20|E130014H08Rik|PP6-ARS-B
1_54675334_54675699	366	1_54675334_54675699	-	34	0	8.4005	1.42164e-10	4.99774e-10	Up	Intron (ENSMUST00000179030/ENSMUSG00000052331, intron 11 of 27)	ENSMUSG00000052331	ENSMUST00000190007	Ankrd44	ankyrin repeat domain 44	4930444A19Rik|A130096K20|E130014H08Rik|PP6-ARS-B
1_54676181_54676596	416	-	1_54676181_54676596	0	33	-7.79671	5.23325e-07	9.17763e-07	Down	Intron (ENSMUST00000179030/ENSMUSG00000052331, intron 11 of 27)	ENSMUSG00000052331	ENSMUST00000190007	Ankrd44	ankyrin repeat domain 44	4930444A19Rik|A130096K20|E130014H08Rik|PP6-ARS-B
1_54677292_54677579	288	1_54677292_54677579	-	31	0	8.26765	7.42892e-10	2.14936e-09	Up	Intron (ENSMUST00000179030/ENSMUSG00000052331, intron 11 of 27)	ENSMUSG00000052331	ENSMUST00000190007	Ankrd44	ankyrin repeat domain 44	4930444A19Rik|A130096K20|E130014H08Rik|PP6-ARS-B
1_54678642_54678982	341	-	1_54678642_54678982	0	31	-7.70693	9.08175e-07	1.53104e-06	Down	Intron (ENSMUST00000179030/ENSMUSG00000052331, intron 11 of 27)	ENSMUSG00000052331	ENSMUST00000190007	Ankrd44	ankyrin repeat domain 44	4930444A19Rik|A130096K20|E130014H08Rik|PP6-ARS-B
1_54757510_54757763	254	1_54757510_54757763	-	23	0	7.83864	2.27396e-07	4.21299e-07	Up	Intron (ENSMUST00000188243/ENSMUSG00000101674, intron 2 of 2)	ENSMUSG00000101674	ENSMUST00000178226	4930444A19Rik	-	-
1_54800279_54800610	332	1_54800279_54800610	-	28	0	8.12131	7.04361e-09	1.66011e-08	Up	Intron (ENSMUST00000179030/ENSMUSG00000052331, intron 26 of 27)	ENSMUSG00000052331	ENSMUST00000178905	Ankrd44	ankyrin repeat domain 44	4930444A19Rik|A130096K20|E130014H08Rik|PP6-ARS-B
1_54806664_54806902	239	1_54806664_54806902	-	30	0	8.2205	1.29729e-09	3.54454e-09	Up	Intron (ENSMUST00000179030/ENSMUSG00000052331, intron 26 of 27)	ENSMUSG00000052331	ENSMUST00000178905	Ankrd44	ankyrin repeat domain 44	4930444A19Rik|A130096K20|E130014H08Rik|PP6-ARS-B
1_54815332_54815729	398	1_54815332_54815729	-	39	0	8.59789	5.64977e-12	2.78967e-11	Up	Intron (ENSMUST00000179030/ENSMUSG00000052331, intron 26 of 27)	ENSMUSG00000052331	ENSMUST00000178905	Ankrd44	ankyrin repeat domain 44	4930444A19Rik|A130096K20|E130014H08Rik|PP6-ARS-B
1_54854457_54854728	272	1_54854457_54854728	-	31	0	8.26765	7.42892e-10	2.14936e-09	Up	Intron (ENSMUST00000179030/ENSMUSG00000052331, intron 27 of 27)	ENSMUSG00000052331	ENSMUST00000177679	Ankrd44	ankyrin repeat domain 44	4930444A19Rik|A130096K20|E130014H08Rik|PP6-ARS-B
1_54860171_54861605	1435	-	1_54860171_54861605	0	204	-10.4193	2.74334e-31	8.95191e-29	Down	Intron (ENSMUST00000179030/ENSMUSG00000052331, intron 27 of 27)	ENSMUSG00000052331	ENSMUST00000177679	Ankrd44	ankyrin repeat domain 44	4930444A19Rik|A130096K20|E130014H08Rik|PP6-ARS-B
1_54886369_54886931	563	-	1_54886369_54886931	0	48	-8.33525	5.03731e-10	1.52689e-09	Down	Intron (ENSMUST00000179030/ENSMUSG00000052331, intron 27 of 27)	ENSMUSG00000052331	ENSMUST00000177679	Ankrd44	ankyrin repeat domain 44	4930444A19Rik|A130096K20|E130014H08Rik|PP6-ARS-B
1_54887320_54887802	483	1_54887320_54887802	-	45	0	8.80385	1.49345e-13	1.11491e-12	Up	Intron (ENSMUST00000179030/ENSMUSG00000052331, intron 27 of 27)	ENSMUSG00000052331	ENSMUST00000177679	Ankrd44	ankyrin repeat domain 44	4930444A19Rik|A130096K20|E130014H08Rik|PP6-ARS-B
1_54898761_54899670	910	1_54899081_54899670	1_54898761_54899224	54	29	1.45516	0.000244433	0.000346231	Up	Intron (ENSMUST00000179030/ENSMUSG00000052331, intron 27 of 27)	ENSMUSG00000052331	ENSMUST00000177679	Ankrd44	ankyrin repeat domain 44	4930444A19Rik|A130096K20|E130014H08Rik|PP6-ARS-B
1_54899922_54900250	329	1_54899922_54900250	-	33	0	8.35756	2.45934e-10	8.02848e-10	Up	Intron (ENSMUST00000179030/ENSMUSG00000052331, intron 27 of 27)	ENSMUSG00000052331	ENSMUST00000177679	Ankrd44	ankyrin repeat domain 44	4930444A19Rik|A130096K20|E130014H08Rik|PP6-ARS-B
1_54900511_54901226	716	1_54900511_54901226	-	60	0	9.21808	3.71245e-17	6.70091e-16	Up	Intron (ENSMUST00000179030/ENSMUSG00000052331, intron 27 of 27)	ENSMUSG00000052331	ENSMUST00000193052	Ankrd44	ankyrin repeat domain 44	4930444A19Rik|A130096K20|E130014H08Rik|PP6-ARS-B
1_54909300_54909624	325	1_54909300_54909624	-	45	0	8.80385	1.49345e-13	1.11491e-12	Up	Intron (ENSMUST00000179030/ENSMUSG00000052331, intron 27 of 27)	ENSMUSG00000052331	ENSMUST00000193052	Ankrd44	ankyrin repeat domain 44	4930444A19Rik|A130096K20|E130014H08Rik|PP6-ARS-B
1_54910088_54910506	419	1_54910088_54910506	-	38	0	8.56052	9.60067e-12	4.38615e-11	Up	Intron (ENSMUST00000179030/ENSMUSG00000052331, intron 27 of 27)	ENSMUSG00000052331	ENSMUST00000193052	Ankrd44	ankyrin repeat domain 44	4930444A19Rik|A130096K20|E130014H08Rik|PP6-ARS-B
1_54912101_54912793	693	1_54912101_54912793	1_54912201_54912732	57	29	1.53302	0.0001104	0.000158286	Up	Intron (ENSMUST00000179030/ENSMUSG00000052331, intron 27 of 27)	ENSMUSG00000052331	ENSMUST00000193052	Ankrd44	ankyrin repeat domain 44	4930444A19Rik|A130096K20|E130014H08Rik|PP6-ARS-B
1_54913776_54914198	423	1_54913776_54914198	-	33	0	8.35756	2.45934e-10	8.02848e-10	Up	Exon (ENSMUST00000193052/ENSMUSG00000102642, exon 1 of 1)	ENSMUSG00000102642	ENSMUST00000193052	A130048G24Rik	-	-
1_54929314_54929616	303	1_54929314_54929616	-	34	0	8.4005	1.42164e-10	4.99774e-10	Up	Distal Intergenic	ENSMUSG00000052331	ENSMUST00000179030	Ankrd44	ankyrin repeat domain 44	4930444A19Rik|A130096K20|E130014H08Rik|PP6-ARS-B
1_54930502_54930939	438	-	1_54930502_54930939	0	41	-8.1086	1.18072e-08	2.73413e-08	Down	Distal Intergenic	ENSMUSG00000052331	ENSMUST00000179030	Ankrd44	ankyrin repeat domain 44	4930444A19Rik|A130096K20|E130014H08Rik|PP6-ARS-B
1_54986631_54986882	252	1_54986631_54986882	-	39	0	8.59789	5.64977e-12	2.78967e-11	Up	3' UTR	ENSMUSG00000025982	ENSMUST00000190175	Sf3b1	splicing factor 3b, subunit 1	155kDa|2810001M05Rik|AA409119|Prp10|SAP155|SF3b155|TA-8|Targ4
1_55014729_55015011	283	1_55014729_55015011	-	30	0	8.2205	1.29729e-09	3.54454e-09	Up	Promoter (<=1kb)	ENSMUSG00000025982	ENSMUST00000188859	Sf3b1	splicing factor 3b, subunit 1	155kDa|2810001M05Rik|AA409119|Prp10|SAP155|SF3b155|TA-8|Targ4
1_55018748_55018986	239	1_55018748_55018986	-	23	0	7.83864	2.27396e-07	4.21299e-07	Up	Intron (ENSMUST00000027127/ENSMUSG00000025982, intron 23 of 24)	ENSMUSG00000025982	ENSMUST00000188419	Sf3b1	splicing factor 3b, subunit 1	155kDa|2810001M05Rik|AA409119|Prp10|SAP155|SF3b155|TA-8|Targ4
1_55020205_55020672	468	-	1_55020205_55020672	0	37	-7.96106	5.909e-08	1.17873e-07	Down	Intron (ENSMUST00000027127/ENSMUSG00000025982, intron 24 of 24)	ENSMUSG00000025982	ENSMUST00000188419	Sf3b1	splicing factor 3b, subunit 1	155kDa|2810001M05Rik|AA409119|Prp10|SAP155|SF3b155|TA-8|Targ4
1_55024339_55024826	488	-	1_55024339_55024826	0	42	-8.14324	6.93678e-09	1.66011e-08	Down	Intron (ENSMUST00000027127/ENSMUSG00000025982, intron 24 of 24)	ENSMUSG00000025982	ENSMUST00000189051	Sf3b1	splicing factor 3b, subunit 1	155kDa|2810001M05Rik|AA409119|Prp10|SAP155|SF3b155|TA-8|Targ4
1_55052303_55052613	311	-	1_55052303_55052613	0	46	-8.27404	1.42755e-09	3.85364e-09	Down	Promoter (<=1kb)	ENSMUSG00000025981	ENSMUST00000087617	Coq10b	coenzyme Q10B	1500041J02Rik|1700030I21Rik|9530077A17Rik|AV002237|AW742641
1_55052841_55053245	405	-	1_55052841_55053245	0	65	-8.77148	4.48437e-13	2.89102e-12	Down	Promoter (<=1kb)	ENSMUSG00000025981	ENSMUST00000185474	Coq10b	coenzyme Q10B	1500041J02Rik|1700030I21Rik|9530077A17Rik|AV002237|AW742641
1_55082933_55083684	752	-	1_55082933_55083684	0	55	-8.53107	2.34568e-11	9.9103e-11	Down	Exon (ENSMUST00000027123/ENSMUSG00000025980, exon 5 of 12)	ENSMUSG00000025980	ENSMUST00000075242	Hspd1	heat shock protein 1 (chaperonin)	60kDa|CPN60|HSP-60|HSP-65|Hsp60
1_55083728_55084592	865	1_55083728_55084592	-	82	0	9.66809	3.85558e-22	2.25031e-20	Up	Exon (ENSMUST00000027123/ENSMUSG00000025980, exon 3 of 12)	ENSMUSG00000025980	ENSMUST00000075242	Hspd1	heat shock protein 1 (chaperonin)	60kDa|CPN60|HSP-60|HSP-65|Hsp60
1_55084593_55090501	5909	1_55085734_55087739;1_55088356_55090162	1_55084593_55090501	504	1614	-1.11603	3.49816e-07	6.36651e-07	Down	Promoter (<=1kb)	ENSMUSG00000025980	ENSMUST00000027123	Hspd1	heat shock protein 1 (chaperonin)	60kDa|CPN60|HSP-60|HSP-65|Hsp60
1_55108292_55108791	500	1_55108292_55108791	-	45	0	8.80385	1.49345e-13	1.11491e-12	Up	Distal Intergenic	ENSMUSG00000100736	ENSMUST00000185999	Gm5147	-	-
1_55151685_55151923	239	1_55151685_55151923	-	26	0	8.01479	2.21221e-08	4.74092e-08	Up	Intron (ENSMUST00000159311/ENSMUSG00000025979, intron 6 of 6)	ENSMUSG00000025979	ENSMUST00000187422	Mob4	MOB family member 4, phocein	2610109B12Rik|Mobkl3|Phocn|Prei3
1_55163155_55163438	284	1_55163155_55163438	-	29	0	8.17176	3.99443e-09	1.00658e-08	Up	Distal Intergenic	ENSMUSG00000061863	ENSMUST00000161440	Gm6822	-	-
1_55163837_55164318	482	1_55163837_55164318	-	48	0	8.89676	3.27725e-14	2.96107e-13	Up	Distal Intergenic	ENSMUSG00000061863	ENSMUST00000161440	Gm6822	-	-
1_55186000_55186481	482	-	1_55186000_55186481	0	32	-7.75251	9.08175e-07	1.53104e-06	Down	Intron (ENSMUST00000027121/ENSMUSG00000025978, intron 2 of 8)	ENSMUSG00000025978	ENSMUST00000133294	Rftn2	raftlin family member 2	2700010E02Rik|3222401M22Rik
1_55189850_55190350	501	1_55189850_55190350	-	48	0	8.89676	3.27725e-14	2.96107e-13	Up	Intron (ENSMUST00000027121/ENSMUSG00000025978, intron 2 of 8)	ENSMUSG00000025978	ENSMUST00000133294	Rftn2	raftlin family member 2	2700010E02Rik|3222401M22Rik
1_55201026_55201642	617	-	1_55201026_55201642	0	53	-8.47778	6.45764e-11	2.53503e-10	Down	3' UTR	ENSMUSG00000025978	ENSMUST00000133294	Rftn2	raftlin family member 2	2700010E02Rik|3222401M22Rik
1_55205639_55205921	283	1_55205639_55205921	-	29	0	8.17176	3.99443e-09	1.00658e-08	Up	Intron (ENSMUST00000027121/ENSMUSG00000025978, intron 5 of 8)	ENSMUSG00000025978	ENSMUST00000133294	Rftn2	raftlin family member 2	2700010E02Rik|3222401M22Rik
1_55206092_55207043	952	1_55206092_55207043	1_55206159_55206863	116	63	1.4415	2.59276e-06	4.20612e-06	Up	Promoter (<=1kb)	ENSMUSG00000025978	ENSMUST00000133294	Rftn2	raftlin family member 2	2700010E02Rik|3222401M22Rik
1_55215890_55216602	713	1_55215890_55216602	1_55216064_55216374	70	27	1.93149	3.86468e-07	7.03016e-07	Up	Intron (ENSMUST00000027121/ENSMUSG00000025978, intron 8 of 8)	ENSMUSG00000025978	ENSMUST00000133294	Rftn2	raftlin family member 2	2700010E02Rik|3222401M22Rik
1_55217958_55218424	467	1_55217958_55218424	-	52	0	9.012	2.75344e-15	3.17747e-14	Up	Intron (ENSMUST00000027121/ENSMUSG00000025978, intron 8 of 8)	ENSMUSG00000025978	ENSMUST00000181563	Rftn2	raftlin family member 2	2700010E02Rik|3222401M22Rik
1_55221236_55222141	906	-	1_55221236_55222141	0	60	-8.65628	3.18385e-12	1.75371e-11	Down	Intron (ENSMUST00000027121/ENSMUSG00000025978, intron 8 of 8)	ENSMUSG00000025978	ENSMUST00000181563	Rftn2	raftlin family member 2	2700010E02Rik|3222401M22Rik
1_55222251_55222807	557	1_55222251_55222807	-	55	0	9.09277	3.96752e-16	5.44693e-15	Up	Intron (ENSMUST00000027121/ENSMUSG00000025978, intron 8 of 8)	ENSMUSG00000025978	ENSMUST00000181563	Rftn2	raftlin family member 2	2700010E02Rik|3222401M22Rik
1_55233184_55233482	299	1_55233184_55233482	-	23	0	7.83864	2.27396e-07	4.21299e-07	Up	Intron (ENSMUST00000181563/ENSMUSG00000097649, intron 2 of 2)	ENSMUSG00000097649	ENSMUST00000061334	Gm10561	-	-
1_55234552_55235055	504	-	1_55234552_55235055	0	43	-8.17707	4.08541e-09	1.01592e-08	Down	Exon (ENSMUST00000181563/ENSMUSG00000097649, exon 3 of 3)	ENSMUSG00000097649	ENSMUST00000061334	Gm10561	-	-
1_55236490_55238390	1901	1_55236641_55237079	1_55236490_55238390	44	209	-1.6827	4.17049e-08	8.57422e-08	Down	Promoter (<=1kb)	ENSMUSG00000046994	ENSMUST00000061334	Mars2	methionine-tRNA synthetase 2 (mitochondrial)	C730026E21Rik|MetRS
1_55239014_55239265	252	1_55239014_55239265	-	33	0	8.35756	2.45934e-10	8.02848e-10	Up	3' UTR	ENSMUSG00000046994	ENSMUST00000061334	Mars2	methionine-tRNA synthetase 2 (mitochondrial)	C730026E21Rik|MetRS
1_55241357_55241750	394	1_55241357_55241750	-	42	0	8.70454	1.17118e-12	7.07889e-12	Up	3' UTR	ENSMUSG00000046994	ENSMUST00000061334	Mars2	methionine-tRNA synthetase 2 (mitochondrial)	C730026E21Rik|MetRS
1_55260254_55260714	461	1_55260254_55260714	-	37	0	8.52215	1.63617e-11	7.0045e-11	Up	Intron (ENSMUST00000161810/ENSMUSG00000025977, intron 1 of 2)	ENSMUSG00000025977	ENSMUST00000061334	Boll	boule homolog, RNA binding protein	4930554P13Rik|4930597B14Rik
1_55362224_55363379	1156	-	1_55362224_55363379	0	161	-10.0781	3.39675e-26	4.30553e-24	Down	Promoter (<=1kb)	ENSMUSG00000025977	ENSMUST00000114423	Boll	boule homolog, RNA binding protein	4930554P13Rik|4930597B14Rik
1_55378027_55378549	523	1_55378027_55378549	-	45	0	8.80385	1.49345e-13	1.11491e-12	Up	Downstream (2-3kb)	ENSMUSG00000101085	ENSMUST00000188319	Gm8531	-	-
1_55668775_55669126	352	-	1_55668775_55669126	0	28	-7.56082	4.812e-06	7.49864e-06	Down	Intron (ENSMUST00000042986/ENSMUSG00000038349, intron 1 of 5)	ENSMUSG00000038349	ENSMUST00000187059	Plcl1	phospholipase C-like 1	C230017K02Rik|PLC-L|PLC-L1|PLCE|PLCL|PLDL1|PRIP|PRIP-1
1_55700156_55700466	311	-	1_55700156_55700466	0	26	-7.4545	1.47851e-05	2.21227e-05	Down	Promoter (1-2kb)	ENSMUSG00000038349	ENSMUST00000187059	Plcl1	phospholipase C-like 1	C230017K02Rik|PLC-L|PLC-L1|PLCE|PLCL|PLDL1|PRIP|PRIP-1
1_55900233_55900664	432	1_55900233_55900664	-	49	0	8.92644	1.20778e-14	1.17285e-13	Up	Distal Intergenic	ENSMUSG00000099950	ENSMUST00000189293	9130227L01Rik	RIKEN cDNA 9130227L01 gene	-
1_55903398_55903731	334	-	1_55903398_55903731	0	28	-7.56082	4.812e-06	7.49864e-06	Down	Distal Intergenic	ENSMUSG00000099950	ENSMUST00000189293	9130227L01Rik	RIKEN cDNA 9130227L01 gene	-
1_56668497_56668859	363	-	1_56668497_56668859	0	40	-8.0731	2.01468e-08	4.43681e-08	Down	Distal Intergenic	ENSMUSG00000045336	ENSMUST00000062085	Hsfy2	heat shock transcription factor, Y-linked 2	4933413G11Rik|Hspy2l
1_56683806_56685439	1634	-	1_56683806_56685439	0	156	-10.0326	1.36534e-25	1.58789e-23	Down	Distal Intergenic	ENSMUSG00000045336	ENSMUST00000062085	Hsfy2	heat shock transcription factor, Y-linked 2	4933413G11Rik|Hspy2l
1_56685638_56685957	320	-	1_56685638_56685957	0	21	-7.14833	1.54285e-05	2.29874e-05	Down	Distal Intergenic	ENSMUSG00000045336	ENSMUST00000062085	Hsfy2	heat shock transcription factor, Y-linked 2	4933413G11Rik|Hspy2l
1_56833770_56834198	429	-	1_56833770_56834198	0	55	-8.53107	2.34568e-11	9.9103e-11	Down	Intron (ENSMUST00000042857/ENSMUSG00000038331, intron 2 of 9)	ENSMUSG00000038331	ENSMUST00000176759	Satb2	special AT-rich sequence binding protein 2	mKIAA1034
1_56972859_56973335	477	-	1_56972859_56973335	0	45	-8.24243	2.41201e-09	6.33597e-09	Down	Exon (ENSMUST00000195462/ENSMUSG00000087022, exon 1 of 1)	ENSMUSG00000087022	ENSMUST00000195462	Gm38484	predicted gene, 38484	-
1_57377244_57377482	239	1_57377244_57377482	-	27	0	8.06903	1.24618e-08	2.79243e-08	Up	Promoter (<=1kb)	ENSMUSG00000038323	ENSMUST00000042734	1700066M21Rik	RIKEN cDNA 1700066M21 gene	AI428479
1_57377742_57378288	547	-	1_57377742_57378288	0	52	-8.45038	1.07531e-10	3.97431e-10	Down	Promoter (<=1kb)	ENSMUSG00000038323	ENSMUST00000187255	1700066M21Rik	RIKEN cDNA 1700066M21 gene	AI428479
1_57405371_57407562	2192	1_57405852_57407043	1_57405371_57407562	173	546	-1.09473	5.34901e-06	8.3271e-06	Down	Promoter (<=1kb)	ENSMUSG00000025971	ENSMUST00000027114	Maip1	matrix AAA peptidase interacting protein 1	9430016H08Rik|AA409999|C78988
1_57600064_57600315	252	1_57600064_57600315	-	28	0	8.12131	7.04361e-09	1.66011e-08	Up	Distal Intergenic	ENSMUSG00000101151	ENSMUST00000186851	Gm17929	-	-
1_57774260_57774873	614	-	1_57774260_57774873	0	72	-8.91872	2.53516e-14	2.39785e-13	Down	Promoter (<=1kb)	ENSMUSG00000038305	ENSMUST00000172068	Spats2l	spermatogenesis associated, serine-rich 2-like	2810022L02Rik|A230104H11Rik|AA987173|AI480531|AI842453|AW413586
1_57842351_57842754	404	1_57842351_57842754	-	36	0	8.48273	4.79413e-11	1.90587e-10	Up	Intron (ENSMUST00000172287/ENSMUSG00000038305, intron 3 of 6)	ENSMUSG00000038305	ENSMUST00000169772	Spats2l	spermatogenesis associated, serine-rich 2-like	2810022L02Rik|A230104H11Rik|AA987173|AI480531|AI842453|AW413586
1_57849675_57850207	533	-	1_57849675_57850207	0	40	-8.0731	2.01468e-08	4.43681e-08	Down	Intron (ENSMUST00000172287/ENSMUSG00000038305, intron 3 of 6)	ENSMUSG00000038305	ENSMUST00000169772	Spats2l	spermatogenesis associated, serine-rich 2-like	2810022L02Rik|A230104H11Rik|AA987173|AI480531|AI842453|AW413586
1_57868642_57868880	239	1_57868642_57868880	-	30	0	8.2205	1.29729e-09	3.54454e-09	Up	Intron (ENSMUST00000172287/ENSMUSG00000038305, intron 4 of 6)	ENSMUSG00000038305	ENSMUST00000169772	Spats2l	spermatogenesis associated, serine-rich 2-like	2810022L02Rik|A230104H11Rik|AA987173|AI480531|AI842453|AW413586
1_57883791_57884144	354	1_57883791_57884144	-	27	0	8.06903	1.24618e-08	2.79243e-08	Up	Intron (ENSMUST00000172287/ENSMUSG00000038305, intron 6 of 6)	ENSMUSG00000038305	ENSMUST00000164353	Spats2l	spermatogenesis associated, serine-rich 2-like	2810022L02Rik|A230104H11Rik|AA987173|AI480531|AI842453|AW413586
1_57884578_57885131	554	1_57884578_57885131	-	66	0	9.35536	9.40652e-19	2.53261e-17	Up	Intron (ENSMUST00000172287/ENSMUSG00000038305, intron 6 of 6)	ENSMUSG00000038305	ENSMUST00000164353	Spats2l	spermatogenesis associated, serine-rich 2-like	2810022L02Rik|A230104H11Rik|AA987173|AI480531|AI842453|AW413586
1_57885745_57886719	975	1_57885745_57886613	1_57886365_57886719	67	36	1.45533	6.13151e-05	8.87353e-05	Up	5' UTR	ENSMUSG00000038305	ENSMUST00000164353	Spats2l	spermatogenesis associated, serine-rich 2-like	2810022L02Rik|A230104H11Rik|AA987173|AI480531|AI842453|AW413586
1_57893712_57894072	361	1_57893712_57894072	-	23	0	7.83864	2.27396e-07	4.21299e-07	Up	Intron (ENSMUST00000172068/ENSMUSG00000038305, intron 7 of 8)	ENSMUSG00000038305	ENSMUST00000164353	Spats2l	spermatogenesis associated, serine-rich 2-like	2810022L02Rik|A230104H11Rik|AA987173|AI480531|AI842453|AW413586
1_57925846_57926084	239	1_57925846_57926084	-	23	0	7.83864	2.27396e-07	4.21299e-07	Up	Intron (ENSMUST00000163239/ENSMUSG00000038305, intron 8 of 11)	ENSMUSG00000038305	ENSMUST00000172128	Spats2l	spermatogenesis associated, serine-rich 2-like	2810022L02Rik|A230104H11Rik|AA987173|AI480531|AI842453|AW413586
1_57946955_57947200	246	1_57946955_57947200	-	30	0	8.2205	1.29729e-09	3.54454e-09	Up	3' UTR	ENSMUSG00000054770	ENSMUST00000163006	Kctd18	potassium channel tetramerisation domain containing 18	4932411A20Rik|6530404F10Rik
1_57947485_57947756	272	1_57947485_57947756	-	24	0	7.89978	7.04324e-08	1.37487e-07	Up	3' UTR	ENSMUSG00000054770	ENSMUST00000163006	Kctd18	potassium channel tetramerisation domain containing 18	4932411A20Rik|6530404F10Rik
1_57947894_57948815	922	1_57947914_57948209;1_57948406_57948815	1_57947894_57948415	75	36	1.61783	5.13558e-06	7.99816e-06	Up	3' UTR	ENSMUSG00000054770	ENSMUST00000163006	Kctd18	potassium channel tetramerisation domain containing 18	4932411A20Rik|6530404F10Rik
1_58045134_58045372	239	1_58045134_58045372	-	17	0	7.40477	8.35118e-06	1.282e-05	Up	Intron (ENSMUST00000001027/ENSMUSG00000063558, intron 3 of 34)	ENSMUSG00000063558	ENSMUST00000160168	Aox1	aldehyde oxidase 1	AI196512|AI255253|Ao|Aox-1|Aox-2|Aox2|Moro|Ro
1_58136244_58136554	311	1_58136244_58136554	-	28	0	8.12131	7.04361e-09	1.66011e-08	Up	Intron (ENSMUST00000040999/ENSMUSG00000064294, intron 7 of 34)	ENSMUSG00000064294	ENSMUST00000158650	Aox3	aldehyde oxidase 3	1200011D03Rik|AI326299|Aoh1|Aoh2
1_58178317_58178649	333	1_58178317_58178649	-	27	0	8.06903	1.24618e-08	2.79243e-08	Up	Intron (ENSMUST00000040999/ENSMUSG00000064294, intron 28 of 34)	ENSMUSG00000064294	ENSMUST00000160815	Aox3	aldehyde oxidase 3	1200011D03Rik|AI326299|Aoh1|Aoh2
1_58188036_58188408	373	1_58188036_58188408	-	32	0	8.31331	4.26767e-10	1.30949e-09	Up	Exon (ENSMUST00000040999/ENSMUSG00000064294, exon 33 of 35)	ENSMUSG00000064294	ENSMUST00000160815	Aox3	aldehyde oxidase 3	1200011D03Rik|AI326299|Aoh1|Aoh2
1_58393685_58394337	653	-	1_58393685_58394337	0	94	-9.30268	4.6561e-18	1.08333e-16	Down	Promoter (<=1kb)	ENSMUSG00000051223	ENSMUST00000186949	Bzw1	basic leucine zipper and W2 domains 1	1200015E15Rik|mKIAA0005
1_58418706_58419020	315	-	1_58418706_58419020	0	26	-7.4545	1.47851e-05	2.21227e-05	Down	Promoter (1-2kb)	ENSMUSG00000026034	ENSMUST00000131051	Clk1	CDC-like kinase 1	STY
1_58420967_58421232	266	1_58420967_58421232	-	19	0	7.56433	1.3552e-06	2.2703e-06	Up	Promoter (<=1kb)	ENSMUSG00000026034	ENSMUST00000135380	Clk1	CDC-like kinase 1	STY
1_58429352_58429664	313	1_58429352_58429664	-	31	0	8.26765	7.42892e-10	2.14936e-09	Up	Downstream (1-2kb)	ENSMUSG00000026035	ENSMUST00000186242	Ppil3	peptidylprolyl isomerase (cyclophilin)-like 3	2310076N22Rik|2510026K04Rik|Cyp10l
1_58444700_58446721	2022	1_58445673_58446458	1_58444700_58446721	90	372	-1.48331	1.66132e-08	3.71709e-08	Down	Promoter (<=1kb)	ENSMUSG00000026035	ENSMUST00000117069	Ppil3	peptidylprolyl isomerase (cyclophilin)-like 3	2310076N22Rik|2510026K04Rik|Cyp10l
1_58457901_58458200	300	1_58457901_58458200	-	30	0	8.2205	1.29729e-09	3.54454e-09	Up	Promoter (<=1kb)	ENSMUSG00000026036	ENSMUST00000188295	Nif3l1	Ngg1 interacting factor 3-like 1 (S. pombe)	1110030G24Rik
1_58570821_58571148	328	1_58570821_58571148	-	33	0	8.35756	2.45934e-10	8.02848e-10	Up	Intron (ENSMUST00000161600/ENSMUSG00000038174, intron 11 of 11)	ENSMUSG00000038174	ENSMUST00000187717	Fam126b	family with sequence similarity 126, member B	C130065N10Rik|D1Ertd53e|D630010C10
1_58617699_58618167	469	-	1_58617699_58618167	0	30	-7.65985	1.5797e-06	2.60196e-06	Down	Distal Intergenic	ENSMUSG00000100202	ENSMUST00000191562	Gm29389	-	-
1_58622701_58623318	618	-	1_58622701_58623318	0	52	-8.45038	1.07531e-10	3.97431e-10	Down	Downstream (1-2kb)	ENSMUSG00000100202	ENSMUST00000191562	Gm29389	-	-
1_58627315_58627703	389	-	1_58627315_58627703	0	35	-7.88122	1.75007e-07	3.29918e-07	Down	Distal Intergenic	ENSMUSG00000100202	ENSMUST00000191562	Gm29389	-	-
1_58630292_58630649	358	-	1_58630292_58630649	0	29	-7.61119	2.75402e-06	4.40215e-06	Down	Promoter (<=1kb)	ENSMUSG00000099490	ENSMUST00000186270	Gm18802	-	-
1_58722127_58722609	483	1_58722127_58722609	-	56	0	9.11872	2.45896e-16	3.62401e-15	Up	Exon (ENSMUST00000123553/ENSMUSG00000026031, exon 2 of 2)	ENSMUSG00000026031	ENSMUST00000123032	Cflar	CASP8 and FADD-like apoptosis regulator	2310024N18Rik|A430105C05Rik|CLARP|Cash|Casper|FLAME|FLAME-1|Flip|Gm9845|I-FLICE|MRIT|c-Flip
1_58723493_58724405	913	1_58723493_58724405	1_58723982_58724356	72	30	1.82086	8.15832e-07	1.41882e-06	Up	Intron (ENSMUST00000140940/ENSMUSG00000026031, intron 2 of 9)	ENSMUSG00000026031	ENSMUST00000123032	Cflar	CASP8 and FADD-like apoptosis regulator	2310024N18Rik|A430105C05Rik|CLARP|Cash|Casper|FLAME|FLAME-1|Flip|Gm9845|I-FLICE|MRIT|c-Flip
1_58727373_58727789	417	1_58727373_58727789	-	36	0	8.48273	4.79413e-11	1.90587e-10	Up	Intron (ENSMUST00000140940/ENSMUSG00000026031, intron 3 of 9)	ENSMUSG00000026031	ENSMUST00000123032	Cflar	CASP8 and FADD-like apoptosis regulator	2310024N18Rik|A430105C05Rik|CLARP|Cash|Casper|FLAME|FLAME-1|Flip|Gm9845|I-FLICE|MRIT|c-Flip
1_58747314_58747552	239	1_58747314_58747552	-	23	0	7.83864	2.27396e-07	4.21299e-07	Up	Intron (ENSMUST00000140940/ENSMUSG00000026031, intron 8 of 9)	ENSMUSG00000026031	ENSMUST00000123032	Cflar	CASP8 and FADD-like apoptosis regulator	2310024N18Rik|A430105C05Rik|CLARP|Cash|Casper|FLAME|FLAME-1|Flip|Gm9845|I-FLICE|MRIT|c-Flip
1_58769474_58770108	635	-	1_58769474_58770108	0	56	-8.557	1.41877e-11	6.40067e-11	Down	Distal Intergenic	ENSMUSG00000100236	ENSMUST00000191399	Gm3841	-	-
1_58901116_58901354	239	1_58901116_58901354	-	38	0	8.56052	9.60067e-12	4.38615e-11	Up	3' UTR	ENSMUSG00000026028	ENSMUST00000172685	Trak2	trafficking protein, kinesin binding 2	2900022D04Rik|4733401O11Rik|AI480836|AW046271|Als2cr3|CALS-C|GRIF-1|GRIF1|OIP98|mKIAA0549
1_58901697_58902074	378	1_58901697_58902074	-	45	0	8.80385	1.49345e-13	1.11491e-12	Up	3' UTR	ENSMUSG00000026028	ENSMUST00000172685	Trak2	trafficking protein, kinesin binding 2	2900022D04Rik|4733401O11Rik|AI480836|AW046271|Als2cr3|CALS-C|GRIF-1|GRIF1|OIP98|mKIAA0549
1_58902612_58903266	655	-	1_58902612_58903266	0	55	-8.53107	2.34568e-11	9.9103e-11	Down	3' UTR	ENSMUSG00000026028	ENSMUST00000172685	Trak2	trafficking protein, kinesin binding 2	2900022D04Rik|4733401O11Rik|AI480836|AW046271|Als2cr3|CALS-C|GRIF-1|GRIF1|OIP98|mKIAA0549
1_58903485_58904094	610	1_58903485_58904094	1_58903744_58904069	49	19	1.92143	5.7756e-06	8.98429e-06	Up	3' UTR	ENSMUSG00000026028	ENSMUST00000172685	Trak2	trafficking protein, kinesin binding 2	2900022D04Rik|4733401O11Rik|AI480836|AW046271|Als2cr3|CALS-C|GRIF-1|GRIF1|OIP98|mKIAA0549
1_58953362_58954343	982	1_58953362_58954343	-	68	0	9.39837	3.83289e-19	1.14217e-17	Up	Intron (ENSMUST00000027186/ENSMUSG00000026028, intron 15 of 15)	ENSMUSG00000026028	ENSMUST00000174120	Trak2	trafficking protein, kinesin binding 2	2900022D04Rik|4733401O11Rik|AI480836|AW046271|Als2cr3|CALS-C|GRIF-1|GRIF1|OIP98|mKIAA0549
1_58965574_58965933	360	1_58965574_58965933	-	21	0	7.708	4.1078e-07	7.32295e-07	Up	Intron (ENSMUST00000027186/ENSMUSG00000026028, intron 15 of 15)	ENSMUSG00000026028	ENSMUST00000123965	Trak2	trafficking protein, kinesin binding 2	2900022D04Rik|4733401O11Rik|AI480836|AW046271|Als2cr3|CALS-C|GRIF-1|GRIF1|OIP98|mKIAA0549
1_58969894_58970339	446	1_58969894_58970339	-	42	0	8.70454	1.17118e-12	7.07889e-12	Up	Intron (ENSMUST00000027186/ENSMUSG00000026028, intron 15 of 15)	ENSMUSG00000026028	ENSMUST00000123965	Trak2	trafficking protein, kinesin binding 2	2900022D04Rik|4733401O11Rik|AI480836|AW046271|Als2cr3|CALS-C|GRIF-1|GRIF1|OIP98|mKIAA0549
1_59007636_59008140	505	-	1_59007636_59008140	0	47	-8.30497	8.46962e-10	2.41856e-09	Down	Promoter (1-2kb)	ENSMUSG00000047383	ENSMUST00000054653	Als2cr11b	-	-
1_59119843_59120645	803	-	1_59119843_59120645	0	109	-9.51596	4.78503e-19	1.39846e-17	Down	Promoter (<=1kb)	ENSMUSG00000038079	ENSMUST00000094917	Tmem237	transmembrane protein 237	AI853305|Als2cr4|Gm972
1_59236620_59237328	709	-	1_59236620_59237328	0	102	-9.42034	3.71413e-18	8.74993e-17	Down	Promoter (<=1kb)	ENSMUSG00000026024	ENSMUST00000027178	Als2	alsin Rho guanine nucleotide exchange factor	3222402C23Rik|9430073A21Rik|Als2cr6|Alsin|mKIAA1563
1_59256308_59256546	239	1_59256308_59256546	-	22	0	7.7748	4.1078e-07	7.32295e-07	Up	Promoter (<=1kb)	ENSMUSG00000026023	ENSMUST00000160662	Cdk15	cyclin-dependent kinase 15	Als2cr7|Pftk2
1_59256883_59257213	331	1_59256883_59257213	-	31	0	8.26765	7.42892e-10	2.14936e-09	Up	Promoter (<=1kb)	ENSMUSG00000026023	ENSMUST00000160662	Cdk15	cyclin-dependent kinase 15	Als2cr7|Pftk2
1_59266460_59266840	381	-	1_59266460_59266840	0	26	-7.4545	1.47851e-05	2.21227e-05	Down	Intron (ENSMUST00000160662/ENSMUSG00000026023, intron 4 of 13)	ENSMUSG00000026023	ENSMUST00000162487	Cdk15	cyclin-dependent kinase 15	Als2cr7|Pftk2
1_59315035_59315692	658	1_59315035_59315692	-	74	0	9.52018	1.76288e-20	6.96056e-19	Up	Intron (ENSMUST00000160662/ENSMUSG00000026023, intron 10 of 13)	ENSMUSG00000026023	ENSMUST00000162906	Cdk15	cyclin-dependent kinase 15	Als2cr7|Pftk2
1_59322099_59322360	262	1_59322099_59322360	-	26	0	8.01479	2.21221e-08	4.74092e-08	Up	Intron (ENSMUST00000160662/ENSMUSG00000026023, intron 10 of 13)	ENSMUSG00000026023	ENSMUST00000162906	Cdk15	cyclin-dependent kinase 15	Als2cr7|Pftk2
1_59322637_59323101	465	-	1_59322637_59323101	0	47	-8.30497	8.46962e-10	2.41856e-09	Down	Intron (ENSMUST00000160662/ENSMUSG00000026023, intron 10 of 13)	ENSMUSG00000026023	ENSMUST00000162906	Cdk15	cyclin-dependent kinase 15	Als2cr7|Pftk2
1_59325239_59325692	454	-	1_59325239_59325692	0	29	-7.61119	2.75402e-06	4.40215e-06	Down	Intron (ENSMUST00000160662/ENSMUSG00000026023, intron 10 of 13)	ENSMUSG00000026023	ENSMUST00000162906	Cdk15	cyclin-dependent kinase 15	Als2cr7|Pftk2
1_59376851_59377185	335	-	1_59376851_59377185	0	36	-7.9217	1.01568e-07	1.94955e-07	Down	Promoter (1-2kb)	ENSMUSG00000099922	ENSMUST00000187523	Gm29016	-	-
1_59390387_59390774	388	1_59390387_59390774	-	43	0	8.73841	4.15962e-13	2.73662e-12	Up	Intron (ENSMUST00000187523/ENSMUSG00000099922, intron 3 of 3)	ENSMUSG00000099922	ENSMUST00000187523	Gm29016	-	-
1_59414393_59414631	239	1_59414393_59414631	-	31	0	8.26765	7.42892e-10	2.14936e-09	Up	Distal Intergenic	ENSMUSG00000104502	ENSMUST00000195013	Gm37737	-	-
1_59423586_59424211	626	1_59423638_59424211	1_59423586_59423966	63	46	1.01431	0.00460209	0.00612565	Up	Distal Intergenic	ENSMUSG00000104502	ENSMUST00000195013	Gm37737	-	-
1_59427157_59427547	391	1_59427157_59427547	-	47	0	8.86645	5.41924e-14	4.56184e-13	Up	Distal Intergenic	ENSMUSG00000104502	ENSMUST00000195013	Gm37737	-	-
1_59448023_59448582	560	-	1_59448023_59448582	0	40	-8.0731	2.01468e-08	4.43681e-08	Down	Exon (ENSMUST00000195013/ENSMUSG00000104502, exon 1 of 1)	ENSMUSG00000104502	ENSMUST00000195013	Gm37737	-	-
1_59450994_59451232	239	1_59450994_59451232	-	31	0	8.26765	7.42892e-10	2.14936e-09	Up	Promoter (1-2kb)	ENSMUSG00000104502	ENSMUST00000195013	Gm37737	-	-
1_59466477_59466800	324	-	1_59466477_59466800	0	30	-7.65985	1.5797e-06	2.60196e-06	Down	Distal Intergenic	ENSMUSG00000041075	ENSMUST00000114246	Fzd7	frizzled class receptor 7	Fz7
1_59468370_59471135	2766	1_59468602_59469213	1_59468370_59471135	57	230	-1.44803	6.72977e-07	1.1777e-06	Down	Distal Intergenic	ENSMUSG00000041075	ENSMUST00000114246	Fzd7	frizzled class receptor 7	Fz7
1_59471882_59472891	1010	1_59472241_59472528	1_59471882_59472891	42	165	-1.40889	7.78714e-06	1.20732e-05	Down	Distal Intergenic	ENSMUSG00000041075	ENSMUST00000114246	Fzd7	frizzled class receptor 7	Fz7
1_59474724_59475219	496	-	1_59474724_59475219	0	36	-7.9217	1.01568e-07	1.94955e-07	Down	Distal Intergenic	ENSMUSG00000041075	ENSMUST00000114246	Fzd7	frizzled class receptor 7	Fz7
1_59475934_59476180	247	1_59475934_59476180	-	24	0	7.89978	7.04324e-08	1.37487e-07	Up	Distal Intergenic	ENSMUSG00000041075	ENSMUST00000114246	Fzd7	frizzled class receptor 7	Fz7
1_59476699_59477043	345	-	1_59476699_59477043	0	31	-7.70693	9.08175e-07	1.53104e-06	Down	Distal Intergenic	ENSMUSG00000041075	ENSMUST00000114246	Fzd7	frizzled class receptor 7	Fz7
1_59478089_59478594	506	-	1_59478089_59478594	0	32	-7.75251	9.08175e-07	1.53104e-06	Down	Distal Intergenic	ENSMUSG00000041075	ENSMUST00000114246	Fzd7	frizzled class receptor 7	Fz7
1_59517651_59517942	292	1_59517651_59517942	-	24	0	7.89978	7.04324e-08	1.37487e-07	Up	Intron (ENSMUST00000114243/ENSMUSG00000047361, intron 1 of 19)	ENSMUSG00000047361	ENSMUST00000114243	Gm973	predicted gene 973	AW554518
1_59518946_59519564	619	-	1_59518946_59519564	0	38	-7.99939	5.909e-08	1.17873e-07	Down	Intron (ENSMUST00000114243/ENSMUSG00000047361, intron 1 of 19)	ENSMUSG00000047361	ENSMUST00000114243	Gm973	predicted gene 973	AW554518
1_59519878_59520244	367	1_59519878_59520244	-	26	0	8.01479	2.21221e-08	4.74092e-08	Up	Intron (ENSMUST00000114243/ENSMUSG00000047361, intron 1 of 19)	ENSMUSG00000047361	ENSMUST00000114243	Gm973	predicted gene 973	AW554518
1_59523623_59523999	377	-	1_59523623_59523999	0	30	-7.65985	1.5797e-06	2.60196e-06	Down	Promoter (<=1kb)	ENSMUSG00000047361	ENSMUST00000186434	Gm973	predicted gene 973	AW554518
1_59524187_59524615	429	1_59524187_59524615	-	38	0	8.56052	9.60067e-12	4.38615e-11	Up	Promoter (<=1kb)	ENSMUSG00000047361	ENSMUST00000186434	Gm973	predicted gene 973	AW554518
1_59549036_59549322	287	1_59549036_59549322	-	32	0	8.31331	4.26767e-10	1.30949e-09	Up	Promoter (<=1kb)	ENSMUSG00000099811	ENSMUST00000189864	Gm28411	-	-
1_59578109_59578464	356	1_59578109_59578464	-	29	0	8.17176	3.99443e-09	1.00658e-08	Up	Intron (ENSMUST00000114243/ENSMUSG00000047361, intron 11 of 19)	ENSMUSG00000047361	ENSMUST00000187979	Gm973	predicted gene 973	AW554518
1_59651620_59651901	282	1_59651620_59651901	-	35	0	8.4422	8.24314e-11	3.08621e-10	Up	Intron (ENSMUST00000191158/ENSMUSG00000026021, intron 2 of 3)	ENSMUSG00000026021	ENSMUST00000192922	Sumo1	small ubiquitin-like modifier 1	GMP1|PIC1|SENTRIN|SMT3|SMT3H3|SMTP3|SUMO-1|Smt3C|Ubl1
1_59661331_59661582	252	1_59661331_59661582	-	22	0	7.7748	4.1078e-07	7.32295e-07	Up	Intron (ENSMUST00000191158/ENSMUSG00000026021, intron 3 of 3)	ENSMUSG00000026021	ENSMUST00000185265	Sumo1	small ubiquitin-like modifier 1	GMP1|PIC1|SENTRIN|SMT3|SMT3H3|SMTP3|SUMO-1|Smt3C|Ubl1
1_59662827_59663137	311	-	1_59662827_59663137	0	28	-7.56082	4.812e-06	7.49864e-06	Down	Intron (ENSMUST00000191158/ENSMUSG00000026021, intron 3 of 3)	ENSMUSG00000026021	ENSMUST00000185265	Sumo1	small ubiquitin-like modifier 1	GMP1|PIC1|SENTRIN|SMT3|SMT3H3|SMTP3|SUMO-1|Smt3C|Ubl1
1_59664304_59664685	382	1_59664304_59664685	-	39	0	8.59789	5.64977e-12	2.78967e-11	Up	Intron (ENSMUST00000191158/ENSMUSG00000026021, intron 3 of 3)	ENSMUSG00000026021	ENSMUST00000185265	Sumo1	small ubiquitin-like modifier 1	GMP1|PIC1|SENTRIN|SMT3|SMT3H3|SMTP3|SUMO-1|Smt3C|Ubl1
1_59664882_59665434	553	1_59664882_59665434	-	28	0	8.12131	7.04361e-09	1.66011e-08	Up	Intron (ENSMUST00000191158/ENSMUSG00000026021, intron 3 of 3)	ENSMUSG00000026021	ENSMUST00000185265	Sumo1	small ubiquitin-like modifier 1	GMP1|PIC1|SENTRIN|SMT3|SMT3H3|SMTP3|SUMO-1|Smt3C|Ubl1
1_59665550_59666010	461	-	1_59665550_59666010	0	23	-7.27869	4.53786e-06	7.16963e-06	Down	Intron (ENSMUST00000191158/ENSMUSG00000026021, intron 3 of 3)	ENSMUSG00000026021	ENSMUST00000185265	Sumo1	small ubiquitin-like modifier 1	GMP1|PIC1|SENTRIN|SMT3|SMT3H3|SMTP3|SUMO-1|Smt3C|Ubl1
1_59667153_59667452	300	1_59667153_59667452	-	31	0	8.26765	7.42892e-10	2.14936e-09	Up	Intron (ENSMUST00000191158/ENSMUSG00000026021, intron 3 of 3)	ENSMUSG00000026021	ENSMUST00000185265	Sumo1	small ubiquitin-like modifier 1	GMP1|PIC1|SENTRIN|SMT3|SMT3H3|SMTP3|SUMO-1|Smt3C|Ubl1
1_59667781_59668156	376	1_59667781_59668156	-	38	0	8.56052	9.60067e-12	4.38615e-11	Up	Intron (ENSMUST00000191158/ENSMUSG00000026021, intron 3 of 3)	ENSMUSG00000026021	ENSMUST00000185265	Sumo1	small ubiquitin-like modifier 1	GMP1|PIC1|SENTRIN|SMT3|SMT3H3|SMTP3|SUMO-1|Smt3C|Ubl1
1_59673920_59674158	239	1_59673920_59674158	-	20	0	7.63795	7.44748e-07	1.2962e-06	Up	Downstream (<1kb)	ENSMUSG00000101400	ENSMUST00000185710	Gm29596	-	-
1_59674292_59674713	422	-	1_59674292_59674713	0	26	-7.4545	1.47851e-05	2.21227e-05	Down	Downstream (<1kb)	ENSMUSG00000101400	ENSMUST00000185710	Gm29596	-	-
1_59687711_59688497	787	-	1_59687711_59688497	0	66	-8.79346	2.7628e-13	1.91851e-12	Down	Promoter (1-2kb)	ENSMUSG00000026020	ENSMUST00000190759	Nop58	NOP58 ribonucleoprotein	MSSP|Nol5|SIK|nop5
1_59764559_59764934	376	-	1_59764559_59764934	0	42	-8.14324	6.93678e-09	1.66011e-08	Down	5' UTR	ENSMUSG00000067336	ENSMUST00000087435	Bmpr2	bone morphogenetic protein receptor, type II (serine/threonine kinase)	2610024H22Rik|AL117858|AW546137|BB189135|BMP-2|BMPR-2|BMPR-II|BMPRII|BRK-3|Gm20272
1_59907034_59907630	597	-	1_59907034_59907630	0	62	-8.70347	1.18945e-12	7.10233e-12	Down	Distal Intergenic	ENSMUSG00000041040	ENSMUST00000036540	Fam117b	family with sequence similarity 117, member B	2810425F24Rik|6330416D14Rik|Als2cr13
1_59913713_59914149	437	-	1_59913713_59914149	0	35	-7.88122	1.75007e-07	3.29918e-07	Down	Exon (ENSMUST00000036540/ENSMUSG00000041040, exon 1 of 8)	ENSMUSG00000041040	ENSMUST00000036540	Fam117b	family with sequence similarity 117, member B	2810425F24Rik|6330416D14Rik|Als2cr13
1_59969709_59969972	264	1_59969709_59969972	-	24	0	7.89978	7.04324e-08	1.37487e-07	Up	Promoter (<=1kb)	ENSMUSG00000041040	ENSMUST00000151630	Fam117b	family with sequence similarity 117, member B	2810425F24Rik|6330416D14Rik|Als2cr13
1_60094753_60095205	453	-	1_60094753_60095205	0	30	-7.65985	1.5797e-06	2.60196e-06	Down	Intron (ENSMUST00000027173/ENSMUSG00000026019, intron 12 of 12)	ENSMUSG00000026019	ENSMUST00000133767	Wdr12	WD repeat domain 12	4933402C23Rik|Ytm1|Ytm1p
1_60097073_60098655	1583	1_60097670_60098486	1_60097073_60098655	115	456	-1.42365	1.96037e-08	4.38173e-08	Down	Promoter (<=1kb)	ENSMUSG00000026017	ENSMUST00000130075	Carf	calcium response factor	Als2cr8|ECBRC-FC1|ECBRC-FC2
1_60179327_60180362	1036	1_60180018_60180286	1_60179327_60180362	36	121	-1.18372	0.000424834	0.000596043	Down	Promoter (<=1kb)	ENSMUSG00000073664	ENSMUST00000160834	Nbeal1	neurobeachin like 1	2310076G13Rik|A530050O19Rik|A530083I02Rik|AI662228|ALS2CR17
1_60180848_60182122	1275	-	1_60180848_60182122	0	159	-10.06	6.79381e-26	8.17826e-24	Down	Promoter (<=1kb)	ENSMUSG00000073664	ENSMUST00000187195	Nbeal1	neurobeachin like 1	2310076G13Rik|A530050O19Rik|A530083I02Rik|AI662228|ALS2CR17
1_60198134_60198372	239	1_60198134_60198372	-	27	0	8.06903	1.24618e-08	2.79243e-08	Up	Intron (ENSMUST00000160834/ENSMUSG00000073664, intron 4 of 54)	ENSMUSG00000073664	ENSMUST00000187195	Nbeal1	neurobeachin like 1	2310076G13Rik|A530050O19Rik|A530083I02Rik|AI662228|ALS2CR17
1_60352782_60353720	939	1_60352986_60353720	1_60352782_60353131	73	27	1.99194	1.62854e-07	3.11598e-07	Up	Promoter (<=1kb)	ENSMUSG00000103822	ENSMUST00000191764	6030460B20Rik	-	-
1_60355568_60355877	310	1_60355568_60355877	-	25	0	7.95843	3.94049e-08	8.10452e-08	Up	Intron (ENSMUST00000114202/ENSMUSG00000049439, intron 4 of 7)	ENSMUSG00000049439	ENSMUST00000191764	Cyp20a1	cytochrome P450, family 20, subfamily a, polypeptide 1	A930011N14Rik|Cypm
1_60413970_60414268	299	1_60413970_60414268	-	32	0	8.31331	4.26767e-10	1.30949e-09	Up	Intron (ENSMUST00000052332/ENSMUSG00000026782, intron 1 of 8)	ENSMUSG00000026782	ENSMUST00000189649	Abi2	abl-interactor 2	8430425M24Rik|AI839867|C130078H13
1_60416981_60417269	289	1_60416981_60417269	-	30	0	8.2205	1.29729e-09	3.54454e-09	Up	Intron (ENSMUST00000052332/ENSMUSG00000026782, intron 1 of 8)	ENSMUSG00000026782	ENSMUST00000189649	Abi2	abl-interactor 2	8430425M24Rik|AI839867|C130078H13
1_60428470_60428807	338	1_60428470_60428807	-	25	0	7.95843	3.94049e-08	8.10452e-08	Up	Intron (ENSMUST00000052332/ENSMUSG00000026782, intron 1 of 8)	ENSMUSG00000026782	ENSMUST00000185788	Abi2	abl-interactor 2	8430425M24Rik|AI839867|C130078H13
1_60479772_60480120	349	-	1_60479772_60480120	0	33	-7.79671	5.23325e-07	9.17763e-07	Down	3' UTR	ENSMUSG00000026014	ENSMUST00000188511	Raph1	Ras association (RalGDS/AF-6) and pleckstrin homology domains 1	9430025M21Rik|C730009O10Rik|Lpd
1_60493293_60493613	321	-	1_60493293_60493613	0	26	-7.4545	1.47851e-05	2.21227e-05	Down	Exon (ENSMUST00000140485/ENSMUSG00000026014, exon 13 of 14)	ENSMUSG00000026014	ENSMUST00000188511	Raph1	Ras association (RalGDS/AF-6) and pleckstrin homology domains 1	9430025M21Rik|C730009O10Rik|Lpd
1_60508195_60508439	245	1_60508195_60508439	-	22	0	7.7748	4.1078e-07	7.32295e-07	Up	Intron (ENSMUST00000140485/ENSMUSG00000026014, intron 10 of 13)	ENSMUSG00000026014	ENSMUST00000189383	Raph1	Ras association (RalGDS/AF-6) and pleckstrin homology domains 1	9430025M21Rik|C730009O10Rik|Lpd
1_60509612_60509860	249	1_60509612_60509860	-	18	0	7.48675	2.47519e-06	4.01712e-06	Up	Intron (ENSMUST00000140485/ENSMUSG00000026014, intron 10 of 13)	ENSMUSG00000026014	ENSMUST00000189383	Raph1	Ras association (RalGDS/AF-6) and pleckstrin homology domains 1	9430025M21Rik|C730009O10Rik|Lpd
1_60514313_60514716	404	-	1_60514313_60514716	0	29	-7.61119	2.75402e-06	4.40215e-06	Down	Exon (ENSMUST00000127573/ENSMUSG00000026014, exon 1 of 1)	ENSMUSG00000026014	ENSMUST00000127573	Raph1	Ras association (RalGDS/AF-6) and pleckstrin homology domains 1	9430025M21Rik|C730009O10Rik|Lpd
1_60519549_60520091	543	-	1_60519549_60520091	0	42	-8.14324	6.93678e-09	1.66011e-08	Down	Exon (ENSMUST00000127573/ENSMUSG00000026014, exon 1 of 1)	ENSMUSG00000026014	ENSMUST00000127573	Raph1	Ras association (RalGDS/AF-6) and pleckstrin homology domains 1	9430025M21Rik|C730009O10Rik|Lpd
1_60524116_60524485	370	-	1_60524116_60524485	0	24	-7.33971	2.47519e-06	4.01712e-06	Down	Promoter (1-2kb)	ENSMUSG00000081562	ENSMUST00000122243	Gm11575	-	-
1_60531095_60531785	691	-	1_60531095_60531785	0	52	-8.45038	1.07531e-10	3.97431e-10	Down	Intron (ENSMUST00000140485/ENSMUSG00000026014, intron 12 of 13)	ENSMUSG00000026014	ENSMUST00000117433	Raph1	Ras association (RalGDS/AF-6) and pleckstrin homology domains 1	9430025M21Rik|C730009O10Rik|Lpd
1_60533168_60533634	467	1_60533168_60533634	-	42	0	8.70454	1.17118e-12	7.07889e-12	Up	Exon (ENSMUST00000140485/ENSMUSG00000026014, exon 2 of 14)	ENSMUSG00000026014	ENSMUST00000117433	Raph1	Ras association (RalGDS/AF-6) and pleckstrin homology domains 1	9430025M21Rik|C730009O10Rik|Lpd
1_60538746_60539024	279	1_60538746_60539024	-	38	0	8.56052	9.60067e-12	4.38615e-11	Up	Intron (ENSMUST00000140485/ENSMUSG00000026014, intron 13 of 13)	ENSMUSG00000026014	ENSMUST00000117433	Raph1	Ras association (RalGDS/AF-6) and pleckstrin homology domains 1	9430025M21Rik|C730009O10Rik|Lpd
1_60540187_60540719	533	-	1_60540187_60540719	0	43	-8.17707	4.08541e-09	1.01592e-08	Down	Intron (ENSMUST00000140485/ENSMUSG00000026014, intron 13 of 13)	ENSMUSG00000026014	ENSMUST00000117433	Raph1	Ras association (RalGDS/AF-6) and pleckstrin homology domains 1	9430025M21Rik|C730009O10Rik|Lpd
1_60541053_60542395	1343	1_60541401_60541833	1_60541053_60541634;1_60541787_60542395	34	101	-1.00565	0.00498785	0.00662262	Down	Intron (ENSMUST00000140485/ENSMUSG00000026014, intron 13 of 13)	ENSMUSG00000026014	ENSMUST00000117433	Raph1	Ras association (RalGDS/AF-6) and pleckstrin homology domains 1	9430025M21Rik|C730009O10Rik|Lpd
1_60542760_60544382	1623	1_60542760_60544382	-	157	0	10.6043	8.1753e-36	6.32928e-33	Up	Intron (ENSMUST00000140485/ENSMUSG00000026014, intron 13 of 13)	ENSMUSG00000026014	ENSMUST00000117433	Raph1	Ras association (RalGDS/AF-6) and pleckstrin homology domains 1	9430025M21Rik|C730009O10Rik|Lpd
1_60565255_60566749	1495	1_60565255_60566307	1_60565325_60566749	134	415	-1.06736	1.82347e-05	2.71101e-05	Down	5' UTR	ENSMUSG00000026014	ENSMUST00000027168	Raph1	Ras association (RalGDS/AF-6) and pleckstrin homology domains 1	9430025M21Rik|C730009O10Rik|Lpd
1_60588535_60588777	243	1_60588535_60588777	-	36	0	8.48273	4.79413e-11	1.90587e-10	Up	Distal Intergenic	ENSMUSG00000082160	ENSMUST00000118530	Gm11578	-	-
1_60627348_60628231	884	-	1_60627348_60628231	0	73	-8.93858	1.5826e-14	1.51779e-13	Down	Distal Intergenic	ENSMUSG00000088973	ENSMUST00000158348	Gm23762	-	-
1_60646972_60647289	318	1_60646972_60647289	-	31	0	8.26765	7.42892e-10	2.14936e-09	Up	Distal Intergenic	ENSMUSG00000088973	ENSMUST00000158348	Gm23762	-	-
1_60715382_60715742	361	1_60715382_60715742	-	35	0	8.4422	8.24314e-11	3.08621e-10	Up	Promoter (1-2kb)	ENSMUSG00000026012	ENSMUST00000132833	Cd28	CD28 antigen	-
1_60720860_60721655	796	1_60720860_60721570	1_60720992_60721655	87	45	1.51095	5.93593e-06	9.23078e-06	Up	Intron (ENSMUST00000132833/ENSMUSG00000026012, intron 3 of 3)	ENSMUSG00000026012	ENSMUST00000132833	Cd28	CD28 antigen	-
1_60743724_60744056	333	1_60743724_60744056	-	45	0	8.80385	1.49345e-13	1.11491e-12	Up	Intron (ENSMUST00000132833/ENSMUSG00000026012, intron 3 of 3)	ENSMUSG00000026012	ENSMUST00000027165	Cd28	CD28 antigen	-
1_60775536_60776392	857	1_60775536_60776147	1_60776048_60776392	45	25	1.40561	0.00106592	0.00147033	Up	Downstream (<1kb)	ENSMUSG00000085965	ENSMUST00000130082	2310016D23Rik	-	-
1_60778597_60780045	1449	1_60778597_60779163;1_60779436_60780045	1_60779034_60779705	129	59	1.68903	2.23255e-08	4.78413e-08	Up	Promoter (<=1kb)	ENSMUSG00000085965	ENSMUST00000130082	2310016D23Rik	-	-
1_60780532_60782063	1532	1_60780532_60780776;1_60781056_60782063	1_60780562_60781766	121	81	1.14052	0.000101878	0.000146266	Up	Promoter (<=1kb)	ENSMUSG00000086795	ENSMUST00000145502	Gm11579	-	-
1_60796387_60796880	494	1_60796387_60796880	-	42	0	8.70454	1.17118e-12	7.07889e-12	Up	Intron (ENSMUST00000130082/ENSMUSG00000085965, intron 1 of 3)	ENSMUSG00000085965	ENSMUST00000121926	2310016D23Rik	-	-
1_60802258_60802996	739	1_60802258_60802995	1_60802680_60802996	83	33	1.88885	8.55154e-08	1.66785e-07	Up	Intron (ENSMUST00000130082/ENSMUSG00000085965, intron 3 of 3)	ENSMUSG00000085965	ENSMUST00000122024	2310016D23Rik	-	-
1_60807802_60809010	1209	1_60807802_60808164;1_60808425_60809010	1_60808115_60808475	93	34	2.0099	6.90293e-09	1.66011e-08	Up	Promoter (<=1kb)	ENSMUSG00000083355	ENSMUST00000122024	Gm11581	-	-
1_60811057_60811818	762	1_60811057_60811818	1_60811159_60811469	82	31	1.96116	5.80491e-08	1.17873e-07	Up	Downstream (1-2kb)	ENSMUSG00000083355	ENSMUST00000122024	Gm11581	-	-
1_60817420_60817936	517	-	1_60817420_60817936	0	45	-8.24243	2.41201e-09	6.33597e-09	Down	Distal Intergenic	ENSMUSG00000083355	ENSMUST00000122024	Gm11581	-	-
1_60818150_60819344	1195	1_60818394_60819344	1_60818150_60819103	90	51	1.37979	2.1738e-05	3.22712e-05	Up	Distal Intergenic	ENSMUSG00000083355	ENSMUST00000122024	Gm11581	-	-
1_60819489_60819850	362	-	1_60819489_60819850	0	29	-7.61119	2.75402e-06	4.40215e-06	Down	Distal Intergenic	ENSMUSG00000083355	ENSMUST00000122024	Gm11581	-	-
1_60824832_60825097	266	1_60824832_60825097	-	25	0	7.95843	3.94049e-08	8.10452e-08	Up	Distal Intergenic	ENSMUSG00000083355	ENSMUST00000122024	Gm11581	-	-
1_60825600_60825989	390	1_60825600_60825989	-	36	0	8.48273	4.79413e-11	1.90587e-10	Up	Distal Intergenic	ENSMUSG00000083355	ENSMUST00000122024	Gm11581	-	-
1_60827084_60827443	360	1_60827084_60827443	-	45	0	8.80385	1.49345e-13	1.11491e-12	Up	Distal Intergenic	ENSMUSG00000083355	ENSMUST00000122024	Gm11581	-	-
1_60828621_60829345	725	-	1_60828621_60829345	0	43	-8.17707	4.08541e-09	1.01592e-08	Down	Distal Intergenic	ENSMUSG00000083355	ENSMUST00000122024	Gm11581	-	-
1_60835209_60835819	611	1_60835408_60835819	1_60835209_60835555	35	23	1.16351	0.0107729	0.0139821	Up	Distal Intergenic	ENSMUSG00000083355	ENSMUST00000122024	Gm11581	-	-
1_60836142_60836640	499	-	1_60836142_60836640	0	41	-8.1086	1.18072e-08	2.73413e-08	Down	Distal Intergenic	ENSMUSG00000083355	ENSMUST00000122024	Gm11581	-	-
1_60861027_60861737	711	1_60861027_60861737	1_60861118_60861648	71	48	1.12532	0.000902423	0.00124899	Up	Distal Intergenic	ENSMUSG00000102549	ENSMUST00000193735	Gm38137	-	-
1_60863404_60863755	352	-	1_60863404_60863755	0	27	-7.50864	8.426e-06	1.282e-05	Down	Distal Intergenic	ENSMUSG00000102549	ENSMUST00000193735	Gm38137	-	-
1_60866657_60866951	295	1_60866657_60866951	-	20	0	7.63795	7.44748e-07	1.2962e-06	Up	Distal Intergenic	ENSMUSG00000102549	ENSMUST00000193735	Gm38137	-	-
1_60926228_60926537	310	1_60926228_60926537	-	30	0	8.2205	1.29729e-09	3.54454e-09	Up	Distal Intergenic	ENSMUSG00000026011	ENSMUST00000097720	Ctla4	cytotoxic T-lymphocyte-associated protein 4	Cd152|Ctla-4|Ly-56
1_61094607_61095414	808	-	1_61094607_61095414	0	62	-8.70347	1.18945e-12	7.10233e-12	Down	Distal Intergenic	ENSMUSG00000082804	ENSMUST00000119156	Rpl17-ps1	-	-
1_61933144_61933552	409	1_61933144_61933552	-	39	0	8.59789	5.64977e-12	2.78967e-11	Up	Intron (ENSMUST00000138768/ENSMUSG00000052062, intron 2 of 4)	ENSMUSG00000052062	ENSMUST00000187972	Pard3b	par-3 family cell polarity regulator beta	1810008K04Rik|2010002N16Rik|2810455B10Rik|Als2cr19|PAR3B|PAR3L|PAR3beta
1_62171433_62171698	266	1_62171433_62171698	-	25	0	7.95843	3.94049e-08	8.10452e-08	Up	Intron (ENSMUST00000075374/ENSMUSG00000052062, intron 10 of 22)	ENSMUSG00000052062	ENSMUST00000127498	Pard3b	par-3 family cell polarity regulator beta	1810008K04Rik|2010002N16Rik|2810455B10Rik|Als2cr19|PAR3B|PAR3L|PAR3beta
1_62177582_62178173	592	1_62177582_62178173	-	42	0	8.70454	1.17118e-12	7.07889e-12	Up	Intron (ENSMUST00000075374/ENSMUSG00000052062, intron 10 of 22)	ENSMUSG00000052062	ENSMUST00000127498	Pard3b	par-3 family cell polarity regulator beta	1810008K04Rik|2010002N16Rik|2810455B10Rik|Als2cr19|PAR3B|PAR3L|PAR3beta
1_62183570_62184099	530	1_62183570_62184099	-	43	0	8.73841	4.15962e-13	2.73662e-12	Up	Intron (ENSMUST00000075374/ENSMUSG00000052062, intron 10 of 22)	ENSMUSG00000052062	ENSMUST00000127498	Pard3b	par-3 family cell polarity regulator beta	1810008K04Rik|2010002N16Rik|2810455B10Rik|Als2cr19|PAR3B|PAR3L|PAR3beta
1_62185276_62185702	427	1_62185276_62185702	-	44	0	8.7715	2.48909e-13	1.74548e-12	Up	Intron (ENSMUST00000075374/ENSMUSG00000052062, intron 10 of 22)	ENSMUSG00000052062	ENSMUST00000127498	Pard3b	par-3 family cell polarity regulator beta	1810008K04Rik|2010002N16Rik|2810455B10Rik|Als2cr19|PAR3B|PAR3L|PAR3beta
1_62186460_62186772	313	1_62186460_62186772	-	36	0	8.48273	4.79413e-11	1.90587e-10	Up	Intron (ENSMUST00000075374/ENSMUSG00000052062, intron 10 of 22)	ENSMUSG00000052062	ENSMUST00000127498	Pard3b	par-3 family cell polarity regulator beta	1810008K04Rik|2010002N16Rik|2810455B10Rik|Als2cr19|PAR3B|PAR3L|PAR3beta
1_62190324_62190697	374	1_62190324_62190697	-	31	0	8.26765	7.42892e-10	2.14936e-09	Up	Intron (ENSMUST00000075374/ENSMUSG00000052062, intron 10 of 22)	ENSMUSG00000052062	ENSMUST00000127498	Pard3b	par-3 family cell polarity regulator beta	1810008K04Rik|2010002N16Rik|2810455B10Rik|Als2cr19|PAR3B|PAR3L|PAR3beta
1_62201052_62201312	261	1_62201052_62201312	-	34	0	8.4005	1.42164e-10	4.99774e-10	Up	Intron (ENSMUST00000075374/ENSMUSG00000052062, intron 11 of 22)	ENSMUSG00000052062	ENSMUST00000195466	Pard3b	par-3 family cell polarity regulator beta	1810008K04Rik|2010002N16Rik|2810455B10Rik|Als2cr19|PAR3B|PAR3L|PAR3beta
1_62650023_62650556	534	-	1_62650023_62650556	0	34	-7.83958	3.02271e-07	5.50653e-07	Down	Distal Intergenic	ENSMUSG00000081950	ENSMUST00000119592	Gm11600	-	-
1_62746267_62746524	258	1_62746267_62746524	-	30	0	8.2205	1.29729e-09	3.54454e-09	Up	Intron (ENSMUST00000075144/ENSMUSG00000025969, intron 5 of 15)	ENSMUSG00000025969	ENSMUST00000189205	Nrp2	neuropilin 2	1110048P06Rik|Np-2|Np2|Npn-2|Npn2
1_62949477_62950065	589	1_62949477_62949808	1_62949567_62950065	43	30	1.07856	0.00957164	0.0124697	Up	Distal Intergenic	ENSMUSG00000104991	ENSMUST00000199516	Gm44468	-	-
1_62951140_62951654	515	1_62951140_62951654	-	48	0	8.89676	3.27725e-14	2.96107e-13	Up	Distal Intergenic	ENSMUSG00000104991	ENSMUST00000199516	Gm44468	-	-
1_63014108_63014346	239	1_63014108_63014346	-	26	0	8.01479	2.21221e-08	4.74092e-08	Up	Intron (ENSMUST00000133236/ENSMUSG00000040865, intron 4 of 12)	ENSMUSG00000040865	ENSMUST00000199516	Ino80d	INO80 complex subunit D	7330405I11|A430093A21Rik|BC010584
1_63080127_63080419	293	1_63080127_63080419	-	25	0	7.95843	3.94049e-08	8.10452e-08	Up	Intron (ENSMUST00000133236/ENSMUSG00000040865, intron 11 of 12)	ENSMUSG00000040865	ENSMUST00000118179	Ino80d	INO80 complex subunit D	7330405I11|A430093A21Rik|BC010584
1_63098733_63099105	373	1_63098733_63099105	-	31	0	8.26765	7.42892e-10	2.14936e-09	Up	Intron (ENSMUST00000165066/ENSMUSG00000040865, intron 10 of 11)	ENSMUSG00000040865	ENSMUST00000133236	Ino80d	INO80 complex subunit D	7330405I11|A430093A21Rik|BC010584
1_63102766_63103169	404	-	1_63102766_63103169	0	36	-7.9217	1.01568e-07	1.94955e-07	Down	Intron (ENSMUST00000165066/ENSMUSG00000040865, intron 10 of 11)	ENSMUSG00000040865	ENSMUST00000186436	Ino80d	INO80 complex subunit D	7330405I11|A430093A21Rik|BC010584
1_63116170_63116451	282	1_63116170_63116451	-	29	0	8.17176	3.99443e-09	1.00658e-08	Up	Promoter (<=1kb)	ENSMUSG00000101599	ENSMUST00000185480	Gm20342	-	-
1_63139023_63139261	239	1_63139023_63139261	-	30	0	8.2205	1.29729e-09	3.54454e-09	Up	Intron (ENSMUST00000138611/ENSMUSG00000084799, intron 1 of 3)	ENSMUSG00000084799	ENSMUST00000190095	Ino80dos	INO80 complex subunit D, opposite strand	Gm11602
1_63174879_63178896	4018	1_63176037_63178195	1_63174879_63178896	382	1275	-1.17568	1.34794e-07	2.58278e-07	Down	Promoter (<=1kb)	ENSMUSG00000025967	ENSMUST00000129339	Eef1b2	eukaryotic translation elongation factor 1 beta 2	2810017J07Rik|Eef1b
1_63201949_63202259	311	-	1_63201949_63202259	0	27	-7.50864	8.426e-06	1.282e-05	Down	Intron (ENSMUST00000141027/ENSMUSG00000086730, intron 1 of 1)	ENSMUSG00000086730	ENSMUST00000189722	Platr12	-	-
1_63211865_63212212	348	-	1_63211865_63212212	0	39	-8.03672	3.4461e-08	7.26383e-08	Down	Intron (ENSMUST00000050536/ENSMUSG00000046856, intron 2 of 2)	ENSMUSG00000046856	ENSMUST00000187533	Gpr1	G protein-coupled receptor 1	-
1_63212587_63213120	534	-	1_63212587_63213120	0	34	-7.83958	3.02271e-07	5.50653e-07	Down	Intron (ENSMUST00000050536/ENSMUSG00000046856, intron 2 of 2)	ENSMUSG00000046856	ENSMUST00000187533	Gpr1	G protein-coupled receptor 1	-
1_63323966_63324287	322	1_63323966_63324287	-	42	0	8.70454	1.17118e-12	7.07889e-12	Up	Distal Intergenic	ENSMUSG00000094214	ENSMUST00000083151	Gm23448	-	-
1_63552144_63552443	300	1_63552144_63552443	-	26	0	8.01479	2.21221e-08	4.74092e-08	Up	Intron (ENSMUST00000182642/ENSMUSG00000025964, intron 15 of 23)	ENSMUSG00000025964	ENSMUST00000134704	Adam23	a disintegrin and metallopeptidase domain 23	AW046396|MDC3
1_63754125_63754363	239	1_63754125_63754363	-	29	0	8.17176	3.99443e-09	1.00658e-08	Up	3' UTR	ENSMUSG00000025962	ENSMUST00000134454	Fastkd2	FAST kinase domains 2	2810421I24Rik
1_63754758_63754996	239	1_63754758_63754996	-	22	0	7.7748	4.1078e-07	7.32295e-07	Up	3' UTR	ENSMUSG00000025962	ENSMUST00000134454	Fastkd2	FAST kinase domains 2	2810421I24Rik
1_64087059_64087499	441	1_64087059_64087499	-	32	0	8.31331	4.26767e-10	1.30949e-09	Up	Intron (ENSMUST00000149820/ENSMUSG00000086836, intron 3 of 3)	ENSMUSG00000086836	ENSMUST00000149820	Gm13748	-	-
1_64089552_64091332	1781	1_64090159_64090452	1_64089552_64091332	26	113	-1.5531	1.44345e-05	2.18227e-05	Down	Exon (ENSMUST00000149820/ENSMUSG00000086836, exon 4 of 4)	ENSMUSG00000086836	ENSMUST00000149820	Gm13748	-	-
1_64106244_64106502	259	1_64106244_64106502	-	26	0	8.01479	2.21221e-08	4.74092e-08	Up	Intron (ENSMUST00000114086/ENSMUSG00000025959, intron 3 of 3)	ENSMUSG00000025959	ENSMUST00000055001	Klf7	Kruppel-like factor 7 (ubiquitous)	9830124P08Rik
1_64121691_64123071	1381	1_64121824_64122280;1_64122432_64123071	1_64121691_64122938	159	864	-1.87838	6.37111e-15	6.81818e-14	Down	Promoter (<=1kb)	ENSMUSG00000025959	ENSMUST00000135075	Klf7	Kruppel-like factor 7 (ubiquitous)	9830124P08Rik
1_64206592_64207043	452	-	1_64206592_64207043	0	33	-7.79671	5.23325e-07	9.17763e-07	Down	Intron (ENSMUST00000190863/ENSMUSG00000101895, intron 1 of 1)	ENSMUSG00000101895	ENSMUST00000117621	Gm28981	-	-
1_64212139_64212443	305	1_64212139_64212443	-	29	0	8.17176	3.99443e-09	1.00658e-08	Up	Intron (ENSMUST00000190863/ENSMUSG00000101895, intron 1 of 1)	ENSMUSG00000101895	ENSMUST00000117621	Gm28981	-	-
1_64223493_64223803	311	-	1_64223493_64223803	0	27	-7.50864	8.426e-06	1.282e-05	Down	Intron (ENSMUST00000190863/ENSMUSG00000101895, intron 1 of 1)	ENSMUSG00000101895	ENSMUST00000117621	Gm28981	-	-
1_64301397_64303002	1606	1_64302727_64303002	1_64301397_64302962	31	121	-1.3988	5.0379e-05	7.31566e-05	Down	Intron (ENSMUST00000190863/ENSMUSG00000101895, intron 1 of 1)	ENSMUSG00000101895	ENSMUST00000190863	Gm28981	-	-
1_64303458_64304351	894	-	1_64303458_64304351	0	69	-8.85745	6.54767e-14	5.43583e-13	Down	Promoter (1-2kb)	ENSMUSG00000101895	ENSMUST00000190863	Gm28981	-	-
1_64304419_64304661	243	1_64304419_64304661	-	21	0	7.708	4.1078e-07	7.32295e-07	Up	Promoter (1-2kb)	ENSMUSG00000101895	ENSMUST00000190863	Gm28981	-	-
1_64304992_64306691	1700	1_64305613_64306039	1_64304992_64306691	42	204	-1.71474	3.73666e-08	7.87333e-08	Down	Distal Intergenic	ENSMUSG00000101895	ENSMUST00000190863	Gm28981	-	-
1_64307540_64307982	443	-	1_64307540_64307982	0	33	-7.79671	5.23325e-07	9.17763e-07	Down	Distal Intergenic	ENSMUSG00000101895	ENSMUST00000190863	Gm28981	-	-
1_64531804_64533267	1464	1_64532785_64533210	1_64531804_64533267	53	348	-2.14994	5.21742e-14	4.56184e-13	Down	Promoter (<=1kb)	ENSMUSG00000025958	ENSMUST00000185594	Creb1	cAMP responsive element binding protein 1	2310001E10Rik|3526402H21Rik|AV083133|Creb|Creb-1
1_64533587_64534056	470	-	1_64533587_64534056	0	49	-8.3649	3.00325e-10	9.67805e-10	Down	Intron (ENSMUST00000185594/ENSMUSG00000025958, intron 1 of 7)	ENSMUSG00000025958	ENSMUST00000190348	Creb1	cAMP responsive element binding protein 1	2310001E10Rik|3526402H21Rik|AV083133|Creb|Creb-1
1_64616837_64618211	1375	1_64617346_64618211	1_64616837_64617865	81	267	-1.1569	2.40225e-05	3.56146e-05	Down	Promoter (<=1kb)	ENSMUSG00000025956	ENSMUST00000114079	Mettl21a	methyltransferase like 21A	2310038H17Rik|AI464204|Fam119a
1_64623115_64623453	339	-	1_64623115_64623453	0	22	-7.21498	8.35118e-06	1.282e-05	Down	Intron (ENSMUST00000186895/ENSMUSG00000101832, intron 1 of 3)	ENSMUSG00000101832	ENSMUST00000186895	Gm28982	-	-
1_64655297_64655609	313	1_64655297_64655609	-	27	0	8.06903	1.24618e-08	2.79243e-08	Up	Downstream (2-3kb)	ENSMUSG00000100437	ENSMUST00000189284	Gm29152	-	-
1_64690399_64690638	240	1_64690399_64690638	-	28	0	8.12131	7.04361e-09	1.66011e-08	Up	Promoter (<=1kb)	ENSMUSG00000070871	ENSMUST00000114077	Ccnyl1	cyclin Y-like 1	9630037P07Rik|AW554339
1_64719011_64719604	594	1_64719011_64719604	-	52	0	9.012	2.75344e-15	3.17747e-14	Up	Intron (ENSMUST00000114077/ENSMUSG00000070871, intron 9 of 10)	ENSMUSG00000070871	ENSMUST00000194323	Ccnyl1	cyclin Y-like 1	9630037P07Rik|AW554339
1_64736892_64737553	662	-	1_64736892_64737553	0	102	-9.42034	3.71413e-18	8.74993e-17	Down	5' UTR	ENSMUSG00000045005	ENSMUST00000116133	Fzd5	frizzled class receptor 5	5330434N09Rik|AI427138|Fz-5|Fz5|mFz5
1_64738015_64738322	308	1_64738015_64738322	-	50	0	8.95553	7.35991e-15	7.54998e-14	Up	Promoter (<=1kb)	ENSMUSG00000045005	ENSMUST00000063982	Fzd5	frizzled class receptor 5	5330434N09Rik|AI427138|Fz-5|Fz5|mFz5
1_64738681_64739209	529	1_64738681_64739209	-	46	0	8.83549	8.98453e-14	7.11197e-13	Up	Promoter (1-2kb)	ENSMUSG00000045005	ENSMUST00000063982	Fzd5	frizzled class receptor 5	5330434N09Rik|AI427138|Fz-5|Fz5|mFz5
1_64835542_64835911	370	1_64835542_64835911	-	36	0	8.48273	4.79413e-11	1.90587e-10	Up	Intron (ENSMUST00000139649/ENSMUSG00000051344, intron 3 of 8)	ENSMUSG00000051344	ENSMUST00000187188	Plekhm3	pleckstrin homology domain containing, family M, member 3	9430067K14Rik|A230102O09Rik|AI449570|DAPR|Plekhm1l
1_64836762_64837121	360	1_64836762_64837121	-	26	0	8.01479	2.21221e-08	4.74092e-08	Up	Promoter (<=1kb)	ENSMUSG00000051344	ENSMUST00000187188	Plekhm3	pleckstrin homology domain containing, family M, member 3	9430067K14Rik|A230102O09Rik|AI449570|DAPR|Plekhm1l
1_64840214_64840524	311	-	1_64840214_64840524	0	26	-7.4545	1.47851e-05	2.21227e-05	Down	Intron (ENSMUST00000139649/ENSMUSG00000051344, intron 3 of 8)	ENSMUSG00000051344	ENSMUST00000187188	Plekhm3	pleckstrin homology domain containing, family M, member 3	9430067K14Rik|A230102O09Rik|AI449570|DAPR|Plekhm1l
1_64843172_64843471	300	1_64843172_64843471	-	32	0	8.31331	4.26767e-10	1.30949e-09	Up	Intron (ENSMUST00000139649/ENSMUSG00000051344, intron 3 of 8)	ENSMUSG00000051344	ENSMUST00000187188	Plekhm3	pleckstrin homology domain containing, family M, member 3	9430067K14Rik|A230102O09Rik|AI449570|DAPR|Plekhm1l
1_64867565_64868128	564	-	1_64867565_64868128	0	40	-8.0731	2.01468e-08	4.43681e-08	Down	Intron (ENSMUST00000139649/ENSMUSG00000051344, intron 4 of 8)	ENSMUSG00000051344	ENSMUST00000187188	Plekhm3	pleckstrin homology domain containing, family M, member 3	9430067K14Rik|A230102O09Rik|AI449570|DAPR|Plekhm1l
1_64878666_64878947	282	1_64878666_64878947	-	27	0	8.06903	1.24618e-08	2.79243e-08	Up	Intron (ENSMUST00000139649/ENSMUSG00000051344, intron 4 of 8)	ENSMUSG00000051344	ENSMUST00000187188	Plekhm3	pleckstrin homology domain containing, family M, member 3	9430067K14Rik|A230102O09Rik|AI449570|DAPR|Plekhm1l
1_64895075_64896280	1206	1_64895075_64896198	1_64895586_64896280	107	54	1.54692	1.2755e-06	2.14438e-06	Up	Intron (ENSMUST00000139649/ENSMUSG00000051344, intron 6 of 8)	ENSMUSG00000051344	ENSMUST00000140857	Plekhm3	pleckstrin homology domain containing, family M, member 3	9430067K14Rik|A230102O09Rik|AI449570|DAPR|Plekhm1l
1_64901902_64902140	239	1_64901902_64902140	-	23	0	7.83864	2.27396e-07	4.21299e-07	Up	Intron (ENSMUST00000139649/ENSMUSG00000051344, intron 6 of 8)	ENSMUSG00000051344	ENSMUST00000140857	Plekhm3	pleckstrin homology domain containing, family M, member 3	9430067K14Rik|A230102O09Rik|AI449570|DAPR|Plekhm1l
1_64920782_64921251	470	1_64920782_64921251	-	44	0	8.7715	2.48909e-13	1.74548e-12	Up	Intron (ENSMUST00000139649/ENSMUSG00000051344, intron 6 of 8)	ENSMUSG00000051344	ENSMUST00000140857	Plekhm3	pleckstrin homology domain containing, family M, member 3	9430067K14Rik|A230102O09Rik|AI449570|DAPR|Plekhm1l
1_64922195_64922792	598	1_64922195_64922792	-	46	0	8.83549	8.98453e-14	7.11197e-13	Up	Exon (ENSMUST00000139649/ENSMUSG00000051344, exon 3 of 9)	ENSMUSG00000051344	ENSMUST00000140857	Plekhm3	pleckstrin homology domain containing, family M, member 3	9430067K14Rik|A230102O09Rik|AI449570|DAPR|Plekhm1l
1_64927471_64927749	279	1_64927471_64927749	-	33	0	8.35756	2.45934e-10	8.02848e-10	Up	Intron (ENSMUST00000139649/ENSMUSG00000051344, intron 7 of 8)	ENSMUSG00000051344	ENSMUST00000140857	Plekhm3	pleckstrin homology domain containing, family M, member 3	9430067K14Rik|A230102O09Rik|AI449570|DAPR|Plekhm1l
1_64946367_64947090	724	1_64946367_64947090	-	72	0	9.48071	4.20784e-20	1.51936e-18	Up	Intron (ENSMUST00000139649/ENSMUSG00000051344, intron 8 of 8)	ENSMUSG00000051344	ENSMUST00000134097	Plekhm3	pleckstrin homology domain containing, family M, member 3	9430067K14Rik|A230102O09Rik|AI449570|DAPR|Plekhm1l
1_64948209_64948574	366	1_64948209_64948574	-	32	0	8.31331	4.26767e-10	1.30949e-09	Up	Intron (ENSMUST00000139649/ENSMUSG00000051344, intron 8 of 8)	ENSMUSG00000051344	ENSMUST00000134097	Plekhm3	pleckstrin homology domain containing, family M, member 3	9430067K14Rik|A230102O09Rik|AI449570|DAPR|Plekhm1l
1_64948963_64950355	1393	1_64948963_64950355	-	125	0	10.2757	2.38767e-30	6.5242e-28	Up	Intron (ENSMUST00000139649/ENSMUSG00000051344, intron 8 of 8)	ENSMUSG00000051344	ENSMUST00000134097	Plekhm3	pleckstrin homology domain containing, family M, member 3	9430067K14Rik|A230102O09Rik|AI449570|DAPR|Plekhm1l
1_64952266_64952670	405	1_64952266_64952670	-	36	0	8.48273	4.79413e-11	1.90587e-10	Up	Intron (ENSMUST00000139649/ENSMUSG00000051344, intron 8 of 8)	ENSMUSG00000051344	ENSMUST00000134097	Plekhm3	pleckstrin homology domain containing, family M, member 3	9430067K14Rik|A230102O09Rik|AI449570|DAPR|Plekhm1l
1_64975489_64975747	259	1_64975489_64975747	-	35	0	8.4422	8.24314e-11	3.08621e-10	Up	Distal Intergenic	ENSMUSG00000051344	ENSMUST00000139649	Plekhm3	pleckstrin homology domain containing, family M, member 3	9430067K14Rik|A230102O09Rik|AI449570|DAPR|Plekhm1l
1_64978647_64979035	389	-	1_64978647_64979035	0	29	-7.61119	2.75402e-06	4.40215e-06	Down	Distal Intergenic	ENSMUSG00000084416	ENSMUST00000120360	Rpl10a-ps1	-	-
1_64982543_64982862	320	-	1_64982543_64982862	0	36	-7.9217	1.01568e-07	1.94955e-07	Down	Distal Intergenic	ENSMUSG00000084416	ENSMUST00000120360	Rpl10a-ps1	-	-
1_65012995_65013648	654	1_65013067_65013648	1_65012995_65013340	51	26	1.52954	0.000152688	0.000217911	Up	3' UTR	ENSMUSG00000025955	ENSMUST00000159896	Akr1cl	aldo-keto reductase family 1, member C-like	4921521F21Rik|AI451536|AI503553
1_65028528_65028894	367	-	1_65028528_65028894	0	28	-7.56082	4.812e-06	7.49864e-06	Down	Promoter (<=1kb)	ENSMUSG00000090042	ENSMUST00000161621	Gm8550	-	-
1_65034572_65035322	751	-	1_65034572_65035322	0	51	-8.42245	1.79489e-10	6.15694e-10	Down	Distal Intergenic	ENSMUSG00000025955	ENSMUST00000069142	Akr1cl	aldo-keto reductase family 1, member C-like	4921521F21Rik|AI451536|AI503553
1_65045390_65045999	610	-	1_65045390_65045999	0	36	-7.9217	1.01568e-07	1.94955e-07	Down	Downstream (2-3kb)	ENSMUSG00000070870	ENSMUST00000161960	Cryge	crystallin, gamma E	Cryg-2|Cryg-6|DGcry-2|Elo
1_65049038_65049334	297	1_65049038_65049334	-	38	0	8.56052	9.60067e-12	4.38615e-11	Up	Intron (ENSMUST00000087359/ENSMUSG00000070870, intron 1 of 2)	ENSMUSG00000070870	ENSMUST00000161960	Cryge	crystallin, gamma E	Cryg-2|Cryg-6|DGcry-2|Elo
1_65050280_65050606	327	1_65050280_65050606	-	50	0	8.95553	7.35991e-15	7.54998e-14	Up	Intron (ENSMUST00000087359/ENSMUSG00000070870, intron 1 of 2)	ENSMUSG00000070870	ENSMUST00000161960	Cryge	crystallin, gamma E	Cryg-2|Cryg-6|DGcry-2|Elo
1_65051150_65052311	1162	1_65051150_65052253	1_65051432_65052311	117	75	1.20288	5.35433e-05	7.75989e-05	Up	Promoter (1-2kb)	ENSMUSG00000070870	ENSMUST00000087359	Cryge	crystallin, gamma E	Cryg-2|Cryg-6|DGcry-2|Elo
1_65052513_65052916	404	1_65052513_65052916	-	38	0	8.56052	9.60067e-12	4.38615e-11	Up	Promoter (1-2kb)	ENSMUSG00000070870	ENSMUST00000087359	Cryge	crystallin, gamma E	Cryg-2|Cryg-6|DGcry-2|Elo
1_65080835_65081185	351	1_65080835_65081185	-	33	0	8.35756	2.45934e-10	8.02848e-10	Up	Intron (ENSMUST00000027090/ENSMUSG00000073658, intron 1 of 2)	ENSMUSG00000073658	ENSMUST00000027090	Crygb	crystallin, gamma B	Cryg-3|DGcry-3|Nop
1_65172316_65172895	580	1_65172316_65172895	-	51	0	8.98404	4.49613e-15	4.86904e-14	Up	Intron (ENSMUST00000097709/ENSMUSG00000025950, intron 7 of 8)	ENSMUSG00000025950	ENSMUST00000149310	Idh1	isocitrate dehydrogenase 1 (NADP+), soluble	AI314845|AI788952|E030024J03Rik|Id-1|Idh-1|Idpc
1_65173192_65173571	380	-	1_65173192_65173571	0	26	-7.4545	1.47851e-05	2.21227e-05	Down	Intron (ENSMUST00000097709/ENSMUSG00000025950, intron 7 of 8)	ENSMUSG00000025950	ENSMUST00000149310	Idh1	isocitrate dehydrogenase 1 (NADP+), soluble	AI314845|AI788952|E030024J03Rik|Id-1|Idh-1|Idpc
1_65181627_65181990	364	-	1_65181627_65181990	0	30	-7.65985	1.5797e-06	2.60196e-06	Down	5' UTR	ENSMUSG00000025950	ENSMUST00000097709	Idh1	isocitrate dehydrogenase 1 (NADP+), soluble	AI314845|AI788952|E030024J03Rik|Id-1|Idh-1|Idpc
1_65184580_65184904	325	-	1_65184580_65184904	0	31	-7.70693	9.08175e-07	1.53104e-06	Down	Promoter (1-2kb)	ENSMUSG00000025949	ENSMUST00000185317	Pikfyve	phosphoinositide kinase, FYVE type zinc finger containing	5230400C17Rik|Pip5k|Pip5k3|Pipk5k3|PipkIII|p235
1_65666770_65667242	473	-	1_65666770_65667242	0	39	-8.03672	3.4461e-08	7.26383e-08	Down	Distal Intergenic	ENSMUSG00000082774	ENSMUST00000117848	Gm8805	-	-
1_66443063_66443327	265	1_66443063_66443327	-	34	0	8.4005	1.42164e-10	4.99774e-10	Up	Downstream (<1kb)	ENSMUSG00000065694	ENSMUST00000083760	Gm25411	-	-
1_66699857_66700610	754	-	1_66699857_66700610	0	57	-8.58247	8.60156e-12	4.14024e-11	Down	Promoter (<=1kb)	ENSMUSG00000026005	ENSMUST00000151016	Rpe	ribulose-5-phosphate-3-epimerase	2810429B02Rik|5730518J08Rik
1_66714434_66714922	489	-	1_66714434_66714922	0	30	-7.65985	1.5797e-06	2.60196e-06	Down	3' UTR	ENSMUSG00000026005	ENSMUST00000190404	Rpe	ribulose-5-phosphate-3-epimerase	2810429B02Rik|5730518J08Rik
1_66816056_66816771	716	-	1_66816056_66816771	0	103	-9.4344	3.71413e-18	8.74993e-17	Down	Intron (ENSMUST00000068168/ENSMUSG00000026004, intron 13 of 13)	ENSMUSG00000026004	ENSMUST00000068168	Kansl1l	KAT8 regulatory NSL complex subunit 1-like	1110028C15Rik|1190030G24|AI427598|C430010P07Rik|mKIAA4189
1_66862043_66863150	1108	-	1_66862043_66863150	0	106	-9.47576	1.08086e-18	2.87966e-17	Down	Intron (ENSMUST00000027153/ENSMUSG00000026003, intron 10 of 10)	ENSMUSG00000026003	ENSMUST00000027153	Acadl	acyl-Coenzyme A dehydrogenase, long-chain	AA960361|AU018452|C79855|LCAD
1_66905922_66906160	239	1_66905922_66906160	-	24	0	7.89978	7.04324e-08	1.37487e-07	Up	Distal Intergenic	ENSMUSG00000061816	ENSMUST00000186346	Myl1	myosin, light polypeptide 1	AI325107|MLC1f|MLC3f|Mylf
1_66939461_66939848	388	-	1_66939461_66939848	0	37	-7.96106	5.909e-08	1.17873e-07	Down	Intron (ENSMUST00000027151/ENSMUSG00000061816, intron 6 of 6)	ENSMUSG00000061816	ENSMUST00000186202	Myl1	myosin, light polypeptide 1	AI325107|MLC1f|MLC3f|Mylf
1_66975237_66975727	491	1_66975237_66975727	1_66975259_66975702	57	37	1.18314	0.00127473	0.0017516	Up	Distal Intergenic	ENSMUSG00000082212	ENSMUST00000121328	Gm15826	-	-
1_67002312_67002550	239	1_67002312_67002550	-	24	0	7.89978	7.04324e-08	1.37487e-07	Up	3' UTR	ENSMUSG00000026000	ENSMUST00000133508	Lancl1	LanC (bacterial lantibiotic synthetase component C)-like 1	AW124738|Gpr69|Gpr69a|p40
1_67018751_67019184	434	1_67018751_67019184	-	40	0	8.63433	3.33429e-12	1.75371e-11	Up	Intron (ENSMUST00000027149/ENSMUSG00000026000, intron 6 of 9)	ENSMUSG00000026000	ENSMUST00000133508	Lancl1	LanC (bacterial lantibiotic synthetase component C)-like 1	AW124738|Gpr69|Gpr69a|p40
1_67026106_67026371	266	1_67026106_67026371	-	28	0	8.12131	7.04361e-09	1.66011e-08	Up	Intron (ENSMUST00000027149/ENSMUSG00000026000, intron 7 of 9)	ENSMUSG00000026000	ENSMUST00000189210	Lancl1	LanC (bacterial lantibiotic synthetase component C)-like 1	AW124738|Gpr69|Gpr69a|p40
1_67238857_67239217	361	1_67238857_67239217	-	30	0	8.2205	1.29729e-09	3.54454e-09	Up	Distal Intergenic	ENSMUSG00000086204	ENSMUST00000140506	Gm15668	-	-
1_67937599_67938104	506	1_67937727_67938104	1_67937599_67938079	58	34	1.32967	0.000442871	0.000620897	Up	Distal Intergenic	ENSMUSG00000104395	ENSMUST00000192182	Gm37957	-	-
1_67940107_67940453	347	-	1_67940107_67940453	0	33	-7.79671	5.23325e-07	9.17763e-07	Down	Distal Intergenic	ENSMUSG00000096031	ENSMUST00000178954	Gm23189	-	-
1_67965916_67967830	1915	-	1_67965916_67967830	0	221	-10.5347	4.05142e-33	1.99958e-30	Down	Distal Intergenic	ENSMUSG00000096031	ENSMUST00000178954	Gm23189	-	-
1_67969109_67969489	381	-	1_67969109_67969489	0	36	-7.9217	1.01568e-07	1.94955e-07	Down	Distal Intergenic	ENSMUSG00000096031	ENSMUST00000178954	Gm23189	-	-
1_67969736_67970069	334	1_67969736_67970069	-	26	0	8.01479	2.21221e-08	4.74092e-08	Up	Distal Intergenic	ENSMUSG00000096031	ENSMUST00000178954	Gm23189	-	-
1_67970665_67971247	583	-	1_67970665_67971247	0	43	-8.17707	4.08541e-09	1.01592e-08	Down	Distal Intergenic	ENSMUSG00000096031	ENSMUST00000178954	Gm23189	-	-
1_68074672_68075058	387	-	1_68074672_68075058	0	32	-7.75251	9.08175e-07	1.53104e-06	Down	Intron (ENSMUST00000119142/ENSMUSG00000062209, intron 5 of 27)	ENSMUSG00000062209	ENSMUST00000193344	Erbb4	erb-b2 receptor tyrosine kinase 4	Her4|c-erbB-4
1_68076787_68077301	515	-	1_68076787_68077301	0	39	-8.03672	3.4461e-08	7.26383e-08	Down	Intron (ENSMUST00000119142/ENSMUSG00000062209, intron 6 of 27)	ENSMUSG00000062209	ENSMUST00000193344	Erbb4	erb-b2 receptor tyrosine kinase 4	Her4|c-erbB-4
1_68089189_68089500	312	-	1_68089189_68089500	0	30	-7.65985	1.5797e-06	2.60196e-06	Down	Intron (ENSMUST00000119142/ENSMUSG00000062209, intron 8 of 27)	ENSMUSG00000062209	ENSMUST00000193344	Erbb4	erb-b2 receptor tyrosine kinase 4	Her4|c-erbB-4
1_68102834_68103259	426	-	1_68102834_68103259	0	40	-8.0731	2.01468e-08	4.43681e-08	Down	Intron (ENSMUST00000119142/ENSMUSG00000062209, intron 8 of 27)	ENSMUSG00000062209	ENSMUST00000193344	Erbb4	erb-b2 receptor tyrosine kinase 4	Her4|c-erbB-4
1_68780148_68780672	525	-	1_68780148_68780672	0	45	-8.24243	2.41201e-09	6.33597e-09	Down	Intron (ENSMUST00000119142/ENSMUSG00000062209, intron 27 of 27)	ENSMUSG00000062209	ENSMUST00000195066	Erbb4	erb-b2 receptor tyrosine kinase 4	Her4|c-erbB-4
1_68780979_68782033	1055	-	1_68780979_68782033	0	88	-9.20768	4.17918e-17	7.44633e-16	Down	Intron (ENSMUST00000119142/ENSMUSG00000062209, intron 27 of 27)	ENSMUSG00000062209	ENSMUST00000195066	Erbb4	erb-b2 receptor tyrosine kinase 4	Her4|c-erbB-4
1_68920453_68920717	265	1_68920453_68920717	-	19	0	7.56433	1.3552e-06	2.2703e-06	Up	Intron (ENSMUST00000119142/ENSMUSG00000062209, intron 27 of 27)	ENSMUSG00000062209	ENSMUST00000195066	Erbb4	erb-b2 receptor tyrosine kinase 4	Her4|c-erbB-4
1_68934831_68935210	380	-	1_68934831_68935210	0	28	-7.56082	4.812e-06	7.49864e-06	Down	Intron (ENSMUST00000119142/ENSMUSG00000062209, intron 27 of 27)	ENSMUSG00000062209	ENSMUST00000140116	Erbb4	erb-b2 receptor tyrosine kinase 4	Her4|c-erbB-4
1_68960620_68960930	311	-	1_68960620_68960930	0	29	-7.61119	2.75402e-06	4.40215e-06	Down	Intron (ENSMUST00000119142/ENSMUSG00000062209, intron 27 of 27)	ENSMUSG00000062209	ENSMUST00000140116	Erbb4	erb-b2 receptor tyrosine kinase 4	Her4|c-erbB-4
1_69104254_69104567	314	-	1_69104254_69104567	0	24	-7.33971	2.47519e-06	4.01712e-06	Down	Intron (ENSMUST00000119142/ENSMUSG00000062209, intron 27 of 27)	ENSMUSG00000062209	ENSMUST00000140116	Erbb4	erb-b2 receptor tyrosine kinase 4	Her4|c-erbB-4
1_69104919_69105738	820	-	1_69104919_69105738	0	73	-8.93858	1.5826e-14	1.51779e-13	Down	Intron (ENSMUST00000119142/ENSMUSG00000062209, intron 27 of 27)	ENSMUSG00000062209	ENSMUST00000140116	Erbb4	erb-b2 receptor tyrosine kinase 4	Her4|c-erbB-4
1_69105997_69106794	798	-	1_69105997_69106794	0	102	-9.42034	3.71413e-18	8.74993e-17	Down	Promoter (<=1kb)	ENSMUSG00000087514	ENSMUST00000140116	Gm16076	-	-
1_69106999_69107418	420	-	1_69106999_69107418	0	37	-7.96106	5.909e-08	1.17873e-07	Down	Promoter (<=1kb)	ENSMUSG00000087514	ENSMUST00000140116	Gm16076	-	-
1_69362700_69363036	337	1_69362700_69363036	-	21	0	7.708	4.1078e-07	7.32295e-07	Up	Distal Intergenic	ENSMUSG00000101387	ENSMUST00000187740	Pced1c-ps	-	-
1_69728687_69729095	409	-	1_69728687_69729095	0	31	-7.70693	9.08175e-07	1.53104e-06	Down	Distal Intergenic	ENSMUSG00000025997	ENSMUST00000187184	Ikzf2	IKAROS family zinc finger 2	A730095J18Rik|Helios|Zfpn1a2|Znfn1a2
1_71557107_71557608	502	-	1_71557107_71557608	0	77	-9.01539	3.89954e-15	4.40038e-14	Down	Promoter (<=1kb)	ENSMUSG00000026192	ENSMUST00000027384	Atic	5-aminoimidazole-4-carboxamide ribonucleotide formyltransferase/IMP cyclohydrolase	2610509C24Rik|AA536954|AW212393
1_72182512_72183047	536	-	1_72182512_72183047	0	40	-8.0731	2.01468e-08	4.43681e-08	Down	Intron (ENSMUST00000048860/ENSMUSG00000039395, intron 3 of 4)	ENSMUSG00000039395	ENSMUST00000048860	Mreg	melanoregulin	Gm974|Wdt2|dsu
1_72225704_72226262	559	-	1_72225704_72226262	0	117	-9.61801	2.90276e-20	1.08381e-18	Down	Promoter (<=1kb)	ENSMUSG00000094655	ENSMUST00000178786	Gm25360	-	-
1_72243554_72244307	754	1_72243714_72244242	1_72243554_72244307	163	633	-1.39383	8.07693e-09	1.90223e-08	Down	Promoter (<=1kb)	ENSMUSG00000093956	ENSMUST00000177868	Gm24497	-	-
1_72254674_72255097	424	-	1_72254674_72255097	0	177	-10.2146	4.19752e-28	7.63754e-26	Down	Promoter (<=1kb)	ENSMUSG00000093843	ENSMUST00000179876	Gm25939	-	-
1_72306961_72307358	398	-	1_72306961_72307358	0	29	-7.61119	2.75402e-06	4.40215e-06	Down	Promoter (<=1kb)	ENSMUSG00000026187	ENSMUST00000027379	Xrcc5	X-ray repair complementing defective repair in Chinese hamster cells 5	AI314015|Ku80|Ku86
1_72582172_72584520	2349	1_72583234_72583866	1_72582172_72584520	96	294	-1.05097	7.64029e-05	0.000110225	Down	Promoter (<=1kb)	ENSMUSG00000039354	ENSMUST00000145868	Smarcal1	SWI/SNF related matrix associated, actin dependent regulator of chromatin, subfamily a-like 1	6030401P21Rik|AI851716|Mharp
1_72584754_72585232	479	-	1_72584754_72585232	0	36	-7.9217	1.01568e-07	1.94955e-07	Down	Promoter (<=1kb)	ENSMUSG00000039354	ENSMUST00000150725	Smarcal1	SWI/SNF related matrix associated, actin dependent regulator of chromatin, subfamily a-like 1	6030401P21Rik|AI851716|Mharp
1_72728409_72728681	273	1_72728409_72728681	-	29	0	8.17176	3.99443e-09	1.00658e-08	Up	Distal Intergenic	ENSMUSG00000046330	ENSMUST00000059980	Rpl37a	ribosomal protein L37a	-
1_72731440_72731678	239	1_72731440_72731678	-	26	0	8.01479	2.21221e-08	4.74092e-08	Up	Distal Intergenic	ENSMUSG00000046330	ENSMUST00000059980	Rpl37a	ribosomal protein L37a	-
1_72797651_72798181	531	-	1_72797651_72798181	0	44	-8.21012	2.41201e-09	6.33597e-09	Down	Distal Intergenic	ENSMUSG00000039323	ENSMUST00000047328	Igfbp2	insulin-like growth factor binding protein 2	AI255832|IBP-2|Igfbp-2|mIGFBP-2
1_72798924_72799254	331	1_72798924_72799254	-	30	0	8.2205	1.29729e-09	3.54454e-09	Up	Distal Intergenic	ENSMUSG00000039323	ENSMUST00000047328	Igfbp2	insulin-like growth factor binding protein 2	AI255832|IBP-2|Igfbp-2|mIGFBP-2
1_72800765_72801090	326	-	1_72800765_72801090	0	19	-7.00501	5.32834e-05	7.72293e-05	Down	Distal Intergenic	ENSMUSG00000039323	ENSMUST00000047328	Igfbp2	insulin-like growth factor binding protein 2	AI255832|IBP-2|Igfbp-2|mIGFBP-2
1_72808481_72809026	546	-	1_72808481_72809026	0	39	-8.03672	3.4461e-08	7.26383e-08	Down	Distal Intergenic	ENSMUSG00000039323	ENSMUST00000047328	Igfbp2	insulin-like growth factor binding protein 2	AI255832|IBP-2|Igfbp-2|mIGFBP-2
1_72815181_72815865	685	1_72815181_72815865	-	54	0	9.06635	1.04021e-15	1.33762e-14	Up	Distal Intergenic	ENSMUSG00000039323	ENSMUST00000047328	Igfbp2	insulin-like growth factor binding protein 2	AI255832|IBP-2|Igfbp-2|mIGFBP-2
1_72819525_72819995	471	-	1_72819525_72819995	0	37	-7.96106	5.909e-08	1.17873e-07	Down	Distal Intergenic	ENSMUSG00000039323	ENSMUST00000047328	Igfbp2	insulin-like growth factor binding protein 2	AI255832|IBP-2|Igfbp-2|mIGFBP-2
1_72822737_72824348	1612	1_72823356_72823594;1_72823822_72824309	1_72822737_72824348	98	317	-1.12987	1.97299e-05	2.93133e-05	Down	Promoter (<=1kb)	ENSMUSG00000039323	ENSMUST00000047328	Igfbp2	insulin-like growth factor binding protein 2	AI255832|IBP-2|Igfbp-2|mIGFBP-2
1_72839647_72840151	505	1_72839647_72840151	-	38	0	8.56052	9.60067e-12	4.38615e-11	Up	Intron (ENSMUST00000047328/ENSMUSG00000039323, intron 1 of 3)	ENSMUSG00000039323	ENSMUST00000155703	Igfbp2	insulin-like growth factor binding protein 2	AI255832|IBP-2|Igfbp-2|mIGFBP-2
1_72840741_72841023	283	1_72840741_72841023	-	31	0	8.26765	7.42892e-10	2.14936e-09	Up	Intron (ENSMUST00000047328/ENSMUSG00000039323, intron 1 of 3)	ENSMUSG00000039323	ENSMUST00000155703	Igfbp2	insulin-like growth factor binding protein 2	AI255832|IBP-2|Igfbp-2|mIGFBP-2
1_72841977_72842287	311	-	1_72841977_72842287	0	27	-7.50864	8.426e-06	1.282e-05	Down	Intron (ENSMUST00000047328/ENSMUSG00000039323, intron 1 of 3)	ENSMUSG00000039323	ENSMUST00000155703	Igfbp2	insulin-like growth factor binding protein 2	AI255832|IBP-2|Igfbp-2|mIGFBP-2
1_72844971_72845222	252	1_72844971_72845222	-	39	0	8.59789	5.64977e-12	2.78967e-11	Up	Intron (ENSMUST00000047328/ENSMUSG00000039323, intron 1 of 3)	ENSMUSG00000039323	ENSMUST00000155703	Igfbp2	insulin-like growth factor binding protein 2	AI255832|IBP-2|Igfbp-2|mIGFBP-2
1_72853262_72853510	249	1_72853262_72853510	-	31	0	8.26765	7.42892e-10	2.14936e-09	Up	Downstream (<1kb)	ENSMUSG00000039323	ENSMUST00000155703	Igfbp2	insulin-like growth factor binding protein 2	AI255832|IBP-2|Igfbp-2|mIGFBP-2
1_72963285_72964138	854	-	1_72963285_72964138	0	59	-8.63209	5.22709e-12	2.71383e-11	Down	Distal Intergenic	ENSMUSG00000101968	ENSMUST00000188793	1700027A15Rik	RIKEN cDNA 1700027A15 gene	-
1_73047702_73048012	311	-	1_73047702_73048012	0	30	-7.65985	1.5797e-06	2.60196e-06	Down	Distal Intergenic	ENSMUSG00000101968	ENSMUST00000190525	1700027A15Rik	RIKEN cDNA 1700027A15 gene	-
1_73053204_73053646	443	-	1_73053204_73053646	0	29	-7.61119	2.75402e-06	4.40215e-06	Down	Distal Intergenic	ENSMUSG00000101968	ENSMUST00000190525	1700027A15Rik	RIKEN cDNA 1700027A15 gene	-
1_73055355_73055610	256	1_73055355_73055610	-	22	0	7.7748	4.1078e-07	7.32295e-07	Up	Distal Intergenic	ENSMUSG00000101968	ENSMUST00000190525	1700027A15Rik	RIKEN cDNA 1700027A15 gene	-
1_73083794_73084132	339	-	1_73083794_73084132	0	28	-7.56082	4.812e-06	7.49864e-06	Down	Distal Intergenic	ENSMUSG00000101968	ENSMUST00000190525	1700027A15Rik	RIKEN cDNA 1700027A15 gene	-
1_73084377_73084951	575	-	1_73084377_73084951	0	59	-8.63209	5.22709e-12	2.71383e-11	Down	Distal Intergenic	ENSMUSG00000101968	ENSMUST00000190525	1700027A15Rik	RIKEN cDNA 1700027A15 gene	-
1_73085405_73086330	926	-	1_73085405_73086330	0	78	-9.03397	2.455e-15	2.95618e-14	Down	Distal Intergenic	ENSMUSG00000101968	ENSMUST00000190525	1700027A15Rik	RIKEN cDNA 1700027A15 gene	-
1_73086549_73087160	612	-	1_73086549_73087160	0	35	-7.88122	1.75007e-07	3.29918e-07	Down	Distal Intergenic	ENSMUSG00000101968	ENSMUST00000190525	1700027A15Rik	RIKEN cDNA 1700027A15 gene	-
1_73087478_73087722	245	1_73087478_73087722	-	28	0	8.12131	7.04361e-09	1.66011e-08	Up	Distal Intergenic	ENSMUSG00000101968	ENSMUST00000190525	1700027A15Rik	RIKEN cDNA 1700027A15 gene	-
1_73087969_73088449	481	1_73087969_73088432	1_73088139_73088449	63	24	1.94865	6.80219e-07	1.19027e-06	Up	Distal Intergenic	ENSMUSG00000101968	ENSMUST00000190525	1700027A15Rik	RIKEN cDNA 1700027A15 gene	-
1_73124734_73125073	340	-	1_73124734_73125073	0	28	-7.56082	4.812e-06	7.49864e-06	Down	Distal Intergenic	ENSMUSG00000102266	ENSMUST00000194107	Gm38106	-	-
1_73822410_73822670	261	1_73822410_73822670	-	25	0	7.95843	3.94049e-08	8.10452e-08	Up	Exon (ENSMUST00000188600/ENSMUSG00000101344, exon 5 of 8)	ENSMUSG00000101344	ENSMUST00000188600	Gm29183	-	-
1_73824034_73824344	311	-	1_73824034_73824344	0	27	-7.50864	8.426e-06	1.282e-05	Down	Intron (ENSMUST00000189514/ENSMUSG00000100301, intron 3 of 8)	ENSMUSG00000100301	ENSMUST00000188600	6030407O03Rik	RIKEN cDNA 6030407O03 gene	-
1_73824654_73825102	449	1_73824654_73825102	-	48	0	8.89676	3.27725e-14	2.96107e-13	Up	Intron (ENSMUST00000189514/ENSMUSG00000100301, intron 3 of 8)	ENSMUSG00000100301	ENSMUST00000188600	6030407O03Rik	RIKEN cDNA 6030407O03 gene	-
1_73856932_73857170	239	1_73856932_73857170	-	25	0	7.95843	3.94049e-08	8.10452e-08	Up	Promoter (1-2kb)	ENSMUSG00000098504	ENSMUST00000183826	Mir6351	microRNA 6351	Gm27936|mmu-mir-6351
1_73941866_73942797	932	-	1_73941866_73942797	0	67	-8.8151	1.70595e-13	1.2575e-12	Down	Promoter (1-2kb)	ENSMUSG00000055322	ENSMUST00000189228	Tns1	tensin 1	1110018I21Rik|1200014E20Rik|AI648117|E030018G17Rik|E030037J05Rik|Tns
1_73948265_73948685	421	1_73948265_73948685	-	34	0	8.4005	1.42164e-10	4.99774e-10	Up	Intron (ENSMUST00000169786/ENSMUSG00000055322, intron 16 of 34)	ENSMUSG00000055322	ENSMUST00000189228	Tns1	tensin 1	1110018I21Rik|1200014E20Rik|AI648117|E030018G17Rik|E030037J05Rik|Tns
1_73952413_73953251	839	1_73952666_73953251	1_73952413_73952945	52	37	1.05094	0.00679035	0.00894148	Up	Exon (ENSMUST00000169786/ENSMUSG00000055322, exon 19 of 35)	ENSMUSG00000055322	ENSMUST00000191367	Tns1	tensin 1	1110018I21Rik|1200014E20Rik|AI648117|E030018G17Rik|E030037J05Rik|Tns
1_73956526_73956783	258	1_73956526_73956783	-	29	0	8.17176	3.99443e-09	1.00658e-08	Up	Intron (ENSMUST00000169786/ENSMUSG00000055322, intron 17 of 34)	ENSMUSG00000055322	ENSMUST00000191367	Tns1	tensin 1	1110018I21Rik|1200014E20Rik|AI648117|E030018G17Rik|E030037J05Rik|Tns
1_73958007_73958805	799	1_73958007_73958805	-	70	0	9.44013	1.57453e-19	5.08953e-18	Up	Intron (ENSMUST00000169786/ENSMUSG00000055322, intron 17 of 34)	ENSMUSG00000055322	ENSMUST00000191367	Tns1	tensin 1	1110018I21Rik|1200014E20Rik|AI648117|E030018G17Rik|E030037J05Rik|Tns
1_73959124_73959650	527	1_73959124_73959650	-	57	0	9.14421	1.52753e-16	2.37594e-15	Up	Intron (ENSMUST00000169786/ENSMUSG00000055322, intron 17 of 34)	ENSMUSG00000055322	ENSMUST00000191367	Tns1	tensin 1	1110018I21Rik|1200014E20Rik|AI648117|E030018G17Rik|E030037J05Rik|Tns
1_73968375_73968897	523	1_73968375_73968897	-	38	0	8.56052	9.60067e-12	4.38615e-11	Up	Intron (ENSMUST00000169786/ENSMUSG00000055322, intron 17 of 34)	ENSMUSG00000055322	ENSMUST00000191367	Tns1	tensin 1	1110018I21Rik|1200014E20Rik|AI648117|E030018G17Rik|E030037J05Rik|Tns
1_73989939_73990344	406	1_73989939_73990344	-	45	0	8.80385	1.49345e-13	1.11491e-12	Up	Exon (ENSMUST00000169786/ENSMUSG00000055322, exon 12 of 35)	ENSMUSG00000055322	ENSMUST00000188942	Tns1	tensin 1	1110018I21Rik|1200014E20Rik|AI648117|E030018G17Rik|E030037J05Rik|Tns
1_74024867_74025515	649	1_74024867_74025515	-	78	0	9.59603	2.07007e-21	1.00969e-19	Up	Intron (ENSMUST00000169786/ENSMUSG00000055322, intron 32 of 34)	ENSMUSG00000055322	ENSMUST00000186381	Tns1	tensin 1	1110018I21Rik|1200014E20Rik|AI648117|E030018G17Rik|E030037J05Rik|Tns
1_74026109_74026394	286	1_74026109_74026394	-	22	0	7.7748	4.1078e-07	7.32295e-07	Up	Intron (ENSMUST00000169786/ENSMUSG00000055322, intron 32 of 34)	ENSMUSG00000055322	ENSMUST00000186381	Tns1	tensin 1	1110018I21Rik|1200014E20Rik|AI648117|E030018G17Rik|E030037J05Rik|Tns
1_74033301_74033634	334	1_74033301_74033634	-	23	0	7.83864	2.27396e-07	4.21299e-07	Up	Intron (ENSMUST00000169786/ENSMUSG00000055322, intron 32 of 34)	ENSMUSG00000055322	ENSMUST00000187281	Tns1	tensin 1	1110018I21Rik|1200014E20Rik|AI648117|E030018G17Rik|E030037J05Rik|Tns
1_74058740_74058978	239	1_74058740_74058978	-	24	0	7.89978	7.04324e-08	1.37487e-07	Up	Intron (ENSMUST00000169786/ENSMUSG00000055322, intron 32 of 34)	ENSMUSG00000055322	ENSMUST00000190599	Tns1	tensin 1	1110018I21Rik|1200014E20Rik|AI648117|E030018G17Rik|E030037J05Rik|Tns
1_74090471_74090804	334	1_74090471_74090804	-	29	0	8.17176	3.99443e-09	1.00658e-08	Up	Intron (ENSMUST00000169786/ENSMUSG00000055322, intron 34 of 34)	ENSMUSG00000055322	ENSMUST00000187584	Tns1	tensin 1	1110018I21Rik|1200014E20Rik|AI648117|E030018G17Rik|E030037J05Rik|Tns
1_74092170_74092592	423	1_74092170_74092592	-	71	0	9.46056	1.0122e-19	3.38978e-18	Up	Promoter (1-2kb)	ENSMUSG00000055322	ENSMUST00000187584	Tns1	tensin 1	1110018I21Rik|1200014E20Rik|AI648117|E030018G17Rik|E030037J05Rik|Tns
1_74092924_74093435	512	-	1_74092924_74093435	0	44	-8.21012	2.41201e-09	6.33597e-09	Down	Intron (ENSMUST00000169786/ENSMUSG00000055322, intron 34 of 34)	ENSMUSG00000055322	ENSMUST00000187584	Tns1	tensin 1	1110018I21Rik|1200014E20Rik|AI648117|E030018G17Rik|E030037J05Rik|Tns
1_74094399_74094655	257	1_74094399_74094655	-	39	0	8.59789	5.64977e-12	2.78967e-11	Up	Intron (ENSMUST00000169786/ENSMUSG00000055322, intron 34 of 34)	ENSMUSG00000055322	ENSMUST00000191204	Tns1	tensin 1	1110018I21Rik|1200014E20Rik|AI648117|E030018G17Rik|E030037J05Rik|Tns
1_74098647_74099271	625	-	1_74098647_74099271	0	61	-8.68007	1.9438e-12	1.10472e-11	Down	Intron (ENSMUST00000169786/ENSMUSG00000055322, intron 34 of 34)	ENSMUSG00000055322	ENSMUST00000188208	Tns1	tensin 1	1110018I21Rik|1200014E20Rik|AI648117|E030018G17Rik|E030037J05Rik|Tns
1_74104079_74104971	893	1_74104158_74104971	1_74104079_74104489	86	29	2.12553	3.51962e-09	9.2295e-09	Up	Intron (ENSMUST00000169786/ENSMUSG00000055322, intron 34 of 34)	ENSMUSG00000055322	ENSMUST00000188208	Tns1	tensin 1	1110018I21Rik|1200014E20Rik|AI648117|E030018G17Rik|E030037J05Rik|Tns
1_74107285_74107767	483	-	1_74107285_74107767	0	40	-8.0731	2.01468e-08	4.43681e-08	Down	Intron (ENSMUST00000169786/ENSMUSG00000055322, intron 34 of 34)	ENSMUSG00000055322	ENSMUST00000188208	Tns1	tensin 1	1110018I21Rik|1200014E20Rik|AI648117|E030018G17Rik|E030037J05Rik|Tns
1_74114653_74115166	514	-	1_74114653_74115166	0	40	-8.0731	2.01468e-08	4.43681e-08	Down	Intron (ENSMUST00000169786/ENSMUSG00000055322, intron 34 of 34)	ENSMUSG00000055322	ENSMUST00000169786	Tns1	tensin 1	1110018I21Rik|1200014E20Rik|AI648117|E030018G17Rik|E030037J05Rik|Tns
1_74120954_74121379	426	-	1_74120954_74121379	0	20	-7.07845	2.86152e-05	4.18444e-05	Down	Intron (ENSMUST00000169786/ENSMUSG00000055322, intron 34 of 34)	ENSMUSG00000055322	ENSMUST00000169786	Tns1	tensin 1	1110018I21Rik|1200014E20Rik|AI648117|E030018G17Rik|E030037J05Rik|Tns
1_74121738_74122093	356	1_74121738_74122093	-	29	0	8.17176	3.99443e-09	1.00658e-08	Up	Intron (ENSMUST00000169786/ENSMUSG00000055322, intron 34 of 34)	ENSMUSG00000055322	ENSMUST00000169786	Tns1	tensin 1	1110018I21Rik|1200014E20Rik|AI648117|E030018G17Rik|E030037J05Rik|Tns
1_74200711_74201296	586	1_74200711_74201296	-	50	0	8.95553	7.35991e-15	7.54998e-14	Up	Distal Intergenic	ENSMUSG00000087820	ENSMUST00000157195	Mir1928	microRNA 1928	mmu-mir-1928
1_74204751_74205190	440	1_74204751_74205190	-	36	0	8.48273	4.79413e-11	1.90587e-10	Up	Downstream (1-2kb)	ENSMUSG00000087820	ENSMUST00000157195	Mir1928	microRNA 1928	mmu-mir-1928
1_74206110_74208242	2133	1_74207726_74208089	1_74206110_74208242	46	171	-1.32943	1.76804e-05	2.63034e-05	Down	Promoter (<=1kb)	ENSMUSG00000087820	ENSMUST00000157195	Mir1928	microRNA 1928	mmu-mir-1928
1_74220014_74220557	544	1_74220014_74220557	-	53	0	9.03943	1.69034e-15	2.06502e-14	Up	Distal Intergenic	ENSMUSG00000094768	ENSMUST00000101821	Gm25524	-	-
1_74227079_74227693	615	-	1_74227079_74227693	0	47	-8.30497	8.46962e-10	2.41856e-09	Down	Distal Intergenic	ENSMUSG00000006304	ENSMUST00000185733	Arpc2	actin related protein 2/3 complex, subunit 2	2210023N03Rik|34kDa|p34-Arc
1_74229631_74230184	554	1_74229631_74230184	-	44	0	8.7715	2.48909e-13	1.74548e-12	Up	Distal Intergenic	ENSMUSG00000006304	ENSMUST00000185733	Arpc2	actin related protein 2/3 complex, subunit 2	2210023N03Rik|34kDa|p34-Arc
1_74230358_74230684	327	-	1_74230358_74230684	0	22	-7.21498	8.35118e-06	1.282e-05	Down	Distal Intergenic	ENSMUSG00000006304	ENSMUST00000185733	Arpc2	actin related protein 2/3 complex, subunit 2	2210023N03Rik|34kDa|p34-Arc
1_74232208_74232518	311	-	1_74232208_74232518	0	24	-7.33971	2.47519e-06	4.01712e-06	Down	Distal Intergenic	ENSMUSG00000006304	ENSMUST00000185733	Arpc2	actin related protein 2/3 complex, subunit 2	2210023N03Rik|34kDa|p34-Arc
1_74242964_74244449	1486	1_74243016_74243390;1_74243739_74244449	1_74242964_74243843	88	63	1.04335	0.00124834	0.00171638	Up	Intron (ENSMUST00000113820/ENSMUSG00000006304, intron 2 of 10)	ENSMUSG00000006304	ENSMUST00000113819	Arpc2	actin related protein 2/3 complex, subunit 2	2210023N03Rik|34kDa|p34-Arc
1_74248471_74248852	382	1_74248471_74248852	-	47	0	8.86645	5.41924e-14	4.56184e-13	Up	Intron (ENSMUST00000113820/ENSMUSG00000006304, intron 4 of 10)	ENSMUSG00000006304	ENSMUST00000113819	Arpc2	actin related protein 2/3 complex, subunit 2	2210023N03Rik|34kDa|p34-Arc
1_74251014_74251465	452	-	1_74251014_74251465	0	47	-8.30497	8.46962e-10	2.41856e-09	Down	Exon (ENSMUST00000113820/ENSMUSG00000006304, exon 5 of 11)	ENSMUSG00000006304	ENSMUST00000113819	Arpc2	actin related protein 2/3 complex, subunit 2	2210023N03Rik|34kDa|p34-Arc
1_74260113_74261158	1046	-	1_74260113_74261158	0	74	-8.95817	9.9007e-15	1.00274e-13	Down	Intron (ENSMUST00000113820/ENSMUSG00000006304, intron 7 of 10)	ENSMUSG00000006304	ENSMUST00000077985	Arpc2	actin related protein 2/3 complex, subunit 2	2210023N03Rik|34kDa|p34-Arc
1_74261604_74263137	1534	-	1_74261604_74263137	0	109	-9.51596	4.78503e-19	1.39846e-17	Down	Exon (ENSMUST00000113820/ENSMUSG00000006304, exon 8 of 11)	ENSMUSG00000006304	ENSMUST00000077985	Arpc2	actin related protein 2/3 complex, subunit 2	2210023N03Rik|34kDa|p34-Arc
1_74270770_74271100	331	1_74270770_74271100	-	24	0	7.89978	7.04324e-08	1.37487e-07	Up	Downstream (2-3kb)	ENSMUSG00000064272	ENSMUST00000077985	Gpbar1	G protein-coupled bile acid receptor 1	BG37|GPCR|GPR131|M-BAR|TGR5
1_74273851_74274168	318	1_74273851_74274168	-	30	0	8.2205	1.29729e-09	3.54454e-09	Up	Distal Intergenic	ENSMUSG00000064272	ENSMUST00000077985	Gpbar1	G protein-coupled bile acid receptor 1	BG37|GPCR|GPR131|M-BAR|TGR5
1_74280757_74281067	311	-	1_74280757_74281067	0	31	-7.70693	9.08175e-07	1.53104e-06	Down	Promoter (<=1kb)	ENSMUSG00000101503	ENSMUST00000187908	Gm28364	-	-
1_74283787_74284781	995	1_74284385_74284689	1_74283787_74284781	50	215	-1.53947	2.53541e-07	4.69429e-07	Down	Promoter (<=1kb)	ENSMUSG00000006299	ENSMUST00000006462	Aamp	angio-associated migratory protein	AU040907|Aamp-rs
1_74285091_74285956	866	-	1_74285091_74285956	0	54	-8.50467	3.88735e-11	1.62113e-10	Down	Promoter (<=1kb)	ENSMUSG00000026179	ENSMUST00000152492	Pnkd	paroxysmal nonkinesiogenic dyskinesia	2210013N15Rik|2810403H05Rik|AI854243|Brp17|MNCb-5687|MR-1|Tahccp2
1_74287474_74287784	311	-	1_74287474_74287784	0	28	-7.56082	4.812e-06	7.49864e-06	Down	Promoter (<=1kb)	ENSMUSG00000103013	ENSMUST00000192088	Gm37503	-	-
1_74289859_74290163	305	1_74289859_74290163	-	28	0	8.12131	7.04361e-09	1.66011e-08	Up	Exon (ENSMUST00000016309/ENSMUSG00000006301, exon 11 of 12)	ENSMUSG00000006301	ENSMUST00000128505	Tmbim1	transmembrane BAX inhibitor motif containing 1	2310061B02Rik|AA960455|AU024746|C78899|RECS1|Tmbib1|mKIAA4161
1_74299687_74299961	275	1_74299687_74299961	-	47	0	8.86645	5.41924e-14	4.56184e-13	Up	5' UTR	ENSMUSG00000099931	ENSMUST00000187941	Gm29358	-	-
1_74301130_74301423	294	1_74301130_74301423	-	41	0	8.66986	1.97336e-12	1.10472e-11	Up	5' UTR	ENSMUSG00000006301	ENSMUST00000141560	Tmbim1	transmembrane BAX inhibitor motif containing 1	2310061B02Rik|AA960455|AU024746|C78899|RECS1|Tmbib1|mKIAA4161
1_74302072_74302410	339	-	1_74302072_74302410	0	33	-7.79671	5.23325e-07	9.17763e-07	Down	5' UTR	ENSMUSG00000006301	ENSMUST00000141560	Tmbim1	transmembrane BAX inhibitor motif containing 1	2310061B02Rik|AA960455|AU024746|C78899|RECS1|Tmbib1|mKIAA4161
1_74302717_74303173	457	-	1_74302717_74303173	0	53	-8.47778	6.45764e-11	2.53503e-10	Down	5' UTR	ENSMUSG00000006301	ENSMUST00000141560	Tmbim1	transmembrane BAX inhibitor motif containing 1	2310061B02Rik|AA960455|AU024746|C78899|RECS1|Tmbib1|mKIAA4161
1_74303583_74305993	2411	1_74303680_74304159;1_74305272_74305831	1_74303583_74305993	99	354	-1.27443	1.0408e-06	1.75286e-06	Down	Promoter (<=1kb)	ENSMUSG00000006301	ENSMUST00000016309	Tmbim1	transmembrane BAX inhibitor motif containing 1	2310061B02Rik|AA960455|AU024746|C78899|RECS1|Tmbib1|mKIAA4161
1_74306112_74306547	436	1_74306112_74306384	1_74306206_74306547	33	23	1.07887	0.0181302	0.0231656	Up	Promoter (<=1kb)	ENSMUSG00000006301	ENSMUST00000130763	Tmbim1	transmembrane BAX inhibitor motif containing 1	2310061B02Rik|AA960455|AU024746|C78899|RECS1|Tmbib1|mKIAA4161
1_74309228_74309632	405	1_74309228_74309632	-	49	0	8.92644	1.20778e-14	1.17285e-13	Up	Exon (ENSMUST00000194686/ENSMUSG00000103403, exon 1 of 1)	ENSMUSG00000103403	ENSMUST00000194686	Gm37931	-	-
1_74332679_74333099	421	-	1_74332679_74333099	0	45	-8.24243	2.41201e-09	6.33597e-09	Down	Promoter (<=1kb)	ENSMUSG00000026179	ENSMUST00000190398	Pnkd	paroxysmal nonkinesiogenic dyskinesia	2210013N15Rik|2810403H05Rik|AI854243|Brp17|MNCb-5687|MR-1|Tahccp2
1_74343402_74344782	1381	1_74343402_74344782	1_74344271_74344758	124	30	2.60428	1.56935e-14	1.51779e-13	Up	Intron (ENSMUST00000027370/ENSMUSG00000026179, intron 2 of 9)	ENSMUSG00000026179	ENSMUST00000190398	Pnkd	paroxysmal nonkinesiogenic dyskinesia	2210013N15Rik|2810403H05Rik|AI854243|Brp17|MNCb-5687|MR-1|Tahccp2
1_74346652_74346890	239	1_74346652_74346890	-	19	0	7.56433	1.3552e-06	2.2703e-06	Up	Intron (ENSMUST00000027370/ENSMUSG00000026179, intron 2 of 9)	ENSMUSG00000026179	ENSMUST00000190398	Pnkd	paroxysmal nonkinesiogenic dyskinesia	2210013N15Rik|2810403H05Rik|AI854243|Brp17|MNCb-5687|MR-1|Tahccp2
1_74379882_74380327	446	1_74379882_74380327	-	34	0	8.4005	1.42164e-10	4.99774e-10	Up	Promoter (1-2kb)	ENSMUSG00000026177	ENSMUST00000133896	Slc11a1	solute carrier family 11 (proton-coupled divalent metal ion transporters), member 1	Bcg|Ity|Ity1|Lsh|Nramp|Nramp1|ity
1_74384970_74385267	298	1_74384970_74385267	-	26	0	8.01479	2.21221e-08	4.74092e-08	Up	Exon (ENSMUST00000187516/ENSMUSG00000026177, exon 13 of 14)	ENSMUSG00000026177	ENSMUST00000134189	Slc11a1	solute carrier family 11 (proton-coupled divalent metal ion transporters), member 1	Bcg|Ity|Ity1|Lsh|Nramp|Nramp1|ity
1_74389374_74389612	239	1_74389374_74389612	-	37	0	8.52215	1.63617e-11	7.0045e-11	Up	Promoter (1-2kb)	ENSMUSG00000026176	ENSMUST00000027367	Ctdsp1	CTD (carboxy-terminal domain, RNA polymerase II, polypeptide A) small phosphatase 1	GIP|NLIIF|Nif3|SCP1
1_74396134_74398345	2212	1_74396756_74397194;1_74397505_74398345	1_74396134_74398342	215	682	-1.10212	2.5097e-06	4.07254e-06	Down	3' UTR	ENSMUSG00000065468	ENSMUST00000083534	Mir26b	microRNA 26b	Mirn26b|mir-26b|mmu-mir-26b
1_74401488_74401833	346	-	1_74401488_74401833	0	26	-7.4545	1.47851e-05	2.21227e-05	Down	Distal Intergenic	ENSMUSG00000065468	ENSMUST00000083534	Mir26b	microRNA 26b	Mirn26b|mir-26b|mmu-mir-26b
1_74412036_74412439	404	-	1_74412036_74412439	0	26	-7.4545	1.47851e-05	2.21227e-05	Down	Intron (ENSMUST00000027366/ENSMUSG00000026175, intron 1 of 19)	ENSMUSG00000026175	ENSMUST00000027366	Vil1	villin 1	Vil
1_74429702_74429946	245	1_74429702_74429946	-	28	0	8.12131	7.04361e-09	1.66011e-08	Up	Intron (ENSMUST00000027366/ENSMUSG00000026175, intron 17 of 19)	ENSMUSG00000026175	ENSMUST00000163018	Vil1	villin 1	Vil
1_74438737_74439064	328	-	1_74438737_74439064	0	24	-7.33971	2.47519e-06	4.01712e-06	Down	3' UTR	ENSMUSG00000026175	ENSMUST00000163018	Vil1	villin 1	Vil
1_74441091_74441362	272	1_74441091_74441362	-	30	0	8.2205	1.29729e-09	3.54454e-09	Up	Intron (ENSMUST00000044260/ENSMUSG00000033364, intron 2 of 23)	ENSMUSG00000033364	ENSMUST00000163018	Usp37	ubiquitin specific peptidase 37	4932415L06Rik|C330008N13Rik
1_74447719_74448443	725	1_74447719_74448443	-	53	0	9.03943	1.69034e-15	2.06502e-14	Up	Intron (ENSMUST00000044260/ENSMUSG00000033364, intron 4 of 23)	ENSMUSG00000033364	ENSMUST00000188012	Usp37	ubiquitin specific peptidase 37	4932415L06Rik|C330008N13Rik
1_74451281_74452598	1318	-	1_74451281_74452598	0	97	-9.34794	3.00402e-17	5.62136e-16	Down	Intron (ENSMUST00000044260/ENSMUSG00000033364, intron 5 of 23)	ENSMUSG00000033364	ENSMUST00000188012	Usp37	ubiquitin specific peptidase 37	4932415L06Rik|C330008N13Rik
1_74453197_74453625	429	-	1_74453197_74453625	0	33	-7.79671	5.23325e-07	9.17763e-07	Down	Intron (ENSMUST00000044260/ENSMUSG00000033364, intron 6 of 23)	ENSMUSG00000033364	ENSMUST00000188012	Usp37	ubiquitin specific peptidase 37	4932415L06Rik|C330008N13Rik
1_74455440_74457663	2224	1_74455440_74456203;1_74456581_74457663	1_74455601_74456613;1_74456889_74457429	200	147	1.0064	0.000103055	0.00014793	Up	Exon (ENSMUST00000044260/ENSMUSG00000033364, exon 17 of 24)	ENSMUSG00000033364	ENSMUST00000188012	Usp37	ubiquitin specific peptidase 37	4932415L06Rik|C330008N13Rik
1_74458880_74459279	400	1_74458880_74459279	-	38	0	8.56052	9.60067e-12	4.38615e-11	Up	Intron (ENSMUST00000044260/ENSMUSG00000033364, intron 8 of 23)	ENSMUSG00000033364	ENSMUST00000188012	Usp37	ubiquitin specific peptidase 37	4932415L06Rik|C330008N13Rik
1_74491153_74491483	331	1_74491153_74491483	-	37	0	8.52215	1.63617e-11	7.0045e-11	Up	Intron (ENSMUST00000044260/ENSMUSG00000033364, intron 20 of 23)	ENSMUSG00000033364	ENSMUST00000195478	Usp37	ubiquitin specific peptidase 37	4932415L06Rik|C330008N13Rik
1_74547081_74547464	384	-	1_74547081_74547464	0	29	-7.61119	2.75402e-06	4.40215e-06	Down	Intron (ENSMUST00000067916/ENSMUSG00000026173, intron 1 of 16)	ENSMUSG00000026173	ENSMUST00000027362	Plcd4	phospholipase C, delta 4	4921507K24Rik
1_74547635_74548502	868	-	1_74547635_74548502	0	66	-8.79346	2.7628e-13	1.91851e-12	Down	5' UTR	ENSMUSG00000026173	ENSMUST00000027362	Plcd4	phospholipase C, delta 4	4921507K24Rik
1_74583173_74583483	311	-	1_74583173_74583483	0	18	-6.92763	9.96168e-05	0.000143077	Down	Exon (ENSMUST00000136865/ENSMUSG00000026135, exon 3 of 3)	ENSMUSG00000026135	ENSMUST00000127921	Zfp142	zinc finger protein 142	9330177B18Rik|BB154236|mKIAA0236
1_74586797_74588102	1306	1_74587387_74588012	1_74586797_74588102	89	275	-1.06375	7.58286e-05	0.000109416	Down	Promoter (<=1kb)	ENSMUSG00000026135	ENSMUST00000113737	Zfp142	zinc finger protein 142	9330177B18Rik|BB154236|mKIAA0236
1_74806821_74807595	775	-	1_74806821_74807595	0	57	-8.58247	8.60156e-12	4.14024e-11	Down	Downstream (2-3kb)	ENSMUSG00000026167	ENSMUST00000187238	Wnt10a	wingless-type MMTV integration site family, member 10A	-
1_74814577_74814970	394	-	1_74814577_74814970	0	37	-7.96106	5.909e-08	1.17873e-07	Down	Distal Intergenic	ENSMUSG00000026167	ENSMUST00000187238	Wnt10a	wingless-type MMTV integration site family, member 10A	-
1_74820303_74820940	638	-	1_74820303_74820940	0	61	-8.68007	1.9438e-12	1.10472e-11	Down	Distal Intergenic	ENSMUSG00000026167	ENSMUST00000187238	Wnt10a	wingless-type MMTV integration site family, member 10A	-
1_74832105_74832383	279	1_74832105_74832383	-	28	0	8.12131	7.04361e-09	1.66011e-08	Up	Distal Intergenic	ENSMUSG00000089964	ENSMUST00000159627	Gm16582	-	-
1_74843889_74844270	382	1_74843889_74844270	-	31	0	8.26765	7.42892e-10	2.14936e-09	Up	Distal Intergenic	ENSMUSG00000089964	ENSMUST00000159627	Gm16582	-	-
1_74846044_74847008	965	1_74846044_74846712	1_74846472_74847008	69	50	1.02544	0.00303552	0.00408795	Up	Distal Intergenic	ENSMUSG00000089964	ENSMUST00000159627	Gm16582	-	-
1_74860973_74861331	359	-	1_74860973_74861331	0	34	-7.83958	3.02271e-07	5.50653e-07	Down	Intron (ENSMUST00000159627/ENSMUSG00000089964, intron 2 of 3)	ENSMUSG00000089964	ENSMUST00000160379	Gm16582	-	-
1_74898063_74898383	321	1_74898063_74898383	-	38	0	8.56052	9.60067e-12	4.38615e-11	Up	Downstream (2-3kb)	ENSMUSG00000065616	ENSMUST00000083682	Mir375	microRNA 375	Mirn375|mir-375|mmu-mir-375
1_74918775_74920632	1858	1_74920125_74920632	1_74918775_74920430	49	181	-1.3204	1.68114e-05	2.50247e-05	Down	Exon (ENSMUST00000094844/ENSMUSG00000047021, exon 14 of 33)	ENSMUSG00000047021	ENSMUST00000130489	Cfap65	cilia and flagella associated protein 65	A230051F10|B230363K08Rik|Ccdc108
1_74920768_74921415	648	-	1_74920768_74921415	0	46	-8.27404	1.42755e-09	3.85364e-09	Down	Intron (ENSMUST00000094844/ENSMUSG00000047021, intron 20 of 32)	ENSMUSG00000047021	ENSMUST00000130489	Cfap65	cilia and flagella associated protein 65	A230051F10|B230363K08Rik|Ccdc108
1_75133351_75133689	339	1_75133351_75133689	-	23	0	7.83864	2.27396e-07	4.21299e-07	Up	Promoter (<=1kb)	ENSMUSG00000026205	ENSMUST00000188080	Slc23a3	solute carrier family 23 (nucleobase transporters), member 3	SVCT3|Yspl1
1_75141220_75143559	2340	1_75142157_75142713	1_75141220_75143559	79	557	-2.25334	1.16418e-17	2.41803e-16	Down	Promoter (<=1kb)	ENSMUSG00000033159	ENSMUST00000168720	Cnppd1	cyclin Pas1/PHO80 domain containing 1	1810031K17Rik|AU043960
1_75179733_75180350	618	-	1_75179733_75180350	0	63	-8.7265	7.2951e-13	4.64356e-12	Down	Promoter (<=1kb)	ENSMUSG00000026198	ENSMUST00000160081	Abcb6	ATP-binding cassette, sub-family B (MDR/TAP), member 6	1200005B17Rik
1_75191073_75191615	543	-	1_75191073_75191615	0	44	-8.21012	2.41201e-09	6.33597e-09	Down	Promoter (<=1kb)	ENSMUSG00000026199	ENSMUST00000151887	Ankzf1	ankyrin repeat and zinc finger domain containing 1	1300008P06Rik|2810025E10Rik|D1Ertd161e
1_75193827_75194105	279	1_75193827_75194105	-	31	0	8.26765	7.42892e-10	2.14936e-09	Up	Promoter (1-2kb)	ENSMUSG00000026199	ENSMUST00000127860	Ankzf1	ankyrin repeat and zinc finger domain containing 1	1300008P06Rik|2810025E10Rik|D1Ertd161e
1_75210213_75211601	1389	1_75210833_75211071	1_75210213_75211601	26	191	-2.30957	7.74196e-12	3.81914e-11	Down	Promoter (<=1kb)	ENSMUSG00000026200	ENSMUST00000155716	Glb1l	galactosidase, beta 1-like	4833408P15Rik
1_75218607_75219197	591	-	1_75218607_75219197	0	82	-9.10598	3.93677e-16	5.44693e-15	Down	Promoter (<=1kb)	ENSMUSG00000026202	ENSMUST00000079464	Tuba4a	tubulin, alpha 4A	M[a]4|Tuba4
1_75236454_75237584	1131	1_75236472_75236888	1_75236454_75237584	89	295	-1.16498	1.49916e-05	2.24253e-05	Down	Promoter (<=1kb)	ENSMUSG00000026203	ENSMUST00000055223	Dnajb2	DnaJ heat shock protein family (Hsp40) member B2	2700059H22Rik|Dnajb10|Hsj1|mDj8
1_75240049_75240406	358	-	1_75240049_75240406	0	32	-7.75251	9.08175e-07	1.53104e-06	Down	Promoter (1-2kb)	ENSMUSG00000026203	ENSMUST00000190445	Dnajb2	DnaJ heat shock protein family (Hsp40) member B2	2700059H22Rik|Dnajb10|Hsj1|mDj8
1_75243402_75243923	522	1_75243402_75243923	-	47	0	8.86645	5.41924e-14	4.56184e-13	Up	3' UTR	ENSMUSG00000026203	ENSMUST00000190445	Dnajb2	DnaJ heat shock protein family (Hsp40) member B2	2700059H22Rik|Dnajb10|Hsj1|mDj8
1_75245163_75245586	424	1_75245163_75245586	-	49	0	8.92644	1.20778e-14	1.17285e-13	Up	3' UTR	ENSMUSG00000026203	ENSMUST00000190445	Dnajb2	DnaJ heat shock protein family (Hsp40) member B2	2700059H22Rik|Dnajb10|Hsj1|mDj8
1_75246863_75247352	490	1_75246863_75247352	-	38	0	8.56052	9.60067e-12	4.38615e-11	Up	3' UTR	ENSMUSG00000101840	ENSMUST00000191154	Gm28294	-	-
1_75250338_75250665	328	1_75250338_75250625	1_75250350_75250665	34	25	1.00226	0.0300003	0.0376048	Up	Promoter (1-2kb)	ENSMUSG00000101840	ENSMUST00000191154	Gm28294	-	-
1_75264229_75264637	409	-	1_75264229_75264637	0	31	-7.70693	9.08175e-07	1.53104e-06	Down	Promoter (<=1kb)	ENSMUSG00000026204	ENSMUST00000185849	Ptprn	protein tyrosine phosphatase, receptor type, N	IA-2|mIA-A|mKIAA4064
1_75312868_75313178	311	-	1_75312868_75313178	0	20	-7.07845	2.86152e-05	4.18444e-05	Down	Intron (ENSMUST00000066668/ENSMUSG00000026209, intron 5 of 14)	ENSMUSG00000026209	ENSMUST00000186278	Dnpep	aspartyl aminopeptidase	AA407814
1_75318116_75318626	511	-	1_75318116_75318626	0	51	-8.42245	1.79489e-10	6.15694e-10	Down	Promoter (<=1kb)	ENSMUSG00000026209	ENSMUST00000188652	Dnpep	aspartyl aminopeptidase	AA407814
1_75319619_75320152	534	-	1_75319619_75320152	0	39	-8.03672	3.4461e-08	7.26383e-08	Down	Distal Intergenic	ENSMUSG00000026209	ENSMUST00000188652	Dnpep	aspartyl aminopeptidase	AA407814
1_75320360_75320621	262	1_75320360_75320621	-	28	0	8.12131	7.04361e-09	1.66011e-08	Up	Distal Intergenic	ENSMUSG00000026209	ENSMUST00000188652	Dnpep	aspartyl aminopeptidase	AA407814
1_75337634_75337905	272	1_75337634_75337905	-	33	0	8.35756	2.45934e-10	8.02848e-10	Up	Distal Intergenic	ENSMUSG00000026209	ENSMUST00000188652	Dnpep	aspartyl aminopeptidase	AA407814
1_75338456_75338760	305	1_75338456_75338760	-	30	0	8.2205	1.29729e-09	3.54454e-09	Up	Distal Intergenic	ENSMUSG00000026209	ENSMUST00000188652	Dnpep	aspartyl aminopeptidase	AA407814
1_75338966_75339883	918	1_75338966_75339883	1_75339181_75339630	77	39	1.54072	1.43049e-05	2.16355e-05	Up	Distal Intergenic	ENSMUSG00000026208	ENSMUST00000027409	Des	desmin	-
1_75371285_75371526	242	1_75371285_75371526	-	23	0	7.83864	2.27396e-07	4.21299e-07	Up	Promoter (1-2kb)	ENSMUSG00000085653	ENSMUST00000130095	Gm15179	predicted gene 15179	-
1_75373052_75373480	429	1_75373052_75373480	-	43	0	8.73841	4.15962e-13	2.73662e-12	Up	Promoter (1-2kb)	ENSMUSG00000026207	ENSMUST00000087122	Speg	SPEG complex locus	AW125581|Apeg1|BPEG|D1Bwg1450e|SPEGalpha|SPEGbeta|mKIAA1297
1_75376200_75376841	642	-	1_75376200_75376841	0	40	-8.0731	2.01468e-08	4.43681e-08	Down	Intron (ENSMUST00000087122/ENSMUSG00000026207, intron 1 of 40)	ENSMUSG00000026207	ENSMUST00000087122	Speg	SPEG complex locus	AW125581|Apeg1|BPEG|D1Bwg1450e|SPEGalpha|SPEGbeta|mKIAA1297
1_75377704_75378218	515	1_75377704_75378218	-	44	0	8.7715	2.48909e-13	1.74548e-12	Up	Intron (ENSMUST00000087122/ENSMUSG00000026207, intron 1 of 40)	ENSMUSG00000026207	ENSMUST00000087122	Speg	SPEG complex locus	AW125581|Apeg1|BPEG|D1Bwg1450e|SPEGalpha|SPEGbeta|mKIAA1297
1_75390096_75390362	267	1_75390096_75390362	-	32	0	8.31331	4.26767e-10	1.30949e-09	Up	Intron (ENSMUST00000087122/ENSMUSG00000026207, intron 4 of 40)	ENSMUSG00000026207	ENSMUST00000137868	Speg	SPEG complex locus	AW125581|Apeg1|BPEG|D1Bwg1450e|SPEGalpha|SPEGbeta|mKIAA1297
1_75398333_75398624	292	1_75398333_75398624	-	30	0	8.2205	1.29729e-09	3.54454e-09	Up	Promoter (1-2kb)	ENSMUSG00000026207	ENSMUST00000113589	Speg	SPEG complex locus	AW125581|Apeg1|BPEG|D1Bwg1450e|SPEGalpha|SPEGbeta|mKIAA1297
1_75402834_75403461	628	1_75402834_75403459	1_75403085_75403461	53	25	1.64119	3.61438e-05	5.27073e-05	Up	Intron (ENSMUST00000087122/ENSMUSG00000026207, intron 9 of 40)	ENSMUSG00000026207	ENSMUST00000122266	Speg	SPEG complex locus	AW125581|Apeg1|BPEG|D1Bwg1450e|SPEGalpha|SPEGbeta|mKIAA1297
1_75404913_75405203	291	1_75404913_75405203	-	25	0	7.95843	3.94049e-08	8.10452e-08	Up	Exon (ENSMUST00000087122/ENSMUSG00000026207, exon 10 of 41)	ENSMUSG00000026207	ENSMUST00000122266	Speg	SPEG complex locus	AW125581|Apeg1|BPEG|D1Bwg1450e|SPEGalpha|SPEGbeta|mKIAA1297
1_75406281_75407249	969	-	1_75406281_75407249	0	72	-8.91872	2.53516e-14	2.39785e-13	Down	Exon (ENSMUST00000087122/ENSMUSG00000026207, exon 11 of 41)	ENSMUSG00000026207	ENSMUST00000122266	Speg	SPEG complex locus	AW125581|Apeg1|BPEG|D1Bwg1450e|SPEGalpha|SPEGbeta|mKIAA1297
1_75410480_75410828	349	-	1_75410480_75410828	0	25	-7.39824	2.59951e-05	3.8153e-05	Down	Exon (ENSMUST00000087122/ENSMUSG00000026207, exon 16 of 41)	ENSMUSG00000026207	ENSMUST00000122266	Speg	SPEG complex locus	AW125581|Apeg1|BPEG|D1Bwg1450e|SPEGalpha|SPEGbeta|mKIAA1297
1_75410921_75411162	242	1_75410921_75411162	-	31	0	8.26765	7.42892e-10	2.14936e-09	Up	Exon (ENSMUST00000087122/ENSMUSG00000026207, exon 17 of 41)	ENSMUSG00000026207	ENSMUST00000122266	Speg	SPEG complex locus	AW125581|Apeg1|BPEG|D1Bwg1450e|SPEGalpha|SPEGbeta|mKIAA1297
1_75412614_75412863	250	1_75412614_75412863	-	29	0	8.17176	3.99443e-09	1.00658e-08	Up	Intron (ENSMUST00000087122/ENSMUSG00000026207, intron 18 of 40)	ENSMUSG00000026207	ENSMUST00000143679	Speg	SPEG complex locus	AW125581|Apeg1|BPEG|D1Bwg1450e|SPEGalpha|SPEGbeta|mKIAA1297
1_75413186_75413782	597	-	1_75413186_75413782	0	55	-8.53107	2.34568e-11	9.9103e-11	Down	Intron (ENSMUST00000087122/ENSMUSG00000026207, intron 18 of 40)	ENSMUSG00000026207	ENSMUST00000143679	Speg	SPEG complex locus	AW125581|Apeg1|BPEG|D1Bwg1450e|SPEGalpha|SPEGbeta|mKIAA1297
1_75423770_75424122	353	1_75423770_75424122	-	38	0	8.56052	9.60067e-12	4.38615e-11	Up	Promoter (<=1kb)	ENSMUSG00000026207	ENSMUST00000143679	Speg	SPEG complex locus	AW125581|Apeg1|BPEG|D1Bwg1450e|SPEGalpha|SPEGbeta|mKIAA1297
1_75426189_75427238	1050	1_75426189_75427199	1_75426794_75427238	90	29	2.19105	1.14388e-09	3.26029e-09	Up	Exon (ENSMUST00000087122/ENSMUSG00000026207, exon 32 of 41)	ENSMUSG00000026207	ENSMUST00000143679	Speg	SPEG complex locus	AW125581|Apeg1|BPEG|D1Bwg1450e|SPEGalpha|SPEGbeta|mKIAA1297
1_75428381_75428619	239	1_75428381_75428619	-	19	0	7.56433	1.3552e-06	2.2703e-06	Up	Exon (ENSMUST00000087122/ENSMUSG00000026207, exon 36 of 41)	ENSMUSG00000026207	ENSMUST00000143679	Speg	SPEG complex locus	AW125581|Apeg1|BPEG|D1Bwg1450e|SPEGalpha|SPEGbeta|mKIAA1297
1_75435546_75436369	824	1_75435565_75435826	1_75435546_75436369	28	97	-1.22663	0.000713538	0.000992193	Down	Promoter (<=1kb)	ENSMUSG00000033021	ENSMUST00000037796	Gmppa	GDP-mannose pyrophosphorylase A	1810012N01Rik
1_75436982_75437324	343	-	1_75436982_75437324	0	47	-8.30497	8.46962e-10	2.41856e-09	Down	Promoter (<=1kb)	ENSMUSG00000033021	ENSMUST00000188097	Gmppa	GDP-mannose pyrophosphorylase A	1810012N01Rik
1_75440052_75440587	536	-	1_75440052_75440587	0	42	-8.14324	6.93678e-09	1.66011e-08	Down	Promoter (1-2kb)	ENSMUSG00000033021	ENSMUST00000132291	Gmppa	GDP-mannose pyrophosphorylase A	1810012N01Rik
1_75441217_75441594	378	1_75441217_75441594	-	28	0	8.12131	7.04361e-09	1.66011e-08	Up	Promoter (<=1kb)	ENSMUSG00000033021	ENSMUST00000132291	Gmppa	GDP-mannose pyrophosphorylase A	1810012N01Rik
1_75444276_75444703	428	1_75444276_75444703	-	48	0	8.89676	3.27725e-14	2.96107e-13	Up	Downstream (1-2kb)	ENSMUSG00000033021	ENSMUST00000124539	Gmppa	GDP-mannose pyrophosphorylase A	1810012N01Rik
1_75448801_75449146	346	-	1_75448801_75449146	0	50	-8.39396	1.79489e-10	6.15694e-10	Down	Promoter (1-2kb)	ENSMUSG00000033007	ENSMUST00000113577	Asic4	acid-sensing (proton-gated) ion channel family member 4	Accn4|BNAC4
1_75458107_75459526	1420	1_75458574_75458841	1_75458107_75459526	33	102	-1.06278	0.00234956	0.00318338	Down	Intron (ENSMUST00000113577/ENSMUSG00000033007, intron 1 of 8)	ENSMUSG00000033007	ENSMUST00000037708	Asic4	acid-sensing (proton-gated) ion channel family member 4	Accn4|BNAC4
1_75503543_75504190	648	-	1_75503543_75504190	0	38	-7.99939	5.909e-08	1.17873e-07	Down	Promoter (<=1kb)	ENSMUSG00000026211	ENSMUST00000127507	Obsl1	obscurin-like 1	AW822216
1_75508786_75509111	326	1_75508786_75509111	-	40	0	8.63433	3.33429e-12	1.75371e-11	Up	Intron (ENSMUST00000037330/ENSMUSG00000032968, intron 1 of 1)	ENSMUSG00000032968	ENSMUST00000037330	Inha	inhibin alpha	AW555078
1_75524966_75525485	520	-	1_75524966_75525485	0	46	-8.27404	1.42755e-09	3.85364e-09	Down	Exon (ENSMUST00000027414/ENSMUSG00000026213, exon 4 of 25)	ENSMUSG00000026213	ENSMUST00000129794	Stk11ip	serine/threonine kinase 11 interacting protein	1200014D22Rik|BB131189|LIP1|LKB1IP
1_75528029_75528474	446	1_75528029_75528474	-	34	0	8.4005	1.42164e-10	4.99774e-10	Up	Promoter (<=1kb)	ENSMUSG00000026213	ENSMUST00000129794	Stk11ip	serine/threonine kinase 11 interacting protein	1200014D22Rik|BB131189|LIP1|LKB1IP
1_75545994_75546864	871	-	1_75545994_75546864	0	88	-9.20768	4.17918e-17	7.44633e-16	Down	Promoter (<=1kb)	ENSMUSG00000006576	ENSMUST00000124341	Slc4a3	solute carrier family 4 (anion exchanger), member 3	A930038D23Rik|Ae3
1_75558730_75559572	843	-	1_75558730_75559572	0	116	-9.60564	4.31189e-20	1.53586e-18	Down	3' UTR	ENSMUSG00000006576	ENSMUST00000132110	Slc4a3	solute carrier family 4 (anion exchanger), member 3	A930038D23Rik|Ae3
1_75600163_75600730	568	1_75600163_75600730	-	46	0	8.83549	8.98453e-14	7.11197e-13	Up	Distal Intergenic	ENSMUSG00000082528	ENSMUST00000120832	Gm15182	-	-
1_75602276_75603429	1154	-	1_75602276_75603429	0	100	-9.39181	8.52741e-18	1.86587e-16	Down	Distal Intergenic	ENSMUSG00000082528	ENSMUST00000120832	Gm15182	-	-
1_75605381_75605793	413	-	1_75605381_75605793	0	36	-7.9217	1.01568e-07	1.94955e-07	Down	Distal Intergenic	ENSMUSG00000082528	ENSMUST00000120832	Gm15182	-	-
1_75614118_75614816	699	1_75614285_75614816	1_75614118_75614428	52	36	1.09031	0.00483422	0.00642382	Up	Distal Intergenic	ENSMUSG00000082528	ENSMUST00000120832	Gm15182	-	-
1_75617054_75617635	582	-	1_75617054_75617635	0	49	-8.3649	3.00325e-10	9.67805e-10	Down	Distal Intergenic	ENSMUSG00000082528	ENSMUST00000120832	Gm15182	-	-
1_75706373_75706706	334	1_75706373_75706706	-	35	0	8.4422	8.24314e-11	3.08621e-10	Up	Distal Intergenic	ENSMUSG00000082012	ENSMUST00000121823	Gm5257	-	-
1_75772000_75772361	362	-	1_75772000_75772361	0	28	-7.56082	4.812e-06	7.49864e-06	Down	Distal Intergenic	ENSMUSG00000082012	ENSMUST00000121823	Gm5257	-	-
1_75786145_75786721	577	1_75786145_75786721	-	64	0	9.31104	3.67317e-18	8.74993e-17	Up	Distal Intergenic	ENSMUSG00000082012	ENSMUST00000121823	Gm5257	-	-
1_75799371_75799952	582	1_75799371_75799952	-	53	0	9.03943	1.69034e-15	2.06502e-14	Up	Distal Intergenic	ENSMUSG00000082012	ENSMUST00000121823	Gm5257	-	-
1_75801656_75802132	477	-	1_75801656_75802132	0	43	-8.17707	4.08541e-09	1.01592e-08	Down	Distal Intergenic	ENSMUSG00000082012	ENSMUST00000121823	Gm5257	-	-
1_76027398_76027839	442	-	1_76027398_76027839	0	29	-7.61119	2.75402e-06	4.40215e-06	Down	Distal Intergenic	ENSMUSG00000099996	ENSMUST00000188786	Gm29065	-	-
1_76035674_76036145	472	-	1_76035674_76036145	0	50	-8.39396	1.79489e-10	6.15694e-10	Down	Distal Intergenic	ENSMUSG00000099996	ENSMUST00000188786	Gm29065	-	-
1_76036436_76040132	3697	1_76036436_76036892;1_76039448_76039719	1_76036542_76040132	49	420	-2.53412	1.03044e-18	2.77245e-17	Down	Distal Intergenic	ENSMUSG00000099996	ENSMUST00000188786	Gm29065	-	-
1_76040289_76040723	435	-	1_76040289_76040723	0	39	-8.03672	3.4461e-08	7.26383e-08	Down	Distal Intergenic	ENSMUSG00000099996	ENSMUST00000188786	Gm29065	-	-
1_76430135_76430635	501	-	1_76430135_76430635	0	29	-7.61119	2.75402e-06	4.40215e-06	Down	Intron (ENSMUST00000185857/ENSMUSG00000100827, intron 1 of 1)	ENSMUSG00000100827	ENSMUST00000185857	Gm29069	-	-
1_76875674_76876712	1039	-	1_76875674_76876712	0	84	-9.14068	2.50387e-16	3.62401e-15	Down	Distal Intergenic	ENSMUSG00000100534	ENSMUST00000191156	Gm816	-	-
1_77110000_77110326	327	-	1_77110000_77110326	0	25	-7.39824	2.59951e-05	3.8153e-05	Down	Distal Intergenic	ENSMUSG00000089326	ENSMUST00000158701	Gm25974	-	-
1_77406912_77407200	289	1_77406912_77407200	-	22	0	7.7748	4.1078e-07	7.32295e-07	Up	Intron (ENSMUST00000027451/ENSMUSG00000026235, intron 13 of 17)	ENSMUSG00000026235	ENSMUST00000187346	Epha4	Eph receptor A4	2900005C20Rik|AI385584|Cek8|Hek8|Sek|Sek1|Tyro1|rb
1_77413432_77413744	313	1_77413432_77413744	-	29	0	8.17176	3.99443e-09	1.00658e-08	Up	Intron (ENSMUST00000027451/ENSMUSG00000026235, intron 13 of 17)	ENSMUSG00000026235	ENSMUST00000187346	Epha4	Eph receptor A4	2900005C20Rik|AI385584|Cek8|Hek8|Sek|Sek1|Tyro1|rb
1_77416776_77417014	239	1_77416776_77417014	-	23	0	7.83864	2.27396e-07	4.21299e-07	Up	Intron (ENSMUST00000027451/ENSMUSG00000026235, intron 13 of 17)	ENSMUSG00000026235	ENSMUST00000187346	Epha4	Eph receptor A4	2900005C20Rik|AI385584|Cek8|Hek8|Sek|Sek1|Tyro1|rb
1_77421241_77421668	428	1_77421241_77421668	-	33	0	8.35756	2.45934e-10	8.02848e-10	Up	Intron (ENSMUST00000027451/ENSMUSG00000026235, intron 13 of 17)	ENSMUSG00000026235	ENSMUST00000187346	Epha4	Eph receptor A4	2900005C20Rik|AI385584|Cek8|Hek8|Sek|Sek1|Tyro1|rb
1_77436958_77437314	357	1_77436958_77437314	-	30	0	8.2205	1.29729e-09	3.54454e-09	Up	Intron (ENSMUST00000027451/ENSMUSG00000026235, intron 14 of 17)	ENSMUSG00000026235	ENSMUST00000187346	Epha4	Eph receptor A4	2900005C20Rik|AI385584|Cek8|Hek8|Sek|Sek1|Tyro1|rb
1_77439922_77440538	617	-	1_77439922_77440538	0	37	-7.96106	5.909e-08	1.17873e-07	Down	Intron (ENSMUST00000027451/ENSMUSG00000026235, intron 14 of 17)	ENSMUSG00000026235	ENSMUST00000184495	Epha4	Eph receptor A4	2900005C20Rik|AI385584|Cek8|Hek8|Sek|Sek1|Tyro1|rb
1_77441140_77441529	390	1_77441140_77441529	-	31	0	8.26765	7.42892e-10	2.14936e-09	Up	Intron (ENSMUST00000027451/ENSMUSG00000026235, intron 14 of 17)	ENSMUSG00000026235	ENSMUST00000184495	Epha4	Eph receptor A4	2900005C20Rik|AI385584|Cek8|Hek8|Sek|Sek1|Tyro1|rb
1_77443011_77443282	272	1_77443011_77443282	-	33	0	8.35756	2.45934e-10	8.02848e-10	Up	Intron (ENSMUST00000027451/ENSMUSG00000026235, intron 14 of 17)	ENSMUSG00000026235	ENSMUST00000184495	Epha4	Eph receptor A4	2900005C20Rik|AI385584|Cek8|Hek8|Sek|Sek1|Tyro1|rb
1_77445006_77445316	311	-	1_77445006_77445316	0	23	-7.27869	4.53786e-06	7.16963e-06	Down	3' UTR	ENSMUSG00000099141	ENSMUST00000184495	Mir6352	microRNA 6352	Gm27481|mmu-mir-6352
1_77446129_77446393	265	1_77446129_77446393	-	30	0	8.2205	1.29729e-09	3.54454e-09	Up	Intron (ENSMUST00000027451/ENSMUSG00000026235, intron 15 of 17)	ENSMUSG00000026235	ENSMUST00000184495	Epha4	Eph receptor A4	2900005C20Rik|AI385584|Cek8|Hek8|Sek|Sek1|Tyro1|rb
1_77446558_77446808	251	1_77446558_77446808	-	24	0	7.89978	7.04324e-08	1.37487e-07	Up	Intron (ENSMUST00000027451/ENSMUSG00000026235, intron 15 of 17)	ENSMUSG00000026235	ENSMUST00000184495	Epha4	Eph receptor A4	2900005C20Rik|AI385584|Cek8|Hek8|Sek|Sek1|Tyro1|rb
1_77450969_77451280	312	1_77450969_77451280	-	22	0	7.7748	4.1078e-07	7.32295e-07	Up	Intron (ENSMUST00000027451/ENSMUSG00000026235, intron 15 of 17)	ENSMUSG00000026235	ENSMUST00000184495	Epha4	Eph receptor A4	2900005C20Rik|AI385584|Cek8|Hek8|Sek|Sek1|Tyro1|rb
1_77452815_77453127	313	1_77452815_77453127	-	30	0	8.2205	1.29729e-09	3.54454e-09	Up	Intron (ENSMUST00000027451/ENSMUSG00000026235, intron 15 of 17)	ENSMUSG00000026235	ENSMUST00000184495	Epha4	Eph receptor A4	2900005C20Rik|AI385584|Cek8|Hek8|Sek|Sek1|Tyro1|rb
1_77455685_77457317	1633	1_77455685_77457157	1_77455974_77456396;1_77456858_77457317	117	67	1.36527	5.46034e-06	8.49808e-06	Up	Intron (ENSMUST00000027451/ENSMUSG00000026235, intron 15 of 17)	ENSMUSG00000026235	ENSMUST00000184495	Epha4	Eph receptor A4	2900005C20Rik|AI385584|Cek8|Hek8|Sek|Sek1|Tyro1|rb
1_77457710_77458889	1180	-	1_77457710_77458889	0	71	-8.89858	4.06981e-14	3.58689e-13	Down	Intron (ENSMUST00000027451/ENSMUSG00000026235, intron 15 of 17)	ENSMUSG00000026235	ENSMUST00000184495	Epha4	Eph receptor A4	2900005C20Rik|AI385584|Cek8|Hek8|Sek|Sek1|Tyro1|rb
1_77459745_77460178	434	1_77459745_77460178	-	45	0	8.80385	1.49345e-13	1.11491e-12	Up	Intron (ENSMUST00000027451/ENSMUSG00000026235, intron 15 of 17)	ENSMUSG00000026235	ENSMUST00000184495	Epha4	Eph receptor A4	2900005C20Rik|AI385584|Cek8|Hek8|Sek|Sek1|Tyro1|rb
1_77464276_77465061	786	1_77464276_77465061	-	74	0	9.52018	1.76288e-20	6.96056e-19	Up	Intron (ENSMUST00000027451/ENSMUSG00000026235, intron 15 of 17)	ENSMUSG00000026235	ENSMUST00000184495	Epha4	Eph receptor A4	2900005C20Rik|AI385584|Cek8|Hek8|Sek|Sek1|Tyro1|rb
1_77466088_77466430	343	-	1_77466088_77466430	0	25	-7.39824	2.59951e-05	3.8153e-05	Down	Intron (ENSMUST00000027451/ENSMUSG00000026235, intron 15 of 17)	ENSMUSG00000026235	ENSMUST00000184495	Epha4	Eph receptor A4	2900005C20Rik|AI385584|Cek8|Hek8|Sek|Sek1|Tyro1|rb
1_77467568_77468241	674	1_77467568_77468241	-	64	0	9.31104	3.67317e-18	8.74993e-17	Up	Intron (ENSMUST00000027451/ENSMUSG00000026235, intron 15 of 17)	ENSMUSG00000026235	ENSMUST00000184495	Epha4	Eph receptor A4	2900005C20Rik|AI385584|Cek8|Hek8|Sek|Sek1|Tyro1|rb
1_77474846_77475107	262	1_77474846_77475107	-	28	0	8.12131	7.04361e-09	1.66011e-08	Up	Intron (ENSMUST00000027451/ENSMUSG00000026235, intron 15 of 17)	ENSMUSG00000026235	ENSMUST00000184495	Epha4	Eph receptor A4	2900005C20Rik|AI385584|Cek8|Hek8|Sek|Sek1|Tyro1|rb
1_77499849_77500087	239	1_77499849_77500087	-	24	0	7.89978	7.04324e-08	1.37487e-07	Up	Intron (ENSMUST00000027451/ENSMUSG00000026235, intron 15 of 17)	ENSMUSG00000026235	ENSMUST00000184495	Epha4	Eph receptor A4	2900005C20Rik|AI385584|Cek8|Hek8|Sek|Sek1|Tyro1|rb
1_77501140_77501453	314	1_77501140_77501453	-	35	0	8.4422	8.24314e-11	3.08621e-10	Up	Intron (ENSMUST00000027451/ENSMUSG00000026235, intron 15 of 17)	ENSMUSG00000026235	ENSMUST00000184495	Epha4	Eph receptor A4	2900005C20Rik|AI385584|Cek8|Hek8|Sek|Sek1|Tyro1|rb
1_77501644_77501943	300	1_77501644_77501943	-	28	0	8.12131	7.04361e-09	1.66011e-08	Up	Intron (ENSMUST00000027451/ENSMUSG00000026235, intron 15 of 17)	ENSMUSG00000026235	ENSMUST00000184495	Epha4	Eph receptor A4	2900005C20Rik|AI385584|Cek8|Hek8|Sek|Sek1|Tyro1|rb
1_77503118_77503592	475	1_77503118_77503592	-	51	0	8.98404	4.49613e-15	4.86904e-14	Up	Intron (ENSMUST00000027451/ENSMUSG00000026235, intron 15 of 17)	ENSMUSG00000026235	ENSMUST00000184495	Epha4	Eph receptor A4	2900005C20Rik|AI385584|Cek8|Hek8|Sek|Sek1|Tyro1|rb
1_77506979_77507273	295	1_77506979_77507273	-	25	0	7.95843	3.94049e-08	8.10452e-08	Up	3' UTR	ENSMUSG00000101849	ENSMUST00000189147	Gm28386	-	-
1_77512504_77512904	401	1_77512504_77512904	1_77512518_77512828	38	26	1.10602	0.013018	0.0168099	Up	Intron (ENSMUST00000027451/ENSMUSG00000026235, intron 17 of 17)	ENSMUSG00000026235	ENSMUST00000189147	Epha4	Eph receptor A4	2900005C20Rik|AI385584|Cek8|Hek8|Sek|Sek1|Tyro1|rb
1_77544816_77545111	296	1_77544816_77545111	-	34	0	8.4005	1.42164e-10	4.99774e-10	Up	Distal Intergenic	ENSMUSG00000101506	ENSMUST00000185671	Gm28385	-	-
1_77549150_77549560	411	-	1_77549150_77549560	0	28	-7.56082	4.812e-06	7.49864e-06	Down	Distal Intergenic	ENSMUSG00000101506	ENSMUST00000185671	Gm28385	-	-
1_77555022_77555385	364	1_77555022_77555385	-	35	0	8.4422	8.24314e-11	3.08621e-10	Up	Distal Intergenic	ENSMUSG00000101506	ENSMUST00000185671	Gm28385	-	-
1_77557295_77557533	239	1_77557295_77557533	-	27	0	8.06903	1.24618e-08	2.79243e-08	Up	Distal Intergenic	ENSMUSG00000101506	ENSMUST00000185671	Gm28385	-	-
1_77628630_77628882	253	1_77628630_77628882	-	26	0	8.01479	2.21221e-08	4.74092e-08	Up	Distal Intergenic	ENSMUSG00000101506	ENSMUST00000185671	Gm28385	-	-
1_77629612_77629949	338	1_77629612_77629949	-	33	0	8.35756	2.45934e-10	8.02848e-10	Up	Distal Intergenic	ENSMUSG00000101506	ENSMUST00000185671	Gm28385	-	-
1_77631718_77632114	397	1_77631718_77632114	-	28	0	8.12131	7.04361e-09	1.66011e-08	Up	Distal Intergenic	ENSMUSG00000101506	ENSMUST00000185671	Gm28385	-	-
1_77636934_77637331	398	1_77636934_77637331	-	30	0	8.2205	1.29729e-09	3.54454e-09	Up	Distal Intergenic	ENSMUSG00000101506	ENSMUST00000185671	Gm28385	-	-
1_78190016_78190326	311	-	1_78190016_78190326	0	29	-7.61119	2.75402e-06	4.40215e-06	Down	Intron (ENSMUST00000004994/ENSMUSG00000004872, intron 5 of 8)	ENSMUSG00000004872	ENSMUST00000004994	Pax3	paired box 3	Pax-3|Sp|Splchl2|splotch
1_78436390_78436847	458	1_78436390_78436847	-	39	0	8.59789	5.64977e-12	2.78967e-11	Up	Intron (ENSMUST00000170217/ENSMUSG00000026245, intron 2 of 17)	ENSMUSG00000026245	ENSMUST00000186625	Farsb	phenylalanyl-tRNA synthetase, beta subunit	C76708|Farsa|Farsl|Farslb|Frsb
1_78479266_78479740	475	-	1_78479266_78479740	0	45	-8.24243	2.41201e-09	6.33597e-09	Down	Intron (ENSMUST00000170217/ENSMUSG00000026245, intron 15 of 17)	ENSMUSG00000026245	ENSMUST00000189931	Farsb	phenylalanyl-tRNA synthetase, beta subunit	C76708|Farsa|Farsl|Farslb|Frsb
1_78488126_78489933	1808	1_78488377_78489685	1_78488126_78489933	181	592	-1.14621	1.63215e-06	2.68735e-06	Down	Promoter (<=1kb)	ENSMUSG00000026245	ENSMUST00000170217	Farsb	phenylalanyl-tRNA synthetase, beta subunit	C76708|Farsa|Farsl|Farslb|Frsb
1_78543961_78544787	827	-	1_78543961_78544787	0	58	-8.60749	8.60156e-12	4.14024e-11	Down	Distal Intergenic	ENSMUSG00000012187	ENSMUST00000125458	Mogat1	monoacylglycerol O-acyltransferase 1	0610030A14Rik|1110064N14Rik|Dgat2l|Dgat2l1|MGAT1|WI1-2612I11.1|mDC2
1_78587210_78587768	559	1_78587210_78587768	-	40	0	8.63433	3.33429e-12	1.75371e-11	Up	Distal Intergenic	ENSMUSG00000099364	ENSMUST00000190504	5730419F03Rik	-	-
1_78598156_78598425	270	1_78598156_78598425	-	28	0	8.12131	7.04361e-09	1.66011e-08	Up	Intron (ENSMUST00000190504/ENSMUSG00000099364, intron 1 of 1)	ENSMUSG00000099364	ENSMUST00000190504	5730419F03Rik	-	-
1_78607502_78607997	496	-	1_78607502_78607997	0	34	-7.83958	3.02271e-07	5.50653e-07	Down	Intron (ENSMUST00000190504/ENSMUSG00000099364, intron 1 of 1)	ENSMUSG00000099364	ENSMUST00000190504	5730419F03Rik	-	-
1_78660676_78661506	831	1_78660676_78661506	-	72	0	9.48071	4.20784e-20	1.51936e-18	Up	Intron (ENSMUST00000035779/ENSMUSG00000032883, intron 1 of 15)	ENSMUSG00000032883	ENSMUST00000151622	Acsl3	acyl-CoA synthetase long-chain family member 3	2610510B12Rik|Acs3|C85929|Facl3|Pro2194
1_78663363_78664247	885	1_78663363_78664247	-	64	0	9.31104	3.67317e-18	8.74993e-17	Up	Intron (ENSMUST00000035779/ENSMUSG00000032883, intron 2 of 15)	ENSMUSG00000032883	ENSMUST00000151622	Acsl3	acyl-CoA synthetase long-chain family member 3	2610510B12Rik|Acs3|C85929|Facl3|Pro2194
1_78664516_78664871	356	1_78664516_78664871	-	29	0	8.17176	3.99443e-09	1.00658e-08	Up	Exon (ENSMUST00000053760/ENSMUSG00000079470, exon 3 of 3)	ENSMUSG00000079470	ENSMUST00000135642	Utp14b	UTP14B small subunit processome component	4932411L21Rik|jsd
1_78666216_78667154	939	-	1_78666216_78667154	0	70	-8.87816	4.06981e-14	3.58689e-13	Down	3' UTR	ENSMUSG00000032883	ENSMUST00000135642	Acsl3	acyl-CoA synthetase long-chain family member 3	2610510B12Rik|Acs3|C85929|Facl3|Pro2194
1_78674523_78675312	790	1_78674523_78675029	1_78674984_78675312	49	26	1.47194	0.000267908	0.000378939	Up	Intron (ENSMUST00000035779/ENSMUSG00000032883, intron 2 of 15)	ENSMUSG00000032883	ENSMUST00000135642	Acsl3	acyl-CoA synthetase long-chain family member 3	2610510B12Rik|Acs3|C85929|Facl3|Pro2194
1_78732868_78733680	813	-	1_78732868_78733680	0	68	-8.83643	1.05572e-13	8.26572e-13	Down	Distal Intergenic	ENSMUSG00000032883	ENSMUST00000148608	Acsl3	acyl-CoA synthetase long-chain family member 3	2610510B12Rik|Acs3|C85929|Facl3|Pro2194
1_79197267_79197942	676	-	1_79197267_79197942	0	45	-8.24243	2.41201e-09	6.33597e-09	Down	Intron (ENSMUST00000189296/ENSMUSG00000099706, intron 3 of 3)	ENSMUSG00000099706	ENSMUST00000189296	Gm29536	predicted gene 29536	-
1_79598466_79598809	344	-	1_79598466_79598809	0	29	-7.61119	2.75402e-06	4.40215e-06	Down	Distal Intergenic	ENSMUSG00000102235	ENSMUST00000195349	Gm37886	-	-
1_79649399_79649802	404	1_79649399_79649802	-	46	0	8.83549	8.98453e-14	7.11197e-13	Up	Intron (ENSMUST00000162342/ENSMUSG00000054702, intron 4 of 4)	ENSMUSG00000054702	ENSMUST00000159312	Ap1s3	adaptor-related protein complex AP-1, sigma 3	1190009B22|Jr2|[s]3A
1_79651795_79652033	239	1_79651795_79652033	-	32	0	8.31331	4.26767e-10	1.30949e-09	Up	Intron (ENSMUST00000162342/ENSMUSG00000054702, intron 4 of 4)	ENSMUSG00000054702	ENSMUST00000159312	Ap1s3	adaptor-related protein complex AP-1, sigma 3	1190009B22|Jr2|[s]3A
1_79671981_79672291	311	-	1_79671981_79672291	0	29	-7.61119	2.75402e-06	4.40215e-06	Down	Promoter (<=1kb)	ENSMUSG00000054702	ENSMUST00000162342	Ap1s3	adaptor-related protein complex AP-1, sigma 3	1190009B22|Jr2|[s]3A
1_79761268_79762404	1137	1_79761385_79761725	1_79761268_79762404	38	161	-1.51754	2.52889e-06	4.1035e-06	Down	Promoter (<=1kb)	ENSMUSG00000073643	ENSMUST00000113512	Wdfy1	WD repeat and FYVE domain containing 1	1700013B03Rik|1700120F24Rik|FENS-1|Jr1|WDF1|ZFYVE17|mKIAA1435
1_80217925_80218269	345	1_80217925_80218269	-	43	0	8.73841	4.15962e-13	2.73662e-12	Up	Exon (ENSMUST00000161427/ENSMUSG00000043230, exon 2 of 4)	ENSMUSG00000043230	ENSMUST00000161427	Fam124b	family with sequence similarity 124, member B	A830043J08Rik
1_80236781_80237589	809	-	1_80236781_80237589	0	62	-8.70347	1.18945e-12	7.10233e-12	Down	Distal Intergenic	ENSMUSG00000101257	ENSMUST00000191452	2310015K22Rik	-	-
1_80238765_80239022	258	1_80238765_80239022	-	22	0	7.7748	4.1078e-07	7.32295e-07	Up	Distal Intergenic	ENSMUSG00000101257	ENSMUST00000191452	2310015K22Rik	-	-
1_80260431_80260747	317	1_80260431_80260747	-	35	0	8.4422	8.24314e-11	3.08621e-10	Up	Distal Intergenic	ENSMUSG00000103404	ENSMUST00000192258	Gm37932	-	-
1_80266525_80266763	239	1_80266525_80266763	-	25	0	7.95843	3.94049e-08	8.10452e-08	Up	3' UTR	ENSMUSG00000103076	ENSMUST00000192839	Gm37902	-	-
1_80294486_80294768	283	1_80294486_80294768	-	36	0	8.48273	4.79413e-11	1.90587e-10	Up	Intron (ENSMUST00000163119/ENSMUSG00000004364, intron 13 of 15)	ENSMUSG00000004364	ENSMUST00000168372	Cul3	cullin 3	KIAA0617
1_80300726_80301023	298	1_80300726_80301023	-	28	0	8.12131	7.04361e-09	1.66011e-08	Up	Intron (ENSMUST00000163119/ENSMUSG00000004364, intron 13 of 15)	ENSMUSG00000004364	ENSMUST00000168372	Cul3	cullin 3	KIAA0617
1_80315300_80315829	530	1_80315300_80315829	-	54	0	9.06635	1.04021e-15	1.33762e-14	Up	Intron (ENSMUST00000163119/ENSMUSG00000004364, intron 14 of 15)	ENSMUSG00000004364	ENSMUST00000192816	Cul3	cullin 3	KIAA0617
[truncated: 55,420 more rows]
